# Supplementary material for: Evolution of Salmonella enterica serotype Typhimurium driven by anthropogenic selection and niche adaptation
Source: PubMed Central journal article supplement (PMC7302871; doi:10.1371/journal.pgen.1008850), 2020-06-08

## A: PHE clinical isolates

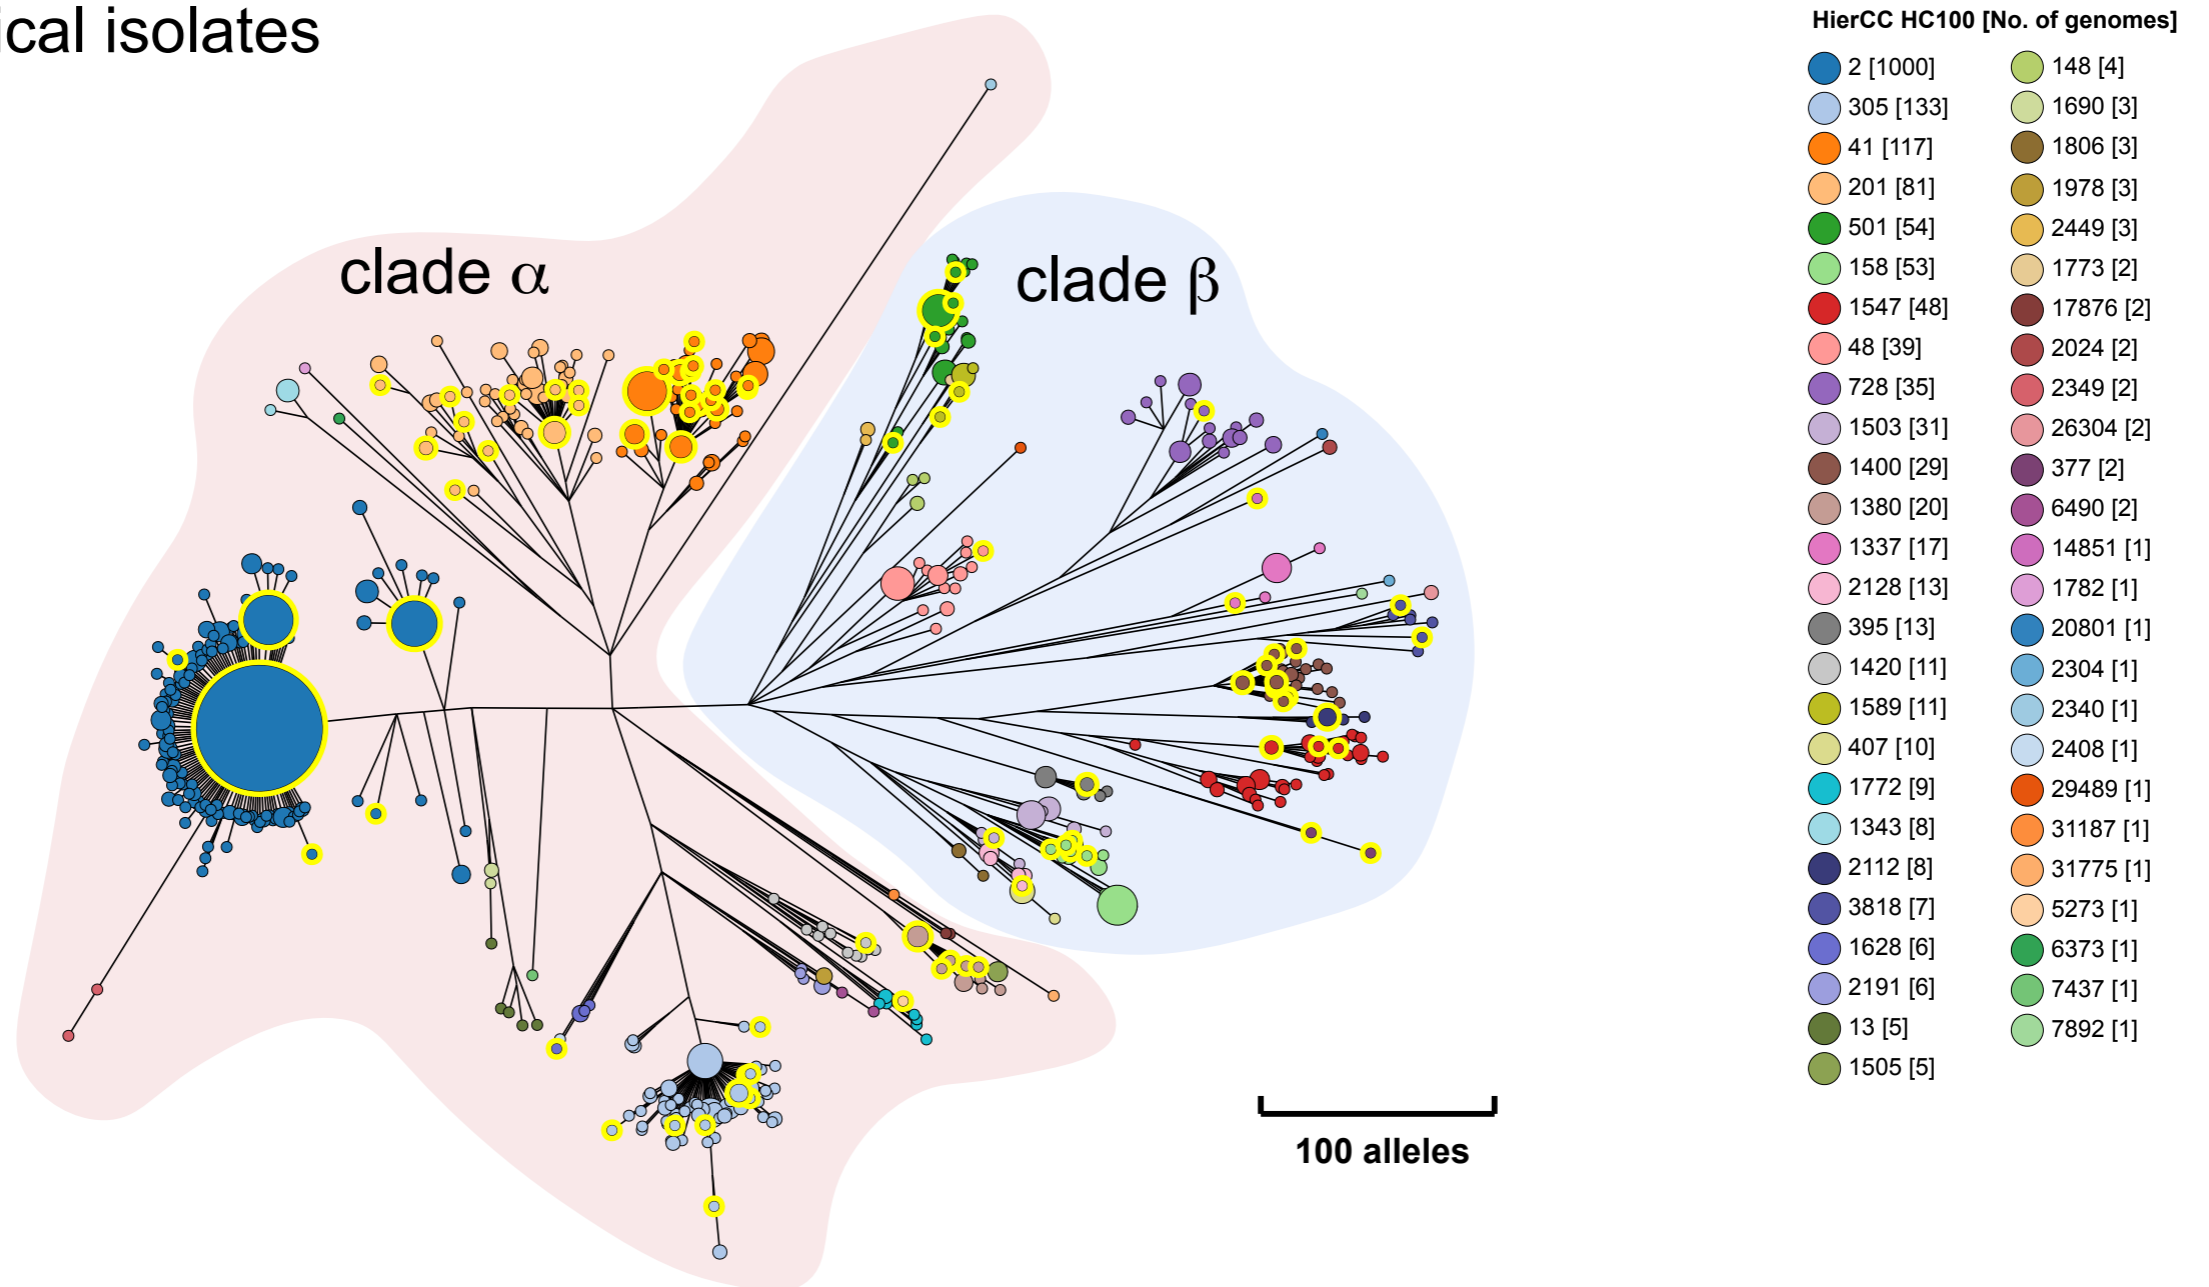

## B: Non-UK Enterobase

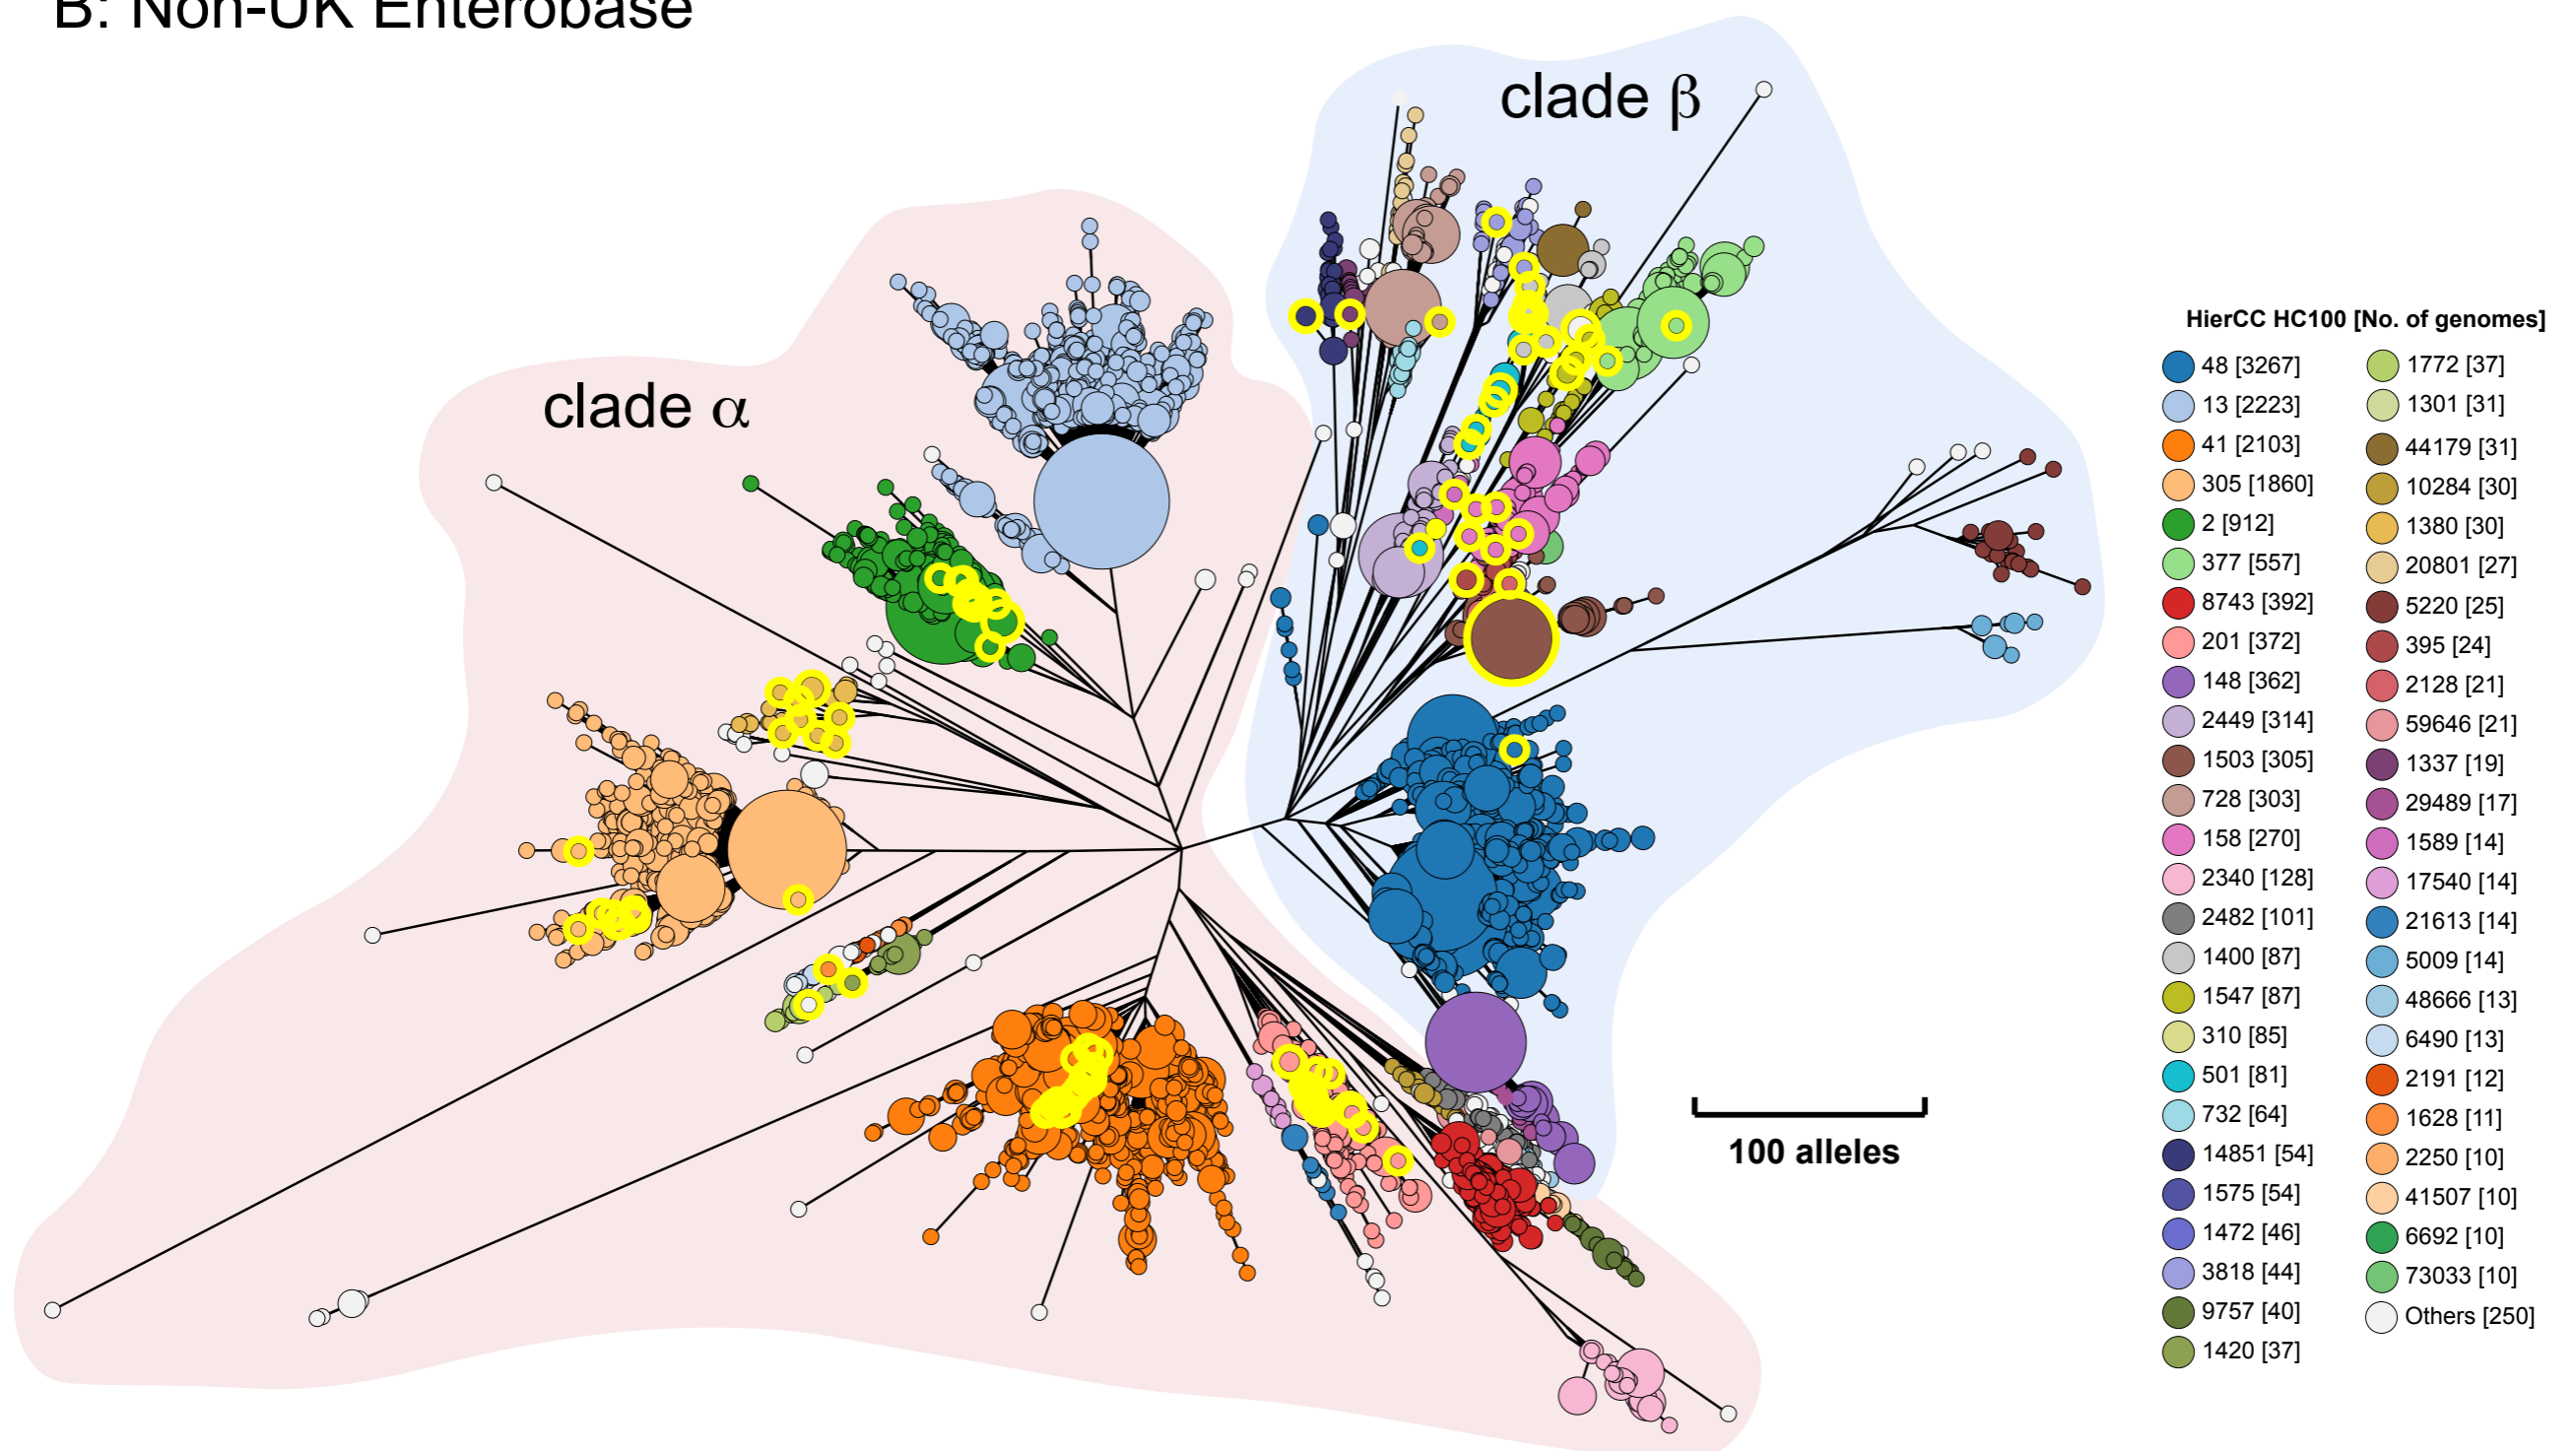

Supplement: pgen.1008850.s002.pdf [file pgen.1008850.s002.pdf]
