# Supplementary material for: Evolution of Salmonella enterica serotype Typhimurium driven by anthropogenic selection and niche adaptation
Source: PubMed Central journal article supplement (PMC7302871; doi:10.1371/journal.pgen.1008850), 2020-06-08

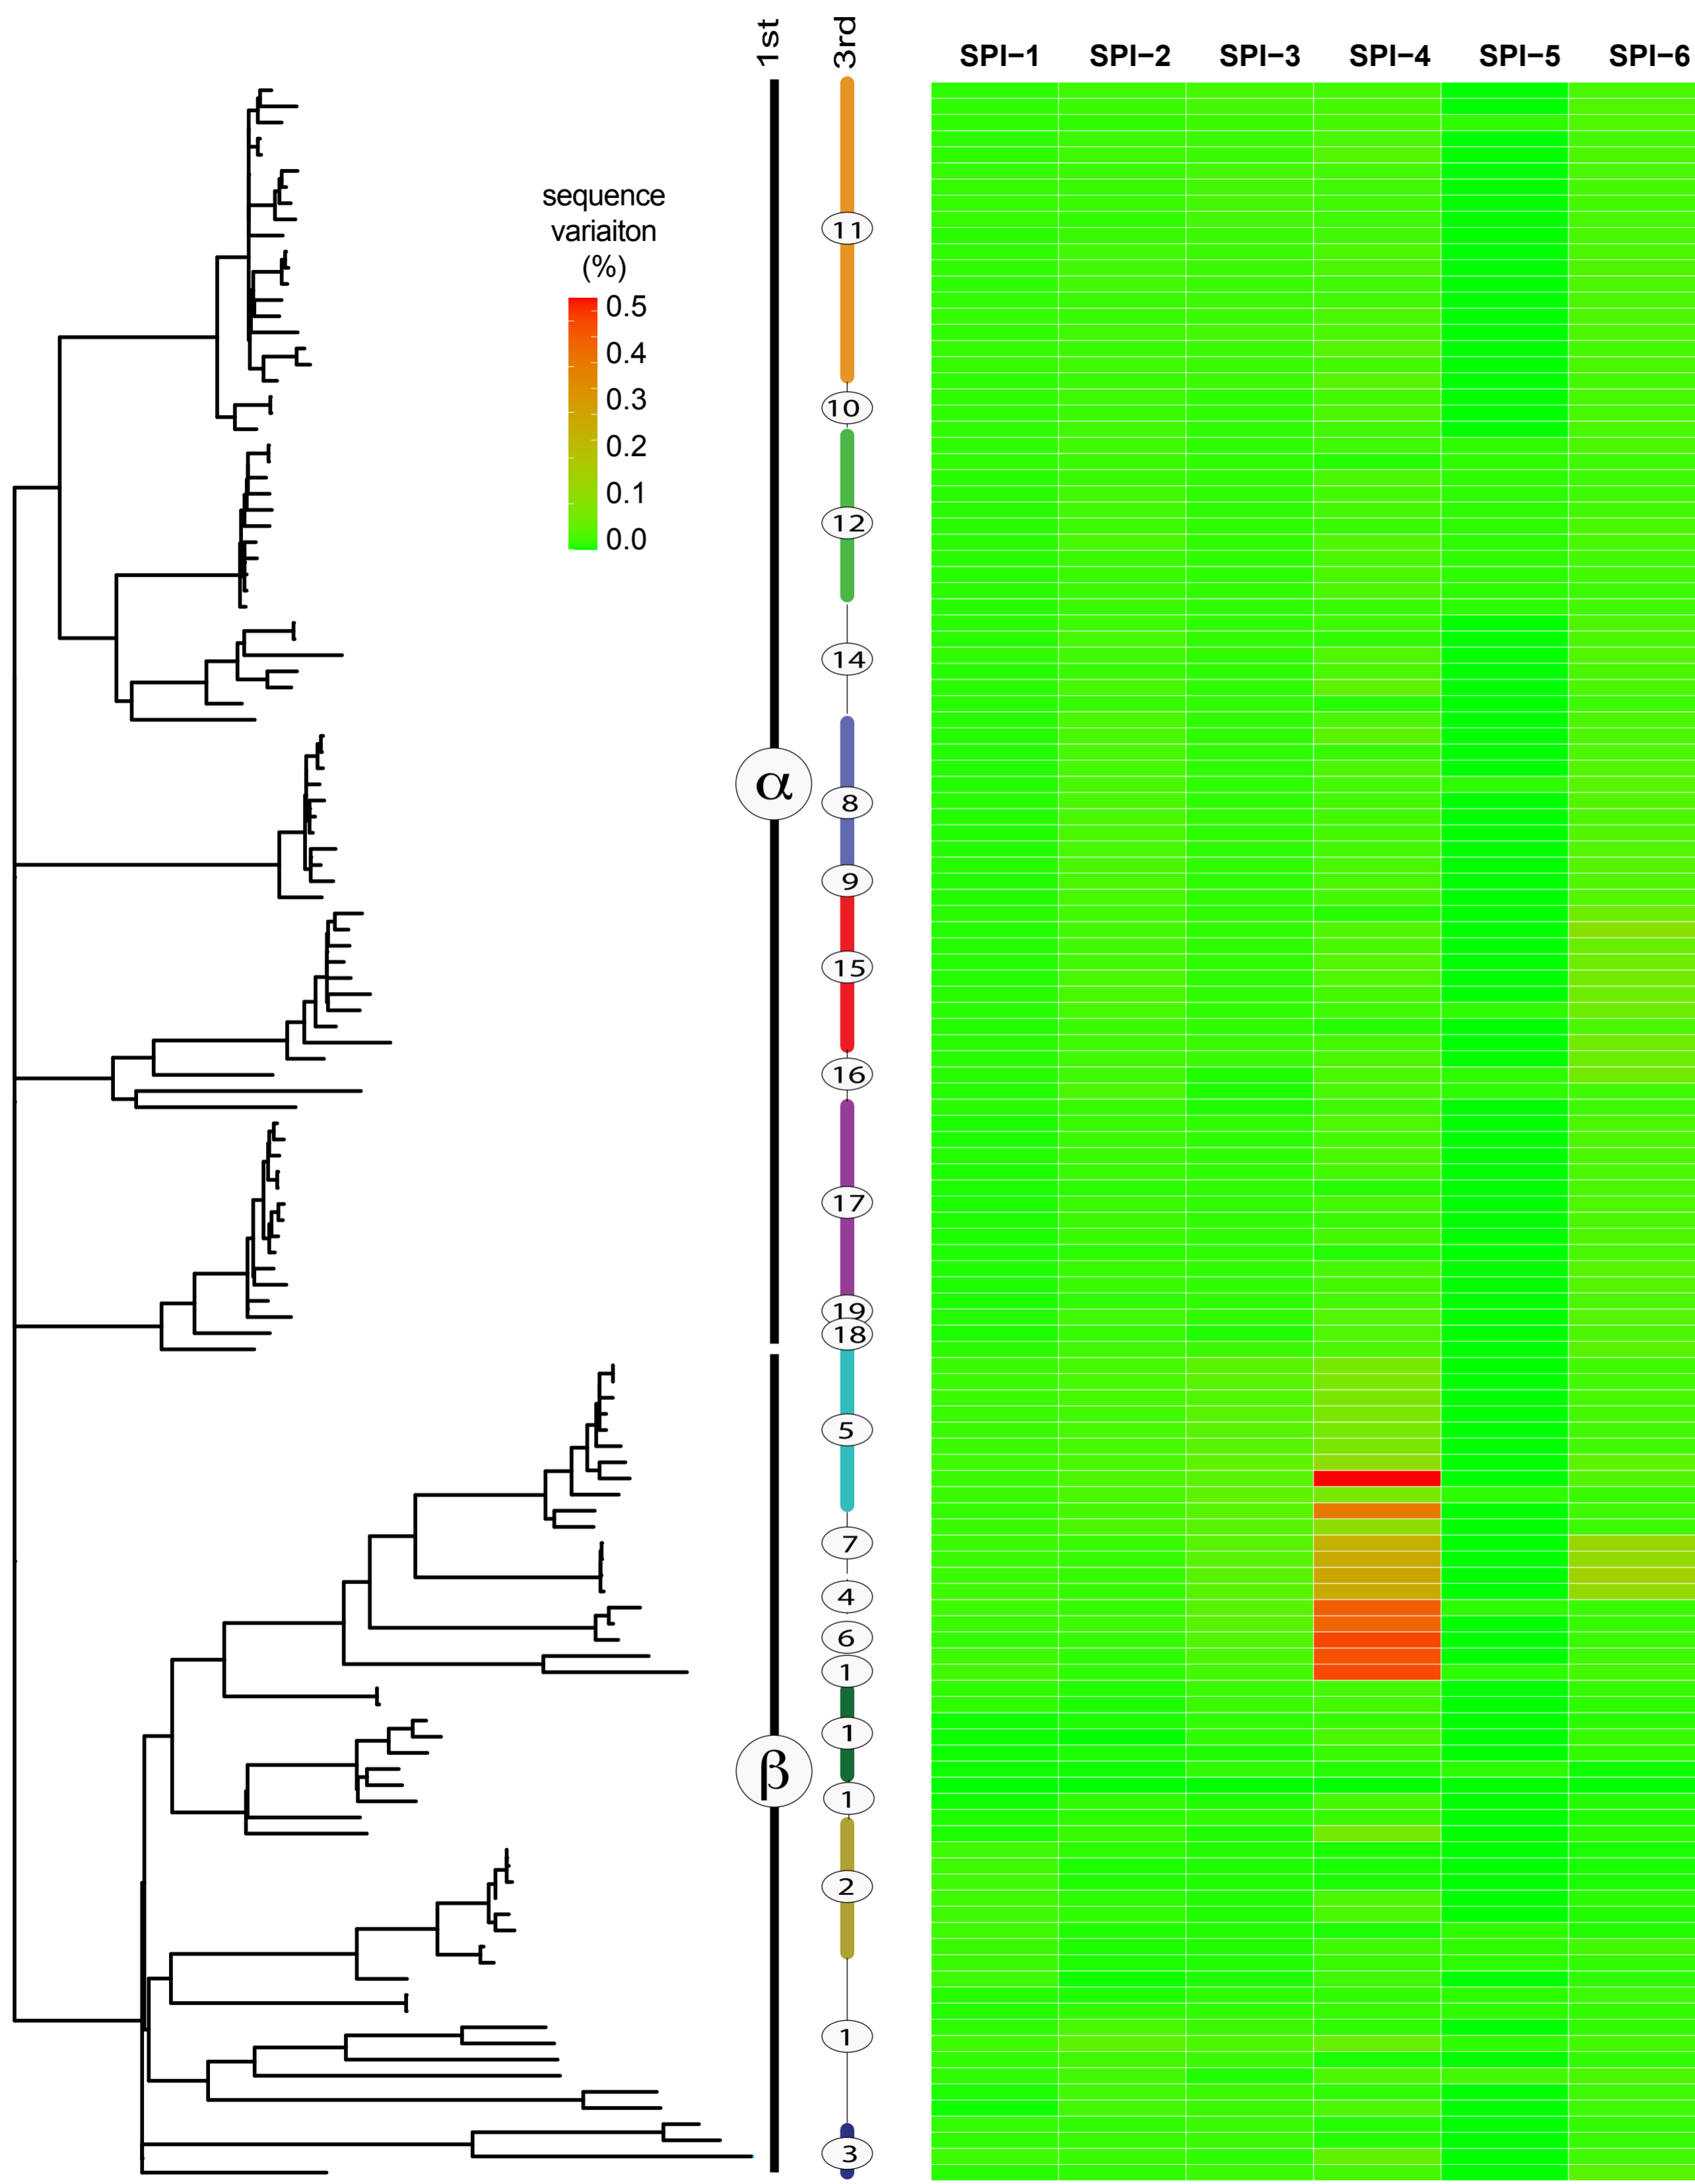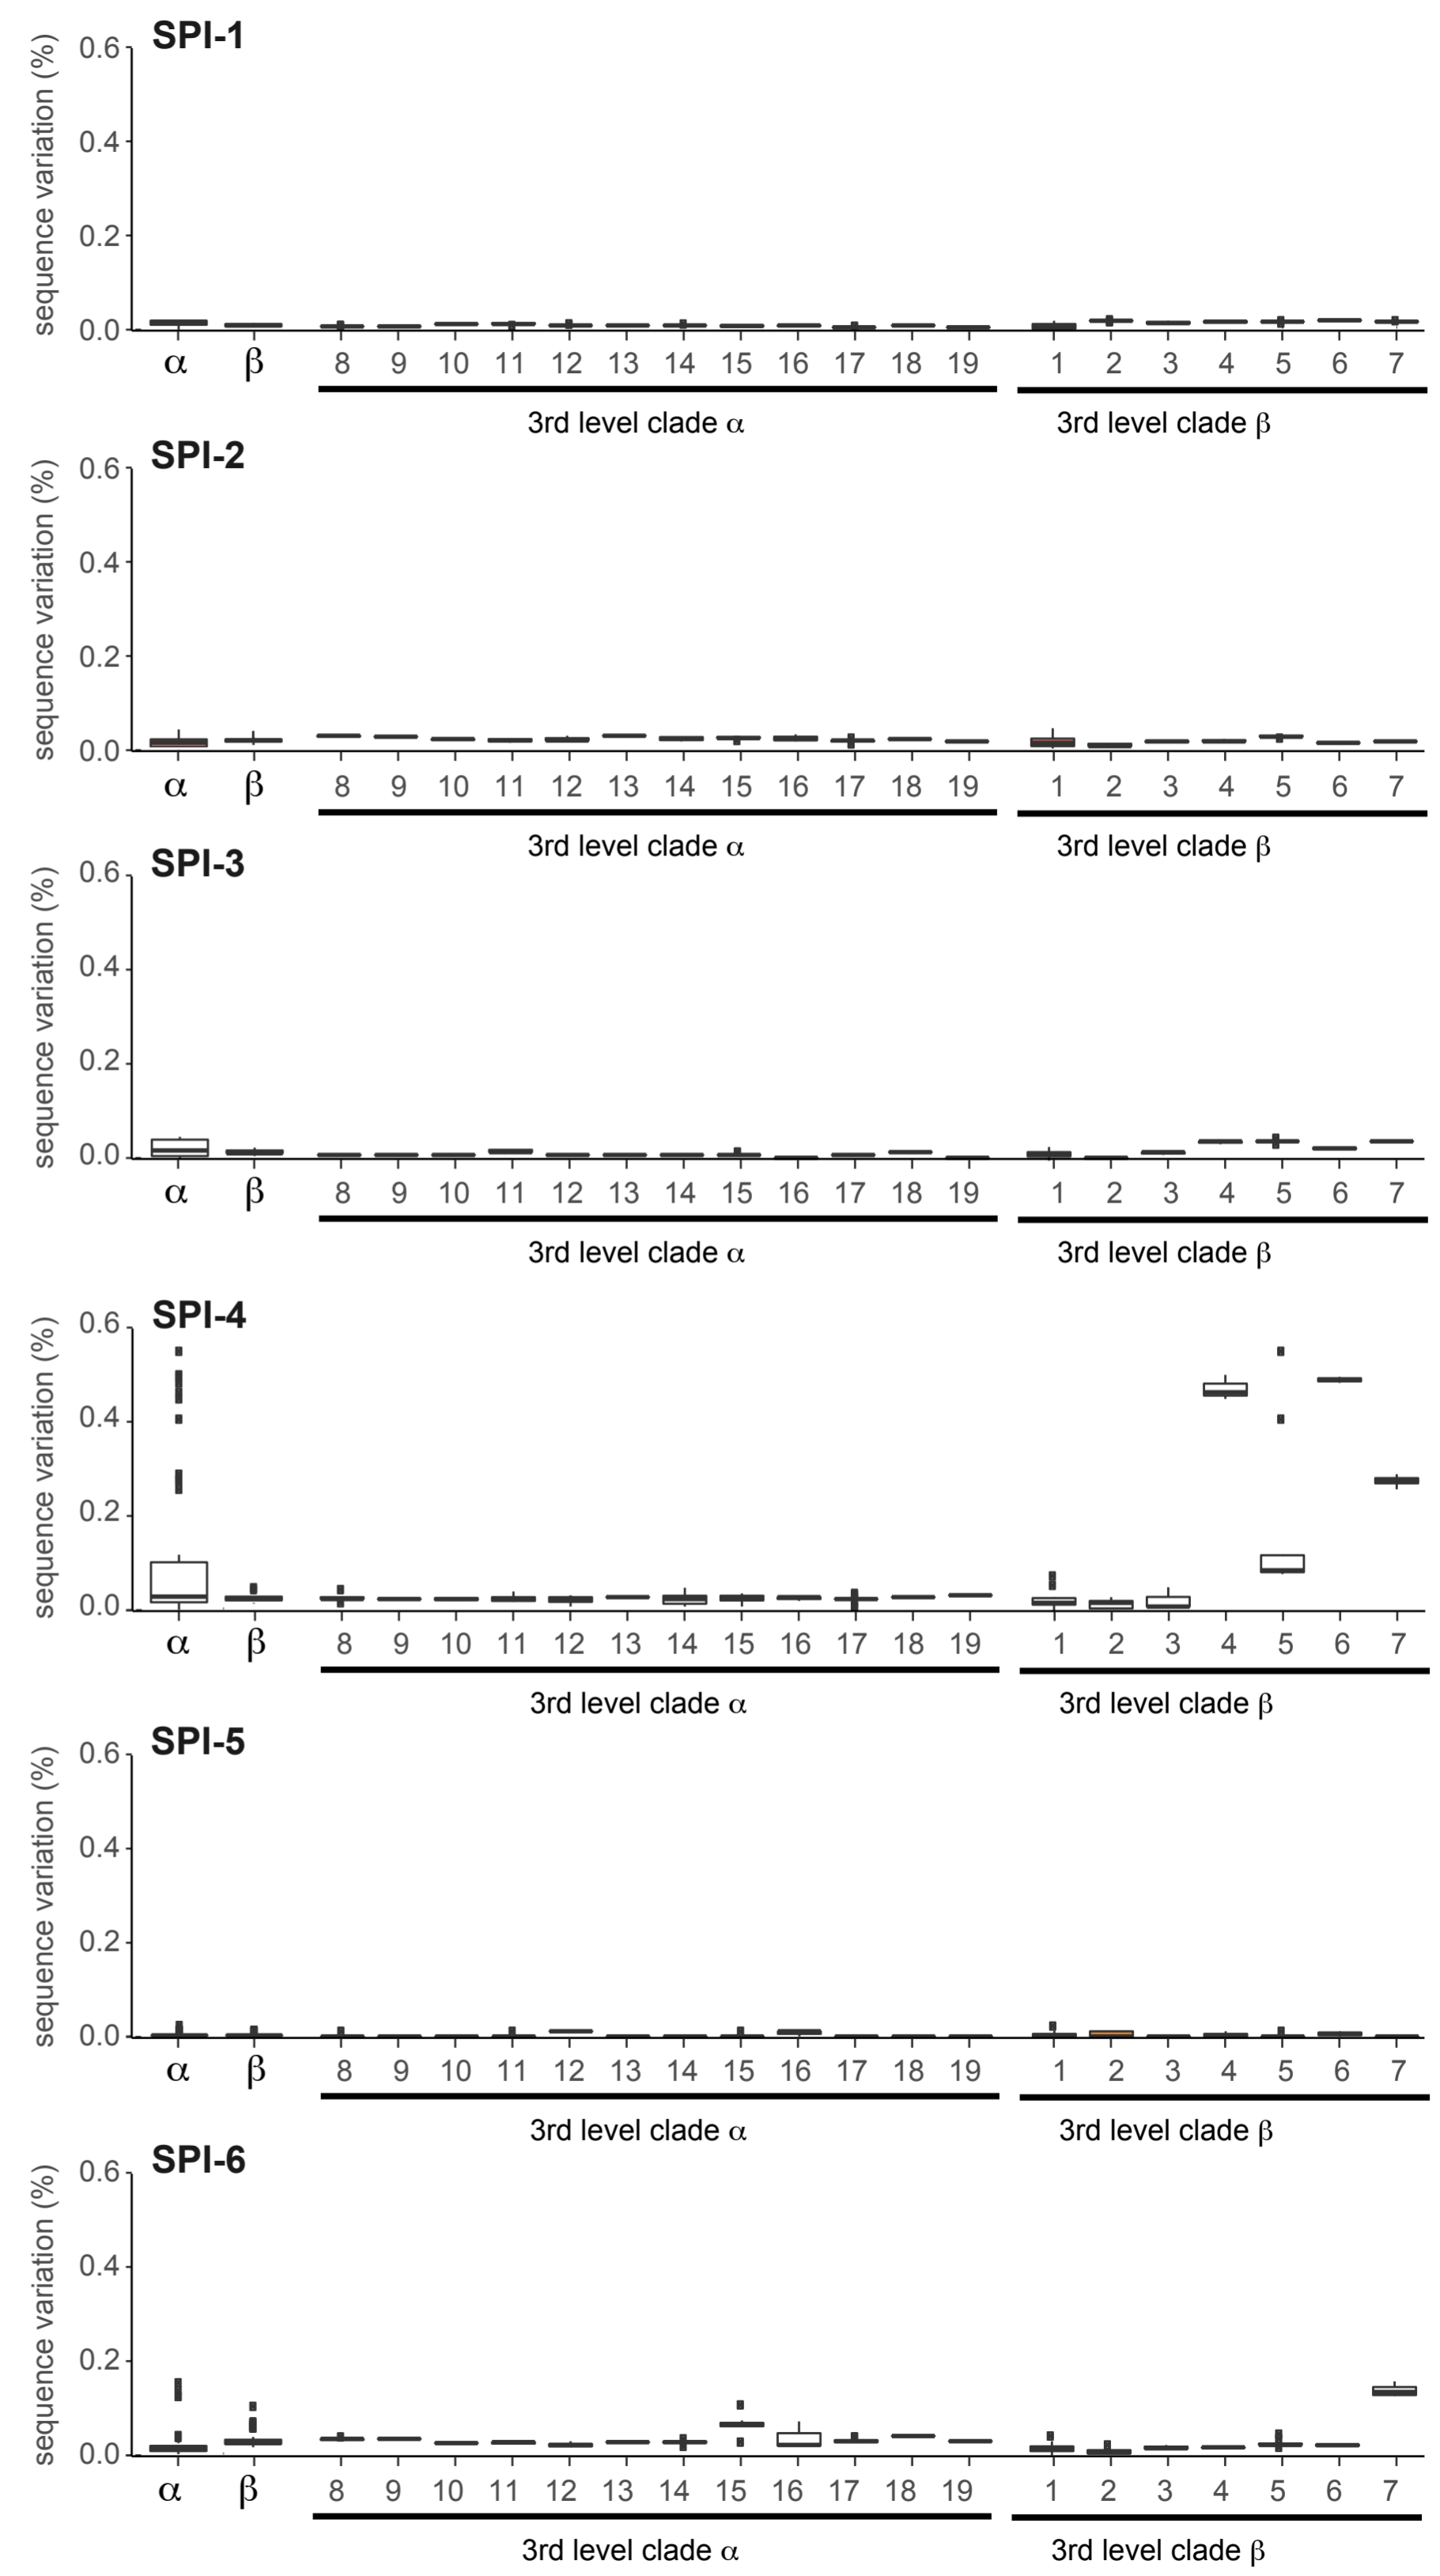

Supplement: pgen.1008850.s003.pdf [file pgen.1008850.s003.pdf]
