# Supplementary material for: Evolution of Salmonella enterica serotype Typhimurium driven by anthropogenic selection and niche adaptation
Source: PLoS Genet. 2020 Jun 8;16(6):e1008850. doi: 10.1371/journal.pgen.1008850 (PMC7302871; doi:10.1371/journal.pgen.1008850)
Supplement: S3 Table — Potential hypothetically disrupted coding sequences (HDCS) were identified in reference genomes though anomalies in annotation transfer from the SL1344 reference sequence using RATT software and manual curation to exclude false positive HDCS. Table can be viewed at https://www.dropbox.com/sh/dh84yyc4tguirw3/AABnbbrSPtqEcjGY6IR6GggLa?dl=0. (XLSX) [file pgen.1008850.s008.xlsx]

## Sheet: Sheet1
locus_tag	gene	Annotation	1960	4698	DT104	9207	DT2	L01157	D23580	A130	SL1344-new	7676	9304
1206	yeaR	conserved hypothetical protein (pseudogene)"	HDCS	HDCS	HDCS	HDCS	HDCS	HDCS	HDCS	HDCS	HDCS	HDCS	HDCS
1437	ydfJ	hypothetical membrane transport protein	HDCS	HDCS	HDCS	HDCS	HDCS	HDCS	HDCS	HDCS	HDCS	HDCS	HDCS
1500		formate dehydrogenase N (nitrate-inducible, alpha	HDCS	HDCS	HDCS	HDCS	HDCS	HDCS	HDCS	HDCS	HDCS	HDCS	HDCS
1789		conserved hypothetical protein (pseudogene)"	HDCS	HDCS	HDCS	HDCS	HDCS	HDCS	HDCS	HDCS	HDCS	HDCS	HDCS
3590		Methionine gamma-lyase (fragment)"	HDCS	HDCS	HDCS	HDCS	HDCS	HDCS	HDCS	HDCS	HDCS	HDCS	HDCS
3741	nepI	hypothetical inner membrane transport protein	HDCS	HDCS	HDCS	HDCS	HDCS	HDCS	HDCS	HDCS	HDCS	HDCS	HDCS
3811		hypothetical bacteriophage integrase	HDCS	HDCS	HDCS	HDCS	HDCS	HDCS	HDCS	HDCS	HDCS	HDCS	HDCS
3984	fdoG	hypothetical 1 formate dehydrogenase-O, major	HDCS	HDCS	HDCS	HDCS	HDCS	HDCS	HDCS	HDCS	HDCS	HDCS	HDCS
4221	fdhF	hypothetical formate dehydrogenase H"	HDCS	HDCS	HDCS	HDCS	HDCS	HDCS	HDCS	HDCS	HDCS	HDCS	HDCS
4385	treB	PTS system, trehalose-specific IIBC component	HDCS	HDCS	HDCS	HDCS	HDCS	HDCS	HDCS	HDCS	HDCS	HDCS	HDCS
0066A		hypothetical viral protein (pseudogene)"	HDCS	HDCS	HDCS	HDCS	HDCS	HDCS	HDCS	HDCS	HDCS	HDCS	HDCS
0292		conserved hypothetical protein (SPI-6	HDCS	HDCS	HDCS	HDCS	HDCS	HDCS	HDCS	HDCS	HDCS	HDCS	HDCS
0294		transposase (pseudogene)"	HDCS	HDCS	HDCS	HDCS	HDCS	HDCS	HDCS	HDCS	HDCS	HDCS	HDCS
0310		conserved hypothetical protein"	HDCS	HDCS	HDCS	HDCS	HDCS	HDCS	HDCS	HDCS	HDCS	HDCS	HDCS
0850	mdaA	oxygen-HDCSensitive NADPH nitroreductase	HDCS	HDCS	HDCS	HDCS	HDCS	HDCS	HDCS	HDCS	HDCS	HDCS	HDCS
0992		transposase (remnant)"	HDCS	HDCS	HDCS	HDCS	HDCS	HDCS	HDCS	HDCS	HDCS	HDCS	HDCS
1830A		conserved hypothetical protein (pseudogene)"	HDCS	HDCS	HDCS	HDCS	HDCS	HDCS	HDCS	HDCS	HDCS	HDCS	HDCS
2885A		hypothetical transposase (pseudogene)"	HDCS	HDCS	HDCS	HDCS	HDCS	HDCS	HDCS	HDCS	HDCS	HDCS	HDCS
3899A		hypothetical exported protein (pseudogene)"	HDCS	HDCS	HDCS	HDCS	HDCS	HDCS	HDCS	HDCS	HDCS	HDCS	HDCS
4369A		conserved hypothetical protein (pseudogene)"	HDCS	HDCS	HDCS	HDCS	HDCS	HDCS	HDCS	HDCS	HDCS	HDCS	HDCS
4427A		conserved hypothetical protein (pseudogene)"	HDCS	HDCS	HDCS	HDCS	HDCS	HDCS	HDCS	HDCS	HDCS	HDCS	HDCS
4523A		hypothetical secreted protein (pseudogene)"	HDCS	HDCS	HDCS	HDCS	HDCS	HDCS	HDCS	HDCS	HDCS	HDCS	HDCS
0083A		hypothetical membrane protein (pseudogene)"	HDCS	HDCS	HDCS	HDCS	HDCS	HDCS	HDCS	HDCS	HDCS	HDCS	HDCS
0085		hypothetical carnitinyl-CoA dehydratase	HDCS	HDCS	HDCS	HDCS	HDCS	HDCS	HDCS	HDCS	HDCS	HDCS	HDCS
0546		transposase (pseudogene)	HDCS	HDCS	HDCS	HDCS	HDCS	HDCS	HDCS	HDCS	HDCS	HDCS	HDCS
0550A		cation efflux protein (pseudogene)	HDCS	HDCS	HDCS	HDCS	HDCS	HDCS	HDCS	HDCS	HDCS	HDCS	HDCS
1874A		conserved hypothetical protein (pseudogene)"	HDCS	HDCS	HDCS	HDCS	HDCS	HDCS	HDCS	HDCS	HDCS	HDCS	HDCS
2219		Putative bacteriophage tail fibre protein (pseudogene)	HDCS	HDCS	HDCS	HDCS	HDCS	HDCS	HDCS	HDCS	HDCS	HDCS	HDCS
3870A		cyclic nucleotide-binding domain protein (pseudogene)	HDCS	HDCS	HDCS	HDCS	HDCS	HDCS	HDCS	HDCS	HDCS	HDCS	HDCS
4445A		hypothetical membrane protein (pseudogene)	HDCS	HDCS	HDCS	HDCS	HDCS	HDCS	HDCS	HDCS	HDCS	HDCS	HDCS
2723		bacteriophage integrase (pseudogene)"	HDCS	HDCS	HDCS	NP	HDCS	HDCS	HDCS	NP	HDCS	HDCS	HDCS
1790		hypothetical transposase(pseudogene)"	HDCS	HDCS	NP	HDCS	HDCS	HDCS	HDCS	HDCS	HDCS	HDCS	HDCS
2747		bacteriophage integrase protein (pseudogene)"	HDCS	NP	HDCS	HDCS	HDCS	HDCS	HDCS	HDCS	HDCS	HDCS	HDCS
2747A		hypothetical transposase (pseudogene)"	HDCS	NP	HDCS	HDCS	HDCS	HDCS	HDCS	HDCS	HDCS	HDCS	HDCS
2635	cIIb	bacteriophage regulatory protein"	NP	NP	NP	NP	NP	NP	NP	NP	0	NP	HDCS
2643	gpD	bacteriophage late control gene"	NP	NP	NP	NP	NP	NP	NP	NP	0	NP	HDCS
2639		predicted bacteriophage protein"	NP	NP	NP	NP	NP	NP	NP	NP	0	NP	0
2642	gpF	bacteriophage tail protein"	NP	NP	NP	NP	NP	NP	NP	NP	0	NP	0
2641		hypothetical bacteriophage replication protein"	NP	NP	NP	NP	NP	NP	0	HDCS	0	NP	NP
2596		predicted bacteriophage protein (fragment)"	NP	NP	NP	NP	NP	0	NP	NP	0	NP	0
2597	recEb	exodeoxyribonuclease VIII"	NP	NP	NP	NP	NP	0	NP	NP	0	NP	0
1973		hypothetical bacteriophage protein"	NP	NP	NP	HDCS	0	0	0	0	0	0	0
1929		hypothetical bacteriophage tail protein	NP	NP	NP	NP	0	0	0	0	0	0	0
1483		transposase (pseudogene)"	HDCS	HDCS	HDCS	0	HDCS	HDCS	NP	HDCS	HDCS	HDCS	HDCS
2591	gpO	bacteriophage replication protein"	NP	NP	NP	0	0	0	0	HDCS	0	NP	0
2583		predicted bacteriophage protein"	NP	NP	NP	0	0	0	0	0	0	0	0
1928	sseK3	Type III secretion system effector protein"	NP	NP	NP	NP	0	0	0	0	0	HDCS	0
0320	dhaF	glycerol dehydratase reactivation factor large	HDCS	0	HDCS	HDCS	HDCS	HDCS	HDCS	HDCS	HDCS	HDCS	HDCS
2208	oafA	hypothetical lipopolysaccharide modification	HDCS	0	HDCS	HDCS	HDCS	0	0	HDCS	0	HDCS	HDCS
0987		hypothetical Host Specificity Protein"	HDCS	0	HDCS	HDCS	0	0	0	0	0	0	0
3934		possible transferase"	HDCS	0	0	HDCS	0	0	0	0	0	0	0
2911	ygbE	conserved hypothetical protein	HDCS	0	0	0	HDCS	HDCS	HDCS	HDCS	0	0	HDCS
4464	tsr	methyl-accepting chemotaxis protein"	HDCS	0	0	0	0	0	0	0	0	0	0
1228	pncA	pyrazinamidase/nicotinamidase"	HDCS	0	0	0	0	0	0	0	0	0	0
1632	yciW	conserved hypothetical protein"	HDCS	0	0	0	0	0	0	0	0	0	0
2273	pmrD	polymyxin B resistance protein"	HDCS	0	0	0	0	0	0	0	0	0	0
2274	menE	O-succinylbenzoic acid-CoA ligase"	HDCS	0	0	0	0	0	0	0	0	0	0
2282	elaC	Ribonuclease Z"	HDCS	0	0	0	0	0	0	0	0	0	0
2283		hypothetical receptor/regulator protein"	HDCS	0	0	0	0	0	0	0	0	0	0
2284	yfbK	lipoprotein"	HDCS	0	0	0	0	0	0	0	0	0	0
2330		hypothetical transcriptional regulator"	HDCS	0	0	0	0	0	0	0	0	0	0
3165	assT	probable arylsulfate sulfotransferase"	HDCS	0	0	0	0	0	0	0	0	0	0
3274	yhbE	hypothetical membrane protein"	HDCS	0	0	0	0	0	0	0	0	0	0
3656	sadA	autotransporter"	HDCS	0	0	0	0	0	0	0	0	0	0
0242	cutF	copper homeostasis protein CutF precursor	HDCS	0	0	0	0	0	0	0	0	0	0
0337		hypothetical periplasmic protein"	HDCS	0	0	0	0	0	0	0	0	0	0
0453	ybaO	hypothetical transcriptional regulator"	HDCS	0	0	0	0	0	0	0	0	0	0
0744	dcoA	oxaloacetate decarboxylase alpha chain (ec	HDCS	0	0	0	0	0	0	0	0	0	0
0767	hutU	urocanate hydratase"	HDCS	0	0	0	0	0	0	0	0	0	0
1627		conserved hypothetical protein	HDCS	0	0	0	0	0	0	0	0	0	0
2277	yfbB	conserved hypothetical protein	HDCS	0	0	0	0	0	0	0	0	0	0
2804	yqaA	hypothetical membrane protein	HDCS	0	0	0	0	0	0	0	0	0	0
3718	sugR	hypothetical ATP binding protein (pseudogene)"	0	HDCS	HDCS	HDCS	HDCS	HDCS	HDCS	HDCS	HDCS	HDCS 0	HDCS
2685		predicted bacteriophage protein"	0	NP	NP	NP	NP	NP	NP	NP	0	NP	NP
2701		predicted bacteriophage protein"	0	NP	NP	NP	NP	NP	NP	NP	0	NP	NP
2676		probable bacteriophage tail fibre protein"	0	HDCS	NP	NP	NP	0	NP	NP	0	NP	NP
2686	nucD2	hypothetical lysozyme"	0	NP	NP	NP	NP	0	NP	NP	0	NP	NP
2694		probable capsid portal protein"	0	NP	NP	NP	NP	0	NP	NP	0	NP	NP
2744		DNA-binding bacteriophage protein"	0	NP	0	NP	0	0	0	HDCS	0	0	0
0980		Tape Measure"	0	HDCS	0	HDCS	0	0	0	0	0	0	0
2745		hypothetical inner membrane protein"	0	NP	0	HDCS	0	0	0	0	0	0	0
2746		hypothetical inner membrane protein"	0	NP	0	HDCS	0	0	0	0	0	0	0
2751		conserved hypothetical protein"	0	NP	0	HDCS	0	0	0	0	0	0	0
1954		predicted bacteriophage protein"	0	NP	0	NP	0	0	0	0	0	0	0
1955	rzpR	hypothetical bacteriophage endopeptidase"	0	NP	0	NP	0	0	0	0	0	0	0
4304	yjfJ	conserved hypothetical protein (pseudogene)"	0	HDCS	0	0	0	0	0	0	HDCS	HDCS	HDCS
0967		hypothetical bacteriophage lysozyme	0	NP	0	0	0	0	0	0	0	0	HDCS
2922		hypothetical protein"	0	HDCS	0	0	0	0	0	0	0	0	0
2923	ygcB	conserved hypothetical protein"	0	HDCS	0	0	0	0	0	0	0	0	0
4334	ytfG	conserved hypothetical protein"	0	HDCS	0	0	0	0	0	0	0	0	0
0309	dinP	DNA polymerase IV"	0	HDCS	0	0	0	0	0	0	0	0	0
0786		hypothetical inner membrane protein"	0	HDCS	0	0	0	0	0	0	0	0	0
0949		predicted bacteriophage protein"	0	HDCS	0	0	0	0	0	0	0	0	0
1938		bacteriophage tape-measure protein	0	HDCS	0	0	0	0	0	0	0	0	0
1942		predicted bacteriophage protein	0	HDCS	0	0	0	0	0	0	0	0	0
1943		predicted bacteriophage protein	0	HDCS	0	0	0	0	0	0	0	0	0
4051		inner membrane protein	lateSTOP	HDCS	lateSTOP	lateSTOP	lateSTOP	lateSTOP	lateSTOP	lateSTOP	0	lateSTOP	lateSTOP
4179	yjbN	conserved hypothetical protein	0	HDCS	0	0	0	0	0	0	0	0	0
2754		hypothetical transposase"	0	NP	0	0	0	0	0	0	0	0	0
0962		Putative Probacteriophage Protein"	0	NP	0	0	0	0	0	0	0	0	0
0955		predicted bacteriophage protein	0	NP	0	0	0	0	0	0	0	0	0
0960		predicted bacteriophage protein	0	NP	0	0	0	0	0	0	0	0	0
0289	sciY	hypothetical phosphotriesterase (pseudogene)"	0	0	HDCS	HDCS	HDCS	HDCS	HDCS	HDCS	HDCS	HDCS	HDCS
2673		hypothetical DNA-invertase"	0	0	NP	NP	NP	0	NP	NP	0	NP	NP
2730		hypothetical ATPase"	0	0	HDCS	NP	0	0	0	NP	0	0	0
2738		hypothetical hexulose 6 phosphate synthase"	0	0	HDCS	NP	0	0	0	NP	0	0	0
0513		probable metabolite transport protein"	0	0	NP	HDCS	0	0	0	0	0	0	0
0626	rlpA	rare lipoprotein A precursor	0	0	HDCS	HDCS	0	0	0	0	0	0	0
1696	ychP	hypothetical invasin"	0	0	NP	0	HDCS	HDCS	0	0	0	0	0
1484		conserved hypothetical protein"	0	0	HDCS	0	HDCS	0	0	0	0	0	0
1485		hypothetical LacI-family transcriptional	0	0	HDCS	0	NP	0	0	0	0	0	0
1748	yeaY	inner or outer membrane protein"	0	0	NP	0	HDCS	0	0	0	0	0	0
0515	allP	hypothetical allantoin permease"	0	0	NP	0	HDCS	0	0	0	0	0	0
0516	allB	allantoinase"	0	0	NP	0	0	0	HDCS	0	0	0	0
1796		DNA Invertase"	0	0	NP	0	0	0	NP	0	0	0	0
1797	pagM	virulence factor"	0	0	NP	0	0	0	NP	0	0	0	0
1798		transposase (pseudogene)"	0	0	NP	0	0	0	NP	0	0	0	0
1799	pagK	bacteriophage encoded pagK (phoPQ-activated	0	0	NP	0	0	0	NP	0	0	0	0
1788		hypothetical protein"	0	0	NP	0	0	0	0	0	HDCS	0	0
1768		hypothetical exported protein"	0	0	NP	0	0	0	0	0	0	HDCS	0
1244		conserved hypothetical protein"	0	0	HDCS	0	0	0	0	0	0	0	0
1284	ydiD	hypothetical ligase/synthetase"	0	0	HDCS	0	0	0	0	0	0	0	0
2157		hypothetical transcriptional regulator"	0	0	HDCS	0	0	0	0	0	0	0	0
2384	xapA	xanthosine permease"	0	0	HDCS	0	0	0	0	0	0	0	0
3223	garD	D-galactarate dehydratase"	0	0	HDCS	0	0	0	0	0	0	0	0
3362	envR	TetR-family transcriptional regulator"	0	0	HDCS	0	0	0	0	0	0	0	0
4145		predicted bacteriophage protein"	0	0	HDCS	0	0	0	0	0	0	0	0
4491	yjjV	conserved hypothetical protein"	0	0	HDCS	0	0	0	0	0	0	0	0
4499	stjB	fimbrial usher protein"	0	0	HDCS	0	0	0	0	0	0	0	0
0286		Rhs-family protein (SPI-6 associated)"	0	0	HDCS	0	0	0	0	0	0	0	0
0286B		Rhs-family protein fragment"	0	0	HDCS	0	0	0	0	0	0	0	0
0328		hypothetical lysR family transcriptional	0	0	HDCS	0	0	0	0	0	0	0	0
0431		hypothetical exported protein"	0	0	HDCS	0	0	0	0	0	0	0	0
0487	ushA	UDP-sugar hydrolase"	0	0	HDCS	0	0	0	0	0	0	0	0
0490		probable secreted protein"	0	0	HDCS	0	0	0	0	0	0	0	0
0510	gcl	glyoxylate carboligase"	0	0	HDCS	0	0	0	0	0	0	0	0
0523	ylbE	conserved hypothetical protein"	0	0	HDCS	0	0	0	0	0	0	0	0
0642	ybeQ	conserved hypothetical protein"	0	0	HDCS	0	0	0	0	0	0	0	0
0811	ybiR	hypothetical membrane protein"	0	0	HDCS	0	0	0	0	0	0	0	0
0940		hypothetical ion:amino acid symporter"	0	0	HDCS	0	0	0	0	0	0	0	0
0958		Gifsy-2 bacteriophage protein"	0	0	HDCS	0	0	0	0	0	0	0	0
0985		hypothetical bacteriophage minor tail protein"	0	0	HDCS	0	0	0	0	0	0	0	0
0032		hypothetical membrane protein	0	0	HDCS	0	0	0	0	0	0	0	0
1164	pepT	Peptidase T	0	0	HDCS	0	0	0	0	0	0	0	0
1762		hypothetical membrane protein"	0	0	NP	0	0	0	0	0	0	0	0
1779	yebU	conserved hypothetical protein"	0	0	NP	0	0	0	0	0	0	0	0
2575		predicted bacteriophage protein"	0	0	NP	0	0	0	0	0	0	0	0
1165		conserved hypothetical protein (pseudogene)"	0	0	0	HDCS	HDCS	HDCS	HDCS	HDCS	HDCS	HDCS	HDCS
2742		PTS system, glucose-specific IIbc component"	0	0	0	NP	HDCS	0	0	HDCS	0	0	0
2739	hxlA	3-hexulose-6-phosphate synthase"	0	0	0	NP	0	0	0	HDCS	0	0	0
2740	hxlB	6-phospho 3-hexuloisomerase"	0	0	0	NP	0	0	0	HDCS	0	0	0
2725		conserved hypothetical protein"	0	0	0	NP	0	0	0	NP	0	0	0
4465		hypothetical transcriptional regulatory protein"	0	0	0	HDCS	0	0	0	0	0	HDCS	HDCS
1482		conserved hypothetical protein"	0	0	0	HDCS	0	0	0	0	0	0	0
4455	hsdS	type I restriction enzyme"	0	0	0	HDCS	0	0	0	0	0	0	0
0042		hypothetical glycosyl hydrolase"	0	0	0	HDCS	0	0	0	0	0	0	0
2845	avrA	Type III secretion system effector	0	0	0	HDCS	0	0	0	0	0	0	0
3367	yrdB	conserved hypothetical protein	0	0	0	HDCS	0	0	0	0	0	0	0
2743		hypothetical solute-binding protein"	0	0	0	NP	0	0	0	0	0	0	0
1601		hypothetical transcriptional regulator	0	0	0	0	HDCS	HDCS	HDCS	HDCS	HDCS	HDCS	HDCS
1830		conserved hypothetical protein (pseudogene)"	0	0	0	0	HDCS	HDCS	HDCS	HDCS	HDCS	HDCS	HDCS
2475	ratB	hypothetical outer membrane protein (RatB)	0	0	0	0	HDCS	HDCS	HDCS	HDCS	HDCS	HDCS	HDCS
3602	lpfD	hypothetical fimbrial protein (LpfD)"	0	0	0	0	HDCS	HDCS	HDCS	HDCS	HDCS	HDCS	HDCS
0645	ybeU	hypothetical conserved hypothetical protein	0	0	0	0	HDCS	HDCS	HDCS	HDCS	HDCS	HDCS	HDCS
0157	yacH	hypothetical exported protein"	0	0	0	0	HDCS	HDCS	HDCS	HDCS	HDCS	0	HDCS
2555		predicted bacteriophage protein"	0	0	0	0	HDCS	NP	0	0	0	0	0
2110		hypothetical protein"	0	0	0	0	HDCS	0	0	HDCS	0	0	0
1874		hypothetical membrane protein"	0	0	0	0	HDCS	0	0	0	0	0	HDCS
0995	gtgE	bacteriophage encoded virulence factor"	0	0	0	0	HDCS	0	0	0	0	0	HDCS
1490		hypothetical hydrolase"	0	0	0	0	HDCS	0	0	0	0	0	0
1530	pdgL	D-alanyl-D-alanine dipeptidase"	0	0	0	0	HDCS	0	0	0	0	0	0
2492		dimethyl sulfoxide reductase"	0	0	0	0	HDCS	0	0	0	0	0	0
2663		hypothetical type I secretion protein,	0	0	0	0	HDCS	0	0	0	0	0	0
2950	sdaC	serine transporter"	0	0	0	0	HDCS	0	0	0	0	0	0
3198	ygJU	probable membrane transport protein"	0	0	0	0	HDCS	0	0	0	0	0	0
3563		L-asparginase"	0	0	0	0	HDCS	0	0	0	0	0	0
3727	cigR	hypothetical inner membrane protein"	0	0	0	0	HDCS	0	0	0	0	0	0
4185	aphA	class B acid phosphatase precursor"	0	0	0	0	HDCS	0	0	0	0	0	0
4387	mgtA	Mg(2+) transport ATPase, P-type"	0	0	0	0	HDCS	0	0	0	0	0	0
0055		oxaloacetate decarboxylase beta chain (ec	0	0	0	0	HDCS	0	0	0	0	0	0
0173	yadG	hypothetical ABC transporter ATP-binding protein"	0	0	0	0	HDCS	0	0	0	0	0	0
0336		possible transmembrane regulator"	0	0	0	0	HDCS	0	0	0	0	0	0
0451	cof	conserved hypothetical protein"	0	0	0	0	HDCS	0	0	0	0	0	0
0613	citA	sensor kinase DpiB"	0	0	0	0	HDCS	0	0	0	0	0	0
0873	ltaA	L-allo-threonine aldolase"	0	0	0	0	HDCS	0	0	0	0	0	0
0920	rec2	competence gene-DNA binding and transport"	0	0	0	0	HDCS	0	0	0	0	0	0
0452		hypothetical lyase	0	0	0	0	HDCS	0	0	0	0	0	0
0957		DNA Damage Inducible Protein	0	0	0	0	HDCS	0	0	0	0	0	0
1989		hypothetical protein	0	0	0	0	HDCS	0	0	0	0	0	0
2903	rpoS	RNA polymerase sigma subunit RpoS (sigma-38)	0	0	0	0	HDCS	0	0	0	0	0	0
3107		possible hydrolase	0	0	0	0	HDCS	0	0	0	0	0	0
3304	yhcG	conserved hypothetical protein	0	0	0	0	HDCS	0	0	0	0	0	0
3447	yhfL	conserved hypothetical protein	0	0	0	0	HDCS	0	0	0	0	0	0
2659	yfjG	conserved hypothetical protein"	0	0	0	0	NP	0	0	0	0	0	0
3188	yqjI	conserved hypothetical protein	0	0	0	0	HDCS	0	0	0	0	0	0
3711		conserved hypothetical protein (pseudogene)"	0	0	0	0	0	HDCS	HDCS	HDCS	0	0	0
3733		hypothetical transferase"	0	0	0	0	0	HDCS	HDCS	HDCS	0	0	0
3419	yheO	conserved hypothetical protein"	0	0	0	0	0	HDCS	NP	0	0	0	0
3854	yieO	hypothetical transmembrane efflux protein	0	0	0	0	0	HDCS	0	0	HDCS	NP	HDCS
1628	steC	Type III secretion system effector protein, has	0	0	0	0	0	HDCS	0	0	0	HDCS	HDCS
3849	rbsA	high affinity ribose transport protein"	0	0	0	0	0	HDCS	0	0	0	NP	0
2556		predicted bacteriophage protein"	0	0	0	0	0	NP	0	0	0	HDCS	0
1428		hypothetical dimethyl sulphoxide reductase	0	0	0	0	0	HDCS	0	0	0	0	0
1459		outer membrane protein"	0	0	0	0	0	HDCS	0	0	0	0	0
2100	yegE	hypothetical membrane protein"	0	0	0	0	0	HDCS	0	0	0	0	0
2243		hypothetical transmembrane transpot protein"	0	0	0	0	0	HDCS	0	0	0	0	0
2558		predicted bacteriophage protein"	0	0	0	0	0	HDCS	0	0	0	0	0
3634	yiaL	conserved hypothetical protein"	0	0	0	0	0	HDCS	0	0	0	0	0
3756	uhpA	two-component system response regulator protein"	0	0	0	0	0	HDCS	0	0	0	0	0
3963	yihO	hypothetical membrane transport protein"	0	0	0	0	0	HDCS	0	0	0	0	0
4054		conserved hypothetical protein"	0	0	0	0	0	HDCS	0	0	0	0	0
4424		type II restriction enzyme"	0	0	0	0	0	HDCS	0	0	0	0	0
0160		HNH endonuclease"	0	0	0	0	0	HDCS	0	0	0	0	0
0198	stfD	periplasmic fimbrial chaperone stfd"	0	0	0	0	0	HDCS	0	0	0	0	0
0300	sinR	LysR-family transcriptional regulator (SPI-6	0	0	0	0	0	HDCS	0	0	0	0	0
0315	crl	curlin genes transcriptional activator"	0	0	0	0	0	HDCS	0	0	0	0	0
0332	stbD	hypothetical fimbrial protein"	0	0	0	0	0	HDCS	0	0	0	0	0
0594	ybdO	hypothetical lysR-family transcriptional	0	0	0	0	0	HDCS	0	0	0	0	0
0605	rna	ribonuclease I precursor"	0	0	0	0	0	HDCS	0	0	0	0	0
3616		conserved hypothetical protein	0	0	0	0	0	HDCS	0	0	0	0	0
3738		hypothetical NtrC-family transcriptional	0	0	0	0	0	HDCS	0	0	0	0	0
2561		predicted bacteriophage protein"	0	0	0	0	0	NP	0	0	0	0	0
2564		predicted bacteriophage protein"	0	0	0	0	0	NP	0	0	0	0	0
2565		predicted bacteriophage protein"	0	0	0	0	0	NP	0	0	0	0	0
2552		similar to a DNA recombinase"	0	0	0	0	0	NP	0	0	0	0	0
1477		hypothetical isomerase"	0	0	0	0	0	0	HDCS	HDCS	0	0	0
1873		hypothetical exported protein"	0	0	0	0	0	0	HDCS	HDCS	0	0	0
2653		conserved hypothetical protein"	0	0	0	0	0	0	HDCS	HDCS	0	0	0
3327	ttdA	tartrate dehydratase"	0	0	0	0	0	0	HDCS	HDCS	0	0	0
4131		hypothetical protein"	0	0	0	0	0	0	HDCS	HDCS	0	0	0
4288	yjvE	hypothetical arginine-binding periplasmic	0	0	0	0	0	0	HDCS	HDCS	0	0	0
0881	ybjZ	conserved hypothetical ABC transporter"	0	0	0	0	0	0	HDCS	HDCS	0	0	0
2990		possible regulatory protein	0	0	0	0	0	0	HDCS	HDCS	0	0	0
3051		possible ABC-transport protein	0	0	0	0	0	0	HDCS	HDCS	0	0	0
1446	ydeE	hypothetical membrane protein"	0	0	0	0	0	0	HDCS	0	0	0	0
1567		hypothetical membrane protein"	0	0	0	0	0	0	HDCS	0	0	0	0
1806		Integrase"	0	0	0	0	0	0	HDCS	0	0	0	0
2214		predicted bacteriophage protein"	0	0	0	0	0	0	HDCS	0	0	0	0
3589	bcsG	hypothetical membrane protein"	0	0	0	0	0	0	HDCS	0	0	0	0
4223	lpxO	hypothetical membrane-bound beta-hydroxylase"	0	0	0	0	0	0	HDCS	0	0	0	0
0809	ybiP	hypothetical membrane protein"	0	0	0	0	0	0	HDCS	0	0	0	0
0952		Gifsy-2 replication Protein O"	0	0	0	0	0	0	HDCS	0	0	0	0
0990		phage tail fibre (fragment)"	0	0	0	0	0	0	NP	0	0	0	0
0991	sseI	Type III secretion system effector protein,	0	0	0	0	0	0	HDCS	0	0	0	0
0988		hypothetical Tail Fiber Protein	0	0	0	0	0	0	HDCS	0	0	0	0
4132		hypothetical protein"	0	0	0	0	0	0	0	HDCS	0	HDCS	0
1188		hypothetical protein"	0	0	0	0	0	0	0	HDCS	0	0	0
1478		conserved hypothetical protein"	0	0	0	0	0	0	0	HDCS	0	0	0
2553		predicted bacteriophage protein"	0	0	0	0	0	0	0	HDCS	0	0	0
3191	oat	probable aminotransferase"	0	0	0	0	0	0	0	HDCS	0	0	0
4255	phoN	nonspecific acid phosphatase precursor"	0	0	0	0	0	0	0	HDCS	0	0	0
0297	safC	salmonella atypical fimbria outer membrane usher"	0	0	0	0	0	0	0	HDCS	0	0	0
0311	prfH	hypothetical peptide chain release factor"	0	0	0	0	0	0	0	HDCS	0	0	0
0408	yajI	hypothetical lipoprotein"	0	0	0	0	0	0	0	HDCS	0	0	0
0422	phnT	probable ATP-binding component	0	0	0	0	0	0	0	HDCS	0	0	0
4384	treC	trehalose-6-phosphate hydrolase	0	0	0	0	0	0	0	HDCS	0	0	0
4527	lasT	hypothetical RNA methyltransferase	0	0	0	0	0	0	0	HDCS	0	0	0
1294	ydiN	Putative MFS-family transport protein	0	0	0	0	0	0	0	0	HDCS	0	0
3489	glpR	hypothetical glycerol-3-phosphate regulon	0	0	0	0	0	0	0	0	HDCS	0	0
0700		hypothetical udp-galactopyranose mutase	0	0	0	0	0	0	0	0	HDCS	0	0
0073		L-carnitine dehydratase"	0	0	0	0	0	0	0	0	HDCS	0	0
1253	katE	catalase HPII"	0	0	0	0	0	0	0	0	0	HDCS	HDCS
1528	ydcW	hypothetical aldehyde dehydrogenase"	0	0	0	0	0	0	0	0	0	HDCS	HDCS
1947		capsid related protein"	0	0	0	0	0	0	0	0	0	HDCS	HDCS
3765		hypothetical membrane protein"	0	0	0	0	0	0	0	0	0	HDCS	HDCS
3997	rhaS	L-rhamnose operon regulatory protein"	0	0	0	0	0	0	0	0	0	HDCS	HDCS
0540	fimH	FimH protein precursor"	0	0	0	0	0	0	0	0	0	HDCS	HDCS
0839	dacC	D-alanyl-D-alanine carboxypeptidase	0	0	0	0	0	0	0	0	0	HDCS	HDCS
1093	yceA	conserved hypothetical protein"	0	0	0	0	0	0	0	0	0	HDCS	0
1319	ttrB	tetrathionate reductase subunit B"	0	0	0	0	0	0	0	0	0	HDCS	0
1561	sseJ	Type III secretion system effector protein	0	0	0	0	0	0	0	0	0	HDCS	0
1677	oppA	periplasmic oligopeptide-binding protein	0	0	0	0	0	0	0	0	0	HDCS	0
1915	gcpA	Biofilm formation in nutrient-deficient medium,	0	0	0	0	0	0	0	0	0	HDCS	0
2113	sseK2	Type III secretion system effector protein"	0	0	0	0	0	0	0	0	0	HDCS	0
2546	gogB	Type III secretion system effector protein"	0	0	0	0	0	0	0	0	0	HDCS	0
2846	sprB	AraC-family transcriptional regulator"	0	0	0	0	0	0	0	0	0	HDCS	0
2942	ygcY	probable glucarate dehydratase"	0	0	0	0	0	0	0	0	0	HDCS	0
3088	nuHDCS	nucleoside permease nuHDCS (nucleoside-transport	0	0	0	0	0	0	0	0	0	HDCS	0
3361		hypothetical membrane protein"	0	0	0	0	0	0	0	0	0	HDCS	0
3799		hypothetical membrane transport protein"	0	0	0	0	0	0	0	0	0	HDCS	0
3800		possible racemase"	0	0	0	0	0	0	0	0	0	HDCS	0
3801		hypothetical LysR-family transcriptioanl	0	0	0	0	0	0	0	0	0	HDCS	0
3802	gyrB	DNA gyrase subunit B"	0	0	0	0	0	0	0	0	0	HDCS	0
4195	siiC	hypothetical type-I secretion protein"	0	0	0	0	0	0	0	0	0	HDCS	0
4230	yjdB	hypothetical membrane protein"	0	0	0	0	0	0	0	0	0	HDCS	0
4316	sgaT	hypothetical transport protein SgaT"	0	0	0	0	0	0	0	0	0	HDCS	0
4360		conserved hypothetical membrane protein"	0	0	0	0	0	0	0	0	0	HDCS	0
0080	yaaU	hypothetical metabolite transport protein"	0	0	0	0	0	0	0	0	0	HDCS	0
0099A		hypothetical inner membrane protein (pseudogene)"	0	0	0	0	0	0	0	0	0	HDCS	0
0251	yafC	hypothetical transcriptional regulator"	0	0	0	0	0	0	0	0	0	HDCS	0
0432		conserved hypothetical protein"	0	0	0	0	0	0	0	0	0	HDCS	0
0566	nfnB	oxygen-HDCSensitive NAD(P)H nitroreductase	0	0	0	0	0	0	0	0	0	HDCS	0
1075	ycdZ	hypothetical membrane protein	0	0	0	0	0	0	0	0	0	HDCS	0
2115		hypothetical membrane protein	0	0	0	0	0	0	0	0	0	HDCS	0
4023	ego	hypothetical ABC transporter	0	0	0	0	0	0	0	0	0	HDCS	0
4197	siiE	large repetitive protein	0	0	0	0	0	0	0	0	0	HDCS	0
1177		predicted bacteriophage protein"	0	0	0	0	0	0	0	0	0	0	HDCS
1278	ydiV	conserved hypothetical protein"	0	0	0	0	0	0	0	0	0	0	HDCS
2251	glpQ	glycerophosphoryl diester phosphodiesterase	0	0	0	0	0	0	0	0	0	0	HDCS
2770		hypothetical exported protein"	0	0	0	0	0	0	0	0	0	0	HDCS
2792	nrdE	ribonucleoside-diphosphate reductase 2 alpha	0	0	0	0	0	0	0	0	0	0	HDCS
2966		hypothetical membrane protein"	0	0	0	0	0	0	0	0	0	0	HDCS
3103		possible aldehyde dehydrogenase"	0	0	0	0	0	0	0	0	0	0	HDCS
3587	yhjS	conserved hypothetical protein"	0	0	0	0	0	0	0	0	0	0	HDCS
0054	citA2 (dpiB2)	two-component sensor kinase"	0	0	0	0	0	0	0	0	0	0	HDCS
0396	malZ	maltodextrin glucosidase"	0	0	0	0	0	0	0	0	0	0	HDCS
0577	fepE	responsible for the production of very long (VL)	0	0	0	0	0	0	0	0	0	0	HDCS
0994		predicted bacteriophage protein (pseudogene)	0	0	0	0	0	0	0	0	0	0	HDCS
2174		hypothetical hydrolase	0	0	0	0	0	0	0	0	0	0	HDCS
2256	sseL	Type III secretion system effector protein	0	0	0	0	0	0	0	0	0	0	HDCS
3243	yhbP	conserved hypothetical protein	0	0	0	0	0	0	0	0	0	0	HDCS
1933		hypothetical bacteriophage protein"	2ORF	2ORF	2ORF	2ORF	0	0	0	2ORF	0	0	0
1945		predicted bacteriophage protein"	0	0	0	0	1	0	0	0	0	0	0
2794	proV	glycine betaine/l-proline transport ATP-binding	0	0	0	0	0	0	0	2ORF	0	0	0
0293		transposase (fragment)"	0	0	0	0	0	0	0	0	0	0	0
0708		hypothetical glycosyl transferase"	0	0	0	0	0	0	2ORF	0	0	0	0
0324	leuC2	3-isopropylmalate dehydratase large subunit 2 (ec	lateSTOP	0	lateSTOP	lateSTOP	lateSTOP	lateSTOP	lateSTOP	lateSTOP	0	lateSTOP	lateSTOP
0677	ybfE	conserved hypothetical protein	lateSTOP	lateSTOP	lateSTOP	lateSTOP	0	0	0	0	0	0	0
1033	pipD	hypothetical secreted peptidase	0	0	0	0	0	0	HDCS	0	0	0	0
1315	orf48	hypothetical amino acid permease	0	0	0	0	0	0	0	0	0	0	lateSTOP
1512	yddE	conserved hypothetical protein	0	0	0	lateSTOP	0	0	0	0	0	0	0
2898	ygbI	DeoR-family trancriptional regulator	0	0	0	0	0	0	0	0	0	0	Del
3608	tag	3-methyladenine DNA glycosylase I	0	0	0	0	lateSTOP	0	0	0	0	0	0
3655		hypothetical lipoprotein	0	0	0	0	lateSTOP	0	0	0	0	0	0
3663		probable glucarate transporter	2ORF	2ORF	2ORF	2ORF	0	2ORF	2ORF	2ORF	0	0	2ORF
3695	radC	hypothetical DNA repair protein	0	0	0	0	0	0	0	diff START	0	0	0
3990		hypothetical exported protein	0	0	0	0	0	0	0	0	0	0	0
4231	adiC	Arginine-Agmatine antiporter	0	0	lateSTOP	0	0	0	0	0	0	0	0
4362	iolD	Myo-inositol metabolism	0	0	0	0	lateSTOP	0	0	0	0	0	0
	HDCS in typhi
	HDCS in Paratphi A
