# Supplementary material for: Evolution of Salmonella enterica serotype Typhimurium driven by anthropogenic selection and niche adaptation
Source: PLoS Genet. 2020 Jun 8;16(6):e1008850. doi: 10.1371/journal.pgen.1008850 (PMC7302871; doi:10.1371/journal.pgen.1008850)
Supplement: S7 Table — (XLSX) [file pgen.1008850.s012.xlsx]

## Sheet: Sheet1
Uberstrain	Name	Silo	Data Source	Barcode	Source Niche	Source Type	Source Details	Collection Year	Collection Month	Collection Day	Collection Time	Continent	Country	Region	District	City	Post Code	Latitude	Longitude	Serovar	Subspecies	Disease	Antigenic Formulas	Lab Contact	Phage Type	Comment	Bio Project ID	Project ID	Sample ID	Secondary Sample ID	Date Entered	Release Date	ST	HC0 (indistinguishable)	HC2	HC5	HC10	HC20	HC50	HC100	HC200	HC400	HC900 (ceBG)	HC2000 (Super-lineage)	HC2600	HC2850 (subsp.)
SAL_AA7055AA	PNUSAS000600	PHE	SRR2183036;ILLUMINA;Paired;;SRX1164322;473349200;230	SAL_AA7055AA	Human	Human	Age: 50-59; Stool	2015	6			North America	United States							I 4	[5]	12:I:-				Center for Diease Control and Prevention - Enteric Diseases Laboratory Branch (US)			PRJNA230403	SRP040281	SAMN03940861	SRS1045115	2015-08-26	2015-08-25	11184	11184	5544	6	2	2	2	2	2	2	2	2	2	2
SAL_AA7401AA	2011-60-170-1	PHE	ERR769342;ILLUMINA;Paired;200;ERX712641;1233185120;95	SAL_AA7401AA	Livestock	Swine	Sus scrofa domesticus; Faeces	2011	1			Europe	Denmark							Typhimurium (Predicted)				Technical University of DenmarkÔøΩ			PRJEB8647	ERP009669	SAMEA3269005	ERS664937	2015-08-26	2015-02-26	39358	39358	39358	39358	39358	39358	2	2	2	2	2	2	2	2
SAL_AA7420AA	2011-60-783-1	PHE	ERR769323;ILLUMINA;Paired;200;ERX712622;1375935160;95	SAL_AA7420AA	Livestock	Swine	Sus scrofa domesticus; Faeces	2011	1			Europe	Denmark							Typhimurium (Predicted)				Technical University of DenmarkÔøΩ			PRJEB8647	ERP009669	SAMEA3268986	ERS664918	2015-08-26	2015-02-26	39339	39339	39339	39339	39339	39339	269	2	2	2	2	2	2	2
SAL_AA7423AA	2011-60-757-1	PHE	ERR769320;ILLUMINA;Paired;200;ERX712619;807343440;95	SAL_AA7423AA	Livestock	Swine	Sus scrofa domesticus; Faeces	2011	1			Europe	Denmark							Typhimurium				Justus Liebig University Giessen			PRJEB8647	ERP009669	SAMEA3268983	ERS664915	2015-08-26	2015-02-26	39336	39336	39336	39336	6794	2	2	2	2	2	2	2	2	2
SAL_AA7427AA	2011-60-539-1	PHE	ERR769316;ILLUMINA;Paired;200;ERX712615;628588400;95	SAL_AA7427AA	Livestock	Swine	Sus scrofa domesticus; Faeces	2011	1			Europe	Denmark							Typhimurium				Technical University of DenmarkÔøΩ			PRJEB8647	ERP009669	SAMEA3268979	ERS664911	2015-08-26	2015-02-26	39332	39332	39332	39332	2	2	2	2	2	2	2	2	2	2
SAL_AA7432AA	2011-60-344-1	PHE	ERR769311;ILLUMINA;Paired;200;ERX712610;998325360;95	SAL_AA7432AA	Livestock	Swine	Sus scrofa domesticus; Faeces	2011	1			Europe	Denmark							Typhimurium (Predicted)				Technical University of Denmark			PRJEB8647	ERP009669	SAMEA3268974	ERS664906	2015-08-26	2015-02-26	39327	39327	39327	39327	2	2	2	2	2	2	2	2	2	2
SAL_AA7439AA	2011-60-312-1	PHE	ERR769304;ILLUMINA;Paired;200;ERX712603;1032170060;95	SAL_AA7439AA	Livestock	Swine	Sus scrofa domesticus; Faeces	2011	1			Europe	Denmark							Typhimurium				Justus Liebig University Giessen			PRJEB8647	ERP009669	SAMEA3268967	ERS664899	2015-08-26	2015-02-26	39320	39320	39320	29153	29153	2	2	2	2	2	2	2	2	2
SAL_AA7614AA	CT49/2	PHE	ERR715591;ILLUMINA;Paired;232;ERX659513;542600586;99	SAL_AA7614AA																Typhimurium (Predicted)				The Wellcome Trust Sanger Institute			PRJEB1397	ERP002199	SAMEA2708432	ERS529987	2015-08-26	2015-01-29	39194	39194	39194	27077	27077	2	2	2	2	2	2	2	2	2
SAL_AA8081AA	2605	PHE	ERR702387;ILLUMINA;Paired;234;ERX646650;337764568;92	SAL_AA8081AA																Typhimurium (Predicted)				The Wellcome Trust Sanger Institute			PRJEB1397	ERP002199	SAMEA2708397	ERS529952	2015-08-26	2015-01-29	38891	38891	38891	38880	2	2	2	2	2	2	2	2	2	2
SAL_AA8097AA	73_H_243	PHE	ERR702371;ILLUMINA;Paired;234;ERX646634;319739952;93	SAL_AA8097AA																Typhimurium (Predicted)				The Wellcome Trust Sanger Institute			PRJEB1397	ERP002199	SAMEA2708381	ERS529936	2015-08-26	2015-01-29	38878	38878	38878	38878	38878	2	2	2	2	2	2	2	2	2
SAL_AA9571AA	ST43	PHE	ERR460147;ILLUMINA;Paired;250;ERX426488;471841722;99	SAL_AA9571AA																Paratyphi B	I			The Wellcome Trust Sanger Institute			PRJEB2856	ERP001175	SAMEA2258639	ERS372348	2015-08-26	2014-05-14	37825	37825	37825	37825	2	2	2	2	2	2	2	2	2	2
SAL_AA9825AA	UY042-sc-2013-10-08T14:24:31Z-1711489	PHE	ERR405528;ILLUMINA;Paired;198;ERX371889;257083000;100	ERR405433;ILLUMINA;Paired;197;ERX371794;248139000;100	SAL_AA9825AA																Typhimurium (Predicted)				The Wellcome Trust Sanger Institute			PRJEB4649	ERP003958	SAMEA2201676	ERS354079	2015-08-26	2014-05-14	37598	37598	37598	37598	35743	269	269	2	2	2	2	2	2	2
SAL_AA9900AA	UY095-sc-2013-10-08T14:25:30Z-1711542	PHE	ERR405581;ILLUMINA;Paired;198;ERX371942;221866600;100	ERR405486;ILLUMINA;Paired;197;ERX371847;214085600;100	SAL_AA9900AA																Typhimurium (Predicted)				The Wellcome Trust Sanger Institute			PRJEB4649	ERP003958	SAMEA2201729	ERS354132	2015-08-26	2014-05-14	37531	37531	37531	37531	37531	37531	269	2	2	2	2	2	2	2
SAL_AA9901AA	UY094-sc-2013-10-08T14:25:29Z-1711541	PHE	ERR405485;ILLUMINA;Paired;197;ERX371846;226163400;100	ERR405580;ILLUMINA;Paired;198;ERX371941;234027600;100	SAL_AA9901AA																Typhimurium (Predicted)				The Wellcome Trust Sanger Institute			PRJEB4649	ERP003958	SAMEA2201728	ERS354131	2015-08-26	2014-05-14	37530	37530	37530	37530	37530	269	269	2	2	2	2	2	2	2
SAL_AA9913AA	UY093-sc-2013-10-08T14:25:28Z-1711540	PHE	ERR405484;ILLUMINA;Paired;197;ERX371845;192633400;100	ERR405579;ILLUMINA;Paired;198;ERX371940;198765400;100	SAL_AA9913AA																Typhimurium (Predicted)				The Wellcome Trust Sanger Institute			PRJEB4649	ERP003958	SAMEA2201727	ERS354130	2015-08-26	2014-05-14	37518	37518	37518	37518	37518	269	269	2	2	2	2	2	2	2
SAL_AA9915AA	UY091-sc-2013-10-08T14:25:25Z-1711538	PHE	ERR405577;ILLUMINA;Paired;198;ERX371938;187012800;100	ERR405482;ILLUMINA;Paired;197;ERX371843;181149000;100	SAL_AA9915AA																Typhimurium (Predicted)				The Wellcome Trust Sanger Institute			PRJEB4649	ERP003958	SAMEA2201725	ERS354128	2015-08-26	2014-05-14	37516	37516	37516	37516	37516	37516	269	2	2	2	2	2	2	2
SAL_BA1909AA	ADRDL-14-19262	PHE	SRR2102479;ILLUMINA;Paired;500;SRX1097083;464099588;226	SAL_BA1909AA	Livestock	Bovine	bovine intestine; Bos taurus	2014	10			North America	United States	Minnesota						Typhimurium	I			Food and Drug Administration - Center for Food Safety and Applied Nutrition (US)			PRJNA280335	SRP059853	SAMN03734320	SRS992374	2015-08-27	2015-07-14	36034	36034	36034	271	269	269	269	2	2	2	2	2	2	2
SAL_BA2249AA	STM1420_11-sc-2013-07-03T16:37:21Z-1658492	PHE	ERR350364;ILLUMINA;Paired;250;ERX323200;297971800;100	ERR350294;ILLUMINA;Paired;250;ERX323130;292723800;100	SAL_BA2249AA																Typhimurium	I			The Wellcome Trust Sanger Institute			PRJEB4240	ERP003509	SAMEA2156708	ERS322824	2015-08-27	2014-03-13	35745	35745	35745	35745	35745	35745	269	2	2	2	2	2	2	2
SAL_BA2251AA	STM159_12-sc-2013-07-03T16:37:17Z-1658489	PHE	ERR350293;ILLUMINA;Paired;250;ERX323129;348038600;100	ERR350363;ILLUMINA;Paired;250;ERX323199;354355200;100	SAL_BA2251AA																Typhimurium	I			The Wellcome Trust Sanger Institute			PRJEB4240	ERP003509	SAMEA2143221	ERS322821	2015-08-27	2014-03-13	35743	35743	35743	35743	35743	269	269	2	2	2	2	2	2	2
SAL_BA2279AA	STM8374_69-sc-2013-07-03T16:36:53Z-1658467	PHE	ERR350276;ILLUMINA;Paired;250;ERX323112;311438000;100	ERR350346;ILLUMINA;Paired;250;ERX323182;315016200;100	SAL_BA2279AA																Typhimurium	I			The Wellcome Trust Sanger Institute			PRJEB4240	ERP003509	SAMEA2153404	ERS322799	2015-08-27	2014-03-13	35716	35716	35716	35716	35599	269	269	2	2	2	2	2	2	2
SAL_BA2287AA	STM528_08-sc-2013-07-03T16:36:45Z-1658459	PHE	ERR350341;ILLUMINA;Paired;250;ERX323177;350288400;100	ERR350271;ILLUMINA;Paired;250;ERX323107;343750200;100	SAL_BA2287AA																Typhimurium	I			The Wellcome Trust Sanger Institute			PRJEB4240	ERP003509	SAMEA2144839	ERS322791	2015-08-27	2014-03-13	35708	35708	35708	35708	35697	269	269	2	2	2	2	2	2	2
SAL_BA2289AA	STM453_09-sc-2013-07-03T16:36:42Z-1658456	PHE	ERR350269;ILLUMINA;Paired;250;ERX323105;320216600;100	ERR350339;ILLUMINA;Paired;250;ERX323175;325547600;100	SAL_BA2289AA																Typhimurium	I			The Wellcome Trust Sanger Institute			PRJEB4240	ERP003509	SAMEA2143420	ERS322788	2015-08-27	2014-03-13	35706	35706	35605	35605	35605	269	269	2	2	2	2	2	2	2
SAL_BA2299AA	STM2221_10-sc-2013-07-03T16:36:31Z-1658447	PHE	ERR350262;ILLUMINA;Paired;250;ERX323098;326844400;100	ERR350332;ILLUMINA;Paired;250;ERX323168;332101400;100	SAL_BA2299AA																Typhimurium	I			The Wellcome Trust Sanger Institute			PRJEB4240	ERP003509	SAMEA2143308	ERS322779	2015-08-27	2014-03-13	35697	35697	35697	35697	35697	269	269	2	2	2	2	2	2	2
SAL_BA2303AA	STM2048_98-sc-2013-07-03T16:36:28Z-1658444	PHE	ERR350259;ILLUMINA;Paired;250;ERX323095;310266800;100	ERR350329;ILLUMINA;Paired;250;ERX323165;314533800;100	SAL_BA2303AA																Typhimurium	I			The Wellcome Trust Sanger Institute			PRJEB4240	ERP003509	SAMEA2151200	ERS322776	2015-08-27	2014-03-13	35693	35693	35693	35693	35693	269	269	2	2	2	2	2	2	2
SAL_BA2305AA	STM200_10-sc-2013-07-03T16:36:27Z-1658443	PHE	ERR350328;ILLUMINA;Paired;250;ERX323164;375778200;100	ERR350258;ILLUMINA;Paired;250;ERX323094;369883400;100	SAL_BA2305AA																Typhimurium	I			The Wellcome Trust Sanger Institute			PRJEB4240	ERP003509	SAMEA2148701	ERS322775	2015-08-27	2014-03-13	35691	35691	35621	35621	35621	269	269	2	2	2	2	2	2	2
SAL_BA2313AA	STM1564_07-sc-2013-07-03T16:36:22Z-1658439	PHE	ERR350254;ILLUMINA;Paired;250;ERX323090;299576200;100	ERR350324;ILLUMINA;Paired;250;ERX323160;305151400;100	SAL_BA2313AA																Typhimurium	I			The Wellcome Trust Sanger Institute			PRJEB4240	ERP003509	SAMEA2149180	ERS322771	2015-08-27	2014-03-13	35684	35684	35684	35684	35610	269	269	2	2	2	2	2	2	2
SAL_BA2323AA	STM1290_03-sc-2013-07-03T16:36:13Z-1658431	PHE	ERR350249;ILLUMINA;Paired;250;ERX323085;311610400;100	ERR350319;ILLUMINA;Paired;250;ERX323155;317905600;100	SAL_BA2323AA																Typhimurium	I			The Wellcome Trust Sanger Institute			PRJEB4240	ERP003509	SAMEA2157739	ERS322763	2015-08-27	2014-03-13	35674	35674	35674	35674	35674	269	269	2	2	2	2	2	2	2
SAL_BA2324AA	STM1208_12-sc-2013-07-03T16:36:12Z-1658430	PHE	ERR350248;ILLUMINA;Paired;250;ERX323084;377840800;100	ERR350318;ILLUMINA;Paired;250;ERX323154;382718800;100	SAL_BA2324AA																Typhimurium	I			The Wellcome Trust Sanger Institute			PRJEB4240	ERP003509	SAMEA2146412	ERS322762	2015-08-27	2014-03-13	35673	35673	35673	35609	35609	269	269	2	2	2	2	2	2	2
SAL_BA2330AA	STM339_08-sc-2013-07-03T16:37:52Z-1658522	PHE	ERR350437;ILLUMINA;Paired;250;ERX323273;291042600;100	ERR350411;ILLUMINA;Paired;250;ERX323247;296869400;100	SAL_BA2330AA																Typhimurium	I			The Wellcome Trust Sanger Institute			PRJEB4240	ERP003509	SAMEA2144448	ERS322854	2015-08-27	2014-03-13	35668	35668	35668	35668	35668	269	269	2	2	2	2	2	2	2
SAL_BA2334AA	STM910_12-sc-2013-07-03T16:37:46Z-1658516	PHE	ERR350435;ILLUMINA;Paired;250;ERX323271;308127200;100	ERR350409;ILLUMINA;Paired;250;ERX323245;314150600;100	SAL_BA2334AA																Typhimurium	I			The Wellcome Trust Sanger Institute			PRJEB4240	ERP003509	SAMEA2163142	ERS322848	2015-08-27	2014-03-13	35666	35666	35666	35666	35609	269	269	2	2	2	2	2	2	2
SAL_BA2337AA	STM616_91-sc-2013-07-03T16:37:41Z-1658511	PHE	ERR350407;ILLUMINA;Paired;250;ERX323243;324051400;100	ERR350433;ILLUMINA;Paired;250;ERX323269;318807600;100	SAL_BA2337AA																Typhimurium	I			The Wellcome Trust Sanger Institute			PRJEB4240	ERP003509	SAMEA2150475	ERS322843	2015-08-27	2014-03-13	35664	35664	35664	35664	35599	269	269	2	2	2	2	2	2	2
SAL_BA2371AA	STM2346_10-sc-2013-07-03T16:36:34Z-1658449	PHE	ERR350390;ILLUMINA;Paired;250;ERX323226;310974600;100	ERR350416;ILLUMINA;Paired;250;ERX323252;306112400;100	SAL_BA2371AA																Typhimurium	I			The Wellcome Trust Sanger Institute			PRJEB4240	ERP003509	SAMEA2157434	ERS322781	2015-08-27	2014-03-13	35646	35646	35605	35605	35605	269	269	2	2	2	2	2	2	2
SAL_BA2373AA	STM153_07-sc-2013-07-03T16:36:21Z-1658438	PHE	ERR350389;ILLUMINA;Paired;250;ERX323225;171619200;100	ERR350415;ILLUMINA;Paired;250;ERX323251;169118600;100	SAL_BA2373AA																Typhimurium	I			The Wellcome Trust Sanger Institute			PRJEB4240	ERP003509	SAMEA2153574	ERS322770	2015-08-27	2014-03-13	35644	35644	35644	35644	35644	269	269	2	2	2	2	2	2	2
SAL_BA2377AA	STM1379_11-sc-2013-07-03T16:36:18Z-1658435	PHE	ERR350413;ILLUMINA;Paired;250;ERX323249;151139800;100	ERR350387;ILLUMINA;Paired;250;ERX323223;153924000;100	SAL_BA2377AA																Typhimurium	I			The Wellcome Trust Sanger Institute			PRJEB4240	ERP003509	SAMEA2156357	ERS322767	2015-08-27	2014-03-13	35641	35641	35641	35641	35621	269	269	2	2	2	2	2	2	2
SAL_BA2394AA	STM200_12-sc-2013-07-03T16:37:51Z-1658521	PHE	ERR350385;ILLUMINA;Paired;250;ERX323221;340913200;100	ERR350315;ILLUMINA;Paired;250;ERX323151;334000000;100	SAL_BA2394AA																Typhimurium	I			The Wellcome Trust Sanger Institute			PRJEB4240	ERP003509	SAMEA2158423	ERS322853	2015-08-27	2014-03-13	35627	35627	35627	35627	35627	269	269	2	2	2	2	2	2	2
SAL_BA2398AA	STM715_09-sc-2013-07-03T16:37:49Z-1658519	PHE	ERR350313;ILLUMINA;Paired;250;ERX323149;311057200;100	ERR350383;ILLUMINA;Paired;250;ERX323219;315354800;100	SAL_BA2398AA																Typhimurium	I			The Wellcome Trust Sanger Institute			PRJEB4240	ERP003509	SAMEA2162083	ERS322851	2015-08-27	2014-03-13	35623	35623	35621	35621	35621	269	269	2	2	2	2	2	2	2
SAL_BA2400AA	STM1483_09-sc-2013-07-03T16:37:47Z-1658517	PHE	ERR350312;ILLUMINA;Paired;250;ERX323148;386376200;100	ERR350382;ILLUMINA;Paired;250;ERX323218;392836800;100	SAL_BA2400AA																Typhimurium	I			The Wellcome Trust Sanger Institute			PRJEB4240	ERP003509	SAMEA2143120	ERS322849	2015-08-27	2014-03-13	35621	35621	35621	35621	35621	269	269	2	2	2	2	2	2	2
SAL_BA2402AA	STM2414_10-sc-2013-07-03T16:37:45Z-1658515	PHE	ERR350381;ILLUMINA;Paired;250;ERX323217;394979600;100	ERR350311;ILLUMINA;Paired;250;ERX323147;388798600;100	SAL_BA2402AA																Typhimurium	I			The Wellcome Trust Sanger Institute			PRJEB4240	ERP003509	SAMEA2143079	ERS322847	2015-08-27	2014-03-13	35619	35619	35619	35609	35609	269	269	2	2	2	2	2	2	2
SAL_BA2404AA	STM1290_08-sc-2013-07-03T16:37:43Z-1658513	PHE	ERR350310;ILLUMINA;Paired;250;ERX323146;341873000;100	ERR350380;ILLUMINA;Paired;250;ERX323216;347152400;100	SAL_BA2404AA																Typhimurium	I			The Wellcome Trust Sanger Institute			PRJEB4240	ERP003509	SAMEA2151518	ERS322845	2015-08-27	2014-03-13	35617	35617	35617	35599	35599	269	269	2	2	2	2	2	2	2
SAL_BA2406AA	STM712_11-sc-2013-07-03T16:37:42Z-1658512	PHE	ERR350379;ILLUMINA;Paired;250;ERX323215;343393600;100	ERR350309;ILLUMINA;Paired;250;ERX323145;337237400;100	SAL_BA2406AA																Typhimurium	I			The Wellcome Trust Sanger Institute			PRJEB4240	ERP003509	SAMEA2142666	ERS322844	2015-08-27	2014-03-13	35615	35615	35615	35615	35610	269	269	2	2	2	2	2	2	2
SAL_BA2408AA	STM411_13-sc-2013-07-03T16:37:40Z-1658510	PHE	ERR350378;ILLUMINA;Paired;250;ERX323214;315457000;100	ERR350308;ILLUMINA;Paired;250;ERX323144;311122600;100	SAL_BA2408AA																Typhimurium	I			The Wellcome Trust Sanger Institute			PRJEB4240	ERP003509	SAMEA2159086	ERS322842	2015-08-27	2014-03-13	35613	35613	35613	35609	35609	269	269	2	2	2	2	2	2	2
SAL_BA2410AA	STM2848_98-sc-2013-07-03T16:37:37Z-1658508	PHE	ERR350377;ILLUMINA;Paired;250;ERX323213;340713600;100	ERR350307;ILLUMINA;Paired;250;ERX323143;335064200;100	SAL_BA2410AA																Typhimurium	I			The Wellcome Trust Sanger Institute			PRJEB4240	ERP003509	SAMEA2143363	ERS322840	2015-08-27	2014-03-13	35612	35612	35612	35612	35601	269	269	2	2	2	2	2	2	2
SAL_BA2412AA	STM2220_05-sc-2013-07-03T16:37:36Z-1658507	PHE	ERR350306;ILLUMINA;Paired;250;ERX323142;327553400;100	ERR350376;ILLUMINA;Paired;250;ERX323212;332539200;100	SAL_BA2412AA																Typhimurium	I			The Wellcome Trust Sanger Institute			PRJEB4240	ERP003509	SAMEA2143733	ERS322839	2015-08-27	2014-03-13	35610	35610	35610	35610	35610	269	269	2	2	2	2	2	2	2
SAL_BA2414AA	STM211_11-sc-2013-07-03T16:37:35Z-1658506	PHE	ERR350375;ILLUMINA;Paired;250;ERX323211;357509200;100	ERR350305;ILLUMINA;Paired;250;ERX323141;351891400;100	SAL_BA2414AA																Typhimurium	I			The Wellcome Trust Sanger Institute			PRJEB4240	ERP003509	SAMEA2145760	ERS322838	2015-08-27	2014-03-13	35609	35609	35609	35609	35609	269	269	2	2	2	2	2	2	2
SAL_BA2416AA	STM2059_09-sc-2013-07-03T16:37:34Z-1658505	PHE	ERR350374;ILLUMINA;Paired;250;ERX323210;418720000;100	ERR350304;ILLUMINA;Paired;250;ERX323140;410601000;100	SAL_BA2416AA																Typhimurium	I			The Wellcome Trust Sanger Institute			PRJEB4240	ERP003509	SAMEA2161270	ERS322837	2015-08-27	2014-03-13	35607	35607	35607	35607	35607	35607	269	2	2	2	2	2	2	2
SAL_BA2418AA	STM2014_09-sc-2013-07-03T16:37:33Z-1658504	PHE	ERR350373;ILLUMINA;Paired;250;ERX323209;384216600;100	ERR350303;ILLUMINA;Paired;250;ERX323139;376730800;100	SAL_BA2418AA																Typhimurium	I			The Wellcome Trust Sanger Institute			PRJEB4240	ERP003509	SAMEA2154610	ERS322836	2015-08-27	2014-03-13	35605	35605	35605	35605	35605	269	269	2	2	2	2	2	2	2
SAL_BA2422AA	STM1925_00-sc-2013-07-03T16:37:31Z-1658502	PHE	ERR350301;ILLUMINA;Paired;250;ERX323137;341929600;100	ERR350371;ILLUMINA;Paired;250;ERX323207;347513000;100	SAL_BA2422AA																Typhimurium	I			The Wellcome Trust Sanger Institute			PRJEB4240	ERP003509	SAMEA2150446	ERS322834	2015-08-27	2014-03-13	35601	35601	35601	35601	35601	269	269	2	2	2	2	2	2	2
SAL_BA2424AA	STM1505_90-sc-2013-07-03T16:37:29Z-1658500	PHE	ERR350370;ILLUMINA;Paired;250;ERX323206;360816600;100	ERR350300;ILLUMINA;Paired;250;ERX323136;355127600;100	SAL_BA2424AA																Typhimurium	I			The Wellcome Trust Sanger Institute			PRJEB4240	ERP003509	SAMEA2148284	ERS322832	2015-08-27	2014-03-13	35599	35599	35599	35599	35599	269	269	2	2	2	2	2	2	2
SAL_BA3378AA	PNUSAS000401	PHE	SRR2058194;ILLUMINA;Paired;500;SRX1054977;348682710;183	SAL_BA3378AA	Human	Human	Stool; Age: 20-29	2014	9			North America	United States							Typhimurium				Centers for Disease Control and Prevention			PRJNA230403	SRP040281	SAMN03761783	SRS957667	2015-08-27	2015-06-10	34849	34849	6	6	2	2	2	2	2	2	2	2	2	2
SAL_BA4702AA	CFSAN005663	PHE	SRR961984;ILLUMINA;Paired;500;SRX343053;504141364;226	SAL_BA4702AA	Livestock	Bovine	Ground Beef	2009	12			North America	United States	Washington						Typhimurium (Predicted)				Food and Drug Administration - Center for Food Safety and Applied Nutrition (US)			PRJNA186035	SRP018785	SAMN02265290	SRS475636	2015-08-27	2013-09-03	33954	33954	271	271	269	269	269	2	2	2	2	2	2	2
SAL_BA6587AA	10045	PHE	ERR161390;ILLUMINA;Paired;263;ERX137240;296036200;100	SAL_BA6587AA																Typhimurium	I			The Wellcome Trust Sanger Institute			PRJEB2973	ERP001359	SAMEA1486874	ERS126770	2015-08-27	2012-08-28	32501	32501	32501	32501	32501	9763	2	2	2	2	2	2	2	2
SAL_BA7189AA	H100120548	PHE	ERR062887;ILLUMINA;Paired;209;ERX040861;962478750;75	SAL_BA7189AA																Typhimurium				The Wellcome Trust Sanger Institute			PRJEB2438	ERP000537	SAMEA1027247	ERS037914	2015-08-27	2012-04-15	98082	98082	98082	98082	98082	2	2	2	2	2	2	2	2	2
SAL_BA7197AA	H07 246 0339	PHE	ERR062883;ILLUMINA;Paired;209;ERX040857;1499464500;75	SAL_BA7197AA																Typhimurium				The Wellcome Trust Sanger Institute			PRJEB2438	ERP000537	SAMEA1027169	ERS037910	2015-08-27	2012-04-15	98054	98054	98054	98054	84985	2	2	2	2	2	2	2	2	2
SAL_BA7246AA	2117/2	PHE	ERR056928;ILLUMINA;Paired;216;ERX034772;556982700;75	SAL_BA7246AA																Typhimurium				The Wellcome Trust Sanger Institute			PRJEB2438	ERP000537	SAMEA1027160	ERS037957	2015-08-27	2012-04-15	31980	31980	31980	25344	2	2	2	2	2	2	2	2	2	2
SAL_BA7673AA	94070	PHE	SRR1970190;ILLUMINA;Paired;;SRX992006;335437542;99	SAL_BA7673AA	Human	Human	Human; Homo sapiens	2015	3			Europe	United Kingdom			London		51.5	0	Typhimurium	I			Public Health England - Gastrointestinal Bacteria Reference Unit			PRJNA248792	SRP042645	SAMN03480266	SRS906900	2015-08-27	2015-04-13	31715	31715	31715	1471	1471	269	269	2	2	2	2	2	2	2
SAL_BA7748AA	63688	PHE	SRR1970152;ILLUMINA;Paired;;SRX991968;262998846;99	SAL_BA7748AA	Human	Human	Human; Homo sapiens	2014	10			Europe	United Kingdom	England						Typhimurium	I			Public Health England - Gastrointestinal Bacteria Reference Unit			PRJNA248792	SRP042645	SAMN03480228	SRS906734	2015-08-27	2015-04-13	31677	31677	25132	25132	25132	2	2	2	2	2	2	2	2	2
SAL_BA7780AA	37032	PHE	SRR1970136;ILLUMINA;Paired;;SRX991952;335805240;95	SAL_BA7780AA	Human	Human	Human; Homo sapiens	2014	8			Europe	United Kingdom							Typhimurium	I			Public Health England - Gastrointestinal Bacteria Reference Unit			PRJNA248792	SRP042645	SAMN03480212	SRS906713	2015-08-27	2015-04-13	31660	24998	24998	24998	2	2	2	2	2	2	2	2	2	2
SAL_BA7812AA	65012	PHE	SRR1970121;ILLUMINA;Paired;;SRX991937;337383684;99	SAL_BA7812AA	Human	Human	Human; Homo sapiens	2014	11			Europe	United Kingdom			London		51.5	0	Typhimurium	I			Public Health England - Gastrointestinal Bacteria Reference Unit			PRJNA248792	SRP042645	SAMN03480197	SRS906701	2015-08-27	2015-04-13	27877	25426	1679	1679	1471	269	269	2	2	2	2	2	2	2
SAL_BA7867AA	94240	PHE	SRR1970091;ILLUMINA;Paired;;SRX991908;251854020;99	SAL_BA7867AA	Human	Human	Human; Homo sapiens	2015	3			Europe	United Kingdom							Typhimurium	I			Public Health England - Gastrointestinal Bacteria Reference Unit			PRJNA248792	SRP042645	SAMN03480168	SRS906670	2015-08-27	2015-04-13	1590	1590	1441	1441	2	2	2	2	2	2	2	2	2	2
SAL_BA7916AA	73130	PHE	SRR1970065;ILLUMINA;Paired;;SRX991883;375445026;99	SAL_BA7916AA	Human	Human	Human; Homo sapiens	2014	12			Europe	United Kingdom	England						Typhimurium	I			Public Health England - Gastrointestinal Bacteria Reference Unit			PRJNA248792	SRP042645	SAMN03480143	SRS906651	2015-08-27	2015-04-13	25591	25423	25423	25423	25256	2	2	2	2	2	2	2	2	2
SAL_BA7970AA	7399	PHE	SRR1970037;ILLUMINA;Paired;;SRX991856;184113954;97	SAL_BA7970AA	Food	ND	ND	2014	4			Europe	United Kingdom							Typhimurium	I			Public Health England - Gastrointestinal Bacteria Reference Unit			PRJNA248792	SRP042645	SAMN03480115	SRS906626	2015-08-27	2015-04-13	31534	31534	31534	31534	31534	2	2	2	2	2	2	2	2	2
SAL_BA8052AA	31911	PHE	SRR1969998;ILLUMINA;Paired;;SRX991817;232107120;98	SAL_BA8052AA	Human	Human	Human; Homo sapiens	2014	7			Europe	United Kingdom			London		51.5	0	Typhimurium	I			Public Health England - Gastrointestinal Bacteria Reference Unit			PRJNA248792	SRP042645	SAMN03480076	SRS906617	2015-08-27	2015-04-13	29671	29671	26094	26094	2	2	2	2	2	2	2	2	2	2
SAL_BA8070AA	5894	PHE	SRR1969989;ILLUMINA;Paired;;SRX991808;287609168;94	SAL_BA8070AA	Human	Human	Human; Homo sapiens	2014	4			Europe	United Kingdom	England						Typhimurium	I			Public Health England - Gastrointestinal Bacteria Reference Unit			PRJNA248792	SRP042645	SAMN03480067	SRS906586	2015-08-27	2015-04-13	31485	31485	28195	1891	1891	269	269	2	2	2	2	2	2	2
SAL_BA8103AA	65327	PHE	SRR1969973;ILLUMINA;Paired;;SRX991792;257418400;100	SAL_BA8103AA	Human	Human	Human; Homo sapiens	2014	9			Europe	United Kingdom							Typhimurium	I			Public Health England - Gastrointestinal Bacteria Reference Unit			PRJNA248792	SRP042645	SAMN03480051	SRS906694	2015-08-27	2015-04-13	31474	31474	7744	7744	2	2	2	2	2	2	2	2	2	2
SAL_BA8193AA	31903	PHE	SRR1969930;ILLUMINA;Paired;;SRX991748;249950764;98	SAL_BA8193AA	Human	Human	Human; Homo sapiens	2014	7			Europe	United Kingdom							Typhimurium	I			Public Health England - Gastrointestinal Bacteria Reference Unit			PRJNA248792	SRP042645	SAMN03480007	SRS906540	2015-08-27	2015-04-13	31435	1679	1679	1679	1471	269	269	2	2	2	2	2	2	2
SAL_BA8315AA	45560	PHE	SRR1969870;ILLUMINA;Paired;;SRX991688;279501620;97	SAL_BA8315AA	Human	Human	Human; Homo sapiens	2014	9			Europe	United Kingdom	England						Typhimurium	I			Public Health England - Gastrointestinal Bacteria Reference Unit			PRJNA248792	SRP042645	SAMN03479947	SRS906486	2015-08-27	2015-04-13	31329	28066	1954	1891	1891	269	269	2	2	2	2	2	2	2
SAL_BA8587AA	23481	PHE	SRR1969733;ILLUMINA;Paired;;SRX991551;234354328;97	SAL_BA8587AA	Human	Human	Human; Homo sapiens	2014	6			Europe	United Kingdom							Typhimurium	I			Public Health England - Gastrointestinal Bacteria Reference Unit			PRJNA248792	SRP042645	SAMN03479809	SRS906324	2015-08-27	2015-04-13	31132	31132	31132	31132	31132	2	2	2	2	2	2	2	2	2
SAL_BA8702AA	67560	PHE	SRR1969675;ILLUMINA;Paired;;SRX991493;421992252;99	SAL_BA8702AA	Human	Human	Human; Homo sapiens	2014	11			Europe	United Kingdom	England						Typhimurium	I			Public Health England - Gastrointestinal Bacteria Reference Unit			PRJNA248792	SRP042645	SAMN03479751	SRS906258	2015-08-27	2015-04-13	31030	31030	31030	31030	12652	269	269	2	2	2	2	2	2	2
SAL_BA8814AA	NY_BAC0600005278	PHE	SRR949413;ILLUMINA;Paired;500;SRX332892;819054950;205	SAL_BA8814AA	Livestock	Swine	PORK CHOPS	2006	7			North America	United States	New York	Rensselaer County	Unresolved				Typhimurium	I			Food and Drug Administration - Center for Food Safety and Applied Nutrition (US)			PRJNA183850	SRP028607	SAMN01902273	SRS468322	2015-08-27	2013-08-08	30936	30936	30936	30936	30936	30936	3610	2	2	2	2	2	2	2
SAL_BA9146AA	32551	PHE	SRR1969511;ILLUMINA;Paired;;SRX991329;283627092;98	SAL_BA9146AA	Human	Human	Human; Homo sapiens	2014	7			Europe	United Kingdom			London		51.5	0	Typhimurium	I			Public Health England - Gastrointestinal Bacteria Reference Unit			PRJNA248792	SRP042645	SAMN03479588	SRS906139	2015-08-27	2015-04-13	30681	30681	30681	393	393	269	269	2	2	2	2	2	2	2
SAL_BA9152AA	63675	PHE	SRR1969508;ILLUMINA;Paired;;SRX991326;205797200;100	SAL_BA9152AA	Human	Human	Human; Homo sapiens	2014	10			Europe	United Kingdom	England						Typhimurium	I			Public Health England - Gastrointestinal Bacteria Reference Unit			PRJNA248792	SRP042645	SAMN03479585	SRS906061	2015-08-27	2015-04-13	30675	30675	25132	25132	25132	2	2	2	2	2	2	2	2	2
SAL_BA9206AA	6477	PHE	SRR1969481;ILLUMINA;Paired;;SRX991299;152088240;94	SAL_BA9206AA	Human	Human	Human; Homo sapiens	2014	4			Europe	United Kingdom			London		51.5		Typhimurium (Predicted)	I			Public Health England - Gastrointestinal Bacteria Reference Unit			PRJNA248792	SRP042645	SAMN03479558	SRS906049	2015-08-27	2015-04-13	30629	30629	30629	30629	269	269	269	2	2	2	2	2	2	2
SAL_BA9231AA	95028	PHE	SRR1969468;ILLUMINA;Paired;;SRX991286;184408290;99	SAL_BA9231AA	Human	Human	Human; Homo sapiens	2015	3			Europe	United Kingdom	England						Typhimurium	I			Public Health England - Gastrointestinal Bacteria Reference Unit			PRJNA248792	SRP042645	SAMN03479545	SRS906050	2015-08-27	2015-04-13	30605	30605	30605	30476	2	2	2	2	2	2	2	2	2	2
SAL_BA9336AA	72269	PHE	SRR1969401;ILLUMINA;Paired;;SRX991219;320757426;99	SAL_BA9336AA	Human	Human	Human; Homo sapiens	2014	12			Europe	United Kingdom	England						Typhimurium	I			Public Health England - Gastrointestinal Bacteria Reference Unit			PRJNA248792	SRP042645	SAMN03479478	SRS905993	2015-08-27	2015-04-12	25591	25423	25423	25423	25256	2	2	2	2	2	2	2	2	2
SAL_BA9343AA	13805	PHE	SRR1969394;ILLUMINA;Paired;;SRX991212;350906880;96	SAL_BA9343AA	Human	Human	Human; Homo sapiens	2014	5			Europe	United Kingdom	England						Typhimurium	I			Public Health England - Gastrointestinal Bacteria Reference Unit			PRJNA248792	SRP042645	SAMN03479471	SRS906079	2015-08-27	2015-04-12	30514	30514	30514	30514	30514	2	2	2	2	2	2	2	2	2
SAL_BA9348AA	85699	PHE	SRR1969389;ILLUMINA;Paired;;SRX991207;326555404;98	SAL_BA9348AA	Human	Human	Human; Homo sapiens	2014	8			Europe	United Kingdom							Enteritidis	I			Public Health England - Gastrointestinal Bacteria Reference Unit			PRJNA248792	SRP042645	SAMN03479466	SRS906080	2015-08-27	2015-04-12	30509	30509	30509	30509	30509	30509	2	2	2	2	2	2	2	2
SAL_BA9385AA	63686	PHE	SRR1969352;ILLUMINA;Paired;;SRX991170;294119496;99	SAL_BA9385AA	Human	Human	Human; Homo sapiens	2014	10			Europe	United Kingdom			London		51.5	0	Typhimurium	I			Public Health England - Gastrointestinal Bacteria Reference Unit			PRJNA248792	SRP042645	SAMN03479429	SRS905921	2015-08-27	2015-04-12	30476	30476	30476	30476	2	2	2	2	2	2	2	2	2	2
SAL_BA9506AA	24981	PHE	SRR1969251;ILLUMINA;Paired;;SRX991069;196966260;97	SAL_BA9506AA	Human	Human	Human; Homo sapiens	2014	7			Europe	United Kingdom	Wales						Typhimurium	I			Public Health England - Gastrointestinal Bacteria Reference Unit			PRJNA248792	SRP042645	SAMN03479328	SRS905937	2015-08-27	2015-04-12	30378	30378	30378	30378	1499	269	269	2	2	2	2	2	2	2
SAL_BA9574AA	63035	PHE	SRR1969217;ILLUMINA;Paired;;SRX991035;393477696;96	SAL_BA9574AA	Human	Human	Human; Homo sapiens	2014	10			Europe	United Kingdom	England						Typhimurium	I			Public Health England - Gastrointestinal Bacteria Reference Unit			PRJNA248792	SRP042645	SAMN03479294	SRS905790	2015-08-27	2015-04-12	25261	25261	25261	302	2	2	2	2	2	2	2	2	2	2
SAL_BA9634AA	41965	PHE	SRR1969185;ILLUMINA;Paired;;SRX991003;245276320;95	SAL_BA9634AA	Human	Human	Human; Homo sapiens	2014	8			Europe	United Kingdom	England						Typhimurium	I			Public Health England - Gastrointestinal Bacteria Reference Unit			PRJNA248792	SRP042645	SAMN03479262	SRS905892	2015-08-27	2015-04-12	30271	30271	30271	21206	2	2	2	2	2	2	2	2	2	2
SAL_BA9671AA	94093	PHE	SRR1969167;ILLUMINA;Paired;;SRX990985;322788510;99	SAL_BA9671AA	Human	Human	Human; Homo sapiens	2015	3			Europe	United Kingdom	England						Typhimurium	I			Public Health England - Gastrointestinal Bacteria Reference Unit			PRJNA248792	SRP042645	SAMN03479244	SRS905854	2015-08-27	2015-04-12	30244	30244	30244	30244	30244	2	2	2	2	2	2	2	2	2
SAL_BA9694AA	63002	PHE	SRR1969156;ILLUMINA;Paired;;SRX990974;369362032;97	SAL_BA9694AA	Human	Human	Human; Homo sapiens	2014	10			Europe	United Kingdom	England						Typhimurium	I			Public Health England - Gastrointestinal Bacteria Reference Unit			PRJNA248792	SRP042645	SAMN03479233	SRS905734	2015-08-27	2015-04-12	30227	30227	1679	1679	1471	269	269	2	2	2	2	2	2	2
SAL_BA9768AA	39497	PHE	SRR1969119;ILLUMINA;Paired;;SRX990937;291458304;96	SAL_BA9768AA	Human	Human	Human; Homo sapiens	2014	8			Europe	United Kingdom	Wales						Typhimurium	I			Public Health England - Gastrointestinal Bacteria Reference Unit			PRJNA248792	SRP042645	SAMN03479196	SRS905702	2015-08-27	2015-04-12	30173	30173	30173	30173	4984	2	2	2	2	2	2	2	2	2
SAL_BA9852AA	73212	PHE	SRR1969059;ILLUMINA;Paired;;SRX990895;277324000;100	SAL_BA9852AA	Human	Human	Human; Homo sapiens	2014	12			Europe	United Kingdom	England						Typhimurium	I			Public Health England - Gastrointestinal Bacteria Reference Unit			PRJNA248792	SRP042645	SAMN03479154	SRS905635	2015-08-27	2015-04-12	30111	25423	25423	25423	25256	2	2	2	2	2	2	2	2	2
SAL_BA9931AA	31946	PHE	SRR1969019;ILLUMINA;Paired;;SRX990856;182868000;98	SAL_BA9931AA	Human	Human	Human; Homo sapiens	2014	7			Europe	United Kingdom							Typhimurium	I			Public Health England - Gastrointestinal Bacteria Reference Unit			PRJNA248792	SRP042645	SAMN03479116	SRS905595	2015-08-27	2015-04-12	30049	1679	1679	1679	1471	269	269	2	2	2	2	2	2	2
SAL_CA0057AA	7422	PHE	SRR1968954;ILLUMINA;Paired;;SRX990791;175015160;97	SAL_CA0057AA	Food	ND	ND	2014	4			Europe	United Kingdom							Typhimurium	I			Public Health England - Gastrointestinal Bacteria Reference Unit			PRJNA248792	SRP042645	SAMN03479052	SRS905641	2015-08-27	2015-04-12	29947	29947	29947	27442	27442	2	2	2	2	2	2	2	2	2
SAL_CA0211AA	73214	PHE	SRR1968877;ILLUMINA;Paired;;SRX990714;381452940;99	SAL_CA0211AA	Human	Human	Human; Homo sapiens	2014	12			Europe	United Kingdom	England						Typhimurium	I			Public Health England - Gastrointestinal Bacteria Reference Unit			PRJNA248792	SRP042645	SAMN03478975	SRS905576	2015-08-27	2015-04-12	25591	25423	25423	25423	25256	2	2	2	2	2	2	2	2	2
SAL_CA0222AA	56116	PHE	SRR1968872;ILLUMINA;Paired;;SRX990709;436194080;98	SAL_CA0222AA	Human	Human	Human; Homo sapiens	2014	9			Europe	United Kingdom							Typhimurium	I			Public Health England - Gastrointestinal Bacteria Reference Unit			PRJNA248792	SRP042645	SAMN03478970	SRS905581	2015-08-27	2015-04-12	29827	29827	29827	1891	1891	269	269	2	2	2	2	2	2	2
SAL_CA0224AA	45594	PHE	SRR1968871;ILLUMINA;Paired;;SRX990708;388683462;97	SAL_CA0224AA	Human	Human	Human; Homo sapiens	2014	9			Europe	United Kingdom	England						Typhimurium	I			Public Health England - Gastrointestinal Bacteria Reference Unit			PRJNA248792	SRP042645	SAMN03478969	SRS905582	2015-08-27	2015-04-12	29826	29826	29826	29826	29826	29826	29826	2	2	2	2	2	2	2
SAL_CA0274AA	94089	PHE	SRR1968847;ILLUMINA;Paired;;SRX990684;254540880;99	SAL_CA0274AA	Human	Human	Human; Homo sapiens	2015	3			Europe	United Kingdom	England						Typhimurium	I			Public Health England - Gastrointestinal Bacteria Reference Unit			PRJNA248792	SRP042645	SAMN03478945	SRS905452	2015-08-27	2015-04-12	29787	29787	29787	29787	29787	2	2	2	2	2	2	2	2	2
SAL_CA0528AA	68675	PHE	SRR1968717;ILLUMINA;Paired;;SRX990554;357110424;99	SAL_CA0528AA	Human	Human	Human; Homo sapiens	2014	11			Europe	United Kingdom	England						Typhimurium	I			Public Health England - Gastrointestinal Bacteria Reference Unit			PRJNA248792	SRP042645	SAMN03478815	SRS905345	2015-08-27	2015-04-12	29567	29567	29567	29567	29567	269	269	2	2	2	2	2	2	2
SAL_CA0657AA	73215	PHE	SRR1968647;ILLUMINA;Paired;;SRX990484;344260280;98	SAL_CA0657AA	Human	Human	Human; Homo sapiens	2014	12			Europe	United Kingdom	England						Typhimurium	I			Public Health England - Gastrointestinal Bacteria Reference Unit			PRJNA248792	SRP042645	SAMN03478745	SRS905272	2015-08-27	2015-04-12	29463	29463	25423	25423	25256	2	2	2	2	2	2	2	2	2
SAL_CA0663AA	73131	PHE	SRR1968643;ILLUMINA;Paired;;SRX990480;413016100;98	SAL_CA0663AA	Human	Human	Human; Homo sapiens	2014	12			Europe	United Kingdom	England						Typhimurium	I			Public Health England - Gastrointestinal Bacteria Reference Unit			PRJNA248792	SRP042645	SAMN03478741	SRS905276	2015-08-27	2015-04-12	25591	25423	25423	25423	25256	2	2	2	2	2	2	2	2	2
SAL_CA0722AA	12126	PHE	SRR1968613;ILLUMINA;Paired;;SRX990450;320633500;97	SAL_CA0722AA	Human	Human	Human; Homo sapiens	2014	5			Europe	United Kingdom	Wales						Typhimurium	I			Public Health England - Gastrointestinal Bacteria Reference Unit			PRJNA248792	SRP042645	SAMN03478705	SRS905250	2015-08-27	2015-04-12	29404	26656	26656	26656	26656	2	2	2	2	2	2	2	2	2
SAL_CA0752AA	89880	PHE	SRR1968597;ILLUMINA;Paired;;SRX990434;446319918;99	SAL_CA0752AA	Human	Human	Human; Homo sapiens	2015	2			Europe	United Kingdom	England						Typhimurium	I			Public Health England - Gastrointestinal Bacteria Reference Unit			PRJNA248792	SRP042645	SAMN03478689	SRS905243	2015-08-27	2015-04-12	29380	29380	29380	29380	29380	2	2	2	2	2	2	2	2	2
SAL_CA0864AA	50321	PHE	SRR1968540;ILLUMINA;Paired;;SRX990377;356942734;97	SAL_CA0864AA	Human	Human	Human; Homo sapiens	2014	9			Europe	United Kingdom	England						Typhimurium	I			Public Health England - Gastrointestinal Bacteria Reference Unit			PRJNA248792	SRP042645	SAMN03478633	SRS905189	2015-08-27	2015-04-12	29289	24521	24521	24521	24521	24521	3610	2	2	2	2	2	2	2
SAL_CA1148AA	25337	PHE	SRR1968437;ILLUMINA;Paired;;SRX990274;220831004;94	SAL_CA1148AA	Human	Human	Human; Homo sapiens	2014	7			Europe	United Kingdom	England						Typhimurium	I			Public Health England - Gastrointestinal Bacteria Reference Unit			PRJNA248792	SRP042645	SAMN03478530	SRS905050	2015-08-27	2015-04-12	29177	29177	29177	27891	27891	269	269	2	2	2	2	2	2	2
SAL_CA1159AA	27028	PHE	SRR1968426;ILLUMINA;Paired;;SRX990263;204812396;97	SAL_CA1159AA	Human	Human	Human; Homo sapiens	2014	7			Europe	United Kingdom	England						Typhimurium	I			Public Health England - Gastrointestinal Bacteria Reference Unit			PRJNA248792	SRP042645	SAMN03478518	SRS905032	2015-08-27	2015-04-12	29166	29166	7618	7618	7618	269	269	2	2	2	2	2	2	2
SAL_CA1173AA	25334	PHE	SRR1968412;ILLUMINA;Paired;;SRX990249;283810440;94	SAL_CA1173AA	Human	Human	Human; Homo sapiens	2014	7			Europe	United Kingdom	England						Typhimurium	I			Public Health England - Gastrointestinal Bacteria Reference Unit			PRJNA248792	SRP042645	SAMN03478504	SRS905031	2015-08-27	2015-04-12	29153	29153	29153	29153	29153	2	2	2	2	2	2	2	2	2
SAL_CA1317AA	72331	PHE	SRR1968300;ILLUMINA;Paired;;SRX990137;371689164;99	SAL_CA1317AA	Human	Human	Human; Homo sapiens	2014	12			Europe	United Kingdom	England						Typhimurium	I			Public Health England - Gastrointestinal Bacteria Reference Unit			PRJNA248792	SRP042645	SAMN03478391	SRS904912	2015-08-27	2015-04-12	29051	29051	25423	25423	25256	2	2	2	2	2	2	2	2	2
SAL_CA1372AA	91280	PHE	SRR1968273;ILLUMINA;Paired;;SRX990110;386338736;98	SAL_CA1372AA	Human	Human	Human; Homo sapiens	2015	2			Europe	United Kingdom	England						Typhimurium	I			Public Health England - Gastrointestinal Bacteria Reference Unit			PRJNA248792	SRP042645	SAMN03478364	SRS904985	2015-08-27	2015-04-12	29032	29032	1954	1891	1891	269	269	2	2	2	2	2	2	2
SAL_CA1404AA	37113	PHE	SRR1968257;ILLUMINA;Paired;;SRX990094;160608690;99	SAL_CA1404AA	Human	Human	Human; Homo sapiens	2014	8			Europe	United Kingdom							Typhimurium	I			Public Health England - Gastrointestinal Bacteria Reference Unit			PRJNA248792	SRP042645	SAMN03478348	SRS904843	2015-08-27	2015-04-12	29019	29019	29019	29019	29019	29019	29019	2	2	2	2	2	2	2
SAL_CA1612AA	51273	PHE	SRR1968141;ILLUMINA;Paired;;SRX989978;374358720;96	SAL_CA1612AA	Human	Human	Human; Homo sapiens	2014	9			Europe	United Kingdom	England						Typhimurium	I			Public Health England - Gastrointestinal Bacteria Reference Unit			PRJNA248792	SRP042645	SAMN03478232	SRS904817	2015-08-27	2015-04-12	28856	28856	24521	24521	24521	24521	3610	2	2	2	2	2	2	2
SAL_CA1703AA	9236	PHE	SRR1968095;ILLUMINA;Paired;;SRX989932;308611708;97	SAL_CA1703AA	Human	Human	Human; Homo sapiens	2013	7			Europe	United Kingdom	England						Typhimurium	I			Public Health England - Gastrointestinal Bacteria Reference Unit			PRJNA248792	SRP042645	SAMN03478186	SRS904692	2015-08-27	2015-04-12	28768	28768	28768	28768	393	269	269	2	2	2	2	2	2	2
SAL_CA1749AA	72317	PHE	SRR1968062;ILLUMINA;Paired;;SRX989899;359585028;99	SAL_CA1749AA	Human	Human	Human; Homo sapiens	2014	12			Europe	United Kingdom	England						Typhimurium	I			Public Health England - Gastrointestinal Bacteria Reference Unit			PRJNA248792	SRP042645	SAMN03478153	SRS904671	2015-08-27	2015-04-12	25591	25423	25423	25423	25256	2	2	2	2	2	2	2	2	2
SAL_CA1792AA	32549	PHE	SRR1968039;ILLUMINA;Paired;;SRX989876;316138340;95	SAL_CA1792AA	Human	Human	Human; Homo sapiens	2014	7			Europe	United Kingdom							Typhimurium	I			Public Health England - Gastrointestinal Bacteria Reference Unit			PRJNA248792	SRP042645	SAMN03478130	SRS904638	2015-08-27	2015-04-12	28717	1679	1679	1679	1471	269	269	2	2	2	2	2	2	2
SAL_CA1824AA	14524	PHE	SRR1968022;ILLUMINA;Paired;;SRX989859;229801924;97	SAL_CA1824AA	Human	Human	Human; Homo sapiens	2014	5			Europe	United Kingdom			London		51.5	0	Typhimurium	I			Public Health England - Gastrointestinal Bacteria Reference Unit			PRJNA248792	SRP042645	SAMN03478113	SRS904741	2015-08-27	2015-04-12	28702	28702	1679	1679	1471	269	269	2	2	2	2	2	2	2
SAL_CA1994AA	83720	PHE	SRR1967936;ILLUMINA;Paired;;SRX989773;361439496;99	SAL_CA1994AA	Human	Human	Human; Homo sapiens	2015	1			Europe	United Kingdom							Typhimurium	I			Public Health England - Gastrointestinal Bacteria Reference Unit			PRJNA248792	SRP042645	SAMN03478027	SRS904549	2015-08-27	2015-04-12	28629	28629	28629	271	269	269	269	2	2	2	2	2	2	2
SAL_CA1999AA	3904	PHE	SRR1967933;ILLUMINA;Paired;;SRX989770;345647050;95	SAL_CA1999AA	Human	Human	Human; Homo sapiens	2014	4			Europe	United Kingdom			London		51.5	0	Typhimurium	I			Public Health England - Gastrointestinal Bacteria Reference Unit			PRJNA248792	SRP042645	SAMN03478024	SRS904633	2015-08-27	2015-04-12	28626	24870	24870	24870	24870	269	269	2	2	2	2	2	2	2
SAL_CA2075AA	73093	PHE	SRR1967893;ILLUMINA;Paired;;SRX989730;272975864;98	SAL_CA2075AA	Human	Human	Human; Homo sapiens	2014	12			Europe	United Kingdom							Typhimurium	I			Public Health England - Gastrointestinal Bacteria Reference Unit			PRJNA248792	SRP042645	SAMN03477984	SRS904573	2015-08-27	2015-04-12	28593	25423	25423	25423	25256	2	2	2	2	2	2	2	2	2
SAL_CA2268AA	75947	PHE	SRR1967703;ILLUMINA;Paired;;SRX989540;374495632;98	SAL_CA2268AA	Human	Human	Human; Homo sapiens	2014	12			Europe	United Kingdom	England						Typhimurium	I			Public Health England - Gastrointestinal Bacteria Reference Unit			PRJNA248792	SRP042645	SAMN03477793	SRS904326	2015-08-27	2015-04-12	28419	25423	25423	25423	25256	2	2	2	2	2	2	2	2	2
SAL_CA2270AA	36470	PHE	SRR1967701;ILLUMINA;Paired;;SRX989538;307842624;96	SAL_CA2270AA	Human	Human	Human; Homo sapiens	2014	7			Europe	United Kingdom	England						Typhimurium	I			Public Health England - Gastrointestinal Bacteria Reference Unit			PRJNA248792	SRP042645	SAMN03477791	SRS904459	2015-08-27	2015-04-12	28417	28417	28417	271	269	269	269	2	2	2	2	2	2	2
SAL_CA2406AA	65437	PHE	SRR1967565;ILLUMINA;Paired;;SRX989402;419702382;99	SAL_CA2406AA	Human	Human	Human; Homo sapiens	2014	10			Europe	United Kingdom	England						Typhimurium	I			Public Health England - Gastrointestinal Bacteria Reference Unit			PRJNA248792	SRP042645	SAMN03477655	SRS904175	2015-08-27	2015-04-12	28305	28305	24672	24672	1891	269	269	2	2	2	2	2	2	2
SAL_CA2510AA	38390	PHE	SRR1967461;ILLUMINA;Paired;;SRX989298;273157948;98	SAL_CA2510AA	Human	Human	Human; Homo sapiens	2014	8			Europe	United Kingdom	England						Typhimurium	I			Public Health England - Gastrointestinal Bacteria Reference Unit			PRJNA248792	SRP042645	SAMN03477551	SRS904159	2015-08-27	2015-04-12	28213	28213	1954	1891	1891	269	269	2	2	2	2	2	2	2
SAL_CA2532AA	5842	PHE	SRR1967439;ILLUMINA;Paired;;SRX989276;395839160;95	SAL_CA2532AA	Human	Human	Human; Homo sapiens	2014	4			Europe	United Kingdom	England						Typhimurium	I			Public Health England - Gastrointestinal Bacteria Reference Unit			PRJNA248792	SRP042645	SAMN03477529	SRS904153	2015-08-27	2015-04-12	28195	28195	28195	1891	1891	269	269	2	2	2	2	2	2	2
SAL_CA2551AA	22245	PHE	SRR1967420;ILLUMINA;Paired;;SRX989257;212693712;98	SAL_CA2551AA	Human	Human	Human; Homo sapiens	2014	6			Europe	United Kingdom			London		51.5	0	Typhimurium	I			Public Health England - Gastrointestinal Bacteria Reference Unit			PRJNA248792	SRP042645	SAMN03477510	SRS904058	2015-08-27	2015-04-12	28180	28180	28180	1490	2	2	2	2	2	2	2	2	2	2
SAL_CA2558AA	69883	PHE	SRR1967413;ILLUMINA;Paired;;SRX989250;242425062;99	SAL_CA2558AA	Human	Human	Human; Homo sapiens	2014	11			Europe	United Kingdom							Typhimurium	I			Public Health England - Gastrointestinal Bacteria Reference Unit			PRJNA248792	SRP042645	SAMN03477503	SRS904036	2015-08-27	2015-04-12	28175	28175	28175	28175	1659	2	2	2	2	2	2	2	2	2
SAL_CA2598AA	80559	PHE	SRR1967373;ILLUMINA;Paired;;SRX989210;287735644;98	SAL_CA2598AA	Human	Human	Human; Homo sapiens	2015	1			Europe	United Kingdom	England						Typhimurium	I			Public Health England - Gastrointestinal Bacteria Reference Unit			PRJNA248792	SRP042645	SAMN03477463	SRS904000	2015-08-27	2015-04-12	28136	28136	28136	28136	28136	28136	2	2	2	2	2	2	2	2
SAL_CA2676AA	41972	PHE	SRR1967295;ILLUMINA;Paired;;SRX989132;239472390;95	SAL_CA2676AA	Human	Human	Human; Homo sapiens	2014	8			Europe	United Kingdom	Wales						Typhimurium	I			Public Health England - Gastrointestinal Bacteria Reference Unit			PRJNA248792	SRP042645	SAMN03477385	SRS903892	2015-08-27	2015-04-12	28066	28066	1954	1891	1891	269	269	2	2	2	2	2	2	2
SAL_CA2684AA	43425	PHE	SRR1967287;ILLUMINA;Paired;;SRX989124;274332684;97	SAL_CA2684AA	Human	Human	Human; Homo sapiens	2014	9			Europe	United Kingdom	England						Typhimurium	I			Public Health England - Gastrointestinal Bacteria Reference Unit			PRJNA248792	SRP042645	SAMN03477377	SRS903881	2015-08-27	2015-04-12	28058	28058	28058	28058	28058	2	2	2	2	2	2	2	2	2
SAL_CA2692AA	14526	PHE	SRR1967279;ILLUMINA;Paired;;SRX989116;227532284;98	SAL_CA2692AA	Human	Human	Human; Homo sapiens	2014	5			Europe	United Kingdom	England						Typhimurium	I			Public Health England - Gastrointestinal Bacteria Reference Unit			PRJNA248792	SRP042645	SAMN03477369	SRS903869	2015-08-27	2015-04-12	28051	28051	28051	1850	1850	2	2	2	2	2	2	2	2	2
SAL_CA2775AA	73199	PHE	SRR1967196;ILLUMINA;Paired;;SRX989033;308122650;99	SAL_CA2775AA	Human	Human	Human; Homo sapiens	2014	12			Europe	United Kingdom	England						Typhimurium	I			Public Health England - Gastrointestinal Bacteria Reference Unit			PRJNA248792	SRP042645	SAMN03477286	SRS903800	2015-08-27	2015-04-12	27983	27983	27983	27983	2	2	2	2	2	2	2	2	2	2
SAL_CA2878AA	27790	PHE	SRR1967093;ILLUMINA;Paired;;SRX988930;219562410;97	SAL_CA2878AA	Human	Human	Human; Homo sapiens	2014	7			Europe	United Kingdom	England						Typhimurium	I			Public Health England - Gastrointestinal Bacteria Reference Unit			PRJNA248792	SRP042645	SAMN03477171	SRS903694	2015-08-27	2015-04-12	27891	27891	27891	27891	27891	269	269	2	2	2	2	2	2	2
SAL_CA2902AA	65417	PHE	SRR1967069;ILLUMINA;Paired;;SRX988906;438296400;100	SAL_CA2902AA	Human	Human	Human; Homo sapiens	2014	10			Europe	United Kingdom							Typhimurium	I			Public Health England - Gastrointestinal Bacteria Reference Unit			PRJNA248792	SRP042645	SAMN03477147	SRS903682	2015-08-27	2015-04-12	27877	25426	1679	1679	1471	269	269	2	2	2	2	2	2	2
SAL_CA2920AA	63870	PHE	SRR1967051;ILLUMINA;Paired;;SRX988888;275614812;99	SAL_CA2920AA	Human	Human	Human; Homo sapiens	2014	8			Europe	United Kingdom							Typhimurium	I			Public Health England - Gastrointestinal Bacteria Reference Unit			PRJNA248792	SRP042645	SAMN03477129	SRS903717	2015-08-27	2015-04-12	27861	27861	1954	1891	1891	269	269	2	2	2	2	2	2	2
SAL_CA2923AA	23513	PHE	SRR1967048;ILLUMINA;Paired;;SRX988885;264698000;98	SAL_CA2923AA	Human	Human	Human; Homo sapiens	2014	6			Europe	United Kingdom			London		51.5	0	Typhimurium	I			Public Health England - Gastrointestinal Bacteria Reference Unit			PRJNA248792	SRP042645	SAMN03477126	SRS903720	2015-08-27	2015-04-12	27860	27860	27860	271	269	269	269	2	2	2	2	2	2	2
SAL_CA2926AA	27971	PHE	SRR1967045;ILLUMINA;Paired;;SRX988882;171292252;94	SAL_CA2926AA	Human	Human	Human; Homo sapiens	2014	7			Europe	United Kingdom	England						Typhimurium	I			Public Health England - Gastrointestinal Bacteria Reference Unit			PRJNA248792	SRP042645	SAMN03477123	SRS903723	2015-08-27	2015-04-12	27857	27857	24870	24870	24870	269	269	2	2	2	2	2	2	2
SAL_CA2998AA	80570	PHE	SRR1966973;ILLUMINA;Paired;;SRX988810;345104892;99	SAL_CA2998AA	Human	Human	Human; Homo sapiens	2015	1			Europe	United Kingdom	England						Typhimurium	I			Public Health England - Gastrointestinal Bacteria Reference Unit			PRJNA248792	SRP042645	SAMN03477051	SRS903606	2015-08-27	2015-04-12	27796	27796	27796	27796	27796	2	2	2	2	2	2	2	2	2
SAL_CA3154AA	73132	PHE	SRR1966817;ILLUMINA;Paired;;SRX988654;349094592;99	SAL_CA3154AA	Human	Human	Human; Homo sapiens	2014	12			Europe	United Kingdom	England						Typhimurium	I			Public Health England - Gastrointestinal Bacteria Reference Unit			PRJNA248792	SRP042645	SAMN03476895	SRS903416	2015-08-27	2015-04-12	25591	25423	25423	25423	25256	2	2	2	2	2	2	2	2	2
SAL_CA3387AA	37795	PHE	SRR1966580;ILLUMINA;Paired;;SRX988421;270686260;97	SAL_CA3387AA	ND	ND	Other	2014	8			Europe	United Kingdom	England						Typhimurium	I			Public Health England - Gastrointestinal Bacteria Reference Unit			PRJNA248792	SRP042645	SAMN03476662	SRS903177	2015-08-27	2015-04-12	26656	26656	26656	26656	26656	2	2	2	2	2	2	2	2	2
SAL_CA3403AA	6471	PHE	SRR1966564;ILLUMINA;Paired;;SRX988405;192134120;94	SAL_CA3403AA	Food	ND	ND	2014	4			Europe	United Kingdom							Typhimurium	I			Public Health England - Gastrointestinal Bacteria Reference Unit			PRJNA248792	SRP042645	SAMN03476646	SRS903164	2015-08-27	2015-04-12	27442	27442	27442	27442	27442	2	2	2	2	2	2	2	2	2
SAL_CA3460AA	27782	PHE	SRR1966506;ILLUMINA;Paired;;SRX988348;211521216;96	SAL_CA3460AA	Human	Human	Human; Homo sapiens	2014	7			Europe	United Kingdom			London		51.5	0	Typhimurium	I			Public Health England - Gastrointestinal Bacteria Reference Unit			PRJNA248792	SRP042645	SAMN03476589	SRS903134	2015-08-27	2015-04-12	27398	27398	27398	27398	27398	2	2	2	2	2	2	2	2	2
SAL_CA3461AA	63719	PHE	SRR1966505;ILLUMINA;Paired;;SRX988347;261609600;100	SAL_CA3461AA	Human	Human	Human; Homo sapiens	2014	10			Europe	United Kingdom							Typhimurium	I			Public Health England - Gastrointestinal Bacteria Reference Unit			PRJNA248792	SRP042645	SAMN03476588	SRS903135	2015-08-27	2015-04-12	27397	27397	27397	27397	27397	2	2	2	2	2	2	2	2	2
SAL_CA3507AA	73129	PHE	SRR1966459;ILLUMINA;Paired;;SRX988301;376632620;98	SAL_CA3507AA	Human	Human	Human; Homo sapiens	2014	12			Europe	United Kingdom	England						Typhimurium	I			Public Health England - Gastrointestinal Bacteria Reference Unit			PRJNA248792	SRP042645	SAMN03476542	SRS903093	2015-08-27	2015-04-12	25591	25423	25423	25423	25256	2	2	2	2	2	2	2	2	2
SAL_CA3512AA	83332	PHE	SRR1966454;ILLUMINA;Paired;;SRX988296;363116754;99	SAL_CA3512AA	Human	Human	Human; Homo sapiens	2015	1			Europe	United Kingdom							Typhimurium	I			Public Health England - Gastrointestinal Bacteria Reference Unit			PRJNA248792	SRP042645	SAMN03476537	SRS903193	2015-08-27	2015-04-12	27349	27349	27349	27349	27349	2	2	2	2	2	2	2	2	2
SAL_CA3599AA	25168	PHE	SRR1966368;ILLUMINA;Paired;;SRX988210;232737232;94	SAL_CA3599AA	Human	Human	Human; Homo sapiens	2014	7			Europe	United Kingdom			London		51.5	0	Lagos	I			Public Health England - Gastrointestinal Bacteria Reference Unit			PRJNA248792	SRP042645	SAMN03476451	SRS902992	2015-08-27	2015-04-12	27268	27268	27268	27268	26656	2	2	2	2	2	2	2	2	2
SAL_CA3608AA	40267	PHE	SRR1966359;ILLUMINA;Paired;;SRX988201;232923090;95	SAL_CA3608AA	Human	Human	Human; Homo sapiens	2014	8			Europe	United Kingdom	England						Typhimurium	I			Public Health England - Gastrointestinal Bacteria Reference Unit			PRJNA248792	SRP042645	SAMN03476442	SRS902987	2015-08-27	2015-04-12	27260	27260	27260	6	2	2	2	2	2	2	2	2	2	2
SAL_CA3639AA	14907	PHE	SRR1966328;ILLUMINA;Paired;;SRX988170;205100084;98	SAL_CA3639AA	Human	Human	Human; Homo sapiens	2014	5			Europe	United Kingdom	England						Typhimurium	I			Public Health England - Gastrointestinal Bacteria Reference Unit			PRJNA248792	SRP042645	SAMN03476411	SRS902951	2015-08-27	2015-04-12	27232	27232	27185	27185	27185	2	2	2	2	2	2	2	2	2
SAL_CA3663AA	75993	PHE	SRR1966304;ILLUMINA;Paired;;SRX988146;295830810;99	SAL_CA3663AA	Human	Human	Human; Homo sapiens	2014	12			Europe	United Kingdom	England						Typhimurium	I			Public Health England - Gastrointestinal Bacteria Reference Unit			PRJNA248792	SRP042645	SAMN03476387	SRS902908	2015-08-27	2015-04-12	27211	27211	429	429	307	2	2	2	2	2	2	2	2	2
SAL_CA3691AA	21761	PHE	SRR1966276;ILLUMINA;Paired;;SRX988118;287093940;98	SAL_CA3691AA	Human	Human	Human; Homo sapiens	2014	6			Europe	United Kingdom	England						Typhimurium	I			Public Health England - Gastrointestinal Bacteria Reference Unit			PRJNA248792	SRP042645	SAMN03476359	SRS902860	2015-08-27	2015-04-12	27185	27185	27185	27185	27185	2	2	2	2	2	2	2	2	2
SAL_CA3770AA	61907	PHE	SRR1966196;ILLUMINA;Paired;;SRX988039;312148782;99	SAL_CA3770AA	Human	Human	Human; Homo sapiens	2014	10			Europe	United Kingdom							Typhimurium	I			Public Health England - Gastrointestinal Bacteria Reference Unit			PRJNA248792	SRP042645	SAMN03476280	SRS902774	2015-08-27	2015-04-12	27110	27110	27110	27110	27110	2	2	2	2	2	2	2	2	2
SAL_CA3779AA	63696	PHE	SRR1966187;ILLUMINA;Paired;;SRX988030;285533200;100	SAL_CA3779AA	Human	Human	Human; Homo sapiens	2014	10			Europe	United Kingdom	England						Typhimurium	I			Public Health England - Gastrointestinal Bacteria Reference Unit			PRJNA248792	SRP042645	SAMN03476271	SRS902761	2015-08-27	2015-04-12	25132	25132	25132	25132	25132	2	2	2	2	2	2	2	2	2
SAL_CA3812AA	40268	PHE	SRR1966153;ILLUMINA;Paired;;SRX987997;260516790;95	SAL_CA3812AA	Human	Human	Human; Homo sapiens	2014	8			Europe	United Kingdom	England						Typhimurium	I			Public Health England - Gastrointestinal Bacteria Reference Unit			PRJNA248792	SRP042645	SAMN03476238	SRS902741	2015-08-27	2015-04-12	27077	27077	27077	27077	27077	2	2	2	2	2	2	2	2	2
SAL_CA3952AA	7414	PHE	SRR1966007;ILLUMINA;Paired;;SRX987856;175297430;97	SAL_CA3952AA	Human	Human	Human; Homo sapiens	2014	4			Europe	United Kingdom			London		51.5	0	Typhimurium	I			Public Health England - Gastrointestinal Bacteria Reference Unit			PRJNA248792	SRP042645	SAMN03476097	SRS902621	2015-08-27	2015-04-12	26955	26955	26955	1471	1471	269	269	2	2	2	2	2	2	2
SAL_CA3994AA	22250	PHE	SRR1965964;ILLUMINA;Paired;;SRX987814;228030264;99	SAL_CA3994AA	Human	Human	Human; Homo sapiens	2014	6			Europe	United Kingdom							Typhimurium	I			Public Health England - Gastrointestinal Bacteria Reference Unit			PRJNA248792	SRP042645	SAMN03476055	SRS902611	2015-08-27	2015-04-12	26914	26914	26914	26914	26914	2	2	2	2	2	2	2	2	2
SAL_CA4068AA	65040	PHE	SRR1965888;ILLUMINA;Paired;;SRX987737;189594702;99	SAL_CA4068AA	Human	Human	Human; Homo sapiens	2014	11			Europe	United Kingdom			London		51.5	0	Typhimurium	I			Public Health England - Gastrointestinal Bacteria Reference Unit			PRJNA248792	SRP042645	SAMN03475981	SRS902540	2015-08-27	2015-04-12	24672	24672	24672	24672	1891	269	269	2	2	2	2	2	2	2
SAL_CA4292AA	39474	PHE	SRR1965644;ILLUMINA;Paired;;SRX987493;210124992;96	SAL_CA4292AA	Human	Human	Human; Homo sapiens	2014	8			Europe	United Kingdom	England						Typhimurium	I			Public Health England - Gastrointestinal Bacteria Reference Unit			PRJNA248792	SRP042645	SAMN03475756	SRS902305	2015-08-27	2015-04-12	26656	26656	26656	26656	26656	2	2	2	2	2	2	2	2	2
SAL_CA4368AA	23454	PHE	SRR1965556;ILLUMINA;Paired;;SRX987406;202017438;97	SAL_CA4368AA	Human	Human	Human; Homo sapiens	2014	5			Europe	United Kingdom	England						Typhimurium	I			Public Health England - Gastrointestinal Bacteria Reference Unit			PRJNA248792	SRP042645	SAMN03475678	SRS902207	2015-08-27	2015-04-12	24870	24870	24870	24870	24870	269	269	2	2	2	2	2	2	2
SAL_CA4390AA	9299	PHE	SRR1965534;ILLUMINA;Paired;;SRX987384;261337788;97	SAL_CA4390AA	Human	Human	Human; Homo sapiens	2014	5			Europe	United Kingdom	England						Typhimurium	I			Public Health England - Gastrointestinal Bacteria Reference Unit			PRJNA248792	SRP042645	SAMN03475656	SRS902194	2015-08-27	2015-04-12	26571	26571	26571	26571	1499	269	269	2	2	2	2	2	2	2
SAL_CA4415AA	38392	PHE	SRR1965508;ILLUMINA;Paired;;SRX987359;345302580;95	SAL_CA4415AA	Human	Human	Human; Homo sapiens	2014	8			Europe	United Kingdom	England						Typhimurium	I			Public Health England - Gastrointestinal Bacteria Reference Unit			PRJNA248792	SRP042645	SAMN03475630	SRS902237	2015-08-27	2015-04-12	26552	26552	26552	26552	26552	269	269	2	2	2	2	2	2	2
SAL_CA4546AA	50875	PHE	SRR1965373;ILLUMINA;Paired;;SRX987221;370820352;96	SAL_CA4546AA	Human	Human	Human; Homo sapiens	2014	9			Europe	United Kingdom			London		51.5	0	Typhimurium	I			Public Health England - Gastrointestinal Bacteria Reference Unit			PRJNA248792	SRP042645	SAMN03475496	SRS902138	2015-08-27	2015-04-12	26441	1679	1679	1679	1471	269	269	2	2	2	2	2	2	2
SAL_CA4606AA	57099	PHE	SRR1965312;ILLUMINA;Paired;;SRX987160;179251584;96	SAL_CA4606AA	Human	Human	Human; Homo sapiens	2014	8			Europe	United Kingdom	England						Typhimurium	I			Public Health England - Gastrointestinal Bacteria Reference Unit			PRJNA248792	SRP042645	SAMN03475436	SRS901922	2015-08-27	2015-04-12	26389	26389	26389	25423	25256	2	2	2	2	2	2	2	2	2
SAL_CA4607AA	14103	PHE	SRR1965311;ILLUMINA;Paired;;SRX987159;203031552;96	SAL_CA4607AA	Human	Human	Human; Homo sapiens	2014	5			Europe	United Kingdom	England						Typhimurium	I			Public Health England - Gastrointestinal Bacteria Reference Unit			PRJNA248792	SRP042645	SAMN03475435	SRS901923	2015-08-27	2015-04-12	26388	24870	24870	24870	24870	269	269	2	2	2	2	2	2	2
SAL_CA4673AA	68680	PHE	SRR1965244;ILLUMINA;Paired;;SRX987090;331777908;99	SAL_CA4673AA	Human	Human	Human; Homo sapiens	2014	11			Europe	United Kingdom	England						Typhimurium	I			Public Health England - Gastrointestinal Bacteria Reference Unit			PRJNA248792	SRP042645	SAMN03475369	SRS902042	2015-08-27	2015-04-12	24672	24672	24672	24672	1891	269	269	2	2	2	2	2	2	2
SAL_CA4757AA	25210	PHE	SRR1965151;ILLUMINA;Paired;;SRX986995;290146752;96	SAL_CA4757AA	Human	Human	Human; Homo sapiens	2014	7			Europe	United Kingdom	England						Typhimurium	I			Public Health England - Gastrointestinal Bacteria Reference Unit			PRJNA248792	SRP042645	SAMN03474045	SRS901902	2015-08-27	2015-04-12	26256	26256	26256	26256	26256	26256	26256	2	2	2	2	2	2	2
SAL_CA4773AA	50857	PHE	SRR1965135;ILLUMINA;Paired;;SRX986979;454187072;92	SAL_CA4773AA	Human	Human	Human; Homo sapiens	2014	9			Europe	United Kingdom	England						Typhimurium	I			Public Health England - Gastrointestinal Bacteria Reference Unit			PRJNA248792	SRP042645	SAMN03474029	SRS901797	2015-08-27	2015-04-12	26241	26241	26241	2033	1471	269	269	2	2	2	2	2	2	2
SAL_CA4859AA	63880	PHE	SRR1965045;ILLUMINA;Paired;;SRX986892;274930920;99	SAL_CA4859AA	Human	Human	Human; Homo sapiens	2014	11			Europe	United Kingdom							Typhimurium	I			Public Health England - Gastrointestinal Bacteria Reference Unit			PRJNA248792	SRP042645	SAMN03473943	SRS901741	2015-08-27	2015-04-12	24672	24672	24672	24672	1891	269	269	2	2	2	2	2	2	2
SAL_CA4890AA	74315	PHE	SRR1963532;ILLUMINA;Paired;;SRX986028;468862576;98	SAL_CA4890AA	Human	Human	Human; Homo sapiens	2014	12			Europe	United Kingdom	England						Typhimurium	I			Public Health England - Gastrointestinal Bacteria Reference Unit			PRJNA248792	SRP042645	SAMN03469986	SRS900923	2015-08-27	2015-04-10	2373	2373	271	271	269	269	269	2	2	2	2	2	2	2
SAL_CA4921AA	73538	PHE	SRR1963501;ILLUMINA;Paired;;SRX985996;350561970;99	SAL_CA4921AA	ND	Other Mammal	ND	2014	9			Europe	United Kingdom							Typhimurium	I			Public Health England - Gastrointestinal Bacteria Reference Unit			PRJNA248792	SRP042645	SAMN03469954	SRS900885	2015-08-27	2015-04-10	25373	24476	24476	1370	2	2	2	2	2	2	2	2	2	2
SAL_CA5010AA	71529	PHE	SRR1963379;ILLUMINA;Paired;;SRX985896;277746084;99	SAL_CA5010AA	Human	Human	Human; Homo sapiens	2014	8			Europe	United Kingdom							Typhimurium	I			Public Health England - Gastrointestinal Bacteria Reference Unit			PRJNA248792	SRP042645	SAMN03469856	SRS900791	2015-08-27	2015-04-10	26044	26044	1954	1891	1891	269	269	2	2	2	2	2	2	2
SAL_CA5074AA	75673	PHE	SRR1963313;ILLUMINA;Paired;;SRX985831;244472976;99	SAL_CA5074AA	Human	Human	Human; Homo sapiens	2014	12			Europe	United Kingdom	England						Typhimurium	I			Public Health England - Gastrointestinal Bacteria Reference Unit			PRJNA248792	SRP042645	SAMN03469790	SRS900712	2015-08-27	2015-04-10	25591	25423	25423	25423	25256	2	2	2	2	2	2	2	2	2
SAL_CA5111AA	71553	PHE	SRR1963276;ILLUMINA;Paired;;SRX985793;221566200;100	SAL_CA5111AA	Human	Human	Human; Homo sapiens	2014	12			Europe	United Kingdom	England						Typhimurium	I			Public Health England - Gastrointestinal Bacteria Reference Unit			PRJNA248792	SRP042645	SAMN03469735	SRS900650	2015-08-27	2015-04-10	25960	25960	25423	25423	25256	2	2	2	2	2	2	2	2	2
SAL_CA5163AA	73637	PHE	SRR1963199;ILLUMINA;Paired;;SRX985733;343877490;99	SAL_CA5163AA	Human	Human	Human; Homo sapiens	2014	12			Europe	United Kingdom	England						Typhimurium	I			Public Health England - Gastrointestinal Bacteria Reference Unit			PRJNA248792	SRP042645	SAMN03469680	SRS900587	2015-08-27	2015-04-10	25591	25423	25423	25423	25256	2	2	2	2	2	2	2	2	2
SAL_CA5168AA	69206	PHE	SRR1963146;ILLUMINA;Paired;;SRX985680;302513310;99	SAL_CA5168AA	Human	Human	Human; Homo sapiens	2014	11			Europe	United Kingdom	England						Typhimurium	I			Public Health England - Gastrointestinal Bacteria Reference Unit			PRJNA248792	SRP042645	SAMN03469675	SRS900706	2015-08-27	2015-04-10	24672	24672	24672	24672	1891	269	269	2	2	2	2	2	2	2
SAL_CA5252AA	71368	PHE	SRR1962284;ILLUMINA;Paired;;SRX985587;267379596;99	SAL_CA5252AA	Food	ND	ND	2012	11			Europe	United Kingdom							Typhimurium	I			Public Health England - Gastrointestinal Bacteria Reference Unit			PRJNA248792	SRP042645	SAMN03469195	SRS900508	2015-08-27	2015-04-10	25850	25850	25358	25358	2	2	2	2	2	2	2	2	2	2
SAL_CA5313AA	71590	PHE	SRR1960687;ILLUMINA;Paired;;SRX985525;231968682;99	SAL_CA5313AA	Human	Human	Human; Homo sapiens	2014	12			Europe	United Kingdom	England						Typhimurium	I			Public Health England - Gastrointestinal Bacteria Reference Unit			PRJNA248792	SRP042645	SAMN03469132	SRS900441	2015-08-27	2015-04-10	25800	25423	25423	25423	25256	2	2	2	2	2	2	2	2	2
SAL_CA5374AA	79056	PHE	SRR1960315;ILLUMINA;Paired;;SRX985464;346500560;98	SAL_CA5374AA	Human	Human	Human; Homo sapiens	2015	1			Europe	United Kingdom							Typhimurium	I			Public Health England - Gastrointestinal Bacteria Reference Unit			PRJNA248792	SRP042645	SAMN03469074	SRS900384	2015-08-27	2015-04-10	25752	25563	25563	24998	2	2	2	2	2	2	2	2	2	2
SAL_CA5413AA	71412	PHE	SRR1960276;ILLUMINA;Paired;;SRX985425;390139794;99	SAL_CA5413AA	Food	ND	ND	2013	5			Europe	United Kingdom							Typhimurium	I			Public Health England - Gastrointestinal Bacteria Reference Unit			PRJNA248792	SRP042645	SAMN03469057	SRS900353	2015-08-27	2015-04-10	25716	25716	25358	25358	2	2	2	2	2	2	2	2	2	2
SAL_CA5493AA	78603	PHE	SRR1960189;ILLUMINA;Paired;;SRX985338;353059700;98	SAL_CA5493AA	Human	Human	Human; Homo sapiens	2014	12			Europe	United Kingdom	England						Culture	I			Public Health England - Gastrointestinal Bacteria Reference Unit			PRJNA248792	SRP042645	SAMN03468989	SRS899888	2015-08-27	2015-04-10	25646	25423	25423	25423	25256	2	2	2	2	2	2	2	2	2
SAL_CA5497AA	71559	PHE	SRR1960185;ILLUMINA;Paired;;SRX985334;216368200;100	SAL_CA5497AA	Human	Human	Human; Homo sapiens	2014	12			Europe	United Kingdom	England						Typhimurium	I			Public Health England - Gastrointestinal Bacteria Reference Unit			PRJNA248792	SRP042645	SAMN03468985	SRS899859	2015-08-27	2015-04-10	25642	25642	25642	25642	25642	2	2	2	2	2	2	2	2	2
SAL_CA5515AA	74311	PHE	SRR1960147;ILLUMINA;Paired;;SRX985306;545019356;98	SAL_CA5515AA	Human	Human	Human; Homo sapiens	2014	12			Europe	United Kingdom	England						Typhimurium	I			Public Health England - Gastrointestinal Bacteria Reference Unit			PRJNA248792	SRP042645	SAMN03468967	SRS899839	2015-08-27	2015-04-10	25591	25423	25423	25423	25256	2	2	2	2	2	2	2	2	2
SAL_CA5535AA	79015	PHE	SRR1960127;ILLUMINA;Paired;;SRX985286;224720482;97	SAL_CA5535AA	Human	Human	Human; Homo sapiens	2015	1			Europe	United Kingdom	Wales						Typhimurium	I			Public Health England - Gastrointestinal Bacteria Reference Unit			PRJNA248792	SRP042645	SAMN03468947	SRS899815	2015-08-27	2015-04-10	25615	7360	1651	302	2	2	2	2	2	2	2	2	2	2
SAL_CA5563AA	70660	PHE	SRR1960076;ILLUMINA;Paired;;SRX985251;336464766;99	SAL_CA5563AA	Human	Human	Human; Homo sapiens	2014	11			Europe	United Kingdom	England						Typhimurium	I			Public Health England - Gastrointestinal Bacteria Reference Unit			PRJNA248792	SRP042645	SAMN03468919	SRS899789	2015-08-27	2015-04-10	25591	25423	25423	25423	25256	2	2	2	2	2	2	2	2	2
SAL_CA5564AA	68870	PHE	SRR1960075;ILLUMINA;Paired;;SRX985250;276390180;99	SAL_CA5564AA	Human	Human	Human; Homo sapiens	2014	10			Europe	United Kingdom							Typhimurium	I			Public Health England - Gastrointestinal Bacteria Reference Unit			PRJNA248792	SRP042645	SAMN03468918	SRS899788	2015-08-27	2015-04-10	25590	25426	1679	1679	1471	269	269	2	2	2	2	2	2	2
SAL_CA5572AA	71413	PHE	SRR1960058;ILLUMINA;Paired;;SRX985236;345069054;99	SAL_CA5572AA	Human	Human	Human; Homo sapiens	2013	5			Europe	United Kingdom							Typhimurium	I			Public Health England - Gastrointestinal Bacteria Reference Unit			PRJNA248792	SRP042645	SAMN03468905	SRS899650	2015-08-27	2015-04-10	25583	25583	25358	25358	2	2	2	2	2	2	2	2	2	2
SAL_CA5597AA	79075	PHE	SRR1960033;ILLUMINA;Paired;;SRX985210;338473674;99	SAL_CA5597AA	Human	Human	Human; Homo sapiens	2015	1			Europe	United Kingdom							Typhimurium	I			Public Health England - Gastrointestinal Bacteria Reference Unit			PRJNA248792	SRP042645	SAMN03468765	SRS899501	2015-08-27	2015-04-10	25563	25563	25563	24998	2	2	2	2	2	2	2	2	2	2
SAL_CA5630AA	71369	PHE	SRR1959495;ILLUMINA;Paired;;SRX984695;286249590;99	SAL_CA5630AA	ND	Other Mammal	ND	2012	11			Europe	United Kingdom							Typhimurium	I			Public Health England - Gastrointestinal Bacteria Reference Unit			PRJNA248792	SRP042645	SAMN03468699	SRS899263	2015-08-27	2015-04-10	25531	25531	25531	25531	2	2	2	2	2	2	2	2	2	2
SAL_CA5668AA	75737	PHE	SRR1959453;ILLUMINA;Paired;;SRX984653;301377582;99	SAL_CA5668AA	Human	Human	Human; Homo sapiens	2014	12			Europe	United Kingdom							Typhimurium	I			Public Health England - Gastrointestinal Bacteria Reference Unit			PRJNA248792	SRP042645	SAMN03468634	SRS899220	2015-08-27	2015-04-10	25501	25501	25501	25501	25501	25501	25501	2	2	2	2	2	2	2
SAL_CA5754AA	74296	PHE	SRR1959318;ILLUMINA;Paired;;SRX984517;503307616;98	SAL_CA5754AA	Human	Human	Human; Homo sapiens	2014	12			Europe	United Kingdom			London		51.5	0	Typhimurium	I			Public Health England - Gastrointestinal Bacteria Reference Unit			PRJNA248792	SRP042645	SAMN03468523	SRS899104	2015-08-27	2015-04-10	25426	25426	1679	1679	1471	269	269	2	2	2	2	2	2	2
SAL_CA5758AA	71589	PHE	SRR1959314;ILLUMINA;Paired;;SRX984513;242001936;99	SAL_CA5758AA	Human	Human	Human; Homo sapiens	2014	12			Europe	United Kingdom	England						Typhimurium	I			Public Health England - Gastrointestinal Bacteria Reference Unit			PRJNA248792	SRP042645	SAMN03468519	SRS899067	2015-08-27	2015-04-10	25423	25423	25423	25423	25256	2	2	2	2	2	2	2	2	2
SAL_CA5798AA	78691	PHE	SRR1959274;ILLUMINA;Paired;;SRX984473;370033888;98	SAL_CA5798AA	Human	Human	Human; Homo sapiens	2014	12			Europe	United Kingdom	England						Typhimurium	I			Public Health England - Gastrointestinal Bacteria Reference Unit			PRJNA248792	SRP042645	SAMN03468479	SRS899044	2015-08-27	2015-04-10	25390	25390	25390	25390	25390	25390	25390	2	2	2	2	2	2	2
SAL_CA5957AA	54029	PHE	SRR1958620;ILLUMINA;Paired;;SRX984021;318682830;97	SAL_CA5957AA	Human	Human	Human; Homo sapiens	2014	9			Europe	United Kingdom	England						Typhimurium	I			Public Health England - Gastrointestinal Bacteria Reference Unit			PRJNA248792	SRP042645	SAMN03466513	SRS898660	2015-08-27	2015-04-09	25256	25256	25256	25256	25256	2	2	2	2	2	2	2	2	2
SAL_CA6014AA	46144	PHE	SRR1958563;ILLUMINA;Paired;;SRX983964;206731776;96	SAL_CA6014AA	Human	Human	Human; Homo sapiens	2014	9			Europe	United Kingdom	England						Typhimurium	I			Public Health England - Gastrointestinal Bacteria Reference Unit			PRJNA248792	SRP042645	SAMN03466456	SRS898607	2015-08-27	2015-04-09	25204	25204	1870	1870	1870	2	2	2	2	2	2	2	2	2
SAL_CA6094AA	66463	PHE	SRR1958483;ILLUMINA;Paired;;SRX983884;321968790;99	SAL_CA6094AA	Human	Human	Human; Homo sapiens	2014	10			Europe	United Kingdom	England						Typhimurium	I			Public Health England - Gastrointestinal Bacteria Reference Unit			PRJNA248792	SRP042645	SAMN03466376	SRS898536	2015-08-27	2015-04-09	25132	25132	25132	25132	25132	2	2	2	2	2	2	2	2	2
SAL_CA6112AA	49728	PHE	SRR1958465;ILLUMINA;Paired;;SRX983866;361122624;96	SAL_CA6112AA	Human	Human	Human; Homo sapiens	2014	9			Europe	United Kingdom	England						Typhimurium	I			Public Health England - Gastrointestinal Bacteria Reference Unit			PRJNA248792	SRP042645	SAMN03466358	SRS898500	2015-08-27	2015-04-09	25116	25116	25116	25116	25116	2	2	2	2	2	2	2	2	2
SAL_CA6246AA	50145	PHE	SRR1958331;ILLUMINA;Paired;;SRX983732;341001740;95	SAL_CA6246AA	Human	Human	Human; Homo sapiens	2014	9			Europe	United Kingdom							Typhimurium	I			Public Health England - Gastrointestinal Bacteria Reference Unit			PRJNA248792	SRP042645	SAMN03466224	SRS898369	2015-08-27	2015-04-09	24998	24998	24998	24998	2	2	2	2	2	2	2	2	2	2
SAL_CA6376AA	46143	PHE	SRR1958201;ILLUMINA;Paired;;SRX983602;189665280;96	SAL_CA6376AA	Human	Human	Human; Homo sapiens	2014	9			Europe	United Kingdom	Wales						Typhimurium	I			Public Health England - Gastrointestinal Bacteria Reference Unit			PRJNA248792	SRP042645	SAMN03466093	SRS898250	2015-08-27	2015-04-09	24882	7334	7334	7334	307	2	2	2	2	2	2	2	2	2
SAL_CA6388AA	54044	PHE	SRR1958189;ILLUMINA;Paired;;SRX983590;232278528;97	SAL_CA6388AA	Human	Human	Human; Homo sapiens	2014	9			Europe	United Kingdom	England						Typhimurium	I			Public Health England - Gastrointestinal Bacteria Reference Unit			PRJNA248792	SRP042645	SAMN03466081	SRS898234	2015-08-27	2015-04-09	24870	24870	24870	24870	24870	269	269	2	2	2	2	2	2	2
SAL_CA6399AA	58509	PHE	SRR1958177;ILLUMINA;Paired;;SRX983579;287334236;98	SAL_CA6399AA	Human	Human	Human; Homo sapiens	2014	10			Europe	United Kingdom							Typhimurium	I			Public Health England - Gastrointestinal Bacteria Reference Unit			PRJNA248792	SRP042645	SAMN03466071	SRS898209	2015-08-27	2015-04-09	24861	24861	1679	1679	1471	269	269	2	2	2	2	2	2	2
SAL_CA6553AA	49727	PHE	SRR1958015;ILLUMINA;Paired;;SRX983417;335058080;98	SAL_CA6553AA	Human	Human	Human; Homo sapiens	2014	9			Europe	United Kingdom	England						Typhimurium	I			Public Health England - Gastrointestinal Bacteria Reference Unit			PRJNA248792	SRP042645	SAMN03465917	SRS898062	2015-08-27	2015-04-09	24720	24720	24720	24720	1471	269	269	2	2	2	2	2	2	2
SAL_CA6603AA	62623	PHE	SRR1957965;ILLUMINA;Paired;;SRX983367;284852700;99	SAL_CA6603AA	Human	Human	Human; Homo sapiens	2014	11			Europe	United Kingdom			London		51.5	0	Typhimurium	I			Public Health England - Gastrointestinal Bacteria Reference Unit			PRJNA248792	SRP042645	SAMN03465867	SRS897993	2015-08-27	2015-04-09	24672	24672	24672	24672	1891	269	269	2	2	2	2	2	2	2
SAL_CA6743AA	48279	PHE	SRR1957825;ILLUMINA;Paired;;SRX983227;284848066;97	SAL_CA6743AA	Human	Human	Human; Homo sapiens	2014	9			Europe	United Kingdom	England						Typhimurium	I			Public Health England - Gastrointestinal Bacteria Reference Unit			PRJNA248792	SRP042645	SAMN03465721	SRS897866	2015-08-27	2015-04-09	24543	24521	24521	24521	24521	24521	3610	2	2	2	2	2	2	2
SAL_CA6767AA	44722	PHE	SRR1957801;ILLUMINA;Paired;;SRX983203;273397604;97	SAL_CA6767AA	Human	Human	Human; Homo sapiens	2014	9			Europe	United Kingdom	England						Typhimurium	I			Public Health England - Gastrointestinal Bacteria Reference Unit			PRJNA248792	SRP042645	SAMN03465697	SRS897826	2015-08-27	2015-04-09	24521	24521	24521	24521	24521	24521	3610	2	2	2	2	2	2	2
SAL_DA0425AA	H124660713	PHE	SRR1646356;ILLUMINA;Paired;;SRX755777;296833572;98	SAL_DA0425AA	Human	Human	Human; Homo sapiens	2012	11											Typhimurium	I			Public Health England - Gastrointestinal Bacteria Reference Unit			PRJNA248792	SRP042645	SAMN03169641	SRS741007	2015-08-27	2014-11-16	21427	21427	21427	21427	1891	269	269	2	2	2	2	2	2	2
SAL_DA0426AA	H122420308	PHE	SRR1646355;ILLUMINA;Paired;;SRX755776;296916444;99	SAL_DA0426AA	Human	Human	Human; Homo sapiens	2012	6			Europe	United Kingdom			London		51.5	0	Typhimurium	I			Public Health England - Gastrointestinal Bacteria Reference Unit			PRJNA248792	SRP042645	SAMN03169638	SRS741006	2015-08-27	2014-11-16	21426	21426	21426	21426	6912	2	2	2	2	2	2	2	2	2
SAL_DA0475AA	H120780373	PHE	SRR1646248;ILLUMINA;Paired;;SRX755669;246801258;99	SAL_DA0475AA	Human	Human	Human; Homo sapiens	2012	2											Typhimurium	I			Public Health England - Gastrointestinal Bacteria Reference Unit			PRJNA248792	SRP042645	SAMN03169589	SRS740899	2015-08-27	2014-11-16	21383	21383	21383	1349	2	2	2	2	2	2	2	2	2	2
SAL_DA0501AA	H124620574	PHE	SRR1646207;ILLUMINA;Paired;;SRX755627;273408696;99	SAL_DA0501AA	Human	Human	Human; Homo sapiens	2012	11			Europe	United Kingdom			London		51.5	0	Typhimurium	I			Public Health England - Gastrointestinal Bacteria Reference Unit			PRJNA248792	SRP042645	SAMN03169560	SRS740857	2015-08-27	2014-11-16	21357	21357	21357	21357	12652	269	269	2	2	2	2	2	2	2
SAL_DA0514AA	H125060665	PHE	SRR1646194;ILLUMINA;Paired;;SRX755614;224973936;99	SAL_DA0514AA	Human	Human	Human; Homo sapiens	2012	12			Europe	United Kingdom	England						Typhimurium	I			Public Health England - Gastrointestinal Bacteria Reference Unit			PRJNA248792	SRP042645	SAMN03169545	SRS740844	2015-08-27	2014-11-16	21346	21346	1954	1891	1891	269	269	2	2	2	2	2	2	2
SAL_DA0549AA	H124000548	PHE	SRR1646147;ILLUMINA;Paired;;SRX755567;307675368;99	SAL_DA0549AA	Human	Human	Human; Homo sapiens	2012	10			Europe	United Kingdom							Typhimurium	I			Public Health England - Gastrointestinal Bacteria Reference Unit			PRJNA248792	SRP042645	SAMN03169512	SRS740798	2015-08-27	2014-11-16	21314	21314	21314	21314	21314	2	2	2	2	2	2	2	2	2
SAL_DA0577AA	H123720527	PHE	SRR1646119;ILLUMINA;Paired;;SRX755539;274071996;99	SAL_DA0577AA	Human	Human	Human; Homo sapiens	2012	9			Europe	United Kingdom	England						Typhimurium	I			Public Health England - Gastrointestinal Bacteria Reference Unit			PRJNA248792	SRP042645	SAMN03169485	SRS740769	2015-08-27	2014-11-16	21289	21289	21289	21289	21289	21289	269	2	2	2	2	2	2	2
SAL_DA0638AA	H123900526	PHE	SRR1646057;ILLUMINA;Paired;;SRX755477;350076776;98	SAL_DA0638AA	Human	Human	Human; Homo sapiens	2012	9			Europe	United Kingdom	England						Typhimurium	I			Public Health England - Gastrointestinal Bacteria Reference Unit			PRJNA248792	SRP042645	SAMN03169351	SRS740707	2015-08-27	2014-11-16	21233	20772	20772	302	2	2	2	2	2	2	2	2	2	2
SAL_DA0650AA	H124800653	PHE	SRR1646023;ILLUMINA;Paired;;SRX755443;297097780;98	SAL_DA0650AA	Human	Human	Human; Homo sapiens	2012	11			Europe	United Kingdom	England						Typhimurium	I			Public Health England - Gastrointestinal Bacteria Reference Unit			PRJNA248792	SRP042645	SAMN03169339	SRS740675	2015-08-27	2014-11-16	21221	21221	2275	2275	2275	2	2	2	2	2	2	2	2	2
SAL_DA0677AA	H121760546	PHE	SRR1645996;ILLUMINA;Paired;;SRX755416;305345264;98	SAL_DA0677AA	ND	ND	Other	2012	4			Europe	United Kingdom			London		51.5	0	Typhimurium	I			Public Health England - Gastrointestinal Bacteria Reference Unit			PRJNA248792	SRP042645	SAMN03169311	SRS740647	2015-08-27	2014-11-16	21194	21194	20738	20738	2	2	2	2	2	2	2	2	2	2
SAL_DA0736AA	H122020500	PHE	SRR1645937;ILLUMINA;Paired;;SRX755357;360722736;99	SAL_DA0736AA	Human	Human	Human; Homo sapiens	2012	5			Europe	United Kingdom							Typhimurium	I			Public Health England - Gastrointestinal Bacteria Reference Unit			PRJNA248792	SRP042645	SAMN03169237	SRS740588	2015-08-27	2014-11-16	21139	21139	20817	5289	2	2	2	2	2	2	2	2	2	2
SAL_DA0738AA	H123460446	PHE	SRR1645935;ILLUMINA;Paired;;SRX755355;353464848;99	SAL_DA0738AA	Human	Human	Human; Homo sapiens	2012	8			Europe	United Kingdom	England						Typhimurium	I			Public Health England - Gastrointestinal Bacteria Reference Unit			PRJNA248792	SRP042645	SAMN03169234	SRS740586	2015-08-27	2014-11-16	21137	21137	20679	302	2	2	2	2	2	2	2	2	2	2
SAL_DA0798AA	H123600554	PHE	SRR1645875;ILLUMINA;Paired;;SRX755295;501280956;99	SAL_DA0798AA	Human	Human	Human; Homo sapiens	2012	9			Europe	United Kingdom	Wales						Typhimurium	I			Public Health England - Gastrointestinal Bacteria Reference Unit			PRJNA248792	SRP042645	SAMN03169163	SRS740526	2015-08-27	2014-11-16	21081	21081	2383	307	307	2	2	2	2	2	2	2	2	2
SAL_DA0888AA	H123160659	PHE	SRR1645777;ILLUMINA;Paired;;SRX755197;207369954;99	SAL_DA0888AA	Human	Human	Human; Homo sapiens	2012	8			Europe	United Kingdom			London		51.5	0	Typhimurium	I			Public Health England - Gastrointestinal Bacteria Reference Unit			PRJNA248792	SRP042645	SAMN03169042	SRS740429	2015-08-27	2014-11-16	20997	20997	20997	20997	1471	269	269	2	2	2	2	2	2	2
SAL_DA1175AA	H124620578	PHE	SRR1645272;ILLUMINA;Paired;;SRX754734;222997040;98	SAL_DA1175AA	Human	Human	Human; Homo sapiens	2012	11			Europe	United Kingdom			London		51.5	0	Typhimurium	I			Public Health England - Gastrointestinal Bacteria Reference Unit			PRJNA248792	SRP042645	SAMN03168697	SRS739966	2015-08-27	2014-11-16	20732	20732	20732	20732	20732	2	2	2	2	2	2	2	2	2
SAL_DA1267AA	H124000576	PHE	SRR1645174;ILLUMINA;Paired;;SRX754640;209609928;99	SAL_DA1267AA	Human	Human	Human; Homo sapiens	2012	10			Europe	United Kingdom			London		51.5	0	Typhimurium	I			Public Health England - Gastrointestinal Bacteria Reference Unit			PRJNA248792	SRP042645	SAMN03168554	SRS739874	2015-08-27	2014-11-16	20645	20645	20645	20645	1499	269	269	2	2	2	2	2	2	2
SAL_DA1801AA	H125040565	PHE	SRR1635082;ILLUMINA;Paired;;SRX747383;277947450;99	SAL_DA1801AA	Human	Human	Human; Homo sapiens	2012	12											Typhimurium	I			Public Health England - Gastrointestinal Bacteria Reference Unit			PRJNA248792	SRP042645	SAMN03152377	SRS733748	2015-08-27	2014-11-05	20184	20184	20184	20184	20184	2	2	2	2	2	2	2	2	2
SAL_DA3333AA	CFSAN023615	PHE	SRR1573113;ILLUMINA;Paired;500;SRX699081;433717584;237	SAL_DA3333AA				2007	2			North America	United States	Washington						Typhimurium (Predicted)				Food and Drug Administration - Center for Food Safety and Applied Nutrition (US)			PRJNA186035	SRP018785	SAMN03002037	SRS699107	2015-08-27	2014-09-10	19033	19033	18881	18881	18881	18881	18881	2	2	2	2	2	2	2
SAL_DA3335AA	CFSAN023611	PHE	SRR1573111;ILLUMINA;Paired;500;SRX699079;473877030;235	SAL_DA3335AA				2006	12			North America	United States	Washington						Typhimurium (Predicted)				Food and Drug Administration - Center for Food Safety and Applied Nutrition (US)			PRJNA186035	SRP018785	SAMN03002033	SRS699105	2015-08-27	2014-09-10	19031	18902	18881	18881	18881	18881	18881	2	2	2	2	2	2	2
SAL_DA3428AA	IEH-NGS-SAL-01262	PHE	SRR1569750;ILLUMINA;Paired;500;SRX696187;169289436;239	SAL_DA3428AA				2007	1			North America	United States	Washington						Typhimurium (Predicted)				Food and Drug Administration - Center for Food Safety and Applied Nutrition (US)			PRJNA186035	SRP018785	SAMN03002024	SRS697280	2015-08-27	2014-09-08	18948	18948	18881	18881	18881	18881	18881	2	2	2	2	2	2	2
SAL_DA3496AA	IEH-NGS-SAL-01266	PHE	SRR1569669;ILLUMINA;Paired;500;SRX696105;356309760;240	SAL_DA3496AA				2007	1			North America	United States	Washington						Typhimurium (Predicted)				Food and Drug Administration - Center for Food Safety and Applied Nutrition (US)			PRJNA186035	SRP018785	SAMN03002028	SRS697208	2015-08-27	2014-09-08	18902	18902	18881	18881	18881	18881	18881	2	2	2	2	2	2	2
SAL_DA3528AA	CFSAN023608	PHE	SRR1569633;ILLUMINA;Paired;500;SRX696069;378482838;237	SAL_DA3528AA				2006	12			North America	United States	Washington						Typhimurium (Predicted)				Food and Drug Administration - Center for Food Safety and Applied Nutrition (US)			PRJNA186035	SRP018785	SAMN03002030	SRS697173	2015-08-27	2014-09-08	18882	18881	18881	18881	18881	18881	18881	2	2	2	2	2	2	2
SAL_DA3529AA	CFSAN023604	PHE	SRR1569632;ILLUMINA;Paired;500;SRX696068;190751720;236	SAL_DA3529AA				2007	1			North America	United States	Washington						Typhimurium (Predicted)				Food and Drug Administration - Center for Food Safety and Applied Nutrition (US)			PRJNA186035	SRP018785	SAMN03002026	SRS697172	2015-08-27	2014-09-08	18881	18881	18881	18881	18881	18881	18881	2	2	2	2	2	2	2
SAL_DA4734AA	S03549-09	PHE	ERR024953;ILLUMINA;Paired;260;ERX009719;167441040;72	SAL_DA4734AA																Typhimurium (Predicted)				The Wellcome Trust Sanger Institute			PRJEB2132	ERP000186	SAMEA788105	ERS008979	2015-08-27	2011-03-18	17933	17933	17933	17933	2	2	2	2	2	2	2	2	2	2
SAL_DA4826AA	DT7	PHE	ERR024404;ILLUMINA;Paired;242;ERX009662;327831776;76	SAL_DA4826AA	Human	Human	Faeces	2009				Europe	United Kingdom							Typhimurium	I			The Wellcome Trust Sanger Institute			PRJEB2059	ERP000113	SAMEA788810	ERS007590	2015-08-27	2011-03-18	17850	17850	17850	17850	17850	17850	2	2	2	2	2	2	2	2
SAL_DA4865AA	DT177	PHE	ERR024394;ILLUMINA;Paired;239;ERX009659;161654280;76	SAL_DA4865AA	Human	Human	Faeces	2008				Europe	United Kingdom							Typhimurium	I			The Wellcome Trust Sanger Institute			PRJEB2059	ERP000113	SAMEA788677	ERS007572	2015-08-27	2011-03-18	17821	17821	17821	17821	17821	269	269	2	2	2	2	2	2	2
SAL_DA5132AA	MDH-2014-00391	PHE	SRR1539626;ILLUMINA;Paired;500;SRX672523;545132790;235	SAL_DA5132AA	Livestock	Swine	Porcine Liver	2003	1			North America	United States	North Carolina						Typhimurium	I			Food and Drug Administration - Center for Food Safety and Applied Nutrition (US)			PRJNA215333	SRP032981	SAMN02699557	SRS677008	2015-08-27	2014-08-08	17602	17602	17602	17602	17602	17602	3610	2	2	2	2	2	2	2
SAL_DA5907AA	2013K-0676	PHE	SRR10212326;OXFORD_NANOPORE;Single;;SRX6932012;;	SRR1503245;ILLUMINA;Paired;500;SRX643203;241551350;149	SAL_DA5907AA	Human	Human	Stool; Age: 50-59	2013	4			North America	United States							I 4	[5]	12:I:-				Centers for Disease Control and Prevention - PulseNet			PRJNA230403	SRP040281	SAMN02867576	SRS651998	2015-08-27	2014-10-10	16942	16942	6	6	2	2	2	2	2	2	2	2	2	2
SAL_DA7337AA	MDH-2014-00069	PHE	SRR1272873;ILLUMINA;Paired;500;SRX534252;315482400;240	SAL_DA7337AA	Livestock	Swine	Porcine Tissue	2003	10			North America	United States	Arkansas						Typhimurium	I			Food and Drug Administration - Center for Food Safety and Applied Nutrition (US)			PRJNA215333	SRP032981	SAMN02646843	SRS602979	2015-08-27	2014-05-06	15734	15734	15734	15734	15734	15734	3610	2	2	2	2	2	2	2
SAL_DA8211AA	SO5416_06-sc-2010-09-20-980679	PHE	ERR029214;ILLUMINA;Paired;283;ERX010229;258351120;72	SAL_DA8211AA																Typhimurium (Predicted)				The Wellcome Trust Sanger Institute			PRJEB2059	ERP000113	SAMEA788825	ERS015657	2015-08-27	2011-03-18	15015	15015	15015	15015	15015	15015	2	2	2	2	2	2	2	2
SAL_DA8346AA	S06221_07-sc-2010-09-20-980645	PHE	ERR028304;ILLUMINA;Paired;272;ERX010065;490818032;76	SAL_DA8346AA																Typhimurium (Predicted)				The Wellcome Trust Sanger Institute			PRJEB2059	ERP000113	SAMEA788915	ERS015623	2015-08-27	2011-03-18	14885	14885	14885	14885	14885	14885	14885	2	2	2	2	2	2	2
SAL_DA8568AA	VA_WGS-00141	PHE	SRR1212306;ILLUMINA;Paired;500;SRX506588;408023040;240	SAL_DA8568AA	Livestock	Swine	Pig; Pig	2006	6			North America	United States	Virginia						Typhimurium	I			Food and Drug Administration - Center for Food Safety and Applied Nutrition (US)			PRJNA219491	SRP033708	SAMN02403362	SRS585674	2015-08-27	2014-04-01	14694	14694	14694	14694	14694	14694	14694	2	2	2	2	2	2	2
SAL_EA0964AA	ASERH116465-sc-2013-02-28T11:34:38Z-1570915	PHE	ERR304818;ILLUMINA;Paired;203;ERX278159;626533000;100	SAL_EA0964AA																Typhimurium	I			The Wellcome Trust Sanger Institute			PRJEB1271	ERP002103	SAMEA1920577	ERS218074	2015-08-27	2013-06-30	12652	12652	12652	12652	12652	269	269	2	2	2	2	2	2	2
SAL_EA1522AA	PNUSAS000715	PHE	SRR2194005;ILLUMINA;Paired;;SRX1168242;285641806;239	SAL_EA1522AA	ND	ND	Age: 20-29; Stool	2015	7			North America	United States							I 4	[5]	12:I:-				Centers for Disease Control and Prevention - PulseNet			PRJNA230403	SRP040281	SAMN03976030	SRS1048005	2015-09-03	2015-08-28	12301	12301	5544	6	2	2	2	2	2	2	2	2	2	2
SAL_EA1645AA	PNUSAS000606	PHE	SRR2192102;ILLUMINA;Paired;;SRX1167165;454212644;223	SAL_EA1645AA	ND	ND	Age: 0-4; Stool	2015	6			North America	United States							I 4	[5]	12:I:-				Centers for Disease Control and Prevention - PulseNet			PRJNA230403	SRP040281	SAMN03940867	SRS1047104	2015-09-03	2015-08-25	12200	12200	5544	6	2	2	2	2	2	2	2	2	2	2
SAL_EA2638AA	WAPHL_SAL-A00849	PHE	SRR2532791;ILLUMINA;Paired;500;SRX1293855;517364176;232	SAL_EA2638AA	Livestock	Swine	pork chop	2006				North America	United States	New York		New York				Typhimurium var. O5 - (Copenhagen)	I			Food and Drug Administration (US)			PRJNA183851	SRP028334	SAMN03291678	SRS1092789	2015-10-01	2015-10-01	11416	11416	11416	11416	11416	11416	3610	2	2	2	2	2	2	2
SAL_EA3042AA	FSIS1502800	PHE	SRR2648752;ILLUMINA;Paired;300;SRX1335467;677299590;135	SAL_EA3042AA	Livestock	Swine	Animal-Swine-Market Swine	2015				North America	United States	Oklahoma						Typhimurium				Department of Agriculture - Food Safety and Inspection Service (US)			PRJNA292666	SRP062916	SAMN04166361	SRS1114292	2015-10-16	2015-10-14	11084	11084	11084	11084	11084	11084	3610	2	2	2	2	2	2	2
SAL_EA4403AA	S10-1526	PHE	traces-0kFpRCy;ILLUMINA;Paired;;NA;;	SAL_EA4403AA	Food			2010												Typhimurium				F.X.Weill	Institut Pasteur							2015-11-02	2016-05-02	9928	9928	9928	9928	9928	2	2	2	2	2	2	2	2	2
SAL_EA4488AA	STM 80-65	PHE	traces-0cXcgPE;ILLUMINA;Paired;;NA;;	SAL_EA4488AA	Food			1965				Europe	Portugal							Typhimurium				F.X.Weill	Institut Pasteur							2015-11-03	2016-05-03	9844	9844	9844	9844	9844	9844	3610	2	2	2	2	2	2	2
SAL_EA4509AA	10-0247	PHE	traces-0XUhQod;ILLUMINA;Paired;;NA;;	SAL_EA4509AA				2010				Europe	France							Typhimurium				F.X.Weill	Institut Pasteur							2015-11-04	2016-05-04	9823	9823	9823	9823	1471	269	269	2	2	2	2	2	2	2
SAL_EA4516AA	7015-02-01	PHE	traces-0uYQpek;ILLUMINA;Paired;;NA;;	SAL_EA4516AA	Human			2002				Europe	France							Typhimurium				F.X.Weill	Institut Pasteur	DT104var3						2015-11-04	2016-05-04	9817	9817	9817	9817	9817	9817	269	2	2	2	2	2	2	2
SAL_EA4521AA	STM 69-67	PHE	traces-0wbSbYt;ILLUMINA;Paired;;NA;;	SAL_EA4521AA	Food			1967				Europe	Portugal							Typhimurium				F.X.Weill	Institut Pasteur							2015-11-04	2016-05-04	9812	9812	9812	9812	9812	9812	3610	2	2	2	2	2	2	2
SAL_EA4573AA	S09-1581	PHE	traces-0JKbHPR;ILLUMINA;Paired;;NA;;	SAL_EA4573AA	Human			2009				Asia	China							Typhimurium monophasic				F.X.Weill	Institut Pasteur		monophasic					2015-11-04	2016-05-04	9763	9763	9763	9763	9763	9763	2	2	2	2	2	2	2	2
SAL_EA4961AA	ADRDL-14-20931	PHE	SRR2911781;ILLUMINA;Paired;500;SRX1424790;165020416;176	SAL_EA4961AA	Livestock	Bovine	bovine pooled tissue; Bos taurus	2014	11			North America	United States	Minnesota						Typhimurium	I			Food and Drug Administration - Center for Food Safety and Applied Nutrition (US)			PRJNA280335	SRP059853	SAMN03734340	SRS1157088	2015-11-11	2015-01-01	9449	9449	9449	271	269	269	269	2	2	2	2	2	2	2
SAL_EA5957AA	ADRDL-15-1363	PHE	SRR2976806;ILLUMINA;Paired;500;SRX1466213;456853920;240	SAL_EA5957AA	Livestock	Swine	Sus scrofa; swine feces	2015				North America	United States	Minnesota						I 4	5	12:I:-				Food and Drug Administration - Center for Food Safety and Applied Nutrition (US)			PRJNA280335	SRP059853	SAMN04240676	SRS1192341	2015-12-12	2015-01-01	8648	8648	8648	6	2	2	2	2	2	2	2	2	2	2
SAL_EA7016AA	7432	PHE	SRR3049815;ILLUMINA;Paired;;SRX1498763;187750656;96	SAL_EA7016AA	Human	Human	Human; Homo sapiens					Europe	United Kingdom							Typhimurium	serovar Typhimurium UK 1 uid87049			Public Health England			PRJNA248792	SRP042645	SAMN04364058	SRS1220409	2015-12-23	2015-12-22	7803	7803	7803	7803	7803	7803	2	2	2	2	2	2	2	2
SAL_EA7080AA	25178	PHE	SRR3049727;ILLUMINA;Paired;;SRX1498682;131702880;93	SAL_EA7080AA	Human	Human	Human; Homo sapiens					Europe	United Kingdom							Typhimurium	I			Public Health England			PRJNA248792	SRP042645	SAMN04363994	SRS1220328	2015-12-23	2015-12-22	7742	7742	7742	7742	2	2	2	2	2	2	2	2	2	2
SAL_EA7210AA	29233	PHE	SRR3049571;ILLUMINA;Paired;;SRX1498529;178607790;95	SAL_EA7210AA	Human	Human	Human; Homo sapiens					Europe	United Kingdom							Typhimurium	I			Public Health England			PRJNA248792	SRP042645	SAMN04363863	SRS1220181	2015-12-23	2015-12-22	7618	7618	7618	7618	7618	269	269	2	2	2	2	2	2	2
SAL_EA7286AA	21082	PHE	SRR3049492;ILLUMINA;Paired;;SRX1498449;255572108;97	SAL_EA7286AA	Human	Human	Human; Homo sapiens					Europe	United Kingdom							Typhimurium	I			Public Health England			PRJNA248792	SRP042645	SAMN04363787	SRS1220093	2015-12-23	2015-12-22	7547	6793	6793	6793	2	2	2	2	2	2	2	2	2	2
SAL_EA7404AA	1492	PHE	SRR3049370;ILLUMINA;Paired;;SRX1498328;327679488;94	SAL_EA7404AA	Human	Human	Human; Homo sapiens					Europe	United Kingdom							Typhimurium (Predicted)	serovar Typhimurium UK 1 uid87049			Public Health England			PRJNA248792	SRP042645	SAMN04363666	SRS1219984	2015-12-23	2015-12-22	7439	7439	7439	271	269	269	269	2	2	2	2	2	2	2
SAL_EA7462AA	21081	PHE	SRR3049309;ILLUMINA;Paired;;SRX1498266;221505902;97	SAL_EA7462AA	Human	Human	Human; Homo sapiens					Europe	United Kingdom							Typhimurium	I			Public Health England			PRJNA248792	SRP042645	SAMN04363603	SRS1219918	2015-12-23	2015-12-22	7386	7386	7386	7386	7386	2	2	2	2	2	2	2	2	2
SAL_EA7567AA	60162	PHE	SRR3049202;ILLUMINA;Paired;;SRX1498159;127326856;97	SAL_EA7567AA	Human	Human	Human; Homo sapiens					Europe	United Kingdom							Typhimurium	I			Public Health England			PRJNA248792	SRP042645	SAMN04363444	SRS1219797	2015-12-23	2015-12-22	7282	7282	7282	7282	2	2	2	2	2	2	2	2	2	2
SAL_EA7583AA	20919	PHE	SRR3049186;ILLUMINA;Paired;;SRX1498142;259237632;96	SAL_EA7583AA	Human	Human	Human; Homo sapiens					Europe	United Kingdom							Typhimurium	I			Public Health England			PRJNA248792	SRP042645	SAMN04363427	SRS1219791	2015-12-23	2015-12-22	7266	7266	7266	7266	2	2	2	2	2	2	2	2	2	2
SAL_EA7692AA	21079	PHE	SRR3049077;ILLUMINA;Paired;;SRX1498027;184007642;97	SAL_EA7692AA	Human	Human	Human; Homo sapiens					Europe	United Kingdom							Typhimurium	I			Public Health England			PRJNA248792	SRP042645	SAMN04363312	SRS1219683	2015-12-23	2015-12-22	7160	7160	6781	302	2	2	2	2	2	2	2	2	2	2
SAL_EA7728AA	98277	PHE	SRR3049041;ILLUMINA;Paired;;SRX1497991;394923278;97	SAL_EA7728AA	Human	Human	Human; Homo sapiens					Europe	United Kingdom							Typhimurium	I			Public Health England			PRJNA248792	SRP042645	SAMN04363274	SRS1219652	2015-12-23	2015-12-22	7126	7126	7126	7126	2	2	2	2	2	2	2	2	2	2
SAL_EA7774AA	77342	PHE	SRR3048988;ILLUMINA;Paired;;SRX1497938;326955420;99	SAL_EA7774AA	Human	Human	Human; Homo sapiens					Europe	United Kingdom							Typhimurium (Predicted)	I			Public Health England			PRJNA248792	SRP042645	SAMN04363228	SRS1219592	2015-12-23	2015-12-22	7081	7081	2321	302	2	2	2	2	2	2	2	2	2	2
SAL_EA7857AA	60113	PHE	SRR3048893;ILLUMINA;Paired;;SRX1497843;247236510;97	SAL_EA7857AA	Human	Human	Human; Homo sapiens					Europe	United Kingdom							Typhimurium	I			Public Health England			PRJNA248792	SRP042645	SAMN04363145	SRS1219495	2015-12-23	2015-12-22	7001	7001	1679	1679	1471	269	269	2	2	2	2	2	2	2
SAL_EA7951AA	53070	PHE	SRR3048796;ILLUMINA;Paired;;SRX1497748;308422656;96	SAL_EA7951AA	Human	Human	Human; Homo sapiens					Europe	United Kingdom							Typhimurium	I			Public Health England			PRJNA248792	SRP042645	SAMN04363047	SRS1219395	2015-12-23	2015-12-22	6912	6912	6912	6912	6912	2	2	2	2	2	2	2	2	2
SAL_EA7987AA	98270	PHE	SRR3048757;ILLUMINA;Paired;;SRX1497711;366529016;98	SAL_EA7987AA	Human	Human	Human; Homo sapiens					Europe	United Kingdom							Typhimurium	I			Public Health England			PRJNA248792	SRP042645	SAMN04363011	SRS1219479	2015-12-23	2015-12-22	6877	6877	6877	6877	2	2	2	2	2	2	2	2	2	2
SAL_EA8058AA	20920	PHE	SRR3048571;ILLUMINA;Paired;;SRX1497601;254716032;96	SAL_EA8058AA	Human	Human	Human; Homo sapiens					Europe	United Kingdom							Typhimurium	I			Public Health England			PRJNA248792	SRP042645	SAMN04362939	SRS1219264	2015-12-23	2015-12-22	6809	6809	6809	1891	1891	269	269	2	2	2	2	2	2	2
SAL_EA8073AA	29290	PHE	SRR3048555;ILLUMINA;Paired;;SRX1497582;227777340;97	SAL_EA8073AA	Human	Human	Human; Homo sapiens					Europe	United Kingdom							Typhimurium	I			Public Health England			PRJNA248792	SRP042645	SAMN04362924	SRS1219257	2015-12-23	2015-12-22	6794	6794	6794	6794	6794	2	2	2	2	2	2	2	2	2
SAL_EA8082AA	7416	PHE	SRR3048544;ILLUMINA;Paired;;SRX1497572;138244570;95	SAL_EA8082AA	Human	Human	Human; Homo sapiens					Europe	United Kingdom							Typhimurium	I			Public Health England			PRJNA248792	SRP042645	SAMN04362915	SRS1219236	2015-12-23	2015-12-22	6785	6785	6785	6785	1499	269	269	2	2	2	2	2	2	2
SAL_EA8392AA	FSIS1503611	PHE	SRR3062668;ILLUMINA;Paired;300;SRX1506844;306558144;136	SAL_EA8392AA	Livestock	Bovine	Animal-Cattle-Heifer	2015				North America	United States	California						Typhimurium	I			Department of Agriculture - Food Safety and Inspection Service (US)			PRJNA292666	SRP062916	SAMN04376242	SRS1227710	2016-01-05	2015-12-29	6532	6532	271	271	269	269	269	2	2	2	2	2	2	2
SAL_EA8775AA	FSIS1504679	PHE	SRR3098374;ILLUMINA;Paired;300;SRX1528360;270923968;136	SAL_EA8775AA	Livestock	Bovine	Animal-Cattle-Dairy Cow	2015				North America	United States	Utah						Typhimurium	I			Department of Agriculture - Food Safety and Inspection Service (US)			PRJNA292666	SRP062916	SAMN04396259	SRS1245985	2016-01-12	2016-01-12	6225	6225	271	271	269	269	269	2	2	2	2	2	2	2
SAL_EA8969AA	23029837	PHE	SRR3110494;ILLUMINA;Paired;500;SRX1538110;85786148;238	SRR3131114;ILLUMINA;Paired;500;SRX1550746;;	SAL_EA8969AA	Livestock	Swine	Sus domesticus; Liver	2015	1			North America	United States	Iowa						I 4	5	12:I:-				Food and Drug Administration - Center for Food Safety and Applied Nutrition (US)			PRJNA215333	SRP032981	SAMN04388315	SRS1254757	2016-01-21	2015-01-01	6082	6082	6082	6082	6082	6082	2	2	2	2	2	2	2	2
SAL_EA9423AA	PNUSAS001396	PHE	SRR3137126;ILLUMINA;Paired;;SRX1555634;278267400;225	SAL_EA9423AA								North America	United States							Typhimurium (Predicted)				Center for Diease Control and Prevention - Enteric Diseases Laboratory Branch (US)			PRJNA230403	SRP040281	SAMN04417420	SRS1271264	2016-02-03	2016-02-01	5711	5711	5711	6	2	2	2	2	2	2	2	2	2	2
SAL_EA9429AA	PNUSAS001472	PHE	SRR3137113;ILLUMINA;Paired;;SRX1555627;655726752;216	SAL_EA9429AA	ND	ND	Stool; Age: 50-59	2016	1			North America	United States							I 4	[5]	12:I:-				Center for Diease Control and Prevention - Enteric Diseases Laboratory Branch (US)			PRJNA230403	SRP040281	SAMN04438319	SRS1271250	2016-02-03	2016-02-01	5705	5705	5705	6	2	2	2	2	2	2	2	2	2	2
SAL_EA9466AA	22748021	PHE	SRR3136821;ILLUMINA;Paired;500;SRX1555399;291147360;240	SAL_EA9466AA	Poultry	Avian	Meleagris gallopavo; Tissue Pool	2014	11			North America	United States	Minnesota						Typhimurium (Predicted)				Food and Drug Administration - Center for Food Safety and Applied Nutrition (US)			PRJNA215333	SRP032981	SAMN04388347	SRS1271125	2016-02-03	2015-01-01	5671	2633	2633	2633	2	2	2	2	2	2	2	2	2	2
SAL_EA9717AA	33676	PHE	GCF_001293505;Complete Genome;;;;;	SAL_EA9717AA	Human	Human	Homo sapiens; female; blood-culture; Age: fifteen years; female; blood	2011				North America	Mexico	Federal District		Mexico City		19.43	-99.13	Typhimurium	I			Universidad Nacional Autanoma de Mexico - Instituto de Biotecnologia			PRJNA224116		SAMN03795193		2016-02-08	2015-09-17	5525	5525	5525	5525	5525	5525	5525	2	2	2	2	2	2	2
SAL_EA9731AA	YU39	PHE	GCF_001006525;Complete Genome;;;;;	SAL_EA9731AA	Human	Human	Homo sapiens; blood-culture; Age: eight years; male; blood	2005				North America	Mexico	Yucatan				20.57	-89.39	Typhimurium	I			Centro de Ciencias Genomicas - UNAM			PRJNA224116		SAMN03653812		2016-02-08	2015-05-14	5511	5511	5511	5511	5511	3610	3610	2	2	2	2	2	2	2
SAL_FA0202AA	S04677_13-sc-2416759	PHE	ERR1251553;ILLUMINA;Paired;510;ERX1323162;891049250;125	SAL_FA0202AA																Typhimurium (Predicted)				The Wellcome Trust Sanger Institute			PRJEB10999	ERP012313	SAMEA3593595	ERS900744	2016-02-10	2016-02-10	41435	41435	41435	41435	1375	2	2	2	2	2	2	2	2	2
SAL_FA0223AA	L00246_08-sc-2416675	PHE	ERR1251532;ILLUMINA;Paired;497;ERX1323141;756165750;125	SAL_FA0223AA																Typhimurium (Predicted)				The Wellcome Trust Sanger Institute			PRJEB10999	ERP012313	SAMEA3593514	ERS900663	2016-02-10	2016-02-10	41434	41434	41434	41434	17848	2	2	2	2	2	2	2	2	2
SAL_FA0311AA	L00164_13-sc-2416741	PHE	ERR1251444;ILLUMINA;Paired;507;ERX1323053;558958250;125	SAL_FA0311AA																Typhimurium (Predicted)				The Wellcome Trust Sanger Institute			PRJEB10999	ERP012313	SAMEA3593578	ERS900727	2016-02-10	2016-02-10	5038	5038	5038	5038	5038	2	2	2	2	2	2	2	2	2
SAL_FA0365AA	S02159_07-sc-2416653	PHE	ERR1251390;ILLUMINA;Paired;507;ERX1322999;524394000;125	SAL_FA0365AA																Typhimurium (Predicted)				The Wellcome Trust Sanger Institute			PRJEB10999	ERP012313	SAMEA3593492	ERS900641	2016-02-10	2016-02-10	4984	4984	4984	4984	4984	2	2	2	2	2	2	2	2	2
SAL_FA0765AA	CFSAN045658	PHE	SRR3182399;ILLUMINA;Paired;500;SRX1596532;338005768;292	SRR3182227;ILLUMINA;Paired;500;SRX1596463;338005768;292	SAL_FA0765AA	Poultry	Avian	Chicken	2015	4			North America	United States	Indiana						Typhimurium (Predicted)				Food and Drug Administration - Center for Food Safety and Applied Nutrition (US)			PRJNA186035	SRP018785	SAMN04451116	SRS1306566	2016-02-23	2015-01-01	4648	4648	271	271	269	269	269	2	2	2	2	2	2	2
SAL_FA1690AA	CFSAN033939	PHE	SRR3215422;ILLUMINA;Paired;500;SRX1622116;214826892;238	SAL_FA1690AA	ND	ND	Final product sales (animal origin)	2013				South America	Brazil							Typhimurium	I			Food and Drug Administration - Center for Food Safety and Applied Nutrition (US)			PRJNA186035	SRP018785	SAMN03941171	SRS1332209	2016-03-14	2015-01-01	3862	3862	3862	3862	3862	3862	269	2	2	2	2	2	2	2
SAL_FA1777AA	SSI_AA442	PHE	traces-0SNUWfP;ILLUMINA;Paired;;NA;199288086;237	SAL_FA1777AA	Human			2014				Europe	Denmark							Typhimurium				E. Litrup (SSI)							2016-03-15	2016-09-13	3786	3786	3489	302	2	2	2	2	2	2	2	2	2	2
SAL_FA1945AA	PNUSAS001429	PHE	SRR3232068;ILLUMINA;Paired;;SRX1637774;312204414;241	SAL_FA1945AA	ND	ND						North America	United States							Typhimurium (Predicted)				Center for Diease Control and Prevention - Enteric Diseases Laboratory Branch (US)			PRJNA230403	SRP040281	SAMN04526240	SRS1344084	2016-03-17	2016-03-16	3648	3648	3647	3610	3610	3610	3610	2	2	2	2	2	2	2
SAL_FA1946AA	PNUSAS001428	PHE	SRR3232066;ILLUMINA;Paired;;SRX1637771;344226608;242	SAL_FA1946AA	ND	ND						North America	United States							Typhimurium (Predicted)				Center for Diease Control and Prevention - Enteric Diseases Laboratory Branch (US)			PRJNA230403	SRP040281	SAMN04526239	SRS1344080	2016-03-17	2016-03-16	3647	3647	3647	3610	3610	3610	3610	2	2	2	2	2	2	2
SAL_FA2010AA	PNUSAS001430	PHE	SRR3233166;ILLUMINA;Paired;;SRX1638872;201108272;232	SAL_FA2010AA	ND	ND						North America	United States							Typhimurium (Predicted)				Centers for Disease Control and Prevention - PulseNet			PRJNA230403	SRP040281	SAMN04526241	SRS1345345	2016-03-17	2016-03-16	3610	3610	3610	3610	3610	3610	3610	2	2	2	2	2	2	2
SAL_FA2473AA	CFSAN047862	PHE	SRR3286874;ILLUMINA;Paired;500;SRX1657310;292194550;295	SAL_FA2473AA	Livestock	Bovine	Beef	2015	9			North America	United States	Minnesota						Typhimurium (Predicted)				Food and Drug Administration - Center for Food Safety and Applied Nutrition (US)			PRJNA186035	SRP018785	SAMN04549404	SRS1357539	2016-03-24	2015-01-01	3208	3208	3208	271	269	269	269	2	2	2	2	2	2	2
SAL_FA2474AA	CFSAN047861	PHE	SRR3286873;ILLUMINA;Paired;500;SRX1657309;459174492;294	SAL_FA2474AA	Livestock	Bovine	Beef	2015	9			North America	United States	Minnesota						Typhimurium (Predicted)				Food and Drug Administration - Center for Food Safety and Applied Nutrition (US)			PRJNA186035	SRP018785	SAMN04549403	SRS1357546	2016-03-24	2015-01-01	3208	3208	3208	271	269	269	269	2	2	2	2	2	2	2
SAL_FA2810AA	CVM N57525F	PHE	SRR3295815;ILLUMINA;Paired;;SRX1662727;402677816;271	SAL_FA2810AA	Livestock	Bovine	Dairy Cattle	2014				North America	United States	California						Typhimurium				Food and Drug Administration (US)			PRJNA292666	SRP062916	SAMN04577362	SRS1362146	2016-03-26	2016-03-25	2904	2904	271	271	269	269	269	2	2	2	2	2	2	2
SAL_FA2826AA	CVM N57476F	PHE	SRR3295799;ILLUMINA;Paired;;SRX1662711;355990880;280	SAL_FA2826AA	Livestock	Bovine	Dairy Cattle	2014				North America	United States	California						Typhimurium				Food and Drug Administration (US)			PRJNA292666	SRP062916	SAMN04577346	SRS1362163	2016-03-26	2016-03-25	2888	2888	271	271	269	269	269	2	2	2	2	2	2	2
SAL_FA2854AA	CVM N57380F	PHE	SRR3295771;ILLUMINA;Paired;;SRX1662683;388443840;278	SAL_FA2854AA	ND	ND	Hogs	2014				North America	United States	Georgia						Typhimurium				Food and Drug Administration (US)			PRJNA292666	SRP062916	SAMN04577318	SRS1362191	2016-03-26	2016-03-25	2862	2862	2862	271	269	269	269	2	2	2	2	2	2	2
SAL_FA2856AA	CVM N57366F	PHE	SRR3295769;ILLUMINA;Paired;;SRX1662681;406358446;277	SAL_FA2856AA	Livestock	Swine	Animal-Swine-Sow	2014				North America	United States	Oregon					-111.6	Typhimurium				Food and Drug Administration (US)			PRJNA292666	SRP062916	SAMN04577316	SRS1362193	2016-03-26	2016-03-25	2860	2860	2860	271	269	269	269	2	2	2	2	2	2	2
SAL_FA2906AA	CVM N57210F	PHE	SRR3295719;ILLUMINA;Paired;;SRX1662631;313673736;236	SAL_FA2906AA	Livestock	Swine	Animal-Swine-Sow	2014				North America	United States	Illinois						Typhimurium				Food and Drug Administration (US)			PRJNA292666	SRP062916	SAMN04577266	SRS1362243	2016-03-26	2016-03-25	2810	2810	271	271	269	269	269	2	2	2	2	2	2	2
SAL_FA3500AA	123869	PHE	SRR3286854;ILLUMINA;Paired;;SRX1657527;328869288;99	SAL_FA3500AA	Human	Human	Human; Homo sapiens	2015	6			Europe	United Kingdom							Typhimurium	I			Public Health England			PRJNA248792	SRP042645	SAMN04576507	SRS1357744	2016-03-31	2016-03-24	2373	2373	271	271	269	269	269	2	2	2	2	2	2	2
SAL_FA3619AA	101449	PHE	SRR3286617;ILLUMINA;Paired;;SRX1657366;362640376;98	SAL_FA3619AA	Human	Human	Human; Homo sapiens	2015	4			Europe	United Kingdom							Typhimurium	I			Public Health England			PRJNA248792	SRP042645	SAMN04576299	SRS1357594	2016-03-31	2016-03-24	2275	2275	2275	2275	2275	2	2	2	2	2	2	2	2	2
SAL_FA3685AA	182892	PHE	SRR3285487;ILLUMINA;Paired;;SRX1656355;290758944;98	SAL_FA3685AA	Human	Human	Human; Homo sapiens	2015	11			Europe	United Kingdom							Typhimurium	I			Public Health England			PRJNA248792	SRP042645	SAMN04575365	SRS1356683	2016-03-31	2016-03-24	2215	2215	2215	1375	1375	2	2	2	2	2	2	2	2	2
SAL_FA3720AA	128208	PHE	SRR3285452;ILLUMINA;Paired;;SRX1656320;242611152;98	SAL_FA3720AA	Human	Human	Human; Homo sapiens	2015	6			Europe	United Kingdom							Typhimurium	I			Public Health England			PRJNA248792	SRP042645	SAMN04575098	SRS1356640	2016-03-31	2016-03-24	2188	2188	2188	2188	1471	269	269	2	2	2	2	2	2	2
SAL_FA3881AA	152360	PHE	SRR3284829;ILLUMINA;Paired;;SRX1655914;311627826;97	SAL_FA3881AA	Human	Human	Human; Homo sapiens	2015	8			Europe	United Kingdom							Typhimurium	I			Public Health England			PRJNA248792	SRP042645	SAMN04574757	SRS1356273	2016-03-31	2016-03-24	2049	2049	2049	2049	1471	269	269	2	2	2	2	2	2	2
SAL_FA3885AA	143550	PHE	SRR3284825;ILLUMINA;Paired;;SRX1655899;271472930;97	SAL_FA3885AA	Human	Human	Human; Homo sapiens	2015	8			Europe	United Kingdom							Typhimurium	I			Public Health England			PRJNA248792	SRP042645	SAMN04574753	SRS1356234	2016-03-31	2016-03-24	2046	2046	2046	2046	2046	2	2	2	2	2	2	2	2	2
SAL_FA3899AA	195809	PHE	SRR3284811;ILLUMINA;Paired;;SRX1655855;330821736;98	SAL_FA3899AA	Human	Human	Human; Homo sapiens	2015	12			Europe	United Kingdom							Typhimurium	I			Public Health England			PRJNA248792	SRP042645	SAMN04574739	SRS1356199	2016-03-31	2016-03-24	2033	2033	2033	2033	1471	269	269	2	2	2	2	2	2	2
SAL_FA3924AA	163182	PHE	SRR3284760;ILLUMINA;Paired;;SRX1655811;300003480;98	SAL_FA3924AA	Human	Human	Human; Homo sapiens	2015	9			Europe	United Kingdom							Typhimurium	I			Public Health England			PRJNA248792	SRP042645	SAMN04574713	SRS1356187	2016-03-31	2016-03-24	2012	2012	2012	2012	2012	2	2	2	2	2	2	2	2	2
SAL_FA3931AA	107199	PHE	SRR3284753;ILLUMINA;Paired;;SRX1655804;312380096;98	SAL_FA3931AA	Human	Human	Human; Homo sapiens	2015	4			Europe	United Kingdom							Typhimurium	I			Public Health England			PRJNA248792	SRP042645	SAMN04574706	SRS1356161	2016-03-31	2016-03-24	2005	2005	2005	2005	307	2	2	2	2	2	2	2	2	2
SAL_FA3941AA	187578	PHE	SRR3284743;ILLUMINA;Paired;;SRX1655794;234600436;98	SAL_FA3941AA	Human	Human	Human; Homo sapiens	2015	11			Europe	United Kingdom							Typhimurium	I			Public Health England			PRJNA248792	SRP042645	SAMN04574695	SRS1356147	2016-03-31	2016-03-24	1996	1471	1471	1471	1471	269	269	2	2	2	2	2	2	2
SAL_FA3979AA	152375	PHE	SRR3284693;ILLUMINA;Paired;;SRX1655743;416392870;97	SAL_FA3979AA	Human	Human	Human; Homo sapiens	2015	8			Europe	United Kingdom							Typhimurium	I			Public Health England			PRJNA248792	SRP042645	SAMN04574155	SRS1356109	2016-03-31	2016-03-24	1961	1961	1961	1961	1961	269	269	2	2	2	2	2	2	2
SAL_FA3986AA	152389	PHE	SRR3284686;ILLUMINA;Paired;;SRX1655736;349306104;98	SAL_FA3986AA	Human	Human	Human; Homo sapiens	2015	8			Europe	United Kingdom							Typhimurium	I			Public Health England			PRJNA248792	SRP042645	SAMN04574138	SRS1356111	2016-03-31	2016-03-24	1954	1954	1954	1891	1891	269	269	2	2	2	2	2	2	2
SAL_FA4059AA	133997	PHE	SRR3323064;ILLUMINA;Paired;;SRX1675276;423207314;97	SAL_FA4059AA	Human	Human	Human; Homo sapiens	2015	7			Europe	United Kingdom							Typhimurium	I			Public Health England			PRJNA248792	SRP042645	SAMN04601153	SRS1372071	2016-04-02	2016-04-02	1891	1891	1891	1891	1891	269	269	2	2	2	2	2	2	2
SAL_FA4080AA	180550	PHE	SRR3323042;ILLUMINA;Paired;;SRX1675254;335538714;97	SAL_FA4080AA	Human	Human	Human; Homo sapiens	2015	10			Europe	United Kingdom							Typhimurium	I			Public Health England			PRJNA248792	SRP042645	SAMN04601132	SRS1372031	2016-04-02	2016-04-02	1870	1870	1870	1870	1870	2	2	2	2	2	2	2	2	2
SAL_FA4125AA	204015	PHE	SRR3322987;ILLUMINA;Paired;;SRX1675199;466292232;98	SAL_FA4125AA	Human	Human	Human; Homo sapiens	2016	1			Europe	United Kingdom							Typhimurium monophasic	I			Public Health England			PRJNA248792	SRP042645	SAMN04601074	SRS1371986	2016-04-02	2016-04-02	1833	1833	1833	302	2	2	2	2	2	2	2	2	2	2
SAL_FA4203AA	185949	PHE	SRR3322698;ILLUMINA;Paired;;SRX1675067;396765348;98	SAL_FA4203AA	Human	Human	Human; Homo sapiens	2015	11			Europe	United Kingdom							Typhimurium	I			Public Health England			PRJNA248792	SRP042645	SAMN04600949	SRS1371866	2016-04-02	2016-04-02	1759	1759	1759	1759	1659	2	2	2	2	2	2	2	2	2
SAL_FA4293AA	170462	PHE	SRR3322589;ILLUMINA;Paired;;SRX1674959;430325448;98	SAL_FA4293AA	Human	Human	Human; Homo sapiens	2015	10			Europe	United Kingdom							Typhimurium	I			Public Health England			PRJNA248792	SRP042645	SAMN04600746	SRS1371775	2016-04-02	2016-04-02	1679	1679	1679	1679	1471	269	269	2	2	2	2	2	2	2
SAL_FA4314AA	185429	PHE	SRR3322407;ILLUMINA;Paired;;SRX1674915;276113970;99	SAL_FA4314AA	Human	Human	Human; Homo sapiens	2015	11			Europe	United Kingdom							Typhimurium	I			Public Health England			PRJNA248792	SRP042645	SAMN04600701	SRS1371751	2016-04-02	2016-04-02	1659	1659	1659	1659	1659	2	2	2	2	2	2	2	2	2
SAL_FA4405AA	142504	PHE	SRR3322271;ILLUMINA;Paired;;SRX1674781;222322212;98	SAL_FA4405AA	Human	Human	Human; Homo sapiens	2015	8			Europe	United Kingdom							Typhimurium	I			Public Health England			PRJNA248792	SRP042645	SAMN04600597	SRS1371598	2016-04-02	2016-04-02	1577	1577	1577	1577	1577	2	2	2	2	2	2	2	2	2
SAL_FA4415AA	190779	PHE	SRR3322226;ILLUMINA;Paired;;SRX1674737;316280300;98	SAL_FA4415AA	Human	Human	Human; Homo sapiens	2015	11			Europe	United Kingdom							Typhimurium	I			Public Health England			PRJNA248792	SRP042645	SAMN04600587	SRS1371539	2016-04-02	2016-04-02	1567	1471	1471	1471	1471	269	269	2	2	2	2	2	2	2
SAL_FA4450AA	153180	PHE	SRR3322148;ILLUMINA;Paired;;SRX1674661;350194572;98	SAL_FA4450AA	Human	Human	Human; Homo sapiens	2015	8			Europe	United Kingdom							Typhimurium	I			Public Health England			PRJNA248792	SRP042645	SAMN04600547	SRS1371642	2016-04-02	2016-04-02	1535	1535	1535	1535	1535	269	269	2	2	2	2	2	2	2
SAL_FA4488AA	173718	PHE	SRR3322108;ILLUMINA;Paired;;SRX1674622;467462940;98	SAL_FA4488AA	Human	Human	Human; Homo sapiens	2015	9			Europe	United Kingdom							Typhimurium	I			Public Health England			PRJNA248792	SRP042645	SAMN04600428	SRS1371442	2016-04-02	2016-04-02	1499	1499	1499	1499	1499	269	269	2	2	2	2	2	2	2
SAL_FA4519AA	192872	PHE	SRR3322075;ILLUMINA;Paired;;SRX1674585;223367480;98	SAL_FA4519AA	Human	Human	Human; Homo sapiens	2015	11			Europe	United Kingdom							Typhimurium	I			Public Health England			PRJNA248792	SRP042645	SAMN04600396	SRS1371406	2016-04-02	2016-04-02	1471	1471	1471	1471	1471	269	269	2	2	2	2	2	2	2
SAL_FA4620AA	194221	PHE	SRR3321854;ILLUMINA;Paired;;SRX1674438;375706128;98	SAL_FA4620AA	Human	Human	Human; Homo sapiens	2015	12			Europe	United Kingdom							Typhimurium	I			Public Health England			PRJNA248792	SRP042645	SAMN04600253	SRS1371285	2016-04-02	2016-04-02	1375	1375	1375	1375	1375	2	2	2	2	2	2	2	2	2
SAL_FA5913AA	IEH-NGS-SAL-04100	PHE	SRR3467026;ILLUMINA;Paired;500;SRX1736835;219825592;266	SAL_FA5913AA	Environment	Soil/Dust	Environmental	2015	10			North America	United States	Washington						Typhimurium (Predicted)				Food and Drug Administration - Center for Food Safety and Applied Nutrition (US)			PRJNA186035	SRP018785	SAMN04572743	SRS1417554	2016-04-29	2015-01-01	279	271	271	271	269	269	269	2	2	2	2	2	2	2
SAL_FA5925AA	CFSAN048164	PHE	SRR3467013;ILLUMINA;Paired;500;SRX1736822;386789004;266	SAL_FA5925AA	Environment	Soil/Dust	Environmental	2015	10			North America	United States	Washington						Typhimurium (Predicted)				Food and Drug Administration - Center for Food Safety and Applied Nutrition (US)			PRJNA186035	SRP018785	SAMN04572731	SRS1417541	2016-04-29	2015-01-01	271	271	271	271	269	269	269	2	2	2	2	2	2	2
SAL_FA5927AA	CFSAN048162	PHE	SRR3467011;ILLUMINA;Paired;500;SRX1736820;90775300;275	SAL_FA5927AA	Environment	Soil/Dust	Environmental	2015	10			North America	United States	Washington						Typhimurium (Predicted)				Food and Drug Administration - Center for Food Safety and Applied Nutrition (US)			PRJNA186035	SRP018785	SAMN04572729	SRS1417539	2016-04-29	2015-01-01	269	269	269	269	269	269	269	2	2	2	2	2	2	2
SAL_FA6267AA	6	PHE	traces-0vdiiky;ILLUMINA;Paired;;NA;153146160;72	SAL_FA6267AA				2000												Typhimurium (Predicted)				Mohammed							2016-05-09	2016-11-07	17821	17821	17821	17821	17821	269	269	2	2	2	2	2	2	2
SAL_FA6279AA	14	PHE	traces-0rBkfln;ILLUMINA;Paired;;NA;310577472;72	SAL_FA6279AA				2000												Typhimurium (Predicted)				Mohammed							2016-05-09	2016-11-07	17850	17850	17850	17850	17850	17850	2	2	2	2	2	2	2	2
SAL_FA6345AA	CFSAN045622	PHE	SRR3490064;ILLUMINA;Paired;500;SRX1748632;193097132;278	SRR3715495;ILLUMINA;Paired;500;SRX1874878;;	SAL_FA6345AA	Livestock	Bovine	Beef Patty	2015	4			North America	United States	Washington						Typhimurium (Predicted)				Food and Drug Administration - Center for Food Safety and Applied Nutrition (US)			PRJNA186035	SRP018785	SAMN04451080	SRS1426421	2016-05-10	2015-01-01	4648	4648	271	271	269	269	269	2	2	2	2	2	2	2
SAL_FA6371AA	MDH-2014-00755	PHE	SRR3490035;ILLUMINA;Paired;500;SRX1748603;150712484;247	SAL_FA6371AA	Wild animal	Avian	Porcine Liver	2012	1			North America	United States	Minnesota						Typhimurium	I			Food and Drug Administration - Center for Food Safety and Applied Nutrition (US)			PRJNA215333	SRP032981	SAMN02699921	SRS1426392	2016-05-10	2015-01-01	39584	39584	39584	6	2	2	2	2	2	2	2	2	2	2
SAL_FA6464AA	M16-2000	PHE	traces-0fEcWgz;ILLUMINA;Paired;;NA;108318080;208	SAL_FA6464AA				2000												Typhimurium (Predicted)				Mohammed	DT120						2016-05-11	2016-11-09	39693	39693	39693	39693	39693	2	2	2	2	2	2	2	2	2
SAL_FA6471AA	S12	PHE	traces-0dgfmVP;ILLUMINA;Paired;;NA;580626512;214	SAL_FA6471AA				2000												Typhimurium (Predicted)				Mohammed							2016-05-11	2016-11-09	39711	39711	39711	39711	6912	2	2	2	2	2	2	2	2	2
SAL_FA6474AA	MS120840	PHE	traces-0psYyDm;ILLUMINA;Paired;;NA;303534462;209	SAL_FA6474AA				2000												Typhimurium (Predicted)				Mohammed	DT7a						2016-05-11	2016-11-09	20184	20184	20184	20184	20184	2	2	2	2	2	2	2	2	2
SAL_FA7114AA	ADRDL15-18344	PHE	SRR3571352;ILLUMINA;Paired;500;SRX1792753;318625196;226	SAL_FA7114AA	Livestock	Bovine	Bovine Feces (Bos taurus)	2015	8			North America	United States	Minnesota						Typhimurium (Predicted)				Food and Drug Administration - Center for Food Safety and Applied Nutrition (US)			PRJNA280335	SRP059853	SAMN04993538	SRS1462462	2016-05-23	2015-01-01	40233	40233	271	271	269	269	269	2	2	2	2	2	2	2
SAL_FA7120AA	ADRDL15-17560	PHE	SRR3571346;ILLUMINA;Paired;500;SRX1792744;480210224;226	SAL_FA7120AA	Livestock	Bovine	Bovine feces (Bos taurus)	2015	7			North America	United States	Minnesota						Typhimurium (Predicted)				Food and Drug Administration - Center for Food Safety and Applied Nutrition (US)			PRJNA280335	SRP059853	SAMN04993530	SRS1462453	2016-05-23	2015-01-01	40230	40230	271	271	269	269	269	2	2	2	2	2	2	2
SAL_FA7132AA	E2015001324	PHE	SRR3571310;ILLUMINA;Paired;500;SRX1792727;148008360;246	SAL_FA7132AA	ND	Swine	Porcine Intestine	2014	9			North America	United States	Minnesota						Typhimurium				Food and Drug Administration - Center for Food Safety and Applied Nutrition (US)			PRJNA215333	SRP032981	SAMN04943075	SRS1462439	2016-05-23	2015-01-01	40164	40164	40164	271	269	269	269	2	2	2	2	2	2	2
SAL_FA7298AA	FSIS1606573	PHE	SRR3586912;ILLUMINA;Paired;300;SRX1799847;395673168;132	SAL_FA7298AA	Livestock	Bovine	Animal-Cattle-Dairy Cow	2016				North America	United States	Utah						Typhimurium	I			Department of Agriculture - Food Safety and Inspection Service (US)			PRJNA292666	SRP062916	SAMN05176304	SRS1467109	2016-05-25	2016-05-25	41630	2862	2862	271	269	269	269	2	2	2	2	2	2	2
SAL_FA7593AA	L00427_10	PHE	traces-0pWWBEF;ILLUMINA;Paired;;NA;730999500;125	SAL_FA7593AA				2010				Europe	United Kingdom							Typhimurium				Dr Liljana Petrovska							2016-06-02	2016-12-05	40477	40477	2621	302	2	2	2	2	2	2	2	2	2	2
SAL_FA9694AA	CFSAN042046	PHE	SRR3057177;ILLUMINA;Paired;500;SRX1503031;270748330;233	SAL_FA9694AA	Poultry	Avian	Poultry	2015	3			North America	United States	Indiana						Typhimurium (Predicted)				Food and Drug Administration - Center for Food Safety and Applied Nutrition (US)			PRJNA186035	SRP018785	SAMN04277197	SRS1224086	2016-06-30	2015-01-01	45392	45392	45392	6	2	2	2	2	2	2	2	2	2	2
SAL_GA1642AA	BCW_4365	PHE	SRR1840738;ILLUMINA;Paired;;SRX902772;630136668;98	SAL_GA1642AA	Human	Human	Homo sapiens	2007				North America	United States	Ohio						Typhimurium	I			University of California Davis - 100K Genome Project			PRJNA203445	SRP022914	SAMN02368963	SRS865286	2016-06-30	2016-03-05	44058	44058	44058	44058	44058	44058	3610	2	2	2	2	2	2	2
SAL_GA2021AA	BCW_4390	PHE	SRR1816146;ILLUMINA;Paired;;SRX888518;351023310;99	SAL_GA2021AA	ND	ND	culture													Typhimurium (Predicted)				University of California Davis - 100K Genome Project			PRJNA203445	SRP022914	SAMN03358073	SRS854159	2016-06-30	2016-02-24	43672	43672	43672	43672	43672	43672	3610	2	2	2	2	2	2	2
SAL_GA2263AA	BCW_5892	PHE	SRR1814922;ILLUMINA;Paired;;SRX887294;518953842;99	SAL_GA2263AA	ND	ND	culture													Typhimurium (Predicted)				University of California Davis - 100K Genome Project			PRJNA203445	SRP022914	SAMN03359735	SRS855354	2016-06-30	2016-02-24	43485	43485	43485	43485	43485	2	2	2	2	2	2	2	2	2
SAL_GA2287AA	BCW_5867	PHE	SRR1814898;ILLUMINA;Paired;;SRX887270;287863488;99	SAL_GA2287AA	ND	ND	culture													Typhimurium (Predicted)				University of California Davis - 100K Genome Project			PRJNA203445	SRP022914	SAMN03359711	SRS855381	2016-06-30	2016-02-24	43463	43463	9928	9928	9928	2	2	2	2	2	2	2	2	2
SAL_GA2295AA	BCW_5859	PHE	SRR1814890;ILLUMINA;Paired;;SRX887262;312365394;99	SAL_GA2295AA	ND	ND	culture													Typhimurium (Predicted)				University of California Davis - 100K Genome Project			PRJNA203445	SRP022914	SAMN03359703	SRS855389	2016-06-30	2016-02-24	43455	43455	9928	9928	9928	2	2	2	2	2	2	2	2	2
SAL_GA2304AA	BCW_5850	PHE	SRR1814881;ILLUMINA;Paired;;SRX887253;397993860;99	SAL_GA2304AA	ND	ND	culture													Typhimurium (Predicted)				University of California Davis - 100K Genome Project			PRJNA203445	SRP022914	SAMN03359694	SRS855398	2016-06-30	2016-02-24	43444	43444	43444	43444	43444	43444	2	2	2	2	2	2	2	2
SAL_GA2305AA	BCW_5849	PHE	SRR1814880;ILLUMINA;Paired;;SRX887252;319356180;99	SAL_GA2305AA	ND	ND	culture													Typhimurium (Predicted)				University of California Davis - 100K Genome Project			PRJNA203445	SRP022914	SAMN03359693	SRS855399	2016-06-30	2016-02-24	43445	43445	43445	43445	43445	2	2	2	2	2	2	2	2	2
SAL_GA2326AA	BCW_5828	PHE	SRR1814859;ILLUMINA;Paired;;SRX887231;432265680;99	SAL_GA2326AA	ND	ND	culture													Typhimurium (Predicted)				University of California Davis - 100K Genome Project			PRJNA203445	SRP022914	SAMN03359672	SRS855420	2016-06-30	2016-02-24	43424	43424	43424	43424	12652	269	269	2	2	2	2	2	2	2
SAL_GA2975AA	Sente053	PHE	SRR1604875;ILLUMINA;Paired;600;SRX726497;627274346;157	SAL_GA2975AA	ND	ND	Retail Meat	2006				Europe	United Kingdom							Agona				Food and Environment Research Agency (US)		Collection year is ambiguous - 2006/2008	PRJNA259925	SRP048657	SAMN03097225	SRS717310	2016-07-01	2014-10-17	43002	43002	43002	43002	20732	2	2	2	2	2	2	2	2	2
SAL_GA3081AA	BCW_4352	PHE	SRR1133231;ILLUMINA;Paired;250;SRX441948;492208070;97	SAL_GA3081AA	Human	Human	Homo sapiens	2007				North America	United States	Massachusetts						Typhimurium	I			University of California Davis - 100K Genome Project			PRJNA203445	SRP022914	SAMN02368952	SRS538857	2016-07-01	2015-07-22	42928	42928	42928	42928	42928	42928	3610	2	2	2	2	2	2	2
SAL_GA3084AA	BCW_4346	PHE	SRR1133234;ILLUMINA;Paired;250;SRX441945;537791040;96	SAL_GA3084AA	Human	Human	Homo sapiens	2010				North America	United States	Wisconsin						Typhimurium Var. 5-	I			University of California Davis - 100K Genome Project			PRJNA203445	SRP022914	SAMN02368947	SRS538854	2016-07-01	2015-07-22	42925	42925	42925	42925	42925	42925	3610	2	2	2	2	2	2	2
SAL_GA4686AA	Z256S	PHE	traces-0RYZAyN;ILLUMINA;Paired;;NA;1227472200;150	SAL_GA4686AA				2014												Typhimurium (Predicted)				38862607@qq.com							2016-07-18	2017-01-20	44874	44874	44874	44874	44874	9763	2	2	2	2	2	2	2	2
SAL_GA6315AA	FSIS1607117	PHE	SRR3995468;ILLUMINA;Paired;300;SRX1996533;391771184;133	SAL_GA6315AA	Livestock	Swine	Product-Raw-Intact-Pork	2016				North America	United States	Nebraska						I 4	[5]	12:I:-	I			Department of Agriculture - Food Safety and Inspection Service (US)			PRJNA242847	SRP040648	SAMN05505559	SRS1597978	2016-08-03	2016-08-02	47943	47943	47943	47943	2	2	2	2	2	2	2	2	2	2
SAL_GA6646AA	PNUSAS003046	PHE	SRR3999885;ILLUMINA;Paired;;SRX2000259;414315468;207	SAL_GA6646AA	ND	ND	Age: 60-69; Stool	2016	6			North America	United States							Typhimurium				Center for Diease Control and Prevention - Enteric Diseases Laboratory Branch (US)			PRJNA230403	SRP040281	SAMN05449213	SRS1600957	2016-08-05	2016-08-04	47998	47998	271	271	269	269	269	2	2	2	2	2	2	2
SAL_GA7487AA	PNUSAS003207	PHE	SRR4040100;ILLUMINA;Paired;;SRX2031213;394488000;200	SAL_GA7487AA	ND	ND						North America	United States							Typhimurium (Predicted)				Center for Diease Control and Prevention - Enteric Diseases Laboratory Branch (US)			PRJNA230403	SRP040281	SAMN05557857	SRS1625267	2016-08-19	2016-08-18	48710	47998	271	271	269	269	269	2	2	2	2	2	2	2
SAL_GA7561AA	PNUSAS003228	PHE	SRR4032967;ILLUMINA;Paired;;SRX2024299;451164266;217	SAL_GA7561AA	ND	ND	Stool; Age: 20-29	2016	7			North America	United States							Typhimurium				Center for Diease Control and Prevention - Enteric Diseases Laboratory Branch (US)			PRJNA230403	SRP040281	SAMN05557861	SRS1618729	2016-08-19	2016-08-15	47998	47998	271	271	269	269	269	2	2	2	2	2	2	2
SAL_GA7792AA	2014AM-3176	PHE	SRR4044670;ILLUMINA;Paired;;SRX2035534;886235084;241	SAL_GA7792AA	ND	ND						North America	United States							Typhimurium (Predicted)				Center for Diease Control and Prevention - Enteric Diseases Laboratory Branch (US)			PRJNA287785	SRP082403	SAMN05596820	SRS1629431	2016-08-20	2016-08-19	49099	49099	36034	271	269	269	269	2	2	2	2	2	2	2
SAL_GA7805AA	2014AM-2943	PHE	SRR4044657;ILLUMINA;Paired;;SRX2035521;960588886;241	SAL_GA7805AA	ND	ND						North America	United States							Typhimurium (Predicted)				Center for Diease Control and Prevention - Enteric Diseases Laboratory Branch (US)			PRJNA287785	SRP082403	SAMN05596679	SRS1629418	2016-08-20	2016-08-19	49054	49054	2862	271	269	269	269	2	2	2	2	2	2	2
SAL_GA7825AA	2014AM-0481	PHE	SRR4044637;ILLUMINA;Paired;;SRX2035501;823228800;240	SAL_GA7825AA								North America	United States							Typhimurium (Predicted)				Center for Diease Control and Prevention - Enteric Diseases Laboratory Branch (US)			PRJNA287785	SRP082403	SAMN05596705	SRS1629398	2016-08-20	2016-08-19	49026	49026	49026	49026	3610	3610	3610	2	2	2	2	2	2	2
SAL_GA7941AA	2014AM-0655	PHE	SRR4044436;ILLUMINA;Paired;;SRX2035311;966477336;242	SAL_GA7941AA								North America	United States							Typhimurium (Predicted)				Center for Diease Control and Prevention - Enteric Diseases Laboratory Branch (US)			PRJNA287785	SRP082403	SAMN05596256	SRS1629239	2016-08-20	2016-08-19	48900	48900	48900	48900	48900	3610	3610	2	2	2	2	2	2	2
SAL_GA7945AA	2014AM-2330	PHE	SRR4044431;ILLUMINA;Paired;;SRX2035307;696517140;242	SAL_GA7945AA								North America	United States							Typhimurium (Predicted)				Center for Diease Control and Prevention - Enteric Diseases Laboratory Branch (US)			PRJNA287785	SRP082403	SAMN05596250	SRS1629235	2016-08-20	2016-08-19	48904	48904	48904	6	2	2	2	2	2	2	2	2	2	2
SAL_GA7948AA	2014AM-2954	PHE	SRR4044428;ILLUMINA;Paired;;SRX2035304;691857152;233	SAL_GA7948AA								North America	United States							Typhimurium (Predicted)				Center for Diease Control and Prevention - Enteric Diseases Laboratory Branch (US)			PRJNA287785	SRP082403	SAMN05596249	SRS1629232	2016-08-20	2016-08-19	6225	6225	271	271	269	269	269	2	2	2	2	2	2	2
SAL_GA7974AA	2014AM-0492	PHE	SRR4044389;ILLUMINA;Paired;;SRX2035265;771073992;234	SAL_GA7974AA								North America	United States							Typhimurium (Predicted)				Center for Diease Control and Prevention - Enteric Diseases Laboratory Branch (US)			PRJNA287785	SRP082403	SAMN05596123	SRS1629195	2016-08-20	2016-08-19	48931	48931	271	271	269	269	269	2	2	2	2	2	2	2
SAL_GA7975AA	2014AM-0217	PHE	SRR4044387;ILLUMINA;Paired;;SRX2035264;899989872;239	SAL_GA7975AA								North America	United States							Typhimurium (Predicted)				Center for Diease Control and Prevention - Enteric Diseases Laboratory Branch (US)			PRJNA287785	SRP082403	SAMN05596124	SRS1629193	2016-08-20	2016-08-19	48932	48932	48932	48932	48932	3610	3610	2	2	2	2	2	2	2
SAL_GA7979AA	2014AM-2019	PHE	SRR4044381;ILLUMINA;Paired;;SRX2035260;797330628;243	SAL_GA7979AA								North America	United States							Typhimurium (Predicted)				Center for Diease Control and Prevention - Enteric Diseases Laboratory Branch (US)			PRJNA287785	SRP082403	SAMN05596087	SRS1629194	2016-08-20	2016-08-19	48936	48936	48936	48936	48936	48936	3610	2	2	2	2	2	2	2
SAL_GA7980AA	2014AM-2018	PHE	SRR4044380;ILLUMINA;Paired;;SRX2035259;730977100;241	SAL_GA7980AA								North America	United States							Typhimurium (Predicted)				Center for Diease Control and Prevention - Enteric Diseases Laboratory Branch (US)			PRJNA287785	SRP082403	SAMN05596088	SRS1629189	2016-08-20	2016-08-19	48936	48936	48936	48936	48936	48936	3610	2	2	2	2	2	2	2
SAL_GA8029AA	FSIS1607408	PHE	SRR4050196;ILLUMINA;Paired;300;SRX2039818;354915000;135	SAL_GA8029AA	Livestock	Bovine	Animal-Cattle-Dairy Cow	2016				North America	United States	California						Typhimurium	I			Department of Agriculture - Food Safety and Inspection Service (US)			PRJNA292666	SRP062916	SAMN05606850	SRS1633248	2016-08-24	2016-08-23	49198	49198	271	271	269	269	269	2	2	2	2	2	2	2
SAL_GA8165AA	PP_BR076	PHE	SRR4046399;ILLUMINA;Paired;500;SRX2037293;457036826;229	SAL_GA8165AA	Human	Human	Homo sapiens; Stool	2010				South America	Brazil							Typhimurium				Food and Drug Administration - Center for Food Safety and Applied Nutrition (US)			PRJNA336192	SRP082492	SAMN05505493	SRS1631052	2016-08-24	2015-01-01	49267	49267	49267	49267	49267	49267	269	2	2	2	2	2	2	2
SAL_GA8174AA	PP_BR027	PHE	SRR4046386;ILLUMINA;Paired;500;SRX2037284;453612768;236	SAL_GA8174AA	Human	Human	Homo sapiens; Wound	2012				South America	Brazil							Typhimurium				Food and Drug Administration - Center for Food Safety and Applied Nutrition (US)			PRJNA336192	SRP082492	SAMN05505502	SRS1631043	2016-08-24	2015-01-01	49276	49276	49276	49276	49276	49276	269	2	2	2	2	2	2	2
SAL_GA8562AA	PNUSAS003367	PHE	SRR4100141;ILLUMINA;Paired;;SRX2067958;355766676;246	SAL_GA8562AA								North America	United States							Typhimurium (Predicted)				Center for Diease Control and Prevention - Enteric Diseases Laboratory Branch (US)			PRJNA230403	SRP040281	SAMN05525302	SRS1658937	2016-08-31	2016-08-30	49543	49543	49543	49543	49543	49543	3610	2	2	2	2	2	2	2
SAL_GA8729AA	FSIS1607510	PHE	SRR4125012;ILLUMINA;Paired;300;SRX2107007;505840518;131	SAL_GA8729AA	Livestock	Swine	Product-Raw-Intact-Pork	2016				North America	United States	Iowa						I 4	[5]	12:I:-	I			Department of Agriculture - Food Safety and Inspection Service (US)			PRJNA242847	SRP040648	SAMN05726935	SRS1666285	2016-09-03	2016-09-02	49642	49642	49642	49642	49642	2	2	2	2	2	2	2	2	2
SAL_GA8931AA	PNUSAS003330	PHE	SRR4190214;ILLUMINA;Paired;;SRX2145602;534291008;164	SAL_GA8931AA								North America	United States							Typhimurium (Predicted)				Center for Diease Control and Prevention - Enteric Diseases Laboratory Branch (US)			PRJNA230403	SRP040281	SAMN05717346	SRS1677061	2016-09-08	2016-09-07	49749	49749	271	271	269	269	269	2	2	2	2	2	2	2
SAL_GA8932AA	PNUSAS003329	PHE	SRR4190213;ILLUMINA;Paired;;SRX2145601;626287820;170	SAL_GA8932AA								North America	United States							Typhimurium (Predicted)				Center for Diease Control and Prevention - Enteric Diseases Laboratory Branch (US)			PRJNA230403	SRP040281	SAMN05717345	SRS1677059	2016-09-08	2016-09-07	49762	49749	271	271	269	269	269	2	2	2	2	2	2	2
SAL_GA8933AA	PNUSAS003328	PHE	SRR4190212;ILLUMINA;Paired;;SRX2145600;432634512;166	SAL_GA8933AA								North America	United States							Typhimurium (Predicted)				Center for Diease Control and Prevention - Enteric Diseases Laboratory Branch (US)			PRJNA230403	SRP040281	SAMN05717344	SRS1677058	2016-09-08	2016-09-07	49749	49749	271	271	269	269	269	2	2	2	2	2	2	2
SAL_GA8934AA	PNUSAS003327	PHE	SRR4190211;ILLUMINA;Paired;;SRX2145599;272122760;182	SAL_GA8934AA								North America	United States							Typhimurium (Predicted)				Center for Diease Control and Prevention - Enteric Diseases Laboratory Branch (US)			PRJNA230403	SRP040281	SAMN05717343	SRS1677057	2016-09-08	2016-09-07	49761	49761	271	271	269	269	269	2	2	2	2	2	2	2
SAL_GA8935AA	PNUSAS003326	PHE	SRR4190210;ILLUMINA;Paired;;SRX2145598;503758512;184	SAL_GA8935AA								North America	United States							Typhimurium (Predicted)				Center for Diease Control and Prevention - Enteric Diseases Laboratory Branch (US)			PRJNA230403	SRP040281	SAMN05717342	SRS1677056	2016-09-08	2016-09-07	49749	49749	271	271	269	269	269	2	2	2	2	2	2	2
SAL_GA8936AA	PNUSAS003325	PHE	SRR4190209;ILLUMINA;Paired;;SRX2145597;566005344;184	SAL_GA8936AA								North America	United States							Typhimurium (Predicted)				Center for Diease Control and Prevention - Enteric Diseases Laboratory Branch (US)			PRJNA230403	SRP040281	SAMN05717341	SRS1677054	2016-09-08	2016-09-07	49773	49773	271	271	269	269	269	2	2	2	2	2	2	2
SAL_GA8937AA	PNUSAS003324	PHE	SRR4190208;ILLUMINA;Paired;;SRX2145596;270455712;184	SAL_GA8937AA								North America	United States							Typhimurium (Predicted)				Center for Diease Control and Prevention - Enteric Diseases Laboratory Branch (US)			PRJNA230403	SRP040281	SAMN05717340	SRS1677055	2016-09-08	2016-09-07	49809	49749	271	271	269	269	269	2	2	2	2	2	2	2
SAL_GA8938AA	PNUSAS003322	PHE	SRR4190207;ILLUMINA;Paired;;SRX2145595;480494354;179	SAL_GA8938AA								North America	United States							Typhimurium (Predicted)				Center for Diease Control and Prevention - Enteric Diseases Laboratory Branch (US)			PRJNA230403	SRP040281	SAMN05717339	SRS1677053	2016-09-08	2016-09-07	49749	49749	271	271	269	269	269	2	2	2	2	2	2	2
SAL_GA8939AA	PNUSAS003321	PHE	SRR4190206;ILLUMINA;Paired;;SRX2145594;774984944;178	SAL_GA8939AA								North America	United States							Typhimurium (Predicted)				Center for Diease Control and Prevention - Enteric Diseases Laboratory Branch (US)			PRJNA230403	SRP040281	SAMN05717338	SRS1677052	2016-09-08	2016-09-07	49763	49763	271	271	269	269	269	2	2	2	2	2	2	2
SAL_GA8940AA	PNUSAS003320	PHE	SRR4190205;ILLUMINA;Paired;;SRX2145593;424819468;197	SAL_GA8940AA								North America	United States							Typhimurium (Predicted)				Center for Diease Control and Prevention - Enteric Diseases Laboratory Branch (US)			PRJNA230403	SRP040281	SAMN05717337	SRS1677051	2016-09-08	2016-09-07	49749	49749	271	271	269	269	269	2	2	2	2	2	2	2
SAL_GA8941AA	PNUSAS003319	PHE	SRR4190204;ILLUMINA;Paired;;SRX2145592;316470648;194	SAL_GA8941AA								North America	United States							Typhimurium (Predicted)				Center for Diease Control and Prevention - Enteric Diseases Laboratory Branch (US)			PRJNA230403	SRP040281	SAMN05717336	SRS1677050	2016-09-08	2016-09-07	49749	49749	271	271	269	269	269	2	2	2	2	2	2	2
SAL_GA8942AA	PNUSAS003318	PHE	SRR4190203;ILLUMINA;Paired;;SRX2145591;380096992;176	SAL_GA8942AA								North America	United States							Typhimurium (Predicted)				Center for Diease Control and Prevention - Enteric Diseases Laboratory Branch (US)			PRJNA230403	SRP040281	SAMN05717335	SRS1677049	2016-09-08	2016-09-07	49749	49749	271	271	269	269	269	2	2	2	2	2	2	2
SAL_GA8943AA	PNUSAS003317	PHE	SRR4190202;ILLUMINA;Paired;;SRX2145590;458898486;183	SAL_GA8943AA								North America	United States							Typhimurium (Predicted)				Center for Diease Control and Prevention - Enteric Diseases Laboratory Branch (US)			PRJNA230403	SRP040281	SAMN05717334	SRS1677048	2016-09-08	2016-09-07	49749	49749	271	271	269	269	269	2	2	2	2	2	2	2
SAL_GA8944AA	PNUSAS003316	PHE	SRR4190201;ILLUMINA;Paired;;SRX2145589;503404216;193	SAL_GA8944AA								North America	United States							Typhimurium (Predicted)				Center for Diease Control and Prevention - Enteric Diseases Laboratory Branch (US)			PRJNA230403	SRP040281	SAMN05717333	SRS1677047	2016-09-08	2016-09-07	49749	49749	271	271	269	269	269	2	2	2	2	2	2	2
SAL_GA8945AA	PNUSAS003315	PHE	SRR4190200;ILLUMINA;Paired;;SRX2145588;536441956;193	SAL_GA8945AA								North America	United States							Typhimurium (Predicted)				Center for Diease Control and Prevention - Enteric Diseases Laboratory Branch (US)			PRJNA230403	SRP040281	SAMN05717332	SRS1677046	2016-09-08	2016-09-07	49808	49749	271	271	269	269	269	2	2	2	2	2	2	2
SAL_GA9331AA	SH149	PHE	traces-0tnJgVD;ILLUMINA;Paired;;NA;600000000;150	SAL_GA9331AA				2013												Typhimurium (Predicted)				China							2016-09-19	2017-03-24	50133	50133	50133	50133	50133	50133	2	2	2	2	2	2	2	2
SAL_GA9332AA	SH175	PHE	traces-0ZyIcKe;ILLUMINA;Paired;;NA;600000000;150	SAL_GA9332AA				2013												Typhimurium (Predicted)				China							2016-09-19	2017-03-24	50133	50133	50133	50133	50133	50133	2	2	2	2	2	2	2	2
SAL_HA0425AA	0000-0060-5878	PHE	SRR4294839;ILLUMINA;Paired;;SRX2190292;477968400;182	SAL_HA0425AA	Human	Human	stool; Homo sapiens; Age: 62; female	2016				North America	United States	Massachusetts	Suffolk County	Boston		42.3	-71	Typhimurium (Predicted)				Brigham & Women's Hospital			PRJNA278886	SRP056445	SAMN05806172	SRS1712865	2016-10-09	2016-10-01	50859	50859	271	271	269	269	269	2	2	2	2	2	2	2
SAL_HA0645AA	2014AM-1433	PHE	SRR4420901;ILLUMINA;Paired;;SRX2243225;640383360;240	SAL_HA0645AA	ND	ND						North America	United States							Typhimurium (Predicted)				Center for Diease Control and Prevention - Enteric Diseases Laboratory Branch (US)			PRJNA287785	SRP082403	SAMN05907722	SRS1744234	2016-10-14	2016-10-13	51204	51204	51204	51204	48932	3610	3610	2	2	2	2	2	2	2
SAL_HA0724AA	PNUSAS004493	PHE	SRR4418401;ILLUMINA;Paired;;SRX2240821;434037144;241	SAL_HA0724AA	ND	ND						North America	United States	Wyoming						Typhimurium (Predicted)				Center for Diease Control and Prevention - Enteric Diseases Laboratory Branch (US)			PRJNA230403	SRP040281	SAMN05879182	SRS1742417	2016-10-14	2016-10-12	51122	51122	28417	271	269	269	269	2	2	2	2	2	2	2
SAL_HA0817AA	CFSAN048197	PHE	SRR4417874;ILLUMINA;Paired;500;SRX2240229;287467416;282	SAL_HA0817AA	Environment	Soil/Dust	Environmental	2015	10			North America	United States	Washington						Typhimurium (Predicted)				Food and Drug Administration - Center for Food Safety and Applied Nutrition (US)			PRJNA186035	SRP018785	SAMN04572775	SRS1741918	2016-10-14	2015-01-01	51046	51046	271	271	269	269	269	2	2	2	2	2	2	2
SAL_HA1073AA	ARIM-STM444-06	PHE	SRR4427816;ILLUMINA;Paired;500;SRX2249377;503315472;228	SAL_HA1073AA	Livestock	Swine	node; Sus scrofa	2006	2			South America	Argentina	Autonomous City of Buenos Aires		Buenos Aires				Typhimurium	I			Food and Drug Administration - Center for Food Safety and Applied Nutrition (US)			PRJNA271293	SRP057694	SAMN03743830	SRS1749359	2016-10-19	2015-01-01	54751	54751	54751	54751	54751	54751	269	2	2	2	2	2	2	2
SAL_HA2764AA	CFSAN048262	PHE	SRR5000265;ILLUMINA;Paired;500;SRX2332723;313139736;267	SAL_HA2764AA	Environment	Soil/Dust	Environmental	2015	10			North America	United States	Washington						Typhimurium (Predicted)				Food and Drug Administration - Center for Food Safety and Applied Nutrition (US)			PRJNA186035	SRP018785	SAMN04572844	SRS1786973	2016-11-08	2015-01-01	52467	271	271	271	269	269	269	2	2	2	2	2	2	2
SAL_HA2895AA	PNUSAS004715	PHE	SRR4896299;ILLUMINA;Paired;;SRX2325611;438875250;165	SAL_HA2895AA								North America	United States							Typhimurium (Predicted)				Center for Diease Control and Prevention - Enteric Diseases Laboratory Branch (US)			PRJNA230403	SRP040281	SAMN05941840	SRS1781447	2016-11-08	2016-11-03	33954	33954	271	271	269	269	269	2	2	2	2	2	2	2
SAL_HA2896AA	PNUSAS004716	PHE	SRR4896298;ILLUMINA;Paired;;SRX2325610;320133732;173	SAL_HA2896AA								North America	United States							Typhimurium (Predicted)				Center for Diease Control and Prevention - Enteric Diseases Laboratory Branch (US)			PRJNA230403	SRP040281	SAMN05941841	SRS1781446	2016-11-08	2016-11-03	52028	52028	52028	271	269	269	269	2	2	2	2	2	2	2
SAL_HA2897AA	PNUSAS004714	PHE	SRR4896297;ILLUMINA;Paired;;SRX2325609;412129376;164	SAL_HA2897AA								North America	United States							Typhimurium (Predicted)				Center for Diease Control and Prevention - Enteric Diseases Laboratory Branch (US)			PRJNA230403	SRP040281	SAMN05941839	SRS1781445	2016-11-08	2016-11-03	52044	52044	271	271	269	269	269	2	2	2	2	2	2	2
SAL_HA2898AA	PNUSAS004713	PHE	SRR4896296;ILLUMINA;Paired;;SRX2325608;376742080;176	SAL_HA2898AA								North America	United States							Typhimurium (Predicted)				Center for Diease Control and Prevention - Enteric Diseases Laboratory Branch (US)			PRJNA230403	SRP040281	SAMN05941838	SRS1781444	2016-11-08	2016-11-03	52044	52044	271	271	269	269	269	2	2	2	2	2	2	2
SAL_HA3086AA	PNUSAS004720	PHE	SRR4841704;ILLUMINA;Paired;;SRX2321687;355991152;187	SAL_HA3086AA								North America	United States							Typhimurium (Predicted)				Center for Diease Control and Prevention - Enteric Diseases Laboratory Branch (US)			PRJNA230403	SRP040281	SAMN05941845	SRS1777933	2016-11-08	2016-11-02	52082	52082	52082	52082	269	269	269	2	2	2	2	2	2	2
SAL_HA3087AA	PNUSAS003323	PHE	SRR4841703;ILLUMINA;Paired;;SRX2321686;537306256;188	SAL_HA3087AA								North America	United States							Typhimurium (Predicted)				Center for Diease Control and Prevention - Enteric Diseases Laboratory Branch (US)			PRJNA230403	SRP040281	SAMN05941836	SRS1777931	2016-11-08	2016-11-02	49749	49749	271	271	269	269	269	2	2	2	2	2	2	2
SAL_HA3090AA	PNUSAS004721	PHE	SRR4841700;ILLUMINA;Paired;;SRX2321683;385863456;176	SAL_HA3090AA								North America	United States							Typhimurium (Predicted)				Center for Diease Control and Prevention - Enteric Diseases Laboratory Branch (US)			PRJNA230403	SRP040281	SAMN05941846	SRS1777928	2016-11-08	2016-11-02	52069	52069	271	271	269	269	269	2	2	2	2	2	2	2
SAL_HA3091AA	PNUSAS004723	PHE	SRR4841699;ILLUMINA;Paired;;SRX2321682;409564152;171	SAL_HA3091AA								North America	United States							Typhimurium (Predicted)				Center for Diease Control and Prevention - Enteric Diseases Laboratory Branch (US)			PRJNA230403	SRP040281	SAMN05941848	SRS1777929	2016-11-08	2016-11-02	52069	52069	271	271	269	269	269	2	2	2	2	2	2	2
SAL_HA3216AA	PNUSAS004722	PHE	SRR5004552;ILLUMINA;Paired;;SRX2336385;294214526;173	SAL_HA3216AA								North America	United States							Typhimurium (Predicted)				Center for Diease Control and Prevention - Enteric Diseases Laboratory Branch (US)			PRJNA230403	SRP040281	SAMN05941847	SRS1789867	2016-11-09	2016-11-08	52069	52069	271	271	269	269	269	2	2	2	2	2	2	2
SAL_HA3217AA	PNUSAS004728	PHE	SRR5004551;ILLUMINA;Paired;;SRX2336384;471569670;165	SAL_HA3217AA								North America	United States							Typhimurium (Predicted)				Center for Diease Control and Prevention - Enteric Diseases Laboratory Branch (US)			PRJNA230403	SRP040281	SAMN05941851	SRS1789866	2016-11-09	2016-11-08	49749	49749	271	271	269	269	269	2	2	2	2	2	2	2
SAL_HA3218AA	PNUSAS004724	PHE	SRR5004550;ILLUMINA;Paired;;SRX2336383;309607662;169	SAL_HA3218AA								North America	United States							Typhimurium (Predicted)				Center for Diease Control and Prevention - Enteric Diseases Laboratory Branch (US)			PRJNA230403	SRP040281	SAMN05941849	SRS1789865	2016-11-09	2016-11-08	52069	52069	271	271	269	269	269	2	2	2	2	2	2	2
SAL_HA3219AA	PNUSAS004718	PHE	SRR5004549;ILLUMINA;Paired;;SRX2336382;338378334;177	SAL_HA3219AA								North America	United States							Typhimurium (Predicted)				Center for Diease Control and Prevention - Enteric Diseases Laboratory Branch (US)			PRJNA230403	SRP040281	SAMN05941843	SRS1789864	2016-11-09	2016-11-08	52265	52265	271	271	269	269	269	2	2	2	2	2	2	2
SAL_HA3220AA	PNUSAS004719	PHE	SRR5004548;ILLUMINA;Paired;;SRX2336381;825742752;179	SAL_HA3220AA								North America	United States							Typhimurium (Predicted)				Center for Diease Control and Prevention - Enteric Diseases Laboratory Branch (US)			PRJNA230403	SRP040281	SAMN05941844	SRS1789863	2016-11-09	2016-11-08	49749	49749	271	271	269	269	269	2	2	2	2	2	2	2
SAL_HA3222AA	PNUSAS004717	PHE	SRR5004546;ILLUMINA;Paired;;SRX2336379;329153606;173	SAL_HA3222AA								North America	United States							Typhimurium (Predicted)				Center for Diease Control and Prevention - Enteric Diseases Laboratory Branch (US)			PRJNA230403	SRP040281	SAMN05941842	SRS1789861	2016-11-09	2016-11-08	52266	52266	52266	52266	52266	269	269	2	2	2	2	2	2	2
SAL_HA3822AA	PNUSAS005290	PHE	SRR5023363;ILLUMINA;Paired;;SRX2350073;217395388;238	SAL_HA3822AA	ND	ND	Stool; Age: 0-4	2016	9			North America	United States							Typhimurium				Center for Diease Control and Prevention - Enteric Diseases Laboratory Branch (US)			PRJNA230403	SRP040281	SAMN06007359	SRS1800189	2016-11-16	2016-11-15	55161	55161	55161	55161	55161	55161	269	2	2	2	2	2	2	2
SAL_HA4775AA	6783-09-01	PHE	SRR5051386;ILLUMINA;Paired;;SRX2372801;439235676;297	SAL_HA4775AA	Human	Human	Homo sapiens					North America	Canada							Typhimurium	I			National Microbiology Laboratory			PRJNA353625	SRP093623	SAMN06030001	SRS1817553	2016-11-24	2016-11-22	53843	53843	53843	53843	53843	53843	3610	2	2	2	2	2	2	2
SAL_HA4830AA	MS160090	PHE	traces-0eIUGwZ;ILLUMINA;Paired;;NA;339250128;97	SAL_HA4830AA	Human	Human		2016				Europe	Ireland							Typhimurium monophasic	I			NSSLRL	RDNC						2016-11-25	2017-05-30	53393	53393	53393	302	2	2	2	2	2	2	2	2	2	2
SAL_HA4843AA	MS160203	PHE	traces-0dhHrjS;ILLUMINA;Paired;;NA;413925540;98	SAL_HA4843AA	Human	Human		2016				Europe	Ireland							Typhimurium monophasic	I		4	5	12:i:-	NSSLRL	DT193	monophasic					2016-11-25	2017-05-30	53402	53402	53402	5289	2	2	2	2	2	2	2	2	2	2
SAL_HA4857AA	MS160001	PHE	traces-0GvxFnA;ILLUMINA;Paired;;NA;349723606;97	SAL_HA4857AA	Human	Human		2016				Europe	Ireland							Typhimurium	I		1	4	5	12:i:2	NSSLRL	RDNC						2016-11-25	2017-05-30	1567	1471	1471	1471	1471	269	269	2	2	2	2	2	2	2
SAL_HA4870AA	MS160227	PHE	traces-0DtglBm;ILLUMINA;Paired;;NA;540849302;97	SAL_HA4870AA	Human	Human		2016				Europe	Ireland							Typhimurium	I			NSSLRL							2016-11-25	2017-05-30	53434	53434	53434	53434	53434	53434	25390	2	2	2	2	2	2	2
SAL_HA4872AA	MS160239	PHE	traces-0HdyxKU;ILLUMINA;Paired;;NA;610756344;99	SAL_HA4872AA	Human	Human		2016				Europe	Ireland							Typhimurium	I			NSSLRL							2016-11-25	2017-05-30	53434	53434	53434	53434	53434	53434	25390	2	2	2	2	2	2	2
SAL_HA5193AA	6199-11-01	PHE	SRR5055243;ILLUMINA;Paired;;SRX2376057;529988828;298	SAL_HA5193AA	Human	Human	Homo sapiens					North America	Canada							Typhimurium	I			National Microbiology Laboratory			PRJNA353625	SRP093623	SAMN06030148	SRS1819099	2016-11-27	2016-11-24	54067	54067	54067	1535	1535	269	269	2	2	2	2	2	2	2
SAL_HA5211AA	2031-12-01	PHE	SRR5055225;ILLUMINA;Paired;;SRX2376039;364711828;299	SAL_HA5211AA	Human	Human	Homo sapiens					North America	Canada							Typhimurium	I			National Microbiology Laboratory			PRJNA353625	SRP093623	SAMN06030195	SRS1819081	2016-11-27	2016-11-24	54020	54020	271	271	269	269	269	2	2	2	2	2	2	2
SAL_HA5375AA	ARIM-STM412-13	PHE	SRR5057139;ILLUMINA;Paired;500;SRX2377901;393901936;212	SAL_HA5375AA	Livestock	Bovine	ND	2013	3			South America	Argentina	Neuquen	Confluencia Department	Neuquen				Typhimurium	I			Food and Drug Administration - Center for Food Safety and Applied Nutrition (US)			PRJNA271293	SRP057694	SAMN03743931	SRS1820579	2016-11-28	2015-01-01	54209	54209	35613	35609	35609	269	269	2	2	2	2	2	2	2
SAL_HA5389AA	ARIM-STM1464-09	PHE	SRR5057129;ILLUMINA;Paired;500;SRX2377884;639623564;229	SRR5132024;ILLUMINA;Paired;500;SRX2445841;;	SAL_HA5389AA	Livestock	Bovine	ND	2009	7			South America	Argentina	Autonomous City of Buenos Aires		Buenos Aires				Typhimurium	I			Food and Drug Administration - Center for Food Safety and Applied Nutrition (US)			PRJNA271293	SRP057694	SAMN03743924	SRS1820564	2016-11-28	2015-01-01	54262	54262	54262	54262	54262	269	269	2	2	2	2	2	2	2
SAL_HA5751AA	PNUSAS005564	PHE	SRR5060619;ILLUMINA;Paired;;SRX2381148;321462176;206	SAL_HA5751AA	ND	ND						North America	United States							Typhimurium (Predicted)				Center for Diease Control and Prevention - Enteric Diseases Laboratory Branch (US)			PRJNA230403	SRP040281	SAMN06050858	SRS1823615	2016-11-30	2016-11-29	40233	40233	271	271	269	269	269	2	2	2	2	2	2	2
SAL_HA5843AA	PNUSAS005804	PHE	SRR5066043;ILLUMINA;Paired;;SRX2386407;165023166;231	SAL_HA5843AA	ND	ND						North America	United States							Typhimurium (Predicted)				Center for Diease Control and Prevention - Enteric Diseases Laboratory Branch (US)			PRJNA230403	SRP040281	SAMN06065903	SRS1828423	2016-12-01	2016-12-01	55741	55741	55741	55741	55741	55741	2	2	2	2	2	2	2	2
SAL_HA6011AA	16049293	PHE	traces-0xdmJZx;ILLUMINA;Paired;;NA;703600092;234	SAL_HA6011AA	Human			2016				Europe	Luxembourg							Typhimurium monophasic				Laboratoire National de SantÔøΩ							2016-12-05	2017-06-09	54976	54976	54976	54976	23264	2	2	2	2	2	2	2	2	2
SAL_HA6148AA	PNUSAS005421	PHE	SRR5081560;ILLUMINA;Paired;;SRX2399719;738943656;233	SAL_HA6148AA	ND	ND						North America	United States							Typhimurium (Predicted)				Center for Diease Control and Prevention - Enteric Diseases Laboratory Branch (US)			PRJNA230403	SRP040281	SAMN06033710	SRS1840133	2016-12-06	2016-12-06	56786	56786	56786	271	269	269	269	2	2	2	2	2	2	2
SAL_HA6163AA	PNUSAS005358	PHE	SRR5081545;ILLUMINA;Paired;;SRX2399704;413277540;246	SAL_HA6163AA	ND	ND						North America	United States							Typhimurium (Predicted)				Center for Diease Control and Prevention - Enteric Diseases Laboratory Branch (US)			PRJNA230403	SRP040281	SAMN06099712	SRS1840118	2016-12-06	2016-12-06	56611	56611	56611	56611	56611	3610	3610	2	2	2	2	2	2	2
SAL_HA6810AA	PNUSAS005612	PHE	SRR5110780;ILLUMINA;Paired;;SRX2423092;261376500;217	SAL_HA6810AA	ND	ND						North America	United States							Typhimurium (Predicted)				Center for Diease Control and Prevention - Enteric Diseases Laboratory Branch (US)			PRJNA230403	SRP040281	SAMN06072225	SRS1860159	2016-12-15	2016-12-14	56001	56001	271	271	269	269	269	2	2	2	2	2	2	2
SAL_HA6917AA	PNUSAS006086	PHE	SRR5110506;ILLUMINA;Paired;;SRX2422893;372136450;229	SAL_HA6917AA	ND	ND						North America	United States							Typhimurium (Predicted)				Center for Diease Control and Prevention - Enteric Diseases Laboratory Branch (US)			PRJNA230403	SRP040281	SAMN06132491	SRS1859961	2016-12-15	2016-12-14	55990	55741	55741	55741	55741	55741	2	2	2	2	2	2	2	2
SAL_HA7808AA	0000-0061-1785	PHE	SRR5120212;ILLUMINA;Paired;;SRX2435440;457446040;215	SAL_HA7808AA	Human	Human	stool; Homo sapiens; Age: 36; female	2016				North America	United States	Massachusetts	Suffolk County	Boston		42.3	-71	Typhimurium (Predicted)				Brigham & Women's Hospital			PRJNA278886	SRP056445	SAMN06007777	SRS1870659	2016-12-20	2016-12-20	47998	47998	271	271	269	269	269	2	2	2	2	2	2	2
SAL_HA8276AA	ARIM-STM1358-07	PHE	SRR5132033;ILLUMINA;Paired;500;SRX2445845;503262386;223	SAL_HA8276AA	Human	Human	Homo sapiens; stool	2007	7			South America	Argentina							Typhimurium				Food and Drug Administration - Center for Food Safety and Applied Nutrition (US)			PRJNA271293	SRP057694	SAMN06172163	SRS1879544	2016-12-28	2015-01-01	57489	57489	57489	57489	57489	269	269	2	2	2	2	2	2	2
SAL_HA8277AA	ARIM-STM1350-09	PHE	SRR5132029;ILLUMINA;Paired;500;SRX2445844;534066912;216	SAL_HA8277AA	Human	Human	Homo sapiens; stool	2009	7			South America	Argentina							Typhimurium				Food and Drug Administration - Center for Food Safety and Applied Nutrition (US)			PRJNA271293	SRP057694	SAMN06172151	SRS1879543	2016-12-28	2015-01-01	57496	57496	57496	57496	57496	57496	269	2	2	2	2	2	2	2
SAL_HA8284AA	ARIM-STM589-09	PHE	SRR5132021;ILLUMINA;Paired;500;SRX2445836;682535074;221	SAL_HA8284AA	Human	Human	Homo sapiens; stool	2009	3			South America	Argentina							Typhimurium				Food and Drug Administration - Center for Food Safety and Applied Nutrition (US)			PRJNA271293	SRP057694	SAMN06172153	SRS1879536	2016-12-28	2015-01-01	57491	57491	57491	57491	57491	269	269	2	2	2	2	2	2	2
SAL_HA8439AA	FSIS1609301	PHE	SRR5127021;ILLUMINA;Paired;300;SRX2441320;579899700;150	SAL_HA8439AA	Livestock	Bovine	Comminuted Beef	2016				North America	United States	Oregon					-111.6	Typhimurium	I			Department of Agriculture - Food Safety and Inspection Service (US)			PRJNA242847	SRP040648	SAMN06175396	SRS1875889	2016-12-28	2016-12-22	57306	57306	57306	271	269	269	269	2	2	2	2	2	2	2
SAL_HA8934AA	USDA-ARS-USMARC-1896	PHE	GCF_001623845;Complete Genome;;;;;	SAL_HA8934AA	Livestock	Bovine	bovine adipose trim; Bovine	2011	3			North America	United States							Typhimurium	I			USDA-ARS-USMARC			PRJNA224116		SAMN02716869		2017-01-05	2016-04-19	58349	58349	58349	58349	58349	269	269	2	2	2	2	2	2	2
SAL_HA8938AA	CDC 2009K-2059	PHE	GCF_001623775;Complete Genome;;;;;	SAL_HA8938AA	Human	Human	stool; Homo sapiens	2009	10			North America	United States							Typhimurium	I			USDA-ARS-USMARC			PRJNA224116		SAMN02716878		2017-01-05	2016-04-19	58340	58340	58340	271	269	269	269	2	2	2	2	2	2	2
SAL_HA9000AA	PNUSAS006085	PHE	SRR5145199;ILLUMINA;Paired;;SRX2463564;492544744;236	SAL_HA9000AA	ND	ND						North America	United States							Typhimurium (Predicted)				Center for Diease Control and Prevention - Enteric Diseases Laboratory Branch (US)			PRJNA230403	SRP040281	SAMN06186785	SRS1896094	2017-01-05	2017-01-04	58141	58141	58141	6	2	2	2	2	2	2	2	2	2	2
SAL_HA9099AA	FSIS1609380	PHE	SRR5152310;ILLUMINA;Paired;300;SRX2470211;364744252;149	SAL_HA9099AA	Livestock	Bovine	Animal-Cattle-Dairy Cow	2016				North America	United States	California						Typhimurium	I			Department of Agriculture - Food Safety and Inspection Service (US)			PRJNA292666	SRP062916	SAMN06210547	SRS1902326	2017-01-07	2017-01-06	47998	47998	271	271	269	269	269	2	2	2	2	2	2	2
SAL_HA9551AA	PNUSAS006691	PHE	SRR5159834;ILLUMINA;Paired;;SRX2478127;325291540;205	SAL_HA9551AA	ND	ND						North America	United States							Typhimurium (Predicted)				Center for Diease Control and Prevention - Enteric Diseases Laboratory Branch (US)			PRJNA230403	SRP040281	SAMN06203873	SRS1909338	2017-01-10	2017-01-09	58627	6278	6	6	2	2	2	2	2	2	2	2	2	2
SAL_HA9575AA	PNUSAS006693	PHE	SRR5159788;ILLUMINA;Paired;;SRX2478074;409042552;212	SAL_HA9575AA	ND	ND						North America	United States							Typhimurium (Predicted)				Center for Diease Control and Prevention - Enteric Diseases Laboratory Branch (US)			PRJNA230403	SRP040281	SAMN06203875	SRS1909293	2017-01-10	2017-01-09	58640	58640	271	271	269	269	269	2	2	2	2	2	2	2
SAL_IA0095AA	b51b4380-3918-11e6-bcc0-3c4a9275d6c8	PHE	ERR1788680;ILLUMINA;Paired;447;ERX1852403;455367250;125	SAL_IA0095AA																Typhimurium (Predicted)	I			The Wellcome Trust Sanger Institute			PRJEB9121	ERP010196	SAMEA4412625	ERS1324074	2017-01-15	2017-01-12	59157	59157	59157	59157	59157	2	2	2	2	2	2	2	2	2
SAL_IA0245AA	PNUSAS006831	PHE	SRR5184215;ILLUMINA;Paired;;SRX2500255;459092160;240	SAL_IA0245AA	ND	ND						North America	United States							Typhimurium (Predicted)				Center for Diease Control and Prevention - Enteric Diseases Laboratory Branch (US)			PRJNA230403	SRP040281	SAMN06215588	SRS1926858	2017-01-18	2017-01-18	59471	59471	59471	59471	269	269	269	2	2	2	2	2	2	2
SAL_IA0252AA	PNUSAS006819	PHE	SRR5184172;ILLUMINA;Paired;;SRX2500212;245700126;239	SAL_IA0252AA	ND	ND						North America	United States							Typhimurium (Predicted)				Center for Diease Control and Prevention - Enteric Diseases Laboratory Branch (US)			PRJNA230403	SRP040281	SAMN06214669	SRS1926815	2017-01-18	2017-01-18	59475	59475	59475	59475	20732	2	2	2	2	2	2	2	2	2
SAL_IA2392AA	S04	PHE	traces-0SHFSSP;ILLUMINA;Paired;;NA;175616324;257	traces-0kBeyWS;ILLUMINA;Paired;;NA;184487760;180	SAL_IA2392AA								Europe	Spain							Typhimurium (Predicted)				ITACyL							2017-04-20	2019-03-06	68868	68868	68868	61076	61072	2	2	2	2	2	2	2	2	2
SAL_IA2427AA	2014AM-2955	PHE	SRR5209737;ILLUMINA;Paired;;SRX2523252;816313950;225	SAL_IA2427AA	ND	ND						North America	United States							Typhimurium (Predicted)				Center for Diease Control and Prevention - Enteric Diseases Laboratory Branch (US)			PRJNA287785	SRP082403	SAMN06276970	SRS1944888	2017-01-27	2017-01-27	6225	6225	271	271	269	269	269	2	2	2	2	2	2	2
SAL_IA2432AA	PNUSAS007674	PHE	SRR5209732;ILLUMINA;Paired;;SRX2523247;250945170;245	SAL_IA2432AA	ND	ND						North America	United States							Typhimurium (Predicted)				Center for Diease Control and Prevention - Enteric Diseases Laboratory Branch (US)			PRJNA230403	SRP040281	SAMN06251754	SRS1944883	2017-01-27	2017-01-27	61151	36034	36034	271	269	269	269	2	2	2	2	2	2	2
SAL_IA2443AA	PNUSAS007644	PHE	SRR5209721;ILLUMINA;Paired;;SRX2523236;596377100;185	SAL_IA2443AA				2016	9			North America	United States							Typhimurium (Predicted)				Center for Diease Control and Prevention - Enteric Diseases Laboratory Branch (US)			PRJNA230403	SRP040281	SAMN06256341	SRS1944872	2017-01-27	2017-01-27	61139	61139	61139	61139	269	269	269	2	2	2	2	2	2	2
SAL_IA2520AA	SAL219	PHE	traces-0WoYSmu;ILLUMINA;Paired;;NA;280358916;222	SAL_IA2520AA	Livestock	Swine	Swine feces	2012	10	1		South America	Brazil	Minas Gerais						4	5	12:i:-	I		4	5	12:i:-	+55 11 3091 7296							2017-01-30	2017-08-04	61201	61201	61201	61201	61201	61201	269	2	2	2	2	2	2
SAL_IA2564AA	PNUSAS007456	PHE	SRR5217745;ILLUMINA;Paired;;SRX2527892;591296864;227	SAL_IA2564AA	ND	ND						North America	United States							Typhimurium (Predicted)				Center for Diease Control and Prevention - Enteric Diseases Laboratory Branch (US)			PRJNA230403	SRP040281	SAMN06274313	SRS1948740	2017-01-30	2017-01-30	61852	61852	271	271	269	269	269	2	2	2	2	2	2	2
SAL_IA2587AA	PNUSAS007338	PHE	SRR5217720;ILLUMINA;Paired;;SRX2527867;523189688;238	SAL_IA2587AA	ND	ND						North America	United States							Typhimurium (Predicted)				Center for Diease Control and Prevention - Enteric Diseases Laboratory Branch (US)			PRJNA230403	SRP040281	SAMN06270363	SRS1948716	2017-01-30	2017-01-30	61869	61869	59471	59471	269	269	269	2	2	2	2	2	2	2
SAL_IA2642AA	Salm201611479_S44	PHE	ERR1810536;ILLUMINA;Paired;500;ERX1873563;404150400;150	SAL_IA2642AA																Typhimurium (Predicted)	I			Institut Pasteur			PRJEB19219	ERP021203	SAMEA55237918	ERS1511765	2017-01-30	2017-01-30	61753	61748	61747	61747	61747	2	2	2	2	2	2	2	2	2
SAL_IA3400AA	319705	PHE	SRR5215734;ILLUMINA;Paired;;SRX2525945;330546160;98	SAL_IA3400AA	Human	Human	Human; Homo sapiens	2016	11			Europe	United Kingdom							Typhimurium	I			Public Health England			PRJNA248792	SRP042645	SAMN06278303	SRS1946810	2017-01-30	2017-01-30	61351	61351	61351	61351	1891	269	269	2	2	2	2	2	2	2
SAL_IA3410AA	285851	PHE	SRR5215724;ILLUMINA;Paired;;SRX2525935;233000292;98	SAL_IA3410AA	Human	Human	Human; Homo sapiens	2016	8			Europe	United Kingdom							Typhimurium	I			Public Health England			PRJNA248792	SRP042645	SAMN06278291	SRS1946800	2017-01-30	2017-01-30	61282	61282	61282	61282	61282	269	269	2	2	2	2	2	2	2
SAL_IA3795AA	PNUSAS007557	PHE	SRR5221488;ILLUMINA;Paired;;SRX2531264;378916340;242	SAL_IA3795AA	ND	ND						North America	United States							Typhimurium (Predicted)				Center for Diease Control and Prevention - Enteric Diseases Laboratory Branch (US)			PRJNA230403	SRP040281	SAMN06276494	SRS1952113	2017-02-01	2017-02-01	62402	62402	62402	62402	62402	269	269	2	2	2	2	2	2	2
SAL_IA3798AA	PNUSAS007636	PHE	SRR5221485;ILLUMINA;Paired;;SRX2531261;340710720;245	SAL_IA3798AA	ND	ND						North America	United States							Typhimurium (Predicted)				Center for Diease Control and Prevention - Enteric Diseases Laboratory Branch (US)			PRJNA230403	SRP040281	SAMN06276484	SRS1952109	2017-02-01	2017-02-01	62403	62403	62402	62402	62402	269	269	2	2	2	2	2	2	2
SAL_IA4878AA	FSIS1709921	PHE	SRR5229516;ILLUMINA;Paired;300;SRX2538150;355090200;150	SAL_IA4878AA	Livestock	Swine	Product-Raw-Ground	Comminuted or Otherwise Nonintact-Pork	2016				North America	United States	New York		New York				I 4	[5]	12:I:-	I			Department of Agriculture - Food Safety and Inspection Service (US)			PRJNA242847	SRP040648	SAMN06291491	SRS1957946	2017-02-05	2017-02-04	62866	62866	62866	62866	2	2	2	2	2	2	2	2	2	2
SAL_IA5372AA	FSIS1710002	PHE	SRR5235493;ILLUMINA;Paired;300;SRX2542559;302665190;149	SAL_IA5372AA	Livestock	Swine	Product-Raw-Ground	Comminuted or Otherwise Nonintact-Pork	2017				North America	United States	North Carolina						Typhimurium monophasic	I		I 4	[5]	12:I:-	Department of Agriculture - Food Safety and Inspection Service (US)			PRJNA242847	SRP040648	SAMN06307787	SRS1961697	2017-02-08	2017-02-07	63141	63141	63141	63141	2	2	2	2	2	2	2	2	2	2
SAL_IA5764AA	MS150009	PHE	ERR1823830;ILLUMINA;Paired;500;ERX1886334;394780260;98	SAL_IA5764AA	Human	Human	Homo sapiens; Human	2015				Europe	Ireland							Typhimurium	Subsp. I			University Hospital Galway			PRJEB18998	ERP020979	SAMEA81160168	ERS1546328	2017-02-14	2017-02-10	416	416	416	416	416	416	416	2	2	2	2	2	2	2
SAL_IA5894AA	MS160419	PHE	ERR1817532;ILLUMINA;Paired;500;ERX1880031;418782276;99	SAL_IA5894AA	Human	Human	Homo sapiens; Human	2016				Europe	Ireland							Typhimurium	Subsp. I			University Hospital Galway			PRJEB18998	ERP020979	SAMEA80167168	ERS1545004	2017-02-14	2017-02-09	63244	63244	63244	63244	63244	63244	63244	2	2	2	2	2	2	2
SAL_IA6092AA	CFSAN059125	PHE	SRR5238285;ILLUMINA;Paired;500;SRX2545248;218519760;277	SAL_IA6092AA	Animal feed	ND	Bone Meal Fertilizer	2016				North America	United States	California						Enteritidis				Food and Drug Administration - Center for Food Safety and Applied Nutrition (US)			PRJNA186035	SRP018785	SAMN06213823	SRS1964153	2017-02-14	2015-01-01	63560	63560	63560	271	269	269	269	2	2	2	2	2	2	2
SAL_IA6217AA	PNUSAS008221	PHE	SRR5238154;ILLUMINA;Paired;;SRX2545121;460096208;242	SAL_IA6217AA								North America	United States							Typhimurium (Predicted)				Center for Diease Control and Prevention - Enteric Diseases Laboratory Branch (US)			PRJNA230403	SRP040281	SAMN06294088	SRS1964026	2017-02-14	2017-02-08	63468	63468	6	6	2	2	2	2	2	2	2	2	2	2
SAL_IA6607AA	FSIS1710367	PHE	SRR5271466;ILLUMINA;Paired;300;SRX2575514;388254208;128	SAL_IA6607AA	Livestock	Bovine	Animal-Cattle-Beef Cow	2017				North America	United States	California						Typhimurium	I			Department of Agriculture - Food Safety and Inspection Service (US)			PRJNA292666	SRP062916	SAMN06346636	SRS1991255	2017-02-21	2017-02-18	47998	47998	271	271	269	269	269	2	2	2	2	2	2	2
SAL_IA6659AA	PNUSAS008081	PHE	SRR5277759;ILLUMINA;Paired;;SRX2581649;576920832;192	SAL_IA6659AA	ND	ND						North America	United States							Typhimurium (Predicted)				Center for Diease Control and Prevention - Enteric Diseases Laboratory Branch (US)			PRJNA230403	SRP040281	SAMN06341087	SRS1995671	2017-02-22	2017-02-22	64479	64479	64479	64479	64479	269	269	2	2	2	2	2	2	2
SAL_IA6945AA	MS150138	PHE	ERR1829775;ILLUMINA;Paired;500;ERX1891751;317546460;98	SAL_IA6945AA	Human	Human	Homo sapiens; Human	2015				Europe	Ireland							Typhimurium	Subsp. I			University Hospital Galway			PRJEB18998	ERP020979	SAMEA87815668	ERS1555202	2017-02-22	2017-02-21	393	393	393	393	393	269	269	2	2	2	2	2	2	2
SAL_IA6963AA	MS150110	PHE	ERR1824576;ILLUMINA;Paired;500;ERX1886735;334978896;98	SAL_IA6963AA	Human	Human	Homo sapiens; Human	2015				Europe	Ireland							Typhimurium	Subsp. I			University Hospital Galway			PRJEB18998	ERP020979	SAMEA81468418	ERS1546739	2017-02-22	2017-02-21	399	399	399	399	399	2	2	2	2	2	2	2	2	2
SAL_IA7205AA	PNUSAS008708	PHE	SRR5278666;ILLUMINA;Paired;;SRX2582506;395889800;230	SAL_IA7205AA								North America	United States							Typhimurium (Predicted)				Center for Diease Control and Prevention - Enteric Diseases Laboratory Branch (US)			PRJNA230403	SRP040281	SAMN06346089	SRS1996514	2017-02-23	2017-02-22	64582	64582	2633	2633	2	2	2	2	2	2	2	2	2	2
SAL_IA8378AA	PNUSAS009055	PHE	SRR5336307;ILLUMINA;Paired;;SRX2633729;330687664;248	SAL_IA8378AA	ND	ND						North America	United States							Typhimurium (Predicted)				Center for Diease Control and Prevention - Enteric Diseases Laboratory Branch (US)			PRJNA230403	SRP040281	SAMN06481923	SRS2042959	2017-03-12	2017-03-10	65518	65518	65518	65518	65518	65518	3610	2	2	2	2	2	2	2
SAL_IA8443AA	17001063	PHE	traces-0sYOBcH;ILLUMINA;Paired;;NA;610438668;147	SAL_IA8443AA	Human			2017				Europe	Luxembourg							Typhimurium				Laboratoire National de SantÔøΩ							2017-03-13	2017-09-15	65548	65548	65548	65548	65548	65548	2	2	2	2	2	2	2	2
SAL_IA8874AA	PNUSAS009151	PHE	SRR5341697;ILLUMINA;Paired;;SRX2638372;544816032;228	SAL_IA8874AA								North America	United States							Typhimurium (Predicted)				Center for Diease Control and Prevention - Enteric Diseases Laboratory Branch (US)			PRJNA230403	SRP040281	SAMN06481556	SRS2046357	2017-03-15	2017-03-14	65713	65713	271	271	269	269	269	2	2	2	2	2	2	2
SAL_IA8996AA	FSIS1710856	PHE	SRR5346349;ILLUMINA;Paired;300;SRX2642979;382294068;149	SAL_IA8996AA	Livestock	Bovine	Animal-Cattle-Dairy Cow	2017				North America	United States	California						Typhimurium	I			Department of Agriculture - Food Safety and Inspection Service (US)			PRJNA292666	SRP062916	SAMN06603819	SRS2050405	2017-03-16	2017-03-15	65942	65942	271	271	269	269	269	2	2	2	2	2	2	2
SAL_IA9039AA	FSIS1710399	PHE	SRR5344863;ILLUMINA;Paired;300;SRX2641562;282683100;150	SAL_IA9039AA	Livestock	Bovine	Comminuted Beef	2017				North America	United States	Utah						Typhimurium	I			Department of Agriculture - Food Safety and Inspection Service (US)			PRJNA242847	SRP040648	SAMN06602773	SRS2049036	2017-03-16	2017-03-16	65865	65865	65865	271	269	269	269	2	2	2	2	2	2	2
SAL_IA9367AA	PNUSAS006932	PHE	SRR5361040;ILLUMINA;Paired;;SRX2656821;676897990;145	SAL_IA9367AA	ND	ND						North America	United States							Typhimurium (Predicted)				Center for Diease Control and Prevention - Enteric Diseases Laboratory Branch (US)			PRJNA230403	SRP040281	SAMN06368969	SRS2060350	2017-03-20	2017-03-20	66308	66308	66308	66308	66308	66308	66308	2	2	2	2	2	2	2
SAL_IA9782AA	FSIS1711039	PHE	SRR5365054;ILLUMINA;Paired;300;SRX2660472;351213300;150	SAL_IA9782AA	Livestock	Swine	Animal-Swine-Market Swine	2017				North America	United States	North Carolina						I 4	[5]	12:I:-	I			Department of Agriculture - Food Safety and Inspection Service (US)			PRJNA292666	SRP062916	SAMN06624529	SRS2062651	2017-03-22	2017-03-21	66682	66682	66682	5994	2	2	2	2	2	2	2	2	2	2
SAL_JA0201AA	PNUSAS009616	PHE	SRR5379139;ILLUMINA;Paired;;SRX2674384;297631500;230	SAL_JA0201AA	ND	ND						North America	United States							Typhimurium				Center for Diease Control and Prevention - Enteric Diseases Laboratory Branch (US)			PRJNA230403	SRP040281	SAMN06625030	SRS2073513	2017-03-27	2017-03-27	66984	66984	66984	6	2	2	2	2	2	2	2	2	2	2
SAL_JA0273AA	PNUSAS009158	PHE	SRR5380954;ILLUMINA;Paired;;SRX2676177;631056636;226	SAL_JA0273AA								North America	United States							Typhimurium (Predicted)				Center for Diease Control and Prevention - Enteric Diseases Laboratory Branch (US)			PRJNA230403	SRP040281	SAMN06629743	SRS2074734	2017-03-28	2017-03-27	67155	67155	67155	67155	67155	269	269	2	2	2	2	2	2	2
SAL_JA0895AA	PNUSAS008963	PHE	SRR5408988;ILLUMINA;Paired;;SRX2701278;538698006;189	SAL_JA0895AA	ND	ND						North America	United States							Typhimurium (Predicted)				Center for Diease Control and Prevention - Enteric Diseases Laboratory Branch (US)			PRJNA230403	SRP040281	SAMN06661481	SRS2095235	2017-04-04	2017-04-03	67323	67323	5560	6	2	2	2	2	2	2	2	2	2	2
SAL_JA1096AA	PNUSAS010453	PHE	SRR5418841;ILLUMINA;Paired;;SRX2710386;518296644;243	SAL_JA1096AA	ND	ND						North America	United States							Typhimurium (Predicted)				Center for Diease Control and Prevention - Enteric Diseases Laboratory Branch (US)			PRJNA230403	SRP040281	SAMN06677648	SRS2102132	2017-04-06	2017-04-05	67762	67762	67762	67762	67762	67762	3610	2	2	2	2	2	2	2
SAL_JA1740AA	PNUSAS011347	PHE	SRR5438396;ILLUMINA;Paired;;SRX2728338;757560936;246	SAL_JA1740AA								North America	United States							Typhimurium (Predicted)				Center for Diease Control and Prevention - Enteric Diseases Laboratory Branch (US)			PRJNA230403	SRP040281	SAMN06704736	SRS2116449	2017-04-12	2017-04-12	68349	68349	68349	68349	68349	68349	2	2	2	2	2	2	2	2
SAL_JA1754AA	PNUSAS009356	PHE	SRR5438374;ILLUMINA;Paired;;SRX2728316;552941760;240	SAL_JA1754AA								North America	United States							Typhimurium (Predicted)				Center for Diease Control and Prevention - Enteric Diseases Laboratory Branch (US)			PRJNA230403	SRP040281	SAMN06711372	SRS2116427	2017-04-12	2017-04-12	47998	47998	271	271	269	269	269	2	2	2	2	2	2	2
SAL_JA1765AA	PNUSAS011289	PHE	SRR5437010;ILLUMINA;Paired;;SRX2726950;845506920;246	SAL_JA1765AA								North America	United States							Typhimurium (Predicted)				Center for Diease Control and Prevention - Enteric Diseases Laboratory Branch (US)			PRJNA230403	SRP040281	SAMN06704515	SRS2115245	2017-04-12	2017-04-11	68299	68299	68299	65518	65518	65518	3610	2	2	2	2	2	2	2
SAL_JA2368AA	FSIS1710658	PHE	SRR5456154;ILLUMINA;Paired;300;SRX2744281;636535864;148	SAL_JA2368AA	Livestock	Bovine	product-raw-intact-beef	2017				North America	United States	Utah						Typhimurium	I			Department of Agriculture - Food Safety and Inspection Service (US)			PRJNA242847	SRP040648	SAMN06761486	SRS2130838	2017-04-19	2017-04-18	68864	68864	271	271	269	269	269	2	2	2	2	2	2	2
SAL_JA2374AA	PNUSAS011194	PHE	SRR5460974;ILLUMINA;Paired;;SRX2748969;566512596;234	SAL_JA2374AA								North America	United States							Typhimurium (Predicted)				Center for Diease Control and Prevention - Enteric Diseases Laboratory Branch (US)			PRJNA230403	SRP040281	SAMN06765391	SRS2135033	2017-04-20	2017-04-20	69119	69119	271	271	269	269	269	2	2	2	2	2	2	2
SAL_JA2853AA	FSIS1710985	PHE	SRR5471237;ILLUMINA;Paired;300;SRX2758798;551993400;150	SAL_JA2853AA	Livestock	Bovine	product-raw-intact-beef	2017				North America	United States	Utah						Typhimurium	I			Department of Agriculture - Food Safety and Inspection Service (US)			PRJNA242847	SRP040648	SAMN06826828	SRS2143795	2017-04-25	2017-04-24	68864	68864	271	271	269	269	269	2	2	2	2	2	2	2
SAL_JA3019AA	PNUSAS008994	PHE	SRR5488933;ILLUMINA;Paired;;SRX2771778;532104860;235	SAL_JA3019AA								North America	United States							Typhimurium (Predicted)				Center for Diease Control and Prevention - Enteric Diseases Laboratory Branch (US)			PRJNA230403	SRP040281	SAMN06457912	SRS2155177	2017-05-02	2017-05-01	69783	69783	69783	69783	48932	3610	3610	2	2	2	2	2	2	2
SAL_JA3214AA	PNUSAS012013	PHE	SRR5486669;ILLUMINA;Paired;;SRX2769573;219077352;244	SAL_JA3214AA								North America	United States							Typhimurium (Predicted)				Center for Diease Control and Prevention - Enteric Diseases Laboratory Branch (US)			PRJNA230403	SRP040281	SAMN06761656	SRS2153201	2017-05-02	2017-04-29	69659	69659	271	271	269	269	269	2	2	2	2	2	2	2
SAL_JA3409AA	PNUSAS011940	PHE	SRR5486150;ILLUMINA;Paired;;SRX2769058;456847056;244	SAL_JA3409AA	ND	ND						North America	United States							Typhimurium (Predicted)				Center for Diease Control and Prevention - Enteric Diseases Laboratory Branch (US)			PRJNA230403	SRP040281	SAMN06827043	SRS2152697	2017-05-02	2017-04-29	69519	69519	69519	69519	269	269	269	2	2	2	2	2	2	2
SAL_JA3430AA	FSIS1700737	PHE	SRR5486104;ILLUMINA;Paired;300;SRX2769007;283276416;149	SAL_JA3430AA	Livestock	Swine	Product-Raw-Ground	Comminuted or Otherwise Nonintact-Pork	2017				North America	United States	Massachusetts						Typhimurium monophasic	I		I 4	[5]	12:I:-	Department of Agriculture - Food Safety and Inspection Service (US)			PRJNA242847	SRP040648	SAMN06847243	SRS2152646	2017-05-02	2017-04-28	69469	69469	69469	69469	2	2	2	2	2	2	2	2	2	2
SAL_JA3978AA	PNUSAS011466	PHE	SRR5501168;ILLUMINA;Paired;;SRX2780621;247221312;208	SAL_JA3978AA								North America	United States							Typhimurium (Predicted)				Center for Diease Control and Prevention - Enteric Diseases Laboratory Branch (US)			PRJNA230403	SRP040281	SAMN06842829	SRS2163711	2017-05-05	2017-05-03	70168	70168	70160	6	2	2	2	2	2	2	2	2	2	2
SAL_JA4625AA	CVM 43815	PHE	SRR5573114;ILLUMINA;Paired;;SRX2831786;385262024;238	SAL_JA4625AA	Human	Human	human; clinical sample	2012				North America	United States							Typhimurium (Predicted)				Food and Drug Administration (US)			PRJNA242614	SRP076913	SAMN02911984	SRS2206811	2017-05-18	2017-05-17	70729	70729	70729	49026	3610	3610	3610	2	2	2	2	2	2	2
SAL_JA4645AA	CVM 43795	PHE	SRR5573094;ILLUMINA;Paired;;SRX2831766;445746756;237	SAL_JA4645AA	Human	Human	human; clinical sample	2011				North America	United States							Typhimurium (Predicted)				Food and Drug Administration (US)			PRJNA242614	SRP076913	SAMN02911964	SRS2206791	2017-05-18	2017-05-17	70966	70966	70966	70966	269	269	269	2	2	2	2	2	2	2
SAL_JA4779AA	123975	PHE	SRR5565039;ILLUMINA;Paired;;SRX2826719;298899582;93	SAL_JA4779AA	Human	Human	human; Homo sapiens	2015	6			Europe	United Kingdom							Typhimurium	I			Public Health England			PRJNA248792	SRP042645	SAMN07125426	SRS2202798	2017-05-18	2017-05-16	70636	2305	1441	1441	2	2	2	2	2	2	2	2	2	2
SAL_JA4781AA	194201	PHE	SRR5565037;ILLUMINA;Paired;;SRX2826717;357565862;97	SAL_JA4781AA	Environment	ND	Enviromental	2015	12			Europe	United Kingdom							Typhimurium monophasic	I			Public Health England		monophasic	PRJNA248792	SRP042645	SAMN07125415	SRS2202794	2017-05-18	2017-05-16	70638	70638	70638	70638	70638	2	2	2	2	2	2	2	2	2
SAL_JA5048AA	FSIS1700730	PHE	SRR5576032;ILLUMINA;Paired;300;SRX2834278;318292608;149	SAL_JA5048AA	Livestock	Swine	Product-Raw-Intact-Pork	2017				North America	United States	Texas						Typhimurium	I			Department of Agriculture - Food Safety and Inspection Service (US)			PRJNA242847	SRP040648	SAMN07141734	SRS2208662	2017-05-19	2017-05-18	70813	70813	70813	70813	70813	70813	3610	2	2	2	2	2	2	2
SAL_JA5113AA	PNUSAS013711	PHE	SRR5578826;ILLUMINA;Paired;;SRX2837038;374932474;203	SAL_JA5113AA	ND	ND	ND					North America	United States							Typhimurium (Predicted)				Center for Diease Control and Prevention - Enteric Diseases Laboratory Branch (US)			PRJNA230403	SRP040281	SAMN07120572	SRS2211215	2017-05-20	2017-05-19	70987	70987	70987	271	269	269	269	2	2	2	2	2	2	2
SAL_JA5419AA	PNUSAS005250	PHE	SRR5585255;ILLUMINA;Paired;;SRX2843169;475468112;223	SAL_JA5419AA	ND	ND						North America	United States							Typhimurium (Predicted)				Centers for Disease Control and Prevention - PulseNet			PRJNA230403	SRP040281	SAMN06010566	SRS2216488	2017-05-23	2017-05-22	72145	72145	36034	271	269	269	269	2	2	2	2	2	2	2
SAL_JA5630AA	PNUSAS013580	PHE	SRR5585026;ILLUMINA;Paired;;SRX2842939;465044686;241	SAL_JA5630AA								North America	United States							Typhimurium (Predicted)				Centers for Disease Control and Prevention - PulseNet			PRJNA230403	SRP040281	SAMN06927756	SRS2216258	2017-05-23	2017-05-22	71910	71910	71910	71910	49543	49543	3610	2	2	2	2	2	2	2
SAL_JA6329AA	366343	PHE	SRR5583834;ILLUMINA;Paired;;SRX2841747;344867776;88	SAL_JA6329AA	Human	Human	human; Homo sapiens	2017	4			Europe	United Kingdom							Typhimurium monophasic	I			Public Health England		monophasic	PRJNA248792	SRP042645	SAMN07153950	SRS2215082	2017-05-23	2017-05-23	71379	71379	71379	6	2	2	2	2	2	2	2	2	2	2
SAL_JA6394AA	FSIS1701024	PHE	SRR5583278;ILLUMINA;Paired;500;SRX2841191;440005440;246	SAL_JA6394AA	Livestock	Bovine	comminuted beef	2017				North America	United States	California						Typhimurium	I			Department of Agriculture - Food Safety and Inspection Service (US)			PRJNA242847	SRP040648	SAMN07151984	SRS2214523	2017-05-23	2017-05-22	71309	71309	71309	71309	269	269	269	2	2	2	2	2	2	2
SAL_JA6406AA	335261	PHE	SRR5583248;ILLUMINA;Paired;;SRX2841161;260208126;97	SAL_JA6406AA	Human	Human	human; Homo sapiens	2017	1			Europe	United Kingdom							Typhimurium	I			Public Health England			PRJNA248792	SRP042645	SAMN07152538	SRS2214496	2017-05-23	2017-05-23	71630	71630	71630	71630	71630	269	269	2	2	2	2	2	2	2
SAL_JA6646AA	PNUSAS014098	PHE	SRR5590300;ILLUMINA;Paired;;SRX2847406;606614102;233	SAL_JA6646AA	ND	ND						North America	United States							Typhimurium (Predicted)				Center for Diease Control and Prevention - Enteric Diseases Laboratory Branch (US)			PRJNA230403	SRP040281	SAMN07149938	SRS2220378	2017-05-24	2017-05-23	72562	72562	36034	271	269	269	269	2	2	2	2	2	2	2
SAL_JA6801AA	PNUSAS013283	PHE	SRR5588550;ILLUMINA;Paired;;SRX2845846;258021288;243	SAL_JA6801AA	ND	ND						North America	United States							Typhimurium	I			Center for Diease Control and Prevention - Enteric Diseases Laboratory Branch (US)			PRJNA230403	SRP040281	SAMN07141955	SRS2218859	2017-05-24	2017-05-23	72357	72357	271	271	269	269	269	2	2	2	2	2	2	2
SAL_JA6902AA	357990	PHE	SRR5585292;ILLUMINA;Paired;;SRX2843206;352465800;100	SAL_JA6902AA	Human	Human	human; Homo sapiens	2017	3			Europe	United Kingdom							Typhimurium	I			Public Health England			PRJNA248792	SRP042645	SAMN07155939	SRS2216525	2017-05-24	2017-05-24	72253	72253	72253	72253	72253	72253	269	2	2	2	2	2	2	2
SAL_JA7021AA	PNUSAS014188	PHE	SRR5605955;ILLUMINA;Paired;;SRX2858490;821253540;229	SAL_JA7021AA	ND	ND						North America	United States							Typhimurium (Predicted)				Center for Diease Control and Prevention - Enteric Diseases Laboratory Branch (US)			PRJNA230403	SRP040281	SAMN07151610	SRS2229177	2017-05-26	2017-05-25	72771	72771	72771	271	269	269	269	2	2	2	2	2	2	2
SAL_JA7109AA	PNUSAS013997	PHE	SRR5605867;ILLUMINA;Paired;;SRX2858402;443593722;247	SAL_JA7109AA	ND	ND						North America	United States							Typhimurium (Predicted)				Center for Diease Control and Prevention - Enteric Diseases Laboratory Branch (US)			PRJNA230403	SRP040281	SAMN07159161	SRS2229089	2017-05-26	2017-05-25	72698	72698	72698	72683	2	2	2	2	2	2	2	2	2	2
SAL_JA7125AA	PNUSAS013990	PHE	SRR5605850;ILLUMINA;Paired;;SRX2858385;255387424;248	SAL_JA7125AA	ND	ND						North America	United States							Typhimurium (Predicted)				Center for Diease Control and Prevention - Enteric Diseases Laboratory Branch (US)			PRJNA230403	SRP040281	SAMN07159154	SRS2229072	2017-05-26	2017-05-25	72678	72678	72678	72678	72678	3610	3610	2	2	2	2	2	2	2
SAL_JA7211AA	10-24-20170359	PHE	traces-0LWfkSS;ILLUMINA;Paired;;NA;1042363856;236	SAL_JA7211AA								Europe	United Kingdom	Scotland						Typhimurium				D. Brown (Scotland)	120						2017-05-30	2017-12-02	72443	72443	72443	72443	2	2	2	2	2	2	2	2	2	2
SAL_JA7241AA	FSIS1701462	PHE	SRR5632662;ILLUMINA;Paired;500;SRX2872525;364059420;241	SAL_JA7241AA	Livestock	Swine	Product-Raw-Ground	Comminuted or Otherwise Nonintact-Pork	2017				North America	United States	Florida						I 4	[5]	12:I:-	I			Department of Agriculture - Food Safety and Inspection Service (US)			PRJNA242847	SRP040648	SAMN07180157	SRS2242647	2017-05-31	2017-05-31	73016	73016	73016	5994	2	2	2	2	2	2	2	2	2	2
SAL_JA7432AA	PNUSAS013091	PHE	SRR5628564;ILLUMINA;Paired;;SRX2869089;562029260;185	SAL_JA7432AA	ND	ND						North America	United States							Typhimurium (Predicted)				Center for Diease Control and Prevention - Enteric Diseases Laboratory Branch (US)			PRJNA230403	SRP040281	SAMN06925969	SRS2239462	2017-05-31	2017-05-30	72852	72852	72852	72852	72852	72852	3610	2	2	2	2	2	2	2
SAL_JA7815AA	369999	PHE	SRR5633345;ILLUMINA;Paired;;SRX2873196;371817072;99	SAL_JA7815AA	Human	Human	human; Homo sapiens	2017	5			Europe	United Kingdom							Typhimurium - Monophasic	I			Public Health England			PRJNA248792	SRP042645	SAMN07180807	SRS2243318	2017-06-02	2017-06-01	73541	73541	73541	73541	73541	2	2	2	2	2	2	2	2	2
SAL_JA7833AA	343760	PHE	SRR5633248;ILLUMINA;Paired;;SRX2873099;261836368;97	SAL_JA7833AA	Human	Human	human; Homo sapiens	2017	2			Europe	United Kingdom							Typhimurium	I			Public Health England			PRJNA248792	SRP042645	SAMN07180782	SRS2243220	2017-06-02	2017-06-01	73556	73556	21427	21427	1891	269	269	2	2	2	2	2	2	2
SAL_JA8012AA	346529	PHE	SRR5632956;ILLUMINA;Paired;;SRX2872807;417124620;90	SAL_JA8012AA	Human	Human	human; Homo sapiens	2017	2			Europe	United Kingdom							Typhimurium	I			Public Health England			PRJNA248792	SRP042645	SAMN07180570	SRS2242929	2017-06-02	2017-06-01	73404	73404	73404	73404	2	2	2	2	2	2	2	2	2	2
SAL_JA8018AA	366327	PHE	SRR5632945;ILLUMINA;Paired;;SRX2872796;262299128;91	SAL_JA8018AA	Human	Human	human; Homo sapiens	2017	4			Europe	United Kingdom							Typhimurium - Monophasic	I			Public Health England			PRJNA248792	SRP042645	SAMN07180568	SRS2242919	2017-06-02	2017-06-01	73385	73385	73385	73385	2	2	2	2	2	2	2	2	2	2
SAL_JA8046AA	329124	PHE	SRR5632878;ILLUMINA;Paired;;SRX2872729;412096076;98	SAL_JA8046AA	Human	Human	human; Homo sapiens	2016	12			Europe	United Kingdom							Typhimurium monophasic	I			Public Health England		monophasic	PRJNA248792	SRP042645	SAMN07180502	SRS2242851	2017-06-02	2017-06-01	73359	73359	73359	73359	27077	2	2	2	2	2	2	2	2	2
SAL_JA8204AA	369056	PHE	SRR5632196;ILLUMINA;Paired;;SRX2872059;324080460;99	SAL_JA8204AA	Human	Human	human; Homo sapiens	2017	5			Europe	United Kingdom							Typhimurium	I			Public Health England			PRJNA248792	SRP042645	SAMN07180289	SRS2242184	2017-06-02	2017-06-01	73239	73239	73239	73239	73239	73239	73239	2	2	2	2	2	2	2
SAL_JA8425AA	367497	PHE	SRR5631555;ILLUMINA;Paired;;SRX2871426;249168200;92	SAL_JA8425AA	Human	Human	human; Homo sapiens	2017	5			Europe	United Kingdom							Typhimurium	I			Public Health England			PRJNA248792	SRP042645	SAMN07179436	SRS2241586	2017-06-02	2017-06-01	73058	73058	73058	73058	73058	269	269	2	2	2	2	2	2	2
SAL_JA8438AA	360357	PHE	SRR5631542;ILLUMINA;Paired;;SRX2871413;234527132;98	SAL_JA8438AA	Human	Human	human; Homo sapiens	2017	4			Europe	United Kingdom							Typhimurium	I			Public Health England			PRJNA248792	SRP042645	SAMN07179441	SRS2241572	2017-06-02	2017-06-01	73060	73060	1499	1499	1499	269	269	2	2	2	2	2	2	2
SAL_JA8441AA	348037	PHE	SRR5631344;ILLUMINA;Paired;;SRX2871264;229209260;98	SAL_JA8441AA	Human	Human	human; Homo sapiens	2013	6			Europe	United Kingdom							Typhimurium	I			Public Health England			PRJNA248792	SRP042645	SAMN07179349	SRS2241423	2017-06-02	2017-06-01	2373	2373	271	271	269	269	269	2	2	2	2	2	2	2
SAL_JA8467AA	11-18-20170366	PHE	traces-0VTatdA;ILLUMINA;Paired;;NA;611302880;226	SAL_JA8467AA								Europe	United Kingdom	Scotland						Typhimurium				D. Brown (Scotland)	Untypable						2017-06-05	2017-12-08	73721	73721	73721	1891	1891	269	269	2	2	2	2	2	2	2
SAL_JA8868AA	FSIS1701479	PHE	SRR5683870;ILLUMINA;Paired;300;SRX2918866;459085688;149	SAL_JA8868AA	Livestock	Bovine	animal-cattle-dairy cow	2017				North America	United States	Nebraska						Typhimurium	I			Department of Agriculture - Food Safety and Inspection Service (US)			PRJNA292666	SRP062916	SAMN07237758	SRS2284870	2017-06-15	2017-06-14	74543	74543	271	271	269	269	269	2	2	2	2	2	2	2
SAL_JA8936AA	FSIS1701792	PHE	SRR5681048;ILLUMINA;Paired;300;SRX2916373;527142256;148	SAL_JA8936AA	Livestock	Swine	Product-Raw-Intact-Pork	2017				North America	United States	New Jersey						Typhimurium	I			Department of Agriculture - Food Safety and Inspection Service (US)			PRJNA242847	SRP040648	SAMN07230015	SRS2282525	2017-06-15	2017-06-14	74918	74918	74918	30476	2	2	2	2	2	2	2	2	2	2
SAL_JA9078AA	PNUSAS014969	PHE	SRR5667135;ILLUMINA;Paired;;SRX2902723;382265100;235	SRR5655465;ILLUMINA;Paired;;SRX2892058;382265100;235	SAL_JA9078AA	ND	ND						North America	United States							Typhimurium	I			Center for Diease Control and Prevention - Enteric Diseases Laboratory Branch (US)			PRJNA230403	SRP040281	SAMN07190303	SRS2259816	2017-06-15	2017-06-13	74786	74786	271	271	269	269	269	2	2	2	2	2	2	2
SAL_JA9183AA	E2016000407	PHE	SRR5664166;ILLUMINA;Paired;500;SRX2899795;408812390;245	SAL_JA9183AA	ND	Swine	Porcine Intestine	2015	7			North America	United States	Minnesota						Typhimurium				Food and Drug Administration - Center for Food Safety and Applied Nutrition (US)			PRJNA215333	SRP032981	SAMN06034100	SRS2267043	2017-06-15	2017-06-09	74853	74853	74853	59471	269	269	269	2	2	2	2	2	2	2
SAL_JA9306AA	PNUSAS014533	PHE	SRR5659622;ILLUMINA;Paired;;SRX2895929;230141444;221	SAL_JA9306AA								North America	United States							Typhimurium (Predicted)				Center for Diease Control and Prevention - Enteric Diseases Laboratory Branch (US)			PRJNA230403	SRP040281	SAMN07193995	SRS2263392	2017-06-15	2017-06-09	74574	74574	74574	74574	58425	2	2	2	2	2	2	2	2	2
SAL_JA9745AA	FSIS1701632	PHE	SRR5684062;ILLUMINA;Paired;500;SRX2919016;360683232;246	SAL_JA9745AA	Livestock	Swine	Product-Raw-Intact-Pork	2017				North America	United States	Iowa						I 4	[5]	12:I:-	I			Department of Agriculture - Food Safety and Inspection Service (US)			PRJNA242847	SRP040648	SAMN07237715	SRS2285019	2017-06-16	2017-06-14	74523	74523	74523	74523	2	2	2	2	2	2	2	2	2	2
SAL_KA0044AA	PNUSAS015572	PHE	SRR5714265;ILLUMINA;Paired;;SRX2934636;277008822;243	SAL_KA0044AA								North America	United States							Typhimurium (Predicted)				Center for Diease Control and Prevention - Enteric Diseases Laboratory Branch (US)			PRJNA230403	SRP040281	SAMN07224014	SRS2296960	2017-06-20	2017-06-20	75297	75297	75297	271	269	269	269	2	2	2	2	2	2	2
SAL_KA0549AA	PNUSAS016035	PHE	SRR5742173;ILLUMINA;Paired;;SRX2947119;194439936;248	SAL_KA0549AA	ND	ND						North America	United States											Center for Diease Control and Prevention - Enteric Diseases Laboratory Branch (US)			PRJNA230403	SRP040281	SAMN07255690	SRS2306393	2017-06-26	2017-06-22	75541	75541	75541	75541	75541	75541	75541	2	2	2	2	2	2	2
SAL_KA0550AA	PNUSAS016040	PHE	SRR5742172;ILLUMINA;Paired;;SRX2947118;312057456;244	SAL_KA0550AA	ND	ND						North America	United States							Typhimurium (Predicted)				Center for Diease Control and Prevention - Enteric Diseases Laboratory Branch (US)			PRJNA230403	SRP040281	SAMN07255695	SRS2306391	2017-06-26	2017-06-22	61852	61852	271	271	269	269	269	2	2	2	2	2	2	2
SAL_KA0644AA	2015AM-2125	PHE	SRR5755660;ILLUMINA;Paired;;SRX2955840;746053056;246	SAL_KA0644AA	ND	ND						North America	United States							Typhimurium (Predicted)				Center for Diease Control and Prevention - Enteric Diseases Laboratory Branch (US)			PRJNA230403	SRP040281	SAMN07277736	SRS2313071	2017-06-26	2017-06-26	76271	76271	52028	271	269	269	269	2	2	2	2	2	2	2
SAL_KA1821AA	PNUSAS016207	PHE	SRR5787067;ILLUMINA;Paired;;SRX2973486;660006000;222	SAL_KA1821AA								North America	United States							Typhimurium (Predicted)				Center for Diease Control and Prevention - Enteric Diseases Laboratory Branch (US)			PRJNA230403	SRP040281	SAMN07260218	SRS2328495	2017-07-02	2017-06-30	76745	76745	76745	76745	76745	76745	3610	2	2	2	2	2	2	2
SAL_KA1984AA	PNUSAS015638	PHE	SRR5799613;ILLUMINA;Paired;;SRX2979080;210165840;243	SAL_KA1984AA								North America	United States							Typhimurium (Predicted)				Center for Diease Control and Prevention - Enteric Diseases Laboratory Branch (US)			PRJNA230403	SRP040281	SAMN07287221	SRS2332975	2017-07-03	2017-07-03	76858	61852	271	271	269	269	269	2	2	2	2	2	2	2
SAL_KA2021AA	PNUSAS014363	PHE	SRR5799576;ILLUMINA;Paired;;SRX2979043;422925462;243	SAL_KA2021AA	ND	ND	Bovine stool	2017				North America	United States	Wisconsin						Typhimurium (Predicted)				Center for Diease Control and Prevention - Enteric Diseases Laboratory Branch (US)			PRJNA230403	SRP040281	SAMN07279528	SRS2332936	2017-07-03	2017-07-03	68864	68864	271	271	269	269	269	2	2	2	2	2	2	2
SAL_KA2022AA	PNUSAS016696	PHE	SRR5799575;ILLUMINA;Paired;;SRX2979042;277822080;240	SAL_KA2022AA								North America	United States							Typhimurium (Predicted)				Center for Diease Control and Prevention - Enteric Diseases Laboratory Branch (US)			PRJNA230403	SRP040281	SAMN07281445	SRS2332935	2017-07-03	2017-07-03	76835	76835	52307	6	2	2	2	2	2	2	2	2	2	2
SAL_KA2400AA	FSIS1702508	PHE	SRR5815874;ILLUMINA;Paired;500;SRX2994291;703955076;246	SAL_KA2400AA	Livestock	Bovine	animal-cattle-beef cow	2017				North America	United States	Tennessee						Typhimurium	I			Department of Agriculture - Food Safety and Inspection Service (US)			PRJNA292666	SRP062916	SAMN07340353	SRS2345834	2017-07-11	2017-07-10	77809	77809	70987	271	269	269	269	2	2	2	2	2	2	2
SAL_KA2418AA	PNUSAS014601	PHE	SRR5815686;ILLUMINA;Paired;;SRX2994124;969427976;239	SAL_KA2418AA	ND	ND						North America	United States							Typhimurium (Predicted)				Center for Diease Control and Prevention - Enteric Diseases Laboratory Branch (US)			PRJNA230403	SRP040281	SAMN07298791	SRS2345667	2017-07-11	2017-07-10	61852	61852	271	271	269	269	269	2	2	2	2	2	2	2
SAL_KA2560AA	PNUSAS017402	PHE	SRR5812347;ILLUMINA;Paired;;SRX2990842;292551164;229	SAL_KA2560AA								North America	United States							Typhimurium (Predicted)				Center for Diease Control and Prevention - Enteric Diseases Laboratory Branch (US)			PRJNA230403	SRP040281	SAMN07322524	SRS2342825	2017-07-11	2017-07-07	77639	77639	77639	271	269	269	269	2	2	2	2	2	2	2
SAL_KA2580AA	PNUSAS017000	PHE	SRR5812320;ILLUMINA;Paired;;SRX2990815;158789840;220	SAL_KA2580AA	ND	ND						North America	United States							Typhimurium (Predicted)				Center for Diease Control and Prevention - Enteric Diseases Laboratory Branch (US)			PRJNA230403	SRP040281	SAMN07315469	SRS2342798	2017-07-11	2017-07-07	77585	61852	271	271	269	269	269	2	2	2	2	2	2	2
SAL_KA2670AA	PNUSAS016121	PHE	SRR5812167;ILLUMINA;Paired;;SRX2990677;452823360;240	SAL_KA2670AA								North America	United States							Typhimurium (Predicted)				Center for Diease Control and Prevention - Enteric Diseases Laboratory Branch (US)			PRJNA230403	SRP040281	SAMN07258826	SRS2342660	2017-07-11	2017-07-07	77497	77497	77497	77497	77497	77497	3610	2	2	2	2	2	2	2
SAL_KA2812AA	DTU2016_1426_PRJproj1048_Salmonella_typhimurium_F14_707_1	PHE	ERR2023577;ILLUMINA;Paired;244;ERX2082732;453720900;150	SAL_KA2812AA	Livestock	Swine	Sus scrofa domesticus; Pigs	2014				Europe	Denmark					56.2639	9.50178	Typhimurium				Technical University of Denmark - Centre for Genomic Epidemiology	National Food Institute			PRJEB21631	ERP023903	SAMEA104151269	ERS1810287	2017-07-11	2017-07-06	77312	77312	77312	30476	2	2	2	2	2	2	2	2	2	2
SAL_KA2832AA	DTU2016_1406_PRJproj1048_Salmonella_typhimurium_F14_225_1	PHE	ERR2023557;ILLUMINA;Paired;243;ERX2082712;356272500;150	SAL_KA2832AA	Livestock	Swine	Sus scrofa domesticus; Pigs	2014				Europe	Denmark					56.2639	9.50178	Typhimurium				Technical University of Denmark - Centre for Genomic Epidemiology	National Food Institute			PRJEB21631	ERP023903	SAMEA104151249	ERS1810267	2017-07-11	2017-07-06	77326	77326	77326	77326	77326	2	2	2	2	2	2	2	2	2
SAL_KA2852AA	DTU2016_1386_PRJproj1048_Salmonella_monofasisk_F14_1530_1	PHE	ERR2023537;ILLUMINA;Paired;243;ERX2082692;419182800;150	SAL_KA2852AA	Livestock	Swine	Sus scrofa domesticus; Pigs	2014				Europe	Germany					51.1657	10.4515	Typhimurium monophasic				Technical University of Denmark - Centre for Genomic Epidemiology	National Food Institute			PRJEB21631	ERP023903	SAMEA104151229	ERS1810247	2017-07-11	2017-07-06	77345	77345	77345	77345	29153	2	2	2	2	2	2	2	2	2
SAL_KA2856AA	DTU2016_1382_PRJproj1048_Salmonella_monofasisk_F14_1329_1	PHE	ERR2023533;ILLUMINA;Paired;227;ERX2082688;521579100;150	SAL_KA2856AA	Livestock	Swine	Sus scrofa domesticus; Pigs	2014				Europe	Denmark					56.2639	9.50178	Typhimurium monophasic				Technical University of Denmark - Centre for Genomic Epidemiology	National Food Institute			PRJEB21631	ERP023903	SAMEA104151225	ERS1810243	2017-07-11	2017-07-06	77348	77348	77348	77348	77326	2	2	2	2	2	2	2	2	2
SAL_KA2861AA	DTU2016_1377_PRJproj1048_Salmonella_monofasisk_F14_1107_1	PHE	ERR2023528;ILLUMINA;Paired;228;ERX2082683;573405600;150	SAL_KA2861AA	Livestock	Swine	Sus scrofa domesticus; Pigs	2014				Europe	Denmark					56.2639	9.50178	Monophasic Variant Of S. Typhimurium				Technical University of Denmark - Centre for Genomic Epidemiology	National Food Institute			PRJEB21631	ERP023903	SAMEA104151220	ERS1810238	2017-07-11	2017-07-06	77350	77350	77350	77350	77350	77350	2	2	2	2	2	2	2	2
SAL_KA2876AA	DTU2016_1362_PRJproj1048_Salmonella_typhimurium_2014_60_453_1	PHE	ERR2023513;ILLUMINA;Paired;236;ERX2082668;397431300;150	SAL_KA2876AA	Livestock	Swine	Sus scrofa domesticus; Pigs	2014				Europe	Denmark					56.2639	9.50178	Typhimurium				Technical University of Denmark - Centre for Genomic Epidemiology	National Food Institute			PRJEB21631	ERP023903	SAMEA104151205	ERS1810223	2017-07-11	2017-07-06	77286	77286	77286	30476	2	2	2	2	2	2	2	2	2	2
SAL_KA3200AA	PNUSAS017391	PHE	SRR5822045;ILLUMINA;Paired;;SRX2999895;314317920;240	SAL_KA3200AA								North America	United States							Typhimurium (Predicted)				Center for Diease Control and Prevention - Enteric Diseases Laboratory Branch (US)			PRJNA230403	SRP040281	SAMN07342340	SRS2350740	2017-07-13	2017-07-13	78171	78171	36034	271	269	269	269	2	2	2	2	2	2	2
SAL_KA3255AA	PNUSAS017581	PHE	SRR5821947;ILLUMINA;Paired;;SRX2999797;454879680;240	SAL_KA3255AA								North America	United States							Typhimurium (Predicted)				Center for Diease Control and Prevention - Enteric Diseases Laboratory Branch (US)			PRJNA230403	SRP040281	SAMN07333431	SRS2350643	2017-07-13	2017-07-13	78271	78271	78271	271	269	269	269	2	2	2	2	2	2	2
SAL_KA3823AA	MC_07-0020	PHE	traces-0sJVHZR;ILLUMINA;Paired;;;1523069050;151	SAL_KA3823AA	Human	Human	Faeces	2007				Europe	Ireland							Typhimurium	I			M. Achtman	U302	M. Cormican (NSRL	Galway)					2017-07-20	2018-10-09	78526	78526	78526	78526	78526	78526	2	2	2	2	2	2	2	2
SAL_KA3843AA	JM_06/02	PHE	traces-0yQeZLI;ILLUMINA;Paired;;;1578330822;151	SAL_KA3843AA		Human	Faeces	2006				Europe	United Kingdom	Northern Ireland						Typhimurium	I			M. Achtman	DT7	J. Moore (Belfast City Hospital)					2017-07-20	2018-10-09	78569	78569	78569	78569	78569	2	2	2	2	2	2	2	2	2
SAL_KA3921AA	MEXSALSLHS02-12	PHE	traces-0IwTjwW;ILLUMINA;Paired;;;1736410608;151	SAL_KA3921AA	Human	Human		2002				North America	Mexico							Typhimurium	I			M. Achtman		M. Zaidi (Mexico)					2017-07-20	2018-10-09	79411	79411	79411	79411	79411	3610	3610	2	2	2	2	2	2	2
SAL_KA3927AA	MEXSALYURES03-7	PHE	traces-0mAkkoV;ILLUMINA;Paired;;;1537910840;151	SAL_KA3927AA	Livestock	Bovine		2003				North America	Mexico							Typhimurium	I			M. Achtman		M. Zaidi (Mexico)					2017-07-20	2018-10-09	79405	79405	79146	79146	79146	3610	3610	2	2	2	2	2	2	2
SAL_KA3929AA	MEXSALMIPUS03-27	PHE	ERR3482056;ILLUMINA;Paired;;ERX3503591;1678686026;151	SAL_KA3929AA		Swine	Pig	2003				North America	Mexico							Typhimurium	I			M. Achtman		M. Zaidi (Mexico)	PRJEB34027	ERP116872	SAMEA5867066	ERS3655558	2017-07-20	2018-10-09	79290	79290	79290	79290	79290	3610	3610	2	2	2	2	2	2	2
SAL_KA4083AA	MEXSALMIRES04-4	PHE	traces-0szEabL;ILLUMINA;Paired;;;1784758392;151	SAL_KA4083AA	Livestock	Bovine		2004				North America	Mexico							Typhimurium	I			M. Achtman		M. Zaidi (Mexico)					2017-07-20	2018-10-09	79177	79177	79177	79177	79177	79177	79177	2	2	2	2	2	2	2
SAL_KA4109AA	MEXSALYUHS03-25	PHE	traces-0rTIrmh;ILLUMINA;Paired;;;1522820806;151	SAL_KA4109AA	Human	Human		2003				North America	Mexico							Typhimurium	I			M. Achtman		M. Zaidi (Mexico)					2017-07-20	2018-10-09	79146	79146	79146	79146	79146	3610	3610	2	2	2	2	2	2	2
SAL_KA4112AA	MEXSALYUHS05-26	PHE	traces-0PRlTbn;ILLUMINA;Paired;;;1662103508;151	SAL_KA4112AA	Human	Human		2005				North America	Mexico							Typhimurium	I			M. Achtman		M. Zaidi (Mexico)					2017-07-20	2018-10-09	79149	79149	79149	79149	79149	3610	3610	2	2	2	2	2	2	2
SAL_KA4117AA	MC_08-0885	PHE	traces-0yCbhIX;ILLUMINA;Paired;;;1515493380;151	SAL_KA4117AA	Human	Human	Faeces	2008				Europe	Ireland							Typhimurium	I			M. Achtman	DT193	M. Cormican (NSRL	Galway)					2017-07-20	2018-10-09	79105	79105	1471	1471	1471	269	269	2	2	2	2	2	2	2
SAL_KA4118AA	05-03202	PHE	traces-0BJwHIn;ILLUMINA;Paired;;;1693065454;151	SAL_KA4118AA	Human	Human		2005				Europe	Germany							Typhimurium monophasic	I		4	5:i:-	M. Achtman	DT193	W. Rabsch (Robert Koch-Institut	Wernigerode)					2017-07-20	2018-10-09	79106	79106	79106	6	2	2	2	2	2	2	2	2	2	2
SAL_KA4409AA	02-02704	PHE	traces-0ukIEMv;ILLUMINA;Paired;;;1153550910;151	SAL_KA4409AA	Livestock	Swine		2002				Europe	Germany							Typhimurium monophasic	I		4:i:-	M. Achtman	DT097	W. Rabsch (Robert Koch-Institut	Wernigerode)					2017-07-20	2018-10-09	78865	78865	78865	78865	78865	2	2	2	2	2	2	2	2	2
SAL_KA4411AA	01-02361	PHE	traces-0FDYxWH;ILLUMINA;Paired;;;1347135024;151	SAL_KA4411AA	Human	Human		2001				Europe	Germany							Typhimurium monophasic	I		4:i:-	M. Achtman	DT007	W. Rabsch (Robert Koch-Institut	Wernigerode)					2017-07-20	2018-10-09	78867	78867	78867	78867	78867	2	2	2	2	2	2	2	2	2
SAL_KA4471AA	MEXSALSLHS03-9	PHE	traces-0dqRniZ;ILLUMINA;Paired;;;1072070404;151	SAL_KA4471AA	Human	Human	ND	2003				North America	Mexico							Typhimurium	I			M. Achtman		M. Zaidi (Mexico)					2017-07-20	2018-10-09	78504	78504	78504	78504	78493	3610	3610	2	2	2	2	2	2	2
SAL_KA4474AA	MC_07-0262	PHE	traces-0fVckWg;ILLUMINA;Paired;;;1303197950;151	SAL_KA4474AA	Human	Human	Faeces	2007				Europe	Ireland							Typhimurium	I			M. Achtman		M. Cormican (NSRL	Galway)					2017-07-20	2018-10-09	78415	78415	78415	78415	78415	269	269	2	2	2	2	2	2	2
SAL_KA4484AA	MEXSALMIHS05-11A	PHE	traces-0YCPsDV;ILLUMINA;Paired;;;1346938724;151	SAL_KA4484AA	Human	Human	ND	2005				North America	Mexico							Typhimurium	I			M. Achtman		M. Zaidi (Mexico)					2017-07-20	2018-10-09	78499	78499	78499	78499	78499	3610	3610	2	2	2	2	2	2	2
SAL_KA4489AA	MEXSALYUHS04-36	PHE	ERR3482042;ILLUMINA;Paired;;ERX3503577;1367329462;151	SAL_KA4489AA	Human	Human		2004				North America	Mexico							Typhimurium	I			M. Achtman		M. Zaidi (Mexico)	PRJEB34027	ERP116872	SAMEA5867052	ERS3655544	2017-07-20	2018-10-09	78497	78497	78497	78497	5511	3610	3610	2	2	2	2	2	2	2
SAL_KA4490AA	MEXSALSLPUS03-29	PHE	traces-0WzUqpx;ILLUMINA;Paired;;;1273544268;151	SAL_KA4490AA		Swine	Pig	2003				North America	Mexico							Typhimurium	I			M. Achtman		M. Zaidi (Mexico)					2017-07-20	2018-10-09	78493	78493	78493	78493	78493	3610	3610	2	2	2	2	2	2	2
SAL_KA4491AA	MEXSALYUHS03-58A	PHE	traces-0qBtMgo;ILLUMINA;Paired;;;1395510592;151	SAL_KA4491AA	Human	Human	ND	2003				North America	Mexico							Typhimurium	I			M. Achtman		M. Zaidi (Mexico)					2017-07-20	2018-10-09	78453	78453	78453	78453	5511	3610	3610	2	2	2	2	2	2	2
SAL_KA4919AA	PNUSAS017916	PHE	SRR5854336;ILLUMINA;Paired;;SRX3023665;590677230;195	SAL_KA4919AA								North America	United States											Center for Diease Control and Prevention - Enteric Diseases Laboratory Branch (US)			PRJNA230403	SRP040281	SAMN07350046	SRS2372935	2017-07-21	2017-07-20	77639	77639	77639	271	269	269	269	2	2	2	2	2	2	2
SAL_KA4944AA	PNUSAS017923	PHE	SRR5854311;ILLUMINA;Paired;;SRX3023640;1054423128;212	SAL_KA4944AA								North America	United States											Center for Diease Control and Prevention - Enteric Diseases Laboratory Branch (US)			PRJNA230403	SRP040281	SAMN07351532	SRS2372908	2017-07-21	2017-07-20	36034	36034	36034	271	269	269	269	2	2	2	2	2	2	2
SAL_KA5392AA	PNUSAS014810	PHE	SRR5864416;ILLUMINA;Paired;;SRX3032621;228018692;242	SAL_KA5392AA								North America	United States							Typhimurium (Predicted)				Center for Diease Control and Prevention - Enteric Diseases Laboratory Branch (US)			PRJNA230403	SRP040281	SAMN07358530	SRS2381420	2017-07-25	2017-07-24	79872	69659	271	271	269	269	269	2	2	2	2	2	2	2
SAL_KA5765AA	PNUSAS014485	PHE	SRR5876908;ILLUMINA;Paired;;SRX3044410;501227532;234	SAL_KA5765AA	ND	ND						North America	United States							Typhimurium (Predicted)				Center for Diease Control and Prevention - Enteric Diseases Laboratory Branch (US)			PRJNA230403	SRP040281	SAMN07258306	SRS2392090	2017-07-28	2017-07-27	80387	80387	80387	80387	80387	80387	3610	2	2	2	2	2	2	2
SAL_KA6121AA	2015AM-1928	PHE	SRR5874811;ILLUMINA;Paired;;SRX3041842;832018040;244	SAL_KA6121AA	ND	ND						North America	United States							Typhimurium				Center for Diease Control and Prevention - Enteric Diseases Laboratory Branch (US)			PRJNA230403	SRP040281	SAMN07418964	SRS2389785	2017-07-28	2017-07-27	80114	80114	80114	23098	2	2	2	2	2	2	2	2	2	2
SAL_KA6501AA	2015AM-0183	PHE	SRR5896125;ILLUMINA;Paired;;SRX3061684;531000480;240	SAL_KA6501AA	ND	ND						North America	United States							Typhimurium (Predicted)				Center for Diease Control and Prevention - Enteric Diseases Laboratory Branch (US)			PRJNA230403	SRP040281	SAMN07449806	SRS2406855	2017-08-04	2017-08-04	81221	81221	81221	81221	81221	2	2	2	2	2	2	2	2	2
SAL_KA6881AA	PNUSAS017140	PHE	SRR5888400;ILLUMINA;Paired;;SRX3054254;536457144;146	SAL_KA6881AA								North America	United States							Typhimurium (Predicted)				Center for Diease Control and Prevention - Enteric Diseases Laboratory Branch (US)			PRJNA230403	SRP040281	SAMN07419599	SRS2400472	2017-08-04	2017-08-01	80822	80822	80822	80822	80822	3610	3610	2	2	2	2	2	2	2
SAL_KA6985AA	PNUSAS018829	PHE	SRR5887853;ILLUMINA;Paired;;SRX3053708;189688716;243	SAL_KA6985AA								North America	United States							Typhimurium (Predicted)				Center for Diease Control and Prevention - Enteric Diseases Laboratory Branch (US)			PRJNA230403	SRP040281	SAMN07407959	SRS2400046	2017-08-04	2017-08-01	68864	68864	271	271	269	269	269	2	2	2	2	2	2	2
SAL_KA7124AA	PNUSAS015222	PHE	SRR5901563;ILLUMINA;Paired;;SRX3063132;450272640;240	SAL_KA7124AA								North America	United States							Typhimurium (Predicted)				Center for Diease Control and Prevention - Enteric Diseases Laboratory Branch (US)			PRJNA230403	SRP040281	SAMN07358751	SRS2408245	2017-08-05	2017-08-04	61852	61852	271	271	269	269	269	2	2	2	2	2	2	2
SAL_KA7130AA	PNUSAS017703	PHE	SRR5901557;ILLUMINA;Paired;;SRX3063126;336479420;194	SAL_KA7130AA								North America	United States							Typhimurium (Predicted)				Center for Diease Control and Prevention - Enteric Diseases Laboratory Branch (US)			PRJNA230403	SRP040281	SAMN07346376	SRS2408234	2017-08-05	2017-08-04	82329	82329	271	271	269	269	269	2	2	2	2	2	2	2
SAL_KA7343AA	PNUSAS018964	PHE	SRR5908501;ILLUMINA;Paired;;SRX3070012;344175216;231	SAL_KA7343AA								North America	United States							Typhimurium (Predicted)				Center for Diease Control and Prevention - Enteric Diseases Laboratory Branch (US)			PRJNA230403	SRP040281	SAMN07429617	SRS2414392	2017-08-08	2017-08-07	82198	82198	271	271	269	269	269	2	2	2	2	2	2	2
SAL_KA7432AA	PNUSAS018059	PHE	SRR5908302;ILLUMINA;Paired;;SRX3069814;331587228;138	SAL_KA7432AA								North America	United States							Typhimurium (Predicted)				Center for Diease Control and Prevention - Enteric Diseases Laboratory Branch (US)			PRJNA230403	SRP040281	SAMN07442104	SRS2414176	2017-08-08	2017-08-07	82232	82232	271	271	269	269	269	2	2	2	2	2	2	2
SAL_KA7455AA	PNUSAS019908	PHE	SRR5908242;ILLUMINA;Paired;;SRX3069754;774200800;200	SAL_KA7455AA								North America	United States							Typhimurium (Predicted)				Center for Diease Control and Prevention - Enteric Diseases Laboratory Branch (US)			PRJNA230403	SRP040281	SAMN07427850	SRS2414169	2017-08-08	2017-08-07	82233	82233	82233	271	269	269	269	2	2	2	2	2	2	2
SAL_KA7469AA	PNUSAS019141	PHE	SRR5908221;ILLUMINA;Paired;;SRX3069732;159310692;193	SAL_KA7469AA	Human	Human	Homo sapiens	2015	12			North America	United States							Typhimurium (Predicted)				Center for Diease Control and Prevention - Enteric Diseases Laboratory Branch (US)			PRJNA230403	SRP040281	SAMN07427343	SRS2414117	2017-08-08	2017-08-07	92838	92838	57020	6	2	2	2	2	2	2	2	2	2	2
SAL_KA7727AA	PNUSAS020222	PHE	SRR5921524;ILLUMINA;Paired;;SRX3082330;352341864;246	SAL_KA7727AA								North America	United States							Typhimurium (Predicted)				Center for Diease Control and Prevention - Enteric Diseases Laboratory Branch (US)			PRJNA230403	SRP040281	SAMN07450755	SRS2420994	2017-08-10	2017-08-09	77639	77639	77639	271	269	269	269	2	2	2	2	2	2	2
SAL_KA7861AA	PNUSAS020107	PHE	SRR5921386;ILLUMINA;Paired;;SRX3082196;425813208;246	SAL_KA7861AA								North America	United States							Typhimurium (Predicted)				Center for Diease Control and Prevention - Enteric Diseases Laboratory Branch (US)			PRJNA230403	SRP040281	SAMN07455909	SRS2420830	2017-08-10	2017-08-09	78171	78171	36034	271	269	269	269	2	2	2	2	2	2	2
SAL_KA8035AA	PNUSAS019797	PHE	SRR5920105;ILLUMINA;Paired;;SRX3080950;315263844;238	SAL_KA8035AA								North America	United States							Typhimurium (Predicted)				Center for Diease Control and Prevention - Enteric Diseases Laboratory Branch (US)			PRJNA230403	SRP040281	SAMN07455887	SRS2419388	2017-08-10	2017-08-09	82141	82141	82141	271	269	269	269	2	2	2	2	2	2	2
SAL_KA8256AA	PNUSAS017759	PHE	SRR5929615;ILLUMINA;Paired;;SRX3089899;863102208;192	SAL_KA8256AA								North America	United States							Typhimurium (Predicted)				Center for Diease Control and Prevention - Enteric Diseases Laboratory Branch (US)			PRJNA230403	SRP040281	SAMN07460634	SRS2427589	2017-08-12	2017-08-11	81602	81602	271	271	269	269	269	2	2	2	2	2	2	2
SAL_KA8393AA	2015AM-2140	PHE	SRR5934062;ILLUMINA;Paired;;SRX3094205;683143476;246	SAL_KA8393AA								North America	United States							Typhimurium (Predicted)				Center for Diease Control and Prevention - Enteric Diseases Laboratory Branch (US)			PRJNA230403	SRP040281	SAMN07508295	SRS2431526	2017-08-15	2017-08-15	6225	6225	271	271	269	269	269	2	2	2	2	2	2	2
SAL_KA8809AA	17026508	PHE	traces-0GwaCZI;ILLUMINA;Paired;;NA;262219212;146	SAL_KA8809AA	Human			2017				Europe	Luxembourg							Typhimurium				Laboratoire National de SantÔøΩ							2017-08-17	2018-02-19	81329	81329	81329	1891	1891	269	269	2	2	2	2	2	2	2
SAL_KA8883AA	17031278	PHE	traces-0udZWey;ILLUMINA;Paired;;NA;309750168;147	SAL_KA8883AA	Human			2017				Europe	Luxembourg							Typhimurium				Laboratoire National de SantÔøΩ							2017-08-17	2018-02-19	81373	81373	81373	81373	28058	2	2	2	2	2	2	2	2	2
SAL_KA8912AA	PNUSAS017162	PHE	SRR5938182;ILLUMINA;Paired;;SRX3098080;315529640;236	SAL_KA8912AA								North America	United States							Typhimurium (Predicted)				Center for Diease Control and Prevention - Enteric Diseases Laboratory Branch (US)			PRJNA230403	SRP040281	SAMN07500765	SRS2434411	2017-08-17	2017-08-16	59471	59471	59471	59471	269	269	269	2	2	2	2	2	2	2
SAL_KA8979AA	2015AM-0315	PHE	SRR5944092;ILLUMINA;Paired;;SRX3102588;777847374;243	SAL_KA8979AA								North America	United States							Typhimurium (Predicted)				Center for Diease Control and Prevention - Enteric Diseases Laboratory Branch (US)			PRJNA230403	SRP040281	SAMN07516129	SRS2438308	2017-08-18	2017-08-18	51046	51046	271	271	269	269	269	2	2	2	2	2	2	2
SAL_KA9192AA	17036350	PHE	traces-0shjDsK;ILLUMINA;Paired;;NA;449559810;147	SAL_KA9192AA	Human			2017				Europe	Luxembourg							Typhimurium				Laboratoire National de SantÔøΩ							2017-08-21	2018-02-23	82459	82459	82459	82459	82459	82459	2	2	2	2	2	2	2	2
SAL_KA9548AA	PNUSAS019670	PHE	SRR5948495;ILLUMINA;Paired;;SRX3107256;464864064;224	SAL_KA9548AA								North America	United States							Typhimurium (Predicted)				Center for Diease Control and Prevention - Enteric Diseases Laboratory Branch (US)			PRJNA230403	SRP040281	SAMN07513363	SRS2442507	2017-08-22	2017-08-21	82198	82198	271	271	269	269	269	2	2	2	2	2	2	2
SAL_KA9691AA	PNUSAS020662	PHE	SRR5947780;ILLUMINA;Paired;;SRX3106548;478445130;243	SAL_KA9691AA				2017				North America	United States							Typhimurium (Predicted)				Center for Diease Control and Prevention - Enteric Diseases Laboratory Branch (US)			PRJNA230403	SRP040281	SAMN07504990	SRS2441800	2017-08-22	2017-08-21	74543	74543	271	271	269	269	269	2	2	2	2	2	2	2
SAL_KA9980AA	PNUSAS020405	PHE	SRR5955264;ILLUMINA;Paired;;SRX3113638;554586116;239	SAL_KA9980AA								North America	United States							Typhimurium (Predicted)				Center for Diease Control and Prevention - Enteric Diseases Laboratory Branch (US)			PRJNA230403	SRP040281	SAMN07519543	SRS2448661	2017-08-23	2017-08-22	82198	82198	271	271	269	269	269	2	2	2	2	2	2	2
SAL_LA0003AA	FSIS1703655	PHE	SRR5955209;ILLUMINA;Paired;500;SRX3113583;675521320;244	SAL_LA0003AA	Livestock	Swine	Product-Raw-Ground	Comminuted or Otherwise Nonintact-Pork	2017				North America	United States	Texas						Typhimurium monophasic	I		I 4	[5]	12:I:-	Department of Agriculture - Food Safety and Inspection Service (US)			PRJNA242847	SRP040648	SAMN07519840	SRS2448605	2017-08-23	2017-08-22	83245	83245	83245	6	2	2	2	2	2	2	2	2	2	2
SAL_LA0102AA	19-29-20170725	PHE	traces-0PhVivV;ILLUMINA;Paired;;NA;379269376;248	SAL_LA0102AA								Europe	United Kingdom	Scotland						Typhimurium (Predicted)				D. Brown (Scotland)							2017-08-24	2018-02-26	82848	82848	82848	82848	1471	269	269	2	2	2	2	2	2	2
SAL_LA1178AA	PNUSAS020730	PHE	SRR5995927;ILLUMINA;Paired;;SRX3151567;414101580;233	SAL_LA1178AA								North America	United States							Typhimurium (Predicted)				Center for Diease Control and Prevention - Enteric Diseases Laboratory Branch (US)			PRJNA230403	SRP040281	SAMN07567557	SRS2483445	2017-09-01	2017-08-31	82198	82198	271	271	269	269	269	2	2	2	2	2	2	2
SAL_LA1310AA	30919	PHE	SRR5991558;ILLUMINA;Paired;500;SRX3147229;520218704;232	SAL_LA1310AA	Wild animal	Swine	Intestine (Porcine)	2015				North America	United States	Minnesota						Typhimurium (Predicted)				Food and Drug Administration - Center for Food Safety and Applied Nutrition (US)			PRJNA215333	SRP032981	SAMN07420439	SRS2479184	2017-09-01	2017-08-31	74853	74853	74853	59471	269	269	269	2	2	2	2	2	2	2
SAL_LA1799AA	FDA00000428	PHE	SRR6010020;ILLUMINA;Paired;500;SRX3163945;404235660;186	SAL_LA1799AA	Environment	Plant	fresh cilantro	2005	6			North America	Mexico							Typhimurium	I			Food and Drug Administration - Center for Food Safety and Applied Nutrition (US)			PRJNA186035	SRP018785	SAMN02843813	SRS2493940	2017-09-06	2017-09-06	85595	85595	85595	85595	85595	85595	3610	2	2	2	2	2	2	2
SAL_LA1841AA	FSIS1703753	PHE	SRR6007332;ILLUMINA;Paired;300;SRX3161797;423220800;150	SAL_LA1841AA	Livestock	Swine	animal-swine-market swine	2017				North America	United States	Iowa						I 4	[5]	12:I:-	I			Department of Agriculture - Food Safety and Inspection Service (US)			PRJNA292666	SRP062916	SAMN07605911	SRS2492888	2017-09-06	2017-09-05	84865	84865	84865	6	2	2	2	2	2	2	2	2	2	2
SAL_LA1857AA	0408R5931	PHE	traces-0fFrtbx;ILLUMINA;Paired;;;319869642;151	SAL_LA1857AA	Human	Human		2004				Europe	Denmark							Typhimurium				M. Achtman	208	M. Torpdahl (SSI	Denmark)					2017-09-07	2018-10-09	86047	86047	86047	84985	84985	2	2	2	2	2	2	2	2	2
SAL_LA1860AA	MEXSALYUHS04-31	PHE	traces-0hHWOEt;ILLUMINA;Paired;;;326623872;151	SAL_LA1860AA	Human	Human		2004				North America	Mexico							Typhimurium	I			M. Achtman		M. Zaidi (Mexico)					2017-09-07	2018-10-09	78497	78497	78497	78497	5511	3610	3610	2	2	2	2	2	2	2
SAL_LA1872AA	MEXSALYUHS03-26	PHE	traces-0pgnjVw;ILLUMINA;Paired;;;358742478;151	SAL_LA1872AA	Human	Human		2003				North America	Mexico							Typhimurium	I			M. Achtman		M. Zaidi (Mexico)					2017-09-07	2018-10-09	85761	85761	85761	85761	5511	3610	3610	2	2	2	2	2	2	2
SAL_LA1883AA	MEXSALYUHS03-72	PHE	traces-0TKFBwd;ILLUMINA;Paired;;;361928578;151	SAL_LA1883AA	Human	Human		2003				North America	Mexico							Typhimurium	I			M. Achtman		M. Zaidi (Mexico)					2017-09-07	2018-10-09	86011	86011	86011	86011	5511	3610	3610	2	2	2	2	2	2	2
SAL_LA1895AA	MEXSALYUHS02-75	PHE	ERR3482104;ILLUMINA;Paired;;ERX3503639;373629568;151	SAL_LA1895AA	Human	Human		2002				North America	Mexico							Typhimurium	I			M. Achtman		M. Zaidi (Mexico)	PRJEB34027	ERP116872	SAMEA5867114	ERS3655606	2017-09-07	2018-10-09	86025	86025	86025	41342	5511	3610	3610	2	2	2	2	2	2	2
SAL_LA1905AA	0412R6192	PHE	traces-0RgkbqG;ILLUMINA;Paired;;;349081800;151	SAL_LA1905AA	Human	Human		2004				Europe	Denmark							Typhimurium				M. Achtman	120	M. Torpdahl (SSI	Denmark)					2017-09-07	2018-10-09	85979	85979	85979	85979	85979	39339	269	2	2	2	2	2	2	2
SAL_LA1908AA	MEXSALYUHS04-62	PHE	traces-0osUdny;ILLUMINA;Paired;;;372197182;151	SAL_LA1908AA	Human	Human		2004				North America	Mexico							Typhimurium	I			M. Achtman		M. Zaidi (Mexico)					2017-09-07	2018-10-09	86032	86032	86032	86032	5511	3610	3610	2	2	2	2	2	2	2
SAL_LA1949AA	0405M70905	PHE	traces-0LBSkqr;ILLUMINA;Paired;;;347509286;151	SAL_LA1949AA	Human	Human		2004				Europe	Denmark							Typhimurium				M. Achtman	non	M. Torpdahl (SSI	Denmark)					2017-09-07	2018-10-09	86235	86235	86235	86235	21377	2	2	2	2	2	2	2	2	2
SAL_LA2023AA	0312R5526	PHE	traces-0fzoKwy;ILLUMINA;Paired;;;281357696;151	SAL_LA2023AA	Human	Human		2003				Europe	Denmark							Typhimurium				M. Achtman	120	M. Torpdahl (SSI	Denmark)					2017-09-07	2018-10-09	85861	85861	85861	85861	85861	2	2	2	2	2	2	2	2	2
SAL_LA2042AA	P535793/0	PHE	traces-0Ahugqu;ILLUMINA;Paired;;;325379028;151	SAL_LA2042AA	Human	Human		2001				Europe	United Kingdom							Typhimurium	I			M. Achtman	120	J. Wain (HPA	Colindale)					2017-09-07	2018-10-09	85873	85873	85873	39693	39693	2	2	2	2	2	2	2	2	2
SAL_LA2063AA	MEXSALSORES04-45	PHE	traces-0kHtpck;ILLUMINA;Paired;;;314414012;151	SAL_LA2063AA	Livestock	Bovine		2004				North America	Mexico							Typhimurium	I			M. Achtman		M. Zaidi (Mexico)					2017-09-07	2018-10-09	85703	85703	85703	85703	85703	3610	3610	2	2	2	2	2	2	2
SAL_LA2067AA	H041640345	PHE	traces-0oIADXm;ILLUMINA;Paired;;;347641562;151	SAL_LA2067AA	Human	Human		2004				Europe	United Kingdom							Typhimurium	I			M. Achtman	193	J. Wain (HPA	Colindale)					2017-09-07	2018-10-09	85845	85845	85845	85845	5511	3610	3610	2	2	2	2	2	2	2
SAL_LA2079AA	0308R5294	PHE	traces-0ljgSoU;ILLUMINA;Paired;;;299429980;151	SAL_LA2079AA	Human	Human		2003				Europe	Denmark							Typhimurium				M. Achtman	U302	M. Torpdahl (SSI	Denmark)					2017-09-07	2018-10-09	86282	86282	86282	84985	84985	2	2	2	2	2	2	2	2	2
SAL_LA2102AA	0408H34482	PHE	traces-0NBKMyh;ILLUMINA;Paired;;;300531978;151	SAL_LA2102AA	Human	Human		2004				Europe	Denmark							Typhimurium				M. Achtman	RDNC	M. Torpdahl (SSI	Denmark)					2017-09-07	2018-10-09	85775	85775	85775	85775	85775	85775	269	2	2	2	2	2	2	2
SAL_LA2185AA	PNUSAS020148	PHE	SRR6014490;ILLUMINA;Paired;;SRX3167487;599595740;230	SAL_LA2185AA								North America	United States							Typhimurium (Predicted)				Center for Diease Control and Prevention - Enteric Diseases Laboratory Branch (US)			PRJNA230403	SRP040281	SAMN07567548	SRS2497649	2017-09-07	2017-09-07	85770	85770	85770	271	269	269	269	2	2	2	2	2	2	2
SAL_LA2187AA	PNUSAS021592	PHE	SRR6014488;ILLUMINA;Paired;;SRX3167485;153342784;224	SAL_LA2187AA								North America	United States							Typhimurium (Predicted)				Center for Diease Control and Prevention - Enteric Diseases Laboratory Branch (US)			PRJNA230403	SRP040281	SAMN07569146	SRS2497647	2017-09-07	2017-09-07	82198	82198	271	271	269	269	269	2	2	2	2	2	2	2
SAL_LA2194AA	PNUSAS020147	PHE	SRR6014481;ILLUMINA;Paired;;SRX3167478;482007560;235	SAL_LA2194AA								North America	United States							Typhimurium (Predicted)				Center for Diease Control and Prevention - Enteric Diseases Laboratory Branch (US)			PRJNA230403	SRP040281	SAMN07567547	SRS2497640	2017-09-07	2017-09-07	85710	85710	271	271	269	269	269	2	2	2	2	2	2	2
SAL_LA2203AA	PNUSAS021329	PHE	SRR6014472;ILLUMINA;Paired;;SRX3167469;400156680;217	SAL_LA2203AA								North America	United States							Typhimurium (Predicted)				Center for Diease Control and Prevention - Enteric Diseases Laboratory Branch (US)			PRJNA230403	SRP040281	SAMN07569143	SRS2497631	2017-09-07	2017-09-07	82198	82198	271	271	269	269	269	2	2	2	2	2	2	2
SAL_LA2377AA	MEXSALYUHSO3-84	PHE	traces-0qiFOJK;ILLUMINA;Paired;;;288873872;151	SAL_LA2377AA	Human	Human		2003				North America	Mexico							Typhimurium	I			M. Achtman		M. Zaidi (Mexico)					2017-09-08	2018-10-09	85181	85181	85181	85181	5511	3610	3610	2	2	2	2	2	2	2
SAL_LA2379AA	MEXSALYUHS04-15	PHE	traces-0ZdeNgK;ILLUMINA;Paired;;;306258804;151	SAL_LA2379AA	Human	Human		2004				North America	Mexico							Typhimurium	I			M. Achtman		M. Zaidi (Mexico)					2017-09-08	2018-10-09	85035	85035	85035	85035	5511	3610	3610	2	2	2	2	2	2	2
SAL_LA2393AA	MEXSALMIHS02-19	PHE	traces-0qDxoNR;ILLUMINA;Paired;;;344415296;151	SAL_LA2393AA	Human	Human		2002				North America	Mexico							Typhimurium	I			M. Achtman		M. Zaidi (Mexico)					2017-09-08	2018-10-09	85274	85274	85274	85274	85274	3610	3610	2	2	2	2	2	2	2
SAL_LA2409AA	MEXSALSLHS03-10	PHE	traces-0xIayHN;ILLUMINA;Paired;;;335249898;151	SAL_LA2409AA	Human	Human		2003				North America	Mexico							Typhimurium	I			M. Achtman		M. Zaidi (Mexico)					2017-09-08	2018-10-09	78504	78504	78504	78504	78493	3610	3610	2	2	2	2	2	2	2
SAL_LA2413AA	0206R4425	PHE	traces-0DHpeSF;ILLUMINA;Paired;;;339363138;151	SAL_LA2413AA	Human	Human		2002				Europe	Denmark							Typhimurium				M. Achtman	120	M. Torpdahl (SSI	Denmark)					2017-09-08	2018-10-09	85316	85316	85316	85316	85316	85316	2	2	2	2	2	2	2	2
SAL_LA2428AA	MEXSALYUHS04-23	PHE	traces-0SEtCNl;ILLUMINA;Paired;;;332258286;151	SAL_LA2428AA	Human	Human		2004				North America	Mexico							Typhimurium	I			M. Achtman		M. Zaidi (Mexico)					2017-09-08	2018-10-09	85025	85025	85025	85025	85025	3610	3610	2	2	2	2	2	2	2
SAL_LA2430AA	MEXSALYUHS03-19	PHE	traces-0ZYXDcP;ILLUMINA;Paired;;;370278878;151	SAL_LA2430AA	Human	Human		2003				North America	Mexico							Typhimurium	I			M. Achtman		M. Zaidi (Mexico)					2017-09-08	2018-10-09	86251	86251	86251	86251	86251	3610	3610	2	2	2	2	2	2	2
SAL_LA2439AA	MEXSALYUHS03-34	PHE	traces-0rRpSuX;ILLUMINA;Paired;;;320146274;151	SAL_LA2439AA	Human	Human		2003				North America	Mexico							Typhimurium	I			M. Achtman		M. Zaidi (Mexico)					2017-09-08	2018-10-09	41342	41342	41342	41342	5511	3610	3610	2	2	2	2	2	2	2
SAL_LA2443AA	MEXSALSLHS03-15	PHE	traces-0UilHfr;ILLUMINA;Paired;;;283168186;151	SAL_LA2443AA	Human	Human		2003				North America	Mexico							Typhimurium	I			M. Achtman		M. Zaidi (Mexico)					2017-09-08	2018-10-09	85196	85196	85196	85196	85196	85196	85196	2	2	2	2	2	2	2
SAL_LA2454AA	H2545	PHE	traces-0dtJssv;ILLUMINA;Paired;;;320611052;151	SAL_LA2454AA				2001				Africa	South Africa							Typhimurium	I			M. Achtman		L. Harrison (Univ of Pittsburgh)					2017-09-08	2018-10-09	86238	86238	86238	86238	86238	269	269	2	2	2	2	2	2	2
SAL_LA2458AA	MEXSALSOHS04-19	PHE	traces-0Uuwhbw;ILLUMINA;Paired;;;281604430;151	SAL_LA2458AA	Human	Human		2004				North America	Mexico							Typhimurium	I			M. Achtman		M. Zaidi (Mexico)					2017-09-08	2018-10-09	86239	86239	86239	86239	85703	3610	3610	2	2	2	2	2	2	2
SAL_LA2520AA	1090900006	PHE	traces-0wSclTb;ILLUMINA;Paired;;;324654530;151	SAL_LA2520AA	Human	Human		2009				Europe	Netherlands							Typhimurium	I			M. Achtman	Dutch 507	X. Huijsden (RIVM)					2017-09-08	2018-10-09	85161	85161	85161	85161	85161	2	2	2	2	2	2	2	2	2
SAL_LA2532AA	1090800775	PHE	traces-0MyTVMI;ILLUMINA;Paired;;;302606718;151	SAL_LA2532AA	Human	Human		2008				Europe	Netherlands							Typhimurium	I			M. Achtman	Dutch 507	X. Huijsden (RIVM)					2017-09-08	2018-10-09	84985	84985	84985	84985	84985	2	2	2	2	2	2	2	2	2
SAL_LA2741AA	0810R10830	PHE	traces-0UKvCYc;ILLUMINA;Paired;;;297424096;151	SAL_LA2741AA	Human	Human		2008				Europe	Denmark							Typhimurium				M. Achtman	RDNC	M. Torpdahl (SSI	Denmark)					2017-09-08	2018-10-09	85364	85364	85364	85364	85364	35745	269	2	2	2	2	2	2	2
SAL_LA2859AA	0905R11598	PHE	traces-0CaJTcR;ILLUMINA;Paired;;;277004668;151	SAL_LA2859AA	Human	Human		2009				Europe	Denmark							Typhimurium				M. Achtman	120	M. Torpdahl (SSI	Denmark)					2017-09-08	2018-10-09	85381	85381	85381	39339	39339	39339	269	2	2	2	2	2	2	2
SAL_LA2865AA	0702T54856	PHE	traces-0qteKcj;ILLUMINA;Paired;;;303272628;151	SAL_LA2865AA	Human	Human		2007				Europe	Denmark							Typhimurium				M. Achtman	RDNC	M. Torpdahl (SSI	Denmark)					2017-09-08	2018-10-09	85187	85187	85187	85187	85187	2	2	2	2	2	2	2	2	2
SAL_LA2867AA	0901R11202	PHE	traces-0eTopji;ILLUMINA;Paired;;;300790792;151	SAL_LA2867AA	Human	Human		2009				Europe	Denmark							Typhimurium				M. Achtman	120	M. Torpdahl (SSI	Denmark)					2017-09-08	2018-10-09	85384	85384	85384	85052	39339	39339	269	2	2	2	2	2	2	2
SAL_LA2880AA	0707R8328	PHE	traces-0xoEIRH;ILLUMINA;Paired;;;282838704;151	SAL_LA2880AA	Human	Human		2007				Europe	Denmark							Typhimurium				M. Achtman	RDNC	M. Torpdahl (SSI	Denmark)					2017-09-08	2018-10-09	85049	85049	85049	29153	29153	2	2	2	2	2	2	2	2	2
SAL_LA2881AA	0704M52877	PHE	traces-0AdiqWl;ILLUMINA;Paired;;;285837866;151	SAL_LA2881AA	Human	Human		2007				Europe	Denmark							Typhimurium				M. Achtman	120	M. Torpdahl (SSI	Denmark)					2017-09-08	2018-10-09	85050	85050	85050	85050	1471	269	269	2	2	2	2	2	2	2
SAL_LA2886AA	0901S6733	PHE	traces-0YlCRIV;ILLUMINA;Paired;;;304907052;151	SAL_LA2886AA	Human	Human		2009				Europe	Denmark							Typhimurium				M. Achtman	193	M. Torpdahl (SSI	Denmark)					2017-09-08	2018-10-09	85052	85052	85052	85052	39339	39339	269	2	2	2	2	2	2	2
SAL_LA2919AA	0812T47655	PHE	traces-0KPHbnf;ILLUMINA;Paired;;;295672194;151	SAL_LA2919AA	Human	Human		2008				Europe	Denmark							Typhimurium				M. Achtman	120	M. Torpdahl (SSI	Denmark)					2017-09-08	2018-10-09	85054	85054	85054	39339	39339	39339	269	2	2	2	2	2	2	2
SAL_LA2945AA	0801R9095	PHE	traces-0TCfzjJ;ILLUMINA;Paired;;;339200360;151	SAL_LA2945AA	Human	Human		2008				Europe	Denmark							Typhimurium				M. Achtman	RDNC	M. Torpdahl (SSI	Denmark)					2017-09-08	2018-10-09	85419	85419	85419	85419	35697	269	269	2	2	2	2	2	2	2
SAL_LA2964AA	0705T1228	PHE	traces-0wSeXKP;ILLUMINA;Paired;;;322182962;151	SAL_LA2964AA	Human	Human		2007				Europe	Denmark							O:4	5	12; H:i:-				M. Achtman	120	M. Torpdahl (SSI	Denmark)					2017-09-08	2018-10-09	85429	85429	85429	29153	29153	2	2	2	2	2	2	2	2	2
SAL_LA2975AA	0911R12354	PHE	traces-0XbcZvT;ILLUMINA;Paired;;;297254372;151	SAL_LA2975AA	Human	Human		2009				Europe	Denmark							Typhimurium				M. Achtman	120	M. Torpdahl (SSI	Denmark)					2017-09-08	2018-10-09	84949	84949	84949	84949	84949	84949	2	2	2	2	2	2	2	2
SAL_LA2980AA	0805R9425	PHE	traces-0Urfmmv;ILLUMINA;Paired;;;297370038;151	SAL_LA2980AA	Human	Human		2008				Europe	Denmark							Typhimurium				M. Achtman	U312	M. Torpdahl (SSI	Denmark)					2017-09-08	2018-10-09	85436	85436	85436	85052	39339	39339	269	2	2	2	2	2	2	2
SAL_LA3013AA	0904H7139	PHE	traces-0KXXJAV;ILLUMINA;Paired;;;279935276;151	SAL_LA3013AA	Human	Human		2009				Europe	Denmark							Typhimurium				M. Achtman	U312	M. Torpdahl (SSI	Denmark)					2017-09-08	2018-10-09	85455	85455	85054	39339	39339	39339	269	2	2	2	2	2	2	2
SAL_LA3025AA	0909F35227	PHE	traces-0oHkfcc;ILLUMINA;Paired;;;274521624;151	SAL_LA3025AA	Human	Human		2009				Europe	Denmark							Typhimurium				M. Achtman	120	M. Torpdahl (SSI	Denmark)					2017-09-08	2018-10-09	85463	85463	85463	85463	7386	2	2	2	2	2	2	2	2	2
SAL_LA3035AA	0803R9221	PHE	traces-0GvJQOc;ILLUMINA;Paired;;;295604546;151	SAL_LA3035AA	Human	Human		2008				Europe	Denmark							Typhimurium				M. Achtman	120	M. Torpdahl (SSI	Denmark)					2017-09-08	2018-10-09	85492	85492	85492	85492	57489	269	269	2	2	2	2	2	2	2
SAL_LA3037AA	0807R9876	PHE	traces-0cCxdwp;ILLUMINA;Paired;;;309051398;151	SAL_LA3037AA	Human	Human		2008				Europe	Denmark							Typhimurium				M. Achtman	120	M. Torpdahl (SSI	Denmark)					2017-09-08	2018-10-09	85471	85471	85471	29153	29153	2	2	2	2	2	2	2	2	2
SAL_LA4116AA	PNUSAS022337	PHE	SRR6039100;ILLUMINA;Paired;;SRX3187284;551881136;232	SAL_LA4116AA	ND	ND						North America	United States											Center for Diease Control and Prevention - Enteric Diseases Laboratory Branch (US)			PRJNA230403	SRP040281	SAMN07605600	SRS2515078	2017-09-14	2017-09-14	87412	87412	87412	6	2	2	2	2	2	2	2	2	2	2
SAL_LA4497AA	PNUSAS022265	PHE	SRR6050786;ILLUMINA;Paired;;SRX3197764;939425760;234	SAL_LA4497AA								North America	United States											Center for Diease Control and Prevention - Enteric Diseases Laboratory Branch (US)			PRJNA230403	SRP040281	SAMN07647607	SRS2524844	2017-09-19	2017-09-19	86943	86943	86943	86943	86943	269	269	2	2	2	2	2	2	2
SAL_LA4513AA	PNUSAS022085	PHE	SRR6050769;ILLUMINA;Paired;;SRX3197736;604709874;243	SAL_LA4513AA								North America	United States											Center for Diease Control and Prevention - Enteric Diseases Laboratory Branch (US)			PRJNA230403	SRP040281	SAMN07647615	SRS2524815	2017-09-19	2017-09-19	86953	86953	86953	86953	86953	49543	3610	2	2	2	2	2	2	2
SAL_LA4537AA	PNUSAS022442	PHE	SRR6050745;ILLUMINA;Paired;;SRX3197712;184280160;240	SAL_LA4537AA								North America	United States											Center for Diease Control and Prevention - Enteric Diseases Laboratory Branch (US)			PRJNA230403	SRP040281	SAMN07625251	SRS2524790	2017-09-19	2017-09-19	86934	86934	86934	86934	86934	70813	3610	2	2	2	2	2	2	2
SAL_LA4763AA	PNUSAS021880	PHE	SRR6053836;ILLUMINA;Paired;;SRX3200774;640133008;232	SAL_LA4763AA								North America	United States											Center for Diease Control and Prevention - Enteric Diseases Laboratory Branch (US)			PRJNA230403	SRP040281	SAMN07652460	SRS2527746	2017-09-20	2017-09-20	87272	87272	87272	87272	58564	2	2	2	2	2	2	2	2	2
SAL_LA5154AA	109255	PHE	SRR6062459;ILLUMINA;Paired;;SRX3207552;688799664;98	SAL_LA5154AA	Human	Human	human; Homo sapiens	2015	5			Europe	United Kingdom							Typhimurium	I			Public Health England			PRJNA248792	SRP042645	SAMN07690430	SRS2533066	2017-09-25	2017-09-24	88082	88082	88082	88082	88082	88082	2	2	2	2	2	2	2	2
SAL_LA5170AA	18586	PHE	SRR6062440;ILLUMINA;Paired;;SRX3207536;507351904;97	SAL_LA5170AA	Human	Human	human; Homo sapiens	2014	6			Europe	United Kingdom							Typhimurium	I			Public Health England			PRJNA248792	SRP042645	SAMN07690410	SRS2533049	2017-09-25	2017-09-24	88072	88072	88072	88072	2	2	2	2	2	2	2	2	2	2
SAL_LA5184AA	143539	PHE	SRR6062426;ILLUMINA;Paired;;SRX3207521;298428424;98	SAL_LA5184AA	Human	Human	human; Homo sapiens	2015	8			Europe	United Kingdom							Typhimurium	I			Public Health England			PRJNA248792	SRP042645	SAMN07690398	SRS2533034	2017-09-25	2017-09-24	88055	88055	88055	88055	27077	2	2	2	2	2	2	2	2	2
SAL_LA5187AA	163228	PHE	SRR6062423;ILLUMINA;Paired;;SRX3207518;314807680;97	SAL_LA5187AA	Human	Human	human; Homo sapiens	2015	9			Europe	United Kingdom							Typhimurium	I			Public Health England			PRJNA248792	SRP042645	SAMN07690390	SRS2533031	2017-09-25	2017-09-24	88056	88056	1679	1679	1471	269	269	2	2	2	2	2	2	2
SAL_LA5190AA	152377	PHE	SRR6062420;ILLUMINA;Paired;;SRX3207515;338678410;97	SAL_LA5190AA	Human	Human	human; Homo sapiens	2015	8			Europe	United Kingdom							Typhimurium	I			Public Health England			PRJNA248792	SRP042645	SAMN07690383	SRS2533028	2017-09-25	2017-09-24	88061	88061	88061	88061	88061	269	269	2	2	2	2	2	2	2
SAL_LA5191AA	178843	PHE	SRR6062419;ILLUMINA;Paired;;SRX3207514;364692240;99	SAL_LA5191AA	Human	Human	human; Homo sapiens	2015	10			Europe	United Kingdom							Typhimurium	I			Public Health England			PRJNA248792	SRP042645	SAMN07690388	SRS2533027	2017-09-25	2017-09-24	88076	88076	1954	1891	1891	269	269	2	2	2	2	2	2	2
SAL_LA5217AA	238705	PHE	SRR6062393;ILLUMINA;Paired;;SRX3207488;220366080;96	SAL_LA5217AA	Human	Human	human; Homo sapiens	2016	3			Europe	United Kingdom							Typhimurium	I			Public Health England			PRJNA248792	SRP042645	SAMN07690374	SRS2533001	2017-09-25	2017-09-24	88096	88096	88096	88096	2	2	2	2	2	2	2	2	2	2
SAL_LA5255AA	130394	PHE	SRR6062355;ILLUMINA;Paired;;SRX3207450;411727752;97	SAL_LA5255AA	Human	Human	human; Homo sapiens	2015	6			Europe	United Kingdom							Typhimurium	I			Public Health England			PRJNA248792	SRP042645	SAMN07690327	SRS2532963	2017-09-25	2017-09-24	88321	88321	88321	88321	2	2	2	2	2	2	2	2	2	2
SAL_LA5288AA	171288	PHE	SRR6062322;ILLUMINA;Paired;;SRX3207417;337913800;98	SAL_LA5288AA	Human	Human	human; Homo sapiens	2015	10			Europe	United Kingdom							Typhimurium	I			Public Health England			PRJNA248792	SRP042645	SAMN07690297	SRS2532930	2017-09-25	2017-09-24	1679	1679	1679	1679	1471	269	269	2	2	2	2	2	2	2
SAL_LA5338AA	142154	PHE	SRR6062267;ILLUMINA;Paired;;SRX3207363;286400664;99	SAL_LA5338AA	Human	Human	human; Homo sapiens	2015	7			Europe	United Kingdom							Typhimurium	I			Public Health England			PRJNA248792	SRP042645	SAMN07690247	SRS2532880	2017-09-25	2017-09-24	87504	87504	87504	87504	87504	87504	87504	2	2	2	2	2	2	2
SAL_LA5340AA	158953	PHE	SRR6062265;ILLUMINA;Paired;;SRX3207361;309132572;98	SAL_LA5340AA	Human	Human	human; Homo sapiens	2015	9			Europe	United Kingdom							Typhimurium	I			Public Health England			PRJNA248792	SRP042645	SAMN07690246	SRS2532878	2017-09-25	2017-09-24	87499	87499	87499	87499	87499	2	2	2	2	2	2	2	2	2
SAL_LA5362AA	161060	PHE	SRR6074725;ILLUMINA;Paired;;SRX3215317;538776218;97	SAL_LA5362AA	Human	Human	human; Homo sapiens	2015	9			Europe	United Kingdom							Typhimurium - Monophasic	I			Public Health England			PRJNA248792	SRP042645	SAMN07695502	SRS2540450	2017-09-26	2017-09-26	88288	88288	88288	88288	88288	88288	2	2	2	2	2	2	2	2
SAL_LA5418AA	179834	PHE	SRR6074669;ILLUMINA;Paired;;SRX3215261;319635820;98	SAL_LA5418AA	Human	Human	human; Homo sapiens	2015	10			Europe	United Kingdom							Typhimurium	I			Public Health England			PRJNA248792	SRP042645	SAMN07695420	SRS2540393	2017-09-26	2017-09-26	88248	1870	1870	1870	1870	2	2	2	2	2	2	2	2	2
SAL_LA5447AA	152381	PHE	SRR6074640;ILLUMINA;Paired;;SRX3215232;324422902;97	SAL_LA5447AA	Human	Human	human; Homo sapiens	2015	8			Europe	United Kingdom							Typhimurium	I			Public Health England			PRJNA248792	SRP042645	SAMN07695404	SRS2540365	2017-09-26	2017-09-26	88236	88236	88236	88189	393	269	269	2	2	2	2	2	2	2
SAL_LA5461AA	192867	PHE	SRR6074626;ILLUMINA;Paired;;SRX3215218;239597820;99	SAL_LA5461AA	Human	Human	human; Homo sapiens	2015	11			Europe	United Kingdom							Typhimurium	I			Public Health England			PRJNA248792	SRP042645	SAMN07695377	SRS2540352	2017-09-26	2017-09-26	1375	1375	1375	1375	1375	2	2	2	2	2	2	2	2	2
SAL_LA5476AA	180808	PHE	SRR6074611;ILLUMINA;Paired;;SRX3215203;337042776;98	SAL_LA5476AA	Human	Human	human; Homo sapiens	2015	10			Europe	United Kingdom							Typhimurium	I			Public Health England			PRJNA248792	SRP042645	SAMN07695366	SRS2540336	2017-09-26	2017-09-26	88189	88189	88189	88189	393	269	269	2	2	2	2	2	2	2
SAL_LA5541AA	236280	PHE	SRR6074539;ILLUMINA;Paired;;SRX3215131;312816392;98	SAL_LA5541AA	Human	Human	human; Homo sapiens	2016	3			Europe	United Kingdom							Typhimurium	I			Public Health England			PRJNA248792	SRP042645	SAMN07695310	SRS2540263	2017-09-26	2017-09-26	88150	88150	88150	1499	1499	269	269	2	2	2	2	2	2	2
SAL_LA5553AA	152388	PHE	SRR6074527;ILLUMINA;Paired;;SRX3215119;301082956;97	SAL_LA5553AA	Human	Human	human; Homo sapiens	2015	8			Europe	United Kingdom							Typhimurium	I			Public Health England			PRJNA248792	SRP042645	SAMN07695282	SRS2540252	2017-09-26	2017-09-26	88126	88126	1954	1891	1891	269	269	2	2	2	2	2	2	2
SAL_LA5559AA	245476	PHE	SRR6074505;ILLUMINA;Paired;;SRX3215097;288201340;98	SAL_LA5559AA	Human	Human	human; Homo sapiens	2016	4			Europe	United Kingdom							Typhimurium	I			Public Health England			PRJNA248792	SRP042645	SAMN07695276	SRS2540233	2017-09-26	2017-09-26	88129	88129	88129	88129	88129	2	2	2	2	2	2	2	2	2
SAL_LA5564AA	235129	PHE	SRR6074500;ILLUMINA;Paired;;SRX3215092;219012948;98	SAL_LA5564AA	Human	Human	human; Homo sapiens	2016	3			Europe	United Kingdom							Typhimurium - Monophasic	I			Public Health England			PRJNA248792	SRP042645	SAMN07695274	SRS2540225	2017-09-26	2017-09-26	88114	88114	88114	88114	88114	2	2	2	2	2	2	2	2	2
SAL_LA5566AA	246193	PHE	SRR6074498;ILLUMINA;Paired;;SRX3215090;242921616;98	SAL_LA5566AA	Human	Human	human; Homo sapiens	2016	4			Europe	United Kingdom							Typhimurium - Monophasic	I			Public Health England			PRJNA248792	SRP042645	SAMN07695269	SRS2540223	2017-09-26	2017-09-26	88115	88115	88115	88115	88115	2	2	2	2	2	2	2	2	2
SAL_LA5574AA	175570	PHE	SRR6074490;ILLUMINA;Paired;;SRX3215082;214707220;98	SAL_LA5574AA	Human	Human	human; Homo sapiens	2015	10			Europe	United Kingdom							Typhimurium - Monophasic	I			Public Health England			PRJNA248792	SRP042645	SAMN07695261	SRS2540216	2017-09-26	2017-09-26	88153	88153	88153	88153	88153	2	2	2	2	2	2	2	2	2
SAL_LA5626AA	20-19-20170795	PHE	traces-0BBtqJN;ILLUMINA;Paired;;NA;89189072;238	SAL_LA5626AA								Europe	United Kingdom	Scotland						(I)4	5	12:i:-				D. Brown (Scotland)							2017-09-27	2018-04-01	87596	87596	87596	87596	2	2	2	2	2	2	2	2	2	2
SAL_LA6367AA	PNUSAS023567	PHE	SRR6107973;ILLUMINA;Paired;;SRX3222852;405479116;223	SAL_LA6367AA								North America	United States											Center for Diease Control and Prevention - Enteric Diseases Laboratory Branch (US)			PRJNA230403	SRP040281	SAMN07689227	SRS2547448	2017-09-28	2017-09-27	61852	61852	271	271	269	269	269	2	2	2	2	2	2	2
SAL_LA6389AA	PNUSAS023568	PHE	SRR6107948;ILLUMINA;Paired;;SRX3222827;281690660;230	SAL_LA6389AA								North America	United States											Center for Diease Control and Prevention - Enteric Diseases Laboratory Branch (US)			PRJNA230403	SRP040281	SAMN07689228	SRS2547426	2017-09-28	2017-09-27	88725	88725	88725	271	269	269	269	2	2	2	2	2	2	2
SAL_LA6401AA	PNUSAS023563	PHE	SRR6107936;ILLUMINA;Paired;;SRX3222814;260799312;204	SAL_LA6401AA								North America	United States											Center for Diease Control and Prevention - Enteric Diseases Laboratory Branch (US)			PRJNA230403	SRP040281	SAMN07672062	SRS2547411	2017-09-28	2017-09-27	61852	61852	271	271	269	269	269	2	2	2	2	2	2	2
SAL_LA6424AA	PNUSAS023269	PHE	SRR6107913;ILLUMINA;Paired;;SRX3222791;398676800;200	SAL_LA6424AA								North America	United States											Center for Diease Control and Prevention - Enteric Diseases Laboratory Branch (US)			PRJNA230403	SRP040281	SAMN07672061	SRS2547390	2017-09-28	2017-09-27	88725	88725	88725	271	269	269	269	2	2	2	2	2	2	2
SAL_LA6495AA	PNUSAS023328	PHE	SRR6107636;ILLUMINA;Paired;;SRX3222633;509006550;195	SAL_LA6495AA								North America	United States											Center for Diease Control and Prevention - Enteric Diseases Laboratory Branch (US)			PRJNA230403	SRP040281	SAMN07665599	SRS2547232	2017-09-28	2017-09-27	88639	88639	88639	88639	88639	88639	2	2	2	2	2	2	2	2
SAL_LA6550AA	PNUSAS023625	PHE	SRR6107580;ILLUMINA;Paired;;SRX3222577;574342400;172	SAL_LA6550AA	Human	Human	ND					North America	United States											Center for Diease Control and Prevention - Enteric Diseases Laboratory Branch (US)			PRJNA230403	SRP040281	SAMN07662730	SRS2547176	2017-09-28	2017-09-27	59471	59471	59471	59471	269	269	269	2	2	2	2	2	2	2
SAL_LA6640AA	PNUSAS021651	PHE	SRR6107409;ILLUMINA;Paired;;SRX3222442;595535220;147	SAL_LA6640AA								North America	United States											Center for Diease Control and Prevention - Enteric Diseases Laboratory Branch (US)			PRJNA230403	SRP040281	SAMN07687832	SRS2547039	2017-09-28	2017-09-27	88569	88569	36034	271	269	269	269	2	2	2	2	2	2	2
SAL_LA6923AA	21-1-20170717	PHE	traces-0UvfhEK;ILLUMINA;Paired;;NA;416732492;253	SAL_LA6923AA								Europe	United Kingdom	Scotland						(I)4	5	12:i:-				D. Brown (Scotland)							2017-09-29	2018-04-03	87989	87989	87989	87989	2	2	2	2	2	2	2	2	2	2
SAL_LA6925AA	21-2-20170718	PHE	traces-0GhYREw;ILLUMINA;Paired;;NA;383714528;248	SAL_LA6925AA								Europe	United Kingdom	Scotland						(I)4	5	12:i:-				D. Brown (Scotland)							2017-09-29	2018-04-03	87993	87993	87989	87989	2	2	2	2	2	2	2	2	2	2
SAL_LA7204AA	128176	PHE	SRR6116968;ILLUMINA;Paired;;SRX3229704;353388980;98	SAL_LA7204AA	Human	Human	human; Homo sapiens	2015	6			Europe	United Kingdom							Typhimurium	I			Public Health England			PRJNA248792	SRP042645	SAMN07717998	SRS2554264	2017-09-29	2017-09-29	90431	27268	27268	27268	26656	2	2	2	2	2	2	2	2	2
SAL_LA7206AA	173747	PHE	SRR6116966;ILLUMINA;Paired;;SRX3229702;481348952;98	SAL_LA7206AA	Human	Human	human; Homo sapiens	2015	9			Europe	United Kingdom							Typhimurium	I			Public Health England			PRJNA248792	SRP042645	SAMN07718009	SRS2554262	2017-09-29	2017-09-29	90432	90432	1679	1679	1471	269	269	2	2	2	2	2	2	2
SAL_LA7220AA	149221	PHE	SRR6116952;ILLUMINA;Paired;;SRX3229688;240422760;90	SAL_LA7220AA	Human	Human	human; Homo sapiens	2015	8			Europe	United Kingdom							Typhimurium	I			Public Health England			PRJNA248792	SRP042645	SAMN07717976	SRS2554247	2017-09-29	2017-09-29	90202	90202	90202	90202	29380	2	2	2	2	2	2	2	2	2
SAL_LA7238AA	146186	PHE	SRR6116934;ILLUMINA;Paired;;SRX3229670;358479492;98	SAL_LA7238AA	Human	Human	human; Homo sapiens	2015	8			Europe	United Kingdom							Typhimurium	I			Public Health England			PRJNA248792	SRP042645	SAMN07717993	SRS2554230	2017-09-29	2017-09-29	90213	90213	90213	1891	1891	269	269	2	2	2	2	2	2	2
SAL_LA7266AA	208773	PHE	SRR6116906;ILLUMINA;Paired;;SRX3229642;418886496;98	SAL_LA7266AA	Human	Human	human; Homo sapiens	2016	1			Europe	United Kingdom							Typhimurium	I			Public Health England			PRJNA248792	SRP042645	SAMN07717954	SRS2554203	2017-09-29	2017-09-29	90263	90263	90263	90263	90263	2	2	2	2	2	2	2	2	2
SAL_LA7290AA	149312	PHE	SRR6116804;ILLUMINA;Paired;;SRX3229540;268863660;89	SAL_LA7290AA	Human	Human	human; Homo sapiens	2015	8			Europe	United Kingdom							Typhimurium	I			Public Health England			PRJNA248792	SRP042645	SAMN07717922	SRS2554104	2017-09-29	2017-09-29	1659	1659	1659	1659	1659	2	2	2	2	2	2	2	2	2
SAL_LA7360AA	PNUSAS024162	PHE	SRR6116068;ILLUMINA;Paired;;SRX3228829;318904322;209	SAL_LA7360AA								North America	United States											Center for Diease Control and Prevention - Enteric Diseases Laboratory Branch (US)			PRJNA230403	SRP040281	SAMN07689225	SRS2553397	2017-09-29	2017-09-28	90103	90103	28417	271	269	269	269	2	2	2	2	2	2	2
SAL_LA7385AA	PNUSAS023385	PHE	SRR6116033;ILLUMINA;Paired;;SRX3228794;646847208;236	SAL_LA7385AA								North America	United States											Center for Diease Control and Prevention - Enteric Diseases Laboratory Branch (US)			PRJNA230403	SRP040281	SAMN07688336	SRS2553362	2017-09-29	2017-09-28	90156	90156	90156	90156	90156	90156	3610	2	2	2	2	2	2	2
SAL_LA7528AA	157338	PHE	SRR6114108;ILLUMINA;Paired;;SRX3228488;284266640;98	SAL_LA7528AA	Human	Human	human; Homo sapiens	2015	9			Europe	United Kingdom							Typhimurium	I			Public Health England			PRJNA248792	SRP042645	SAMN07716025	SRS2553052	2017-09-29	2017-09-29	89939	89939	1870	1870	1870	2	2	2	2	2	2	2	2	2
SAL_LA7557AA	180807	PHE	SRR6114075;ILLUMINA;Paired;;SRX3228455;339613296;97	SAL_LA7557AA	Human	Human	human; Homo sapiens	2015	10			Europe	United Kingdom							Typhimurium	I			Public Health England			PRJNA248792	SRP042645	SAMN07716047	SRS2553021	2017-09-29	2017-09-29	88189	88189	88189	88189	393	269	269	2	2	2	2	2	2	2
SAL_LA7566AA	174776	PHE	SRR6114064;ILLUMINA;Paired;;SRX3228444;330044596;98	SAL_LA7566AA	Human	Human	human; Homo sapiens	2015	10			Europe	United Kingdom							Typhimurium - Monophasic	I			Public Health England			PRJNA248792	SRP042645	SAMN07716020	SRS2553013	2017-09-29	2017-09-29	89904	89904	89904	27185	27185	2	2	2	2	2	2	2	2	2
SAL_LA7636AA	153165	PHE	SRR6111304;ILLUMINA;Paired;;SRX3226137;270008424;98	SAL_LA7636AA	Human	Human	human; Homo sapiens	2015	8			Europe	United Kingdom							Typhimurium	I			Public Health England			PRJNA248792	SRP042645	SAMN07714661	SRS2550745	2017-09-29	2017-09-29	2049	2049	2049	2049	1471	269	269	2	2	2	2	2	2	2
SAL_LA7654AA	173710	PHE	SRR6111286;ILLUMINA;Paired;;SRX3226119;355105360;97	SAL_LA7654AA	Human	Human	human; Homo sapiens	2015	9			Europe	United Kingdom							Typhimurium	I			Public Health England			PRJNA248792	SRP042645	SAMN07714642	SRS2550728	2017-09-29	2017-09-29	2049	2049	2049	2049	1471	269	269	2	2	2	2	2	2	2
SAL_LA7664AA	176386	PHE	SRR6111249;ILLUMINA;Paired;;SRX3226083;298941944;98	SAL_LA7664AA	Human	Human	human; Homo sapiens	2015	10			Europe	United Kingdom							Typhimurium - Monophasic	I			Public Health England			PRJNA248792	SRP042645	SAMN07714624	SRS2550692	2017-09-29	2017-09-29	88153	88153	88153	88153	88153	2	2	2	2	2	2	2	2	2
SAL_LA7710AA	189241	PHE	SRR6111201;ILLUMINA;Paired;;SRX3226036;233574768;98	SAL_LA7710AA	Human	Human	human; Homo sapiens	2015	11			Europe	United Kingdom							Typhimurium	I			Public Health England			PRJNA248792	SRP042645	SAMN07714597	SRS2550645	2017-09-29	2017-09-29	89852	1471	1471	1471	1471	269	269	2	2	2	2	2	2	2
SAL_LA7714AA	189239	PHE	SRR6111197;ILLUMINA;Paired;;SRX3226032;203398412;98	SAL_LA7714AA	Human	Human	human; Homo sapiens	2015	11			Europe	United Kingdom							Typhimurium	I			Public Health England			PRJNA248792	SRP042645	SAMN07714559	SRS2550641	2017-09-29	2017-09-29	73556	73556	21427	21427	1891	269	269	2	2	2	2	2	2	2
SAL_LA7722AA	160791	PHE	SRR6111189;ILLUMINA;Paired;;SRX3226023;131347832;98	SAL_LA7722AA	Human	Human	human; Homo sapiens	2015	9			Europe	United Kingdom							Typhimurium - Monophasic	I			Public Health England			PRJNA248792	SRP042645	SAMN07714553	SRS2550632	2017-09-29	2017-09-29	89808	89808	89808	89808	2	2	2	2	2	2	2	2	2	2
SAL_LA7738AA	140693	PHE	SRR6111103;ILLUMINA;Paired;;SRX3225955;449560662;97	SAL_LA7738AA	Human	Human	human; Homo sapiens	2015	7			Europe	United Kingdom							Typhimurium	I			Public Health England			PRJNA248792	SRP042645	SAMN07714497	SRS2550571	2017-09-29	2017-09-29	87504	87504	87504	87504	87504	87504	87504	2	2	2	2	2	2	2
SAL_LA7769AA	176382	PHE	SRR6111066;ILLUMINA;Paired;;SRX3225918;272142276;98	SAL_LA7769AA	Human	Human	human; Homo sapiens	2015	10			Europe	United Kingdom							Typhimurium	I			Public Health England			PRJNA248792	SRP042645	SAMN07714437	SRS2550534	2017-09-29	2017-09-29	89806	89806	1954	1891	1891	269	269	2	2	2	2	2	2	2
SAL_LA7784AA	232723	PHE	SRR6111051;ILLUMINA;Paired;;SRX3225903;320022206;97	SAL_LA7784AA	Human	Human	human; Homo sapiens	2016	3			Europe	United Kingdom							Typhimurium	I			Public Health England			PRJNA248792	SRP042645	SAMN07714425	SRS2550519	2017-09-29	2017-09-29	89823	89823	25563	24998	2	2	2	2	2	2	2	2	2	2
SAL_LA7816AA	183638	PHE	SRR6111016;ILLUMINA;Paired;;SRX3225871;344200230;99	SAL_LA7816AA	Human	Human	human; Homo sapiens	2015	11			Europe	United Kingdom							Typhimurium	I			Public Health England			PRJNA248792	SRP042645	SAMN07714410	SRS2550487	2017-09-29	2017-09-29	88248	1870	1870	1870	1870	2	2	2	2	2	2	2	2	2
SAL_LA7827AA	190599	PHE	SRR6111004;ILLUMINA;Paired;;SRX3225860;343238728;98	SAL_LA7827AA	Human	Human	human; Homo sapiens	2015	11			Europe	United Kingdom							Typhimurium	I			Public Health England			PRJNA248792	SRP042645	SAMN07714386	SRS2550476	2017-09-29	2017-09-29	89792	89792	89792	89792	89792	269	269	2	2	2	2	2	2	2
SAL_LA7846AA	178740	PHE	SRR6110985;ILLUMINA;Paired;;SRX3225840;295683248;98	SAL_LA7846AA	Human	Human	human; Homo sapiens	2015	10			Europe	United Kingdom							Typhimurium - Monophasic	I			Public Health England			PRJNA248792	SRP042645	SAMN07714357	SRS2550455	2017-09-29	2017-09-29	88153	88153	88153	88153	88153	2	2	2	2	2	2	2	2	2
SAL_LA7917AA	248533	PHE	SRR6117850;ILLUMINA;Paired;;SRX3230536;372930572;98	SAL_LA7917AA	Human	Human	human; Homo sapiens	2016	4			Europe	United Kingdom							Typhimurium	I			Public Health England			PRJNA248792	SRP042645	SAMN07719097	SRS2555050	2017-10-01	2017-09-30	90496	90496	90496	30378	1499	269	269	2	2	2	2	2	2	2
SAL_LA7919AA	249354	PHE	SRR6117848;ILLUMINA;Paired;;SRX3230534;404674536;98	SAL_LA7919AA	Human	Human	human; Homo sapiens	2016	4			Europe	United Kingdom							Typhimurium	I			Public Health England			PRJNA248792	SRP042645	SAMN07719088	SRS2555048	2017-10-01	2017-09-30	90497	90497	90497	90497	90497	269	269	2	2	2	2	2	2	2
SAL_LA7926AA	253436	PHE	SRR6117841;ILLUMINA;Paired;;SRX3230527;360143532;98	SAL_LA7926AA	Human	Human	human; Homo sapiens	2016	5			Europe	United Kingdom							Typhimurium - Monophasic	I			Public Health England			PRJNA248792	SRP042645	SAMN07719094	SRS2555042	2017-10-01	2017-09-30	90502	90502	90502	90502	2	2	2	2	2	2	2	2	2	2
SAL_LA7933AA	252415	PHE	SRR6117834;ILLUMINA;Paired;;SRX3230520;492981216;91	SAL_LA7933AA	Human	Human	human; Homo sapiens	2016	5			Europe	United Kingdom							Typhimurium	I			Public Health England			PRJNA248792	SRP042645	SAMN07719085	SRS2555035	2017-10-01	2017-09-30	26656	26656	26656	26656	26656	2	2	2	2	2	2	2	2	2
SAL_LA7947AA	245529	PHE	SRR6117820;ILLUMINA;Paired;;SRX3230506;314063148;98	SAL_LA7947AA	Human	Human	human; Homo sapiens	2016	4			Europe	United Kingdom							Typhimurium	I			Public Health England			PRJNA248792	SRP042645	SAMN07719067	SRS2555021	2017-10-01	2017-09-30	90533	90533	90426	90426	90426	269	269	2	2	2	2	2	2	2
SAL_LA7962AA	251865	PHE	SRR6117805;ILLUMINA;Paired;;SRX3230491;340449378;93	SAL_LA7962AA	Human	Human	human; Homo sapiens	2016	5			Europe	United Kingdom							Typhimurium	I			Public Health England			PRJNA248792	SRP042645	SAMN07719047	SRS2555007	2017-10-01	2017-09-30	90426	90426	90426	90426	90426	269	269	2	2	2	2	2	2	2
SAL_LA7977AA	252419	PHE	SRR6117790;ILLUMINA;Paired;;SRX3230476;219194304;93	SAL_LA7977AA	Human	Human	human; Homo sapiens	2016	5			Europe	United Kingdom							Typhimurium	I			Public Health England			PRJNA248792	SRP042645	SAMN07719041	SRS2554991	2017-10-01	2017-09-30	90426	90426	90426	90426	90426	269	269	2	2	2	2	2	2	2
SAL_LA7979AA	245078	PHE	SRR6117788;ILLUMINA;Paired;;SRX3230474;218393406;99	SAL_LA7979AA	Human	Human	human; Homo sapiens	2016	4			Europe	United Kingdom							Typhimurium - Monophasic	I			Public Health England			PRJNA248792	SRP042645	SAMN07719031	SRS2554988	2017-10-01	2017-09-30	90481	90481	90481	90481	2	2	2	2	2	2	2	2	2	2
SAL_LA7984AA	242418	PHE	SRR6117783;ILLUMINA;Paired;;SRX3230469;259946960;98	SAL_LA7984AA	Human	Human	human; Homo sapiens	2016	4			Europe	United Kingdom							Typhimurium	I			Public Health England			PRJNA248792	SRP042645	SAMN07719036	SRS2554983	2017-10-01	2017-09-30	90485	90485	90485	1891	1891	269	269	2	2	2	2	2	2	2
SAL_LA8019AA	238723	PHE	SRR6117744;ILLUMINA;Paired;;SRX3230430;165122112;96	SAL_LA8019AA	Human	Human	human; Homo sapiens	2016	3			Europe	United Kingdom							Typhimurium	I			Public Health England			PRJNA248792	SRP042645	SAMN07719004	SRS2554945	2017-10-01	2017-09-30	90447	90447	90447	2033	1471	269	269	2	2	2	2	2	2	2
SAL_LA8031AA	253872	PHE	SRR6117638;ILLUMINA;Paired;;SRX3230364;243637996;98	SAL_LA8031AA	Human	Human	human; Homo sapiens	2016	5			Europe	United Kingdom							Typhimurium	I			Public Health England			PRJNA248792	SRP042645	SAMN07718988	SRS2554880	2017-10-01	2017-09-30	90426	90426	90426	90426	90426	269	269	2	2	2	2	2	2	2
SAL_LA8037AA	113071	PHE	SRR6117524;ILLUMINA;Paired;;SRX3230250;382433240;98	SAL_LA8037AA	Human	Human	human; Homo sapiens	2015	5			Europe	United Kingdom							Typhimurium	I			Public Health England			PRJNA248792	SRP042645	SAMN07718350	SRS2554763	2017-10-01	2017-09-30	89897	89897	27268	27268	26656	2	2	2	2	2	2	2	2	2
SAL_LA8048AA	178746	PHE	SRR6117513;ILLUMINA;Paired;;SRX3230239;357803880;98	SAL_LA8048AA	Human	Human	human; Homo sapiens	2015	10			Europe	United Kingdom							Typhimurium - Monophasic	I			Public Health England			PRJNA248792	SRP042645	SAMN07718327	SRS2554751	2017-10-01	2017-09-30	90453	90453	2383	307	307	2	2	2	2	2	2	2	2	2
SAL_LA8058AA	159680	PHE	SRR6117503;ILLUMINA;Paired;;SRX3230229;332054184;98	SAL_LA8058AA	Human	Human	human; Homo sapiens	2015	9			Europe	United Kingdom							Typhimurium	I			Public Health England			PRJNA248792	SRP042645	SAMN07718345	SRS2554740	2017-10-01	2017-09-30	88248	1870	1870	1870	1870	2	2	2	2	2	2	2	2	2
SAL_LA8063AA	173712	PHE	SRR6117498;ILLUMINA;Paired;;SRX3230224;416800464;97	SAL_LA8063AA	Human	Human	human; Homo sapiens	2015	9			Europe	United Kingdom							Typhimurium	I			Public Health England			PRJNA248792	SRP042645	SAMN07718336	SRS2554735	2017-10-01	2017-09-30	1535	1535	1535	1535	1535	269	269	2	2	2	2	2	2	2
SAL_LA8102AA	227072	PHE	SRR6062259;ILLUMINA;Paired;;SRX3207355;296206960;97	SAL_LA8102AA	Human	Human	human; Homo sapiens	2016	3			Europe	United Kingdom							Typhimurium	I			Public Health England			PRJNA248792	SRP042645	SAMN07690235	SRS2532872	2017-10-01	2017-09-24	90368	90368	90368	90368	90368	90368	29826	2	2	2	2	2	2	2
SAL_LA8129AA	23-6-20170906	PHE	traces-0BXCEkc;ILLUMINA;Paired;;NA;319877260;265	SAL_LA8129AA								Europe	United Kingdom	Scotland						Typhimurium				D. Brown (Scotland)							2017-10-02	2018-04-06	88101	88101	88101	1891	1891	269	269	2	2	2	2	2	2	2
SAL_LA8375AA	201708528	PHE	traces-0Esjavp;ILLUMINA;Paired;;NA;291471200;148	SAL_LA8375AA				2017				Europe	France							I.4	5	12:i:- (monophasic)	I			F.X.Weill	Institut Pasteur							2017-10-05	2018-04-09	88951	88951	88951	88951	88951	2	2	2	2	2	2	2	2	2
SAL_LA9631AA	STM177	PHE	ERR1592598;ILLUMINA;Paired;150;ERX1663084;271499580;165	SAL_LA9631AA																	I			IZSLER			PRJEB7560	ERP008476	SAMEA2822475	ERS569645	2017-10-06	2017-10-04	91222	91215	91174	91174	2	2	2	2	2	2	2	2	2	2
SAL_LA9704AA	PNUSAS024007	PHE	SRR6129510;ILLUMINA;Paired;;SRX3241945;723301516;238	SAL_LA9704AA				2015				North America	United States	Wyoming										Center for Diease Control and Prevention - Enteric Diseases Laboratory Branch (US)			PRJNA230403	SRP040281	SAMN07688504	SRS2564981	2017-10-06	2017-10-03	91190	91190	28417	271	269	269	269	2	2	2	2	2	2	2
SAL_LA9705AA	PNUSAS024009	PHE	SRR6129509;ILLUMINA;Paired;;SRX3241944;777478408;238	SAL_LA9705AA				2015				North America	United States	Wyoming										Center for Diease Control and Prevention - Enteric Diseases Laboratory Branch (US)			PRJNA230403	SRP040281	SAMN07688506	SRS2564980	2017-10-06	2017-10-03	91190	91190	28417	271	269	269	269	2	2	2	2	2	2	2
SAL_LA9932AA	24-7-20170979	PHE	traces-0JkyDkN;ILLUMINA;Paired;;NA;437374242;243	SAL_LA9932AA								Europe	United Kingdom	Scotland						(I)4	12:-:1	2				D. Brown (Scotland)							2017-10-10	2018-04-14	90558	90558	88101	1891	1891	269	269	2	2	2	2	2	2	2
SAL_LA9946AA	24-21-20171003	PHE	traces-0rqnWLm;ILLUMINA;Paired;;NA;246719902;247	SAL_LA9946AA								Europe	United Kingdom	Scotland						(I)4	12:i:-				D. Brown (Scotland)							2017-10-10	2018-04-14	90566	90566	90566	90566	6912	2	2	2	2	2	2	2	2	2
SAL_MA0146AA	PNUSAS024466	PHE	SRR6155256;ILLUMINA;Paired;;SRX3267094;318912296;188	SAL_MA0146AA	Human	Human	Homo sapiens	2015	9			North America	United States											Center for Diease Control and Prevention - Enteric Diseases Laboratory Branch (US)			PRJNA230403	SRP040281	SAMN07731354	SRS2579301	2017-10-11	2017-10-10	91958	91958	3208	271	269	269	269	2	2	2	2	2	2	2
SAL_MA0459AA	PNUSAS025033	PHE	SRR6158677;ILLUMINA;Paired;;SRX3270314;559442480;232	SAL_MA0459AA								North America	United States											Center for Diease Control and Prevention - Enteric Diseases Laboratory Branch (US)			PRJNA230403	SRP040281	SAMN07757011	SRS2582021	2017-10-12	2017-10-11	92197	92197	92197	271	269	269	269	2	2	2	2	2	2	2
SAL_MA0902AA	PNUSAS025379	PHE	SRR6169328;ILLUMINA;Paired;;SRX3280177;526338490;215	SAL_MA0902AA								North America	United States											Center for Diease Control and Prevention - Enteric Diseases Laboratory Branch (US)			PRJNA230403	SRP040281	SAMN07779391	SRS2591044	2017-10-13	2017-10-13	88725	88725	88725	271	269	269	269	2	2	2	2	2	2	2
SAL_MA0929AA	PNUSAS025323	PHE	SRR6165645;ILLUMINA;Paired;;SRX3276583;323467160;235	SAL_MA0929AA								North America	United States											Center for Diease Control and Prevention - Enteric Diseases Laboratory Branch (US)			PRJNA230403	SRP040281	SAMN07763320	SRS2587852	2017-10-13	2017-10-12	92473	92473	35905	6	2	2	2	2	2	2	2	2	2	2
SAL_MA0932AA	PNUSAS025329	PHE	SRR6165642;ILLUMINA;Paired;;SRX3276580;272352780;235	SAL_MA0932AA								North America	United States											Center for Diease Control and Prevention - Enteric Diseases Laboratory Branch (US)			PRJNA230403	SRP040281	SAMN07763328	SRS2587849	2017-10-13	2017-10-12	92475	92475	35905	6	2	2	2	2	2	2	2	2	2	2
SAL_MA1110AA	CFSAN068031	PHE	SRR6171261;ILLUMINA;Paired;500;SRX3282110;720022360;142	SAL_MA1110AA	Environment	Soil/Dust	Herd environment	2006				South America	Brazil							Typhimurium	I			Food and Drug Administration - Center for Food Safety and Applied Nutrition (US)			PRJNA186035	SRP018785	SAMN07782279	SRS2592595	2017-10-14	2017-10-13	92506	92506	92506	92506	92506	35745	269	2	2	2	2	2	2	2
SAL_MA1385AA	PNUSAS023566	PHE	SRR6183486;ILLUMINA;Paired;;SRX3293660;325103760;216	SAL_MA1385AA								North America	United States											Center for Diease Control and Prevention - Enteric Diseases Laboratory Branch (US)			PRJNA230403	SRP040281	SAMN07779388	SRS2602651	2017-10-18	2017-10-17	88725	88725	88725	271	269	269	269	2	2	2	2	2	2	2
SAL_MA1615AA	PNUSAS025868	PHE	SRR6195050;ILLUMINA;Paired;;SRX3304981;192773296;236	SAL_MA1615AA								North America	United States											Center for Diease Control and Prevention - Enteric Diseases Laboratory Branch (US)			PRJNA230403	SRP040281	SAMN07795197	SRS2611094	2017-10-20	2017-10-20	93524	93524	50759	6	2	2	2	2	2	2	2	2	2	2
SAL_MA2233AA	PNUSAS023320	PHE	SRR6195245;ILLUMINA;Paired;;SRX3305176;321103020;222	SAL_MA2233AA								North America	United States											Center for Diease Control and Prevention - Enteric Diseases Laboratory Branch (US)			PRJNA230403	SRP040281	SAMN07806988	SRS2611288	2017-10-21	2017-10-20	93601	93601	93601	93601	269	269	269	2	2	2	2	2	2	2
SAL_MA2478AA	25-15-20171032	PHE	traces-0uDOUWy;ILLUMINA;Paired;;NA;220741290;265	SAL_MA2478AA								Europe	United Kingdom	Scotland						(I)4	5	12:i:-				D. Brown (Scotland)							2017-10-23	2018-04-27	93958	93958	93958	1974	2	2	2	2	2	2	2	2	2	2
SAL_MA3381AA	PNUSAS024550	PHE	SRR6217701;ILLUMINA;Paired;;SRX3326343;290987844;238	SAL_MA3381AA								North America	United States											Center for Diease Control and Prevention - Enteric Diseases Laboratory Branch (US)			PRJNA230403	SRP040281	SAMN07720140	SRS2630094	2017-10-26	2017-10-25	94469	94469	271	271	269	269	269	2	2	2	2	2	2	2
SAL_MA3595AA	PNUSAS026671	PHE	SRR6234215;ILLUMINA;Paired;;SRX3342628;464031788;226	SAL_MA3595AA								North America	United States											Center for Diease Control and Prevention - Enteric Diseases Laboratory Branch (US)			PRJNA230403	SRP040281	SAMN07830924	SRS2643864	2017-10-30	2017-10-30	94970	94970	94970	94970	94970	94970	3610	2	2	2	2	2	2	2
SAL_MA3601AA	PNUSAS026770	PHE	SRR6234209;ILLUMINA;Paired;;SRX3342622;724419920;181	SAL_MA3601AA								North America	United States											Center for Diease Control and Prevention - Enteric Diseases Laboratory Branch (US)			PRJNA230403	SRP040281	SAMN07831560	SRS2643856	2017-10-30	2017-10-30	94973	94973	94973	271	269	269	269	2	2	2	2	2	2	2
SAL_MA3854AA	PNUSAS026619	PHE	SRR6238561;ILLUMINA;Paired;;SRX3346796;350953184;202	SAL_MA3854AA								North America	United States											Center for Diease Control and Prevention - Enteric Diseases Laboratory Branch (US)			PRJNA230403	SRP040281	SAMN07822880	SRS2646861	2017-10-31	2017-10-31	95186	95186	95186	95186	35697	269	269	2	2	2	2	2	2	2
SAL_MA4036AA	SSI_AA883	PHE	ERR1540634;ILLUMINA;Paired;300;ERX1611399;290666880;192	SAL_MA4036AA	Food	ND	Food; Food	2014				Europe	Denmark							O:4	5	12; H:I:-	I			STATENS SERUM INSTITUT			PRJEB14853	ERP016530	SAMEA4349675	ERS1261124	2017-11-01	2017-11-01	95408	95365	95365	30476	2	2	2	2	2	2	2	2	2	2
SAL_MA4037AA	SSI_AA882	PHE	ERR1540633;ILLUMINA;Paired;300;ERX1611398;451901880;180	SAL_MA4037AA	Food	ND	Food; Food	2013				Europe	Denmark							O:4	[5]	12; H:I:1	2	I			STATENS SERUM INSTITUT			PRJEB14853	ERP016530	SAMEA4349674	ERS1261123	2017-11-01	2017-11-01	95363	95363	95363	30476	2	2	2	2	2	2	2	2	2	2
SAL_MA4041AA	SSI_AA878	PHE	ERR1540629;ILLUMINA;Paired;300;ERX1611394;361496898;189	SAL_MA4041AA	Food	ND	Food; Food	2014				Europe	Denmark							O:4	5	12; H:I:-	I			STATENS SERUM INSTITUT			PRJEB14853	ERP016530	SAMEA4349670	ERS1261119	2017-11-01	2017-11-01	95365	95365	95365	30476	2	2	2	2	2	2	2	2	2	2
SAL_MA4045AA	SSI_AA874	PHE	ERR1540625;ILLUMINA;Paired;300;ERX1611390;197793888;186	SAL_MA4045AA	Food	ND	Food; Food	2014				Europe	Denmark							O:4	5	12; H:I:-	I			STATENS SERUM INSTITUT			PRJEB14853	ERP016530	SAMEA4349666	ERS1261115	2017-11-01	2017-11-01	95323	95323	95323	302	2	2	2	2	2	2	2	2	2	2
SAL_MA4046AA	SSI_AA873	PHE	ERR1540624;ILLUMINA;Paired;300;ERX1611389;184026590;191	SAL_MA4046AA	Food	ND	Food; Food	2013				Europe	Denmark							O:4	[5]	12; H:I:1	2	I			STATENS SERUM INSTITUT			PRJEB14853	ERP016530	SAMEA4349665	ERS1261114	2017-11-01	2017-11-01	95322	95208	95188	95188	95188	269	269	2	2	2	2	2	2	2
SAL_MA4051AA	SSI_AA868	PHE	ERR1540619;ILLUMINA;Paired;300;ERX1611384;489995424;186	SAL_MA4051AA	Food	ND	Food; Food	2013				Europe	Denmark							O:4	[5]	12; H:I:1	2	I			STATENS SERUM INSTITUT			PRJEB14853	ERP016530	SAMEA4349660	ERS1261109	2017-11-01	2017-11-01	95366	95366	95212	30476	2	2	2	2	2	2	2	2	2	2
SAL_MA4060AA	SSI_AA859	PHE	ERR1540610;ILLUMINA;Paired;300;ERX1611375;254054928;188	SAL_MA4060AA	Food	ND	Food; Food	2013				Europe	Denmark							O:4	[5]	12; H:I:1	2	I			STATENS SERUM INSTITUT			PRJEB14853	ERP016530	SAMEA4349651	ERS1261100	2017-11-01	2017-11-01	95208	95208	95188	95188	95188	269	269	2	2	2	2	2	2	2
SAL_MA4067AA	SSI_AA852	PHE	ERR1540603;ILLUMINA;Paired;300;ERX1611368;472589512;188	SAL_MA4067AA	Food	ND	Food; Food	2010				Europe	Denmark							O:4	[5]	12; H:I:1	2	I			STATENS SERUM INSTITUT			PRJEB14853	ERP016530	SAMEA4349644	ERS1261093	2017-11-01	2017-11-01	95334	95334	95334	39339	39339	39339	269	2	2	2	2	2	2	2
SAL_MA4083AA	SSI_AA835	PHE	ERR1540587;ILLUMINA;Paired;300;ERX1611352;294189148;187	SAL_MA4083AA	Food	ND	Food; Food	2010				Europe	Denmark							O:4	[5]	12; H:I:1	2	I			STATENS SERUM INSTITUT			PRJEB14853	ERP016530	SAMEA4349628	ERS1261077	2017-11-01	2017-11-01	95418	95418	95418	95418	95418	95418	95418	2	2	2	2	2	2	2
SAL_MA4097AA	SSI_AA820	PHE	ERR1540573;ILLUMINA;Paired;300;ERX1611338;316140620;190	SAL_MA4097AA	Food	ND	Food; Food	2010				Europe	Denmark							O:4	[5]	12; H:I:1	2	I			STATENS SERUM INSTITUT			PRJEB14853	ERP016530	SAMEA4349614	ERS1261063	2017-11-01	2017-11-01	95423	95423	95423	95423	39339	39339	269	2	2	2	2	2	2	2
SAL_MA4099AA	SSI_AA818	PHE	ERR1540571;ILLUMINA;Paired;300;ERX1611336;250378492;182	SAL_MA4099AA	Food	ND	Food; Food	2014				Europe	Denmark							O:4	5	12; H:I:-	I			STATENS SERUM INSTITUT			PRJEB14853	ERP016530	SAMEA4349612	ERS1261061	2017-11-01	2017-11-01	95424	95424	95424	95424	2	2	2	2	2	2	2	2	2	2
SAL_MA4106AA	SSI_AA811	PHE	ERR1540564;ILLUMINA;Paired;300;ERX1611329;418448970;171	SAL_MA4106AA	Food	ND	Food; Food	2013				Europe	Denmark							O:4	[5]	12; H:I:1	2	I			STATENS SERUM INSTITUT			PRJEB14853	ERP016530	SAMEA4349605	ERS1261054	2017-11-01	2017-11-01	95430	95430	95430	30476	2	2	2	2	2	2	2	2	2	2
SAL_MA4107AA	SSI_AA810	PHE	ERR1540563;ILLUMINA;Paired;300;ERX1611328;471559216;193	SAL_MA4107AA	Food	ND	Food; Food	2013				Europe	Denmark							O:4	[5]	12; H:I:1	2	I			STATENS SERUM INSTITUT			PRJEB14853	ERP016530	SAMEA4349604	ERS1261053	2017-11-01	2017-11-01	95454	95454	95212	30476	2	2	2	2	2	2	2	2	2	2
SAL_MA4110AA	SSI_AA807	PHE	ERR1540560;ILLUMINA;Paired;300;ERX1611325;287560728;182	SAL_MA4110AA	Food	ND	Food; Food	2014				Europe	Denmark							O:4	[5]	12; H:I:1	2	I			STATENS SERUM INSTITUT			PRJEB14853	ERP016530	SAMEA4349601	ERS1261050	2017-11-01	2017-11-01	77286	77286	77286	30476	2	2	2	2	2	2	2	2	2	2
SAL_MA4112AA	SSI_AA729	PHE	ERR1540558;ILLUMINA;Paired;300;ERX1611323;469398308;202	SAL_MA4112AA	Human	Human	Human; Human	2014				Europe	Denmark							O:4	[5]	12; H:I:1	2	I			STATENS SERUM INSTITUT			PRJEB14853	ERP016530	SAMEA4349599	ERS1261048	2017-11-01	2017-11-01	95276	95276	77345	77345	29153	2	2	2	2	2	2	2	2	2
SAL_MA4114AA	SSI_AA727	PHE	ERR1540556;ILLUMINA;Paired;300;ERX1611321;409225264;196	SAL_MA4114AA	Human	Human	Human; Human	2014				Europe	Denmark							O:4	[5]	12; H:I:1	2	I			STATENS SERUM INSTITUT			PRJEB14853	ERP016530	SAMEA4349597	ERS1261046	2017-11-01	2017-11-01	95429	95429	95188	95188	95188	269	269	2	2	2	2	2	2	2
SAL_MA4145AA	SSI_AA677	PHE	ERR1540525;ILLUMINA;Paired;300;ERX1611290;347768640;240	SAL_MA4145AA	Human	Human	Human; Human	2014				Europe	Denmark							O:4	[5]	12; H:I:1	2	I			STATENS SERUM INSTITUT			PRJEB14853	ERP016530	SAMEA4349566	ERS1261015	2017-11-01	2017-11-01	95438	95438	95438	95438	95438	269	269	2	2	2	2	2	2	2
SAL_MA4162AA	SSI_AA660	PHE	ERR1540508;ILLUMINA;Paired;300;ERX1611273;460817280;231	SAL_MA4162AA	Human	Human	Human; Human	2014				Europe	Denmark							O:4	12; H:I: -	I			STATENS SERUM INSTITUT			PRJEB14853	ERP016530	SAMEA4349549	ERS1260998	2017-11-01	2017-11-01	95374	95374	95374	95374	95374	2	2	2	2	2	2	2	2	2
SAL_MA4167AA	SSI_AA655	PHE	ERR1540503;ILLUMINA;Paired;300;ERX1611268;352795208;244	SAL_MA4167AA	Human	Human	Human; Human	2014				Europe	Denmark							O:4	[5]	12; H:I:1	2	I			STATENS SERUM INSTITUT			PRJEB14853	ERP016530	SAMEA4349544	ERS1260993	2017-11-01	2017-11-01	95281	95281	95281	95281	1659	2	2	2	2	2	2	2	2	2
SAL_MA4182AA	SSI_AA640	PHE	ERR1540488;ILLUMINA;Paired;300;ERX1611253;391496896;224	SAL_MA4182AA	Human	Human	Human; Human	2014				Europe	Denmark							O:4	[5]	12; H:I:1	2	I			STATENS SERUM INSTITUT			PRJEB14853	ERP016530	SAMEA4349529	ERS1260978	2017-11-01	2017-11-01	1679	1679	1679	1679	1471	269	269	2	2	2	2	2	2	2
SAL_MA4192AA	SSI_AA630	PHE	ERR1540478;ILLUMINA;Paired;300;ERX1611243;468304928;208	SAL_MA4192AA	Human	Human	Human; Human	2014				Europe	Denmark							O:4	[5]	12; H:I:1	2	I			STATENS SERUM INSTITUT			PRJEB14853	ERP016530	SAMEA4349519	ERS1260968	2017-11-01	2017-11-01	95439	95439	85463	85463	7386	2	2	2	2	2	2	2	2	2
SAL_MA4218AA	SSI_AA603	PHE	ERR1540452;ILLUMINA;Paired;300;ERX1611217;336249056;197	SAL_MA4218AA	Human	Human	Human; Human	2014				Europe	Denmark							O:4	12; H:-:-	I			STATENS SERUM INSTITUT			PRJEB14853	ERP016530	SAMEA4349493	ERS1260942	2017-11-01	2017-11-01	3740	3740	3740	3740	3740	2	2	2	2	2	2	2	2	2
SAL_MA4219AA	SSI_AA602	PHE	ERR1540451;ILLUMINA;Paired;300;ERX1611216;366930620;203	SAL_MA4219AA	Human	Human	Human; Human	2014				Europe	Denmark							O:4	12; H:I: -	I			STATENS SERUM INSTITUT			PRJEB14853	ERP016530	SAMEA4349492	ERS1260941	2017-11-01	2017-11-01	95392	95392	95392	95392	95392	2	2	2	2	2	2	2	2	2
SAL_MA4233AA	SSI_AA588	PHE	ERR1540437;ILLUMINA;Paired;300;ERX1611202;392394128;203	SAL_MA4233AA	Human	Human	Human; Human	2014				Europe	Denmark							O:4	[5]	12; H:I:1	2	I			STATENS SERUM INSTITUT			PRJEB14853	ERP016530	SAMEA4349478	ERS1260927	2017-11-01	2017-11-01	95441	95441	95441	95441	95441	2	2	2	2	2	2	2	2	2
SAL_MA4241AA	SSI_AA580	PHE	ERR1540429;ILLUMINA;Paired;300;ERX1611194;452017944;196	SAL_MA4241AA	Human	Human	Human; Human	2014				Europe	Denmark							O:4	[5]	12; H:I:1	2	I			STATENS SERUM INSTITUT			PRJEB14853	ERP016530	SAMEA4349470	ERS1260919	2017-11-01	2017-11-01	95443	95443	77286	30476	2	2	2	2	2	2	2	2	2	2
SAL_MA4244AA	SSI_AA577	PHE	ERR1540426;ILLUMINA;Paired;300;ERX1611191;357594336;198	SAL_MA4244AA	Human	Human	Human; Human	2014				Europe	Denmark							O:4	[5]	12; H:I:1	2	I			STATENS SERUM INSTITUT			PRJEB14853	ERP016530	SAMEA4349467	ERS1260916	2017-11-01	2017-11-01	77286	77286	77286	30476	2	2	2	2	2	2	2	2	2	2
SAL_MA4247AA	SSI_AA574	PHE	ERR1540423;ILLUMINA;Paired;300;ERX1611188;356501376;198	SAL_MA4247AA	Human	Human	Human; Human	2014				Europe	Denmark							O:4	12; H:I: -	I			STATENS SERUM INSTITUT			PRJEB14853	ERP016530	SAMEA4349464	ERS1260913	2017-11-01	2017-11-01	95270	95270	95257	95257	2	2	2	2	2	2	2	2	2	2
SAL_MA4249AA	SSI_AA572	PHE	ERR1540421;ILLUMINA;Paired;300;ERX1611186;590224530;203	SAL_MA4249AA	Human	Human	Human; Human	2014				Europe	Denmark							O:4	[5]	12; H:I:1	2	I			STATENS SERUM INSTITUT			PRJEB14853	ERP016530	SAMEA4349462	ERS1260911	2017-11-01	2017-11-01	95444	95444	95441	95441	95441	2	2	2	2	2	2	2	2	2
SAL_MA4282AA	SSI_AA525	PHE	ERR1540388;ILLUMINA;Paired;300;ERX1611153;442421012;242	SAL_MA4282AA	Human	Human	Human; Human	2014				Europe	Denmark							O:4	12; H:I: -	I			STATENS SERUM INSTITUT			PRJEB14853	ERP016530	SAMEA4349429	ERS1260878	2017-11-01	2017-11-01	95257	95257	95257	95257	2	2	2	2	2	2	2	2	2	2
SAL_MA4299AA	SSI_AA422	PHE	ERR1540371;ILLUMINA;Paired;300;ERX1611136;292921672;188	SAL_MA4299AA	Human	Human	Human; Human	2013				Europe	Denmark							O:4	[5]	12; H:I:1	2	I			STATENS SERUM INSTITUT			PRJEB14853	ERP016530	SAMEA4349412	ERS1260861	2017-11-01	2017-11-01	95247	95247	95188	95188	95188	269	269	2	2	2	2	2	2	2
SAL_MA4300AA	SSI_AA421	PHE	ERR1540370;ILLUMINA;Paired;300;ERX1611135;438211080;235	SAL_MA4300AA	Human	Human	Human; Human	2013				Europe	Denmark							O:4	[5]	12; H:I:1	2	I			STATENS SERUM INSTITUT			PRJEB14853	ERP016530	SAMEA4349411	ERS1260860	2017-11-01	2017-11-01	95324	95324	95188	95188	95188	269	269	2	2	2	2	2	2	2
SAL_MA4302AA	SSI_AA419	PHE	ERR1540368;ILLUMINA;Paired;300;ERX1611133;177357884;139	SAL_MA4302AA	Human	Human	Human; Human	2013				Europe	Denmark							O:4	[5]	12; H:I:1	2	I			STATENS SERUM INSTITUT			PRJEB14853	ERP016530	SAMEA4349409	ERS1260858	2017-11-01	2017-11-01	95208	95208	95188	95188	95188	269	269	2	2	2	2	2	2	2
SAL_MA4303AA	SSI_AA418	PHE	ERR1540367;ILLUMINA;Paired;300;ERX1611132;465317268;221	SAL_MA4303AA	Human	Human	Human; Human	2013				Europe	Denmark							O:4	[5]	12; H:I:1	2	I			STATENS SERUM INSTITUT			PRJEB14853	ERP016530	SAMEA4349408	ERS1260857	2017-11-01	2017-11-01	95208	95208	95188	95188	95188	269	269	2	2	2	2	2	2	2
SAL_MA4306AA	SSI_AA415	PHE	ERR1540364;ILLUMINA;Paired;300;ERX1611129;246495600;229	SAL_MA4306AA	Human	Human	Human; Human	2013				Europe	Denmark							O:4	[5]	12; H:I:1	2	I			STATENS SERUM INSTITUT			PRJEB14853	ERP016530	SAMEA4349405	ERS1260854	2017-11-01	2017-11-01	95411	95411	95411	85052	39339	39339	269	2	2	2	2	2	2	2
SAL_MA4307AA	SSI_AA414	PHE	ERR1540363;ILLUMINA;Paired;300;ERX1611128;254388616;148	SAL_MA4307AA	Human	Human	Human; Human	2013				Europe	Denmark							O:4	[5]	12; H:I:1	2	I			STATENS SERUM INSTITUT			PRJEB14853	ERP016530	SAMEA4349404	ERS1260853	2017-11-01	2017-11-01	95208	95208	95188	95188	95188	269	269	2	2	2	2	2	2	2
SAL_MA4308AA	SSI_AA413	PHE	ERR1540362;ILLUMINA;Paired;300;ERX1611127;160821980;230	SAL_MA4308AA	Human	Human	Human; Human	2013				Europe	Denmark							O:4	[5]	12; H:I:1	2	I			STATENS SERUM INSTITUT			PRJEB14853	ERP016530	SAMEA4349403	ERS1260852	2017-11-01	2017-11-01	95249	95249	95212	30476	2	2	2	2	2	2	2	2	2	2
SAL_MA4309AA	SSI_AA412	PHE	ERR1540361;ILLUMINA;Paired;300;ERX1611126;301377872;146	SAL_MA4309AA	Human	Human	Human; Human	2013				Europe	Denmark							O:4	[5]	12; H:I:1	2	I			STATENS SERUM INSTITUT			PRJEB14853	ERP016530	SAMEA4349402	ERS1260851	2017-11-01	2017-11-01	95208	95208	95188	95188	95188	269	269	2	2	2	2	2	2	2
SAL_MA4312AA	SSI_AA409	PHE	ERR1540358;ILLUMINA;Paired;300;ERX1611123;326554600;148	SAL_MA4312AA	Human	Human	Human; Human	2013				Europe	Denmark							O:4	[5]	12; H:I:1	2	I			STATENS SERUM INSTITUT			PRJEB14853	ERP016530	SAMEA4349399	ERS1260848	2017-11-01	2017-11-01	95208	95208	95188	95188	95188	269	269	2	2	2	2	2	2	2
SAL_MA4314AA	SSI_AA407	PHE	ERR1540356;ILLUMINA;Paired;300;ERX1611121;236271990;145	SAL_MA4314AA	Human	Human	Human; Human	2013				Europe	Denmark							O:4	[5]	12; H:I:1	2	I			STATENS SERUM INSTITUT			PRJEB14853	ERP016530	SAMEA4349397	ERS1260846	2017-11-01	2017-11-01	95208	95208	95188	95188	95188	269	269	2	2	2	2	2	2	2
SAL_MA4316AA	SSI_AA403	PHE	ERR1540354;ILLUMINA;Paired;300;ERX1611119;406675040;227	SAL_MA4316AA	Human	Human	Human; Human	2013				Europe	Denmark							O:4	[5]	12; H:I:1	2	I			STATENS SERUM INSTITUT			PRJEB14853	ERP016530	SAMEA4349395	ERS1260844	2017-11-01	2017-11-01	95413	95413	95413	95413	95252	2	2	2	2	2	2	2	2	2
SAL_MA4319AA	SSI_AA400	PHE	ERR1540351;ILLUMINA;Paired;300;ERX1611116;148020786;219	SAL_MA4319AA	Human	Human	Human; Human	2013				Europe	Denmark							O:4	[5]	12; H:I:1	2	I			STATENS SERUM INSTITUT			PRJEB14853	ERP016530	SAMEA4349392	ERS1260841	2017-11-01	2017-11-01	95208	95208	95188	95188	95188	269	269	2	2	2	2	2	2	2
SAL_MA4322AA	SSI_AA397	PHE	ERR1540348;ILLUMINA;Paired;300;ERX1611113;254754432;228	SAL_MA4322AA	Human	Human	Human; Human	2013				Europe	Denmark							O:4	[5]	12; H:I:1	2	I			STATENS SERUM INSTITUT			PRJEB14853	ERP016530	SAMEA4349389	ERS1260838	2017-11-01	2017-11-01	95252	95252	95252	95252	95252	2	2	2	2	2	2	2	2	2
SAL_MA4323AA	SSI_AA396	PHE	ERR1540347;ILLUMINA;Paired;300;ERX1611112;338111424;144	SAL_MA4323AA	Human	Human	Human; Human	2013				Europe	Denmark							O:4	[5]	12; H:I:1	2	I			STATENS SERUM INSTITUT			PRJEB14853	ERP016530	SAMEA4349388	ERS1260837	2017-11-01	2017-11-01	95208	95208	95188	95188	95188	269	269	2	2	2	2	2	2	2
SAL_MA4326AA	SSI_AA392	PHE	ERR1540344;ILLUMINA;Paired;300;ERX1611109;164767328;232	SAL_MA4326AA	Human	Human	Human; Human	2013				Europe	Denmark							O:4	[5]	12; H:I:1	2	I			STATENS SERUM INSTITUT			PRJEB14853	ERP016530	SAMEA4349385	ERS1260834	2017-11-01	2017-11-01	95298	95298	95212	30476	2	2	2	2	2	2	2	2	2	2
SAL_MA4327AA	SSI_AA391	PHE	ERR1540343;ILLUMINA;Paired;300;ERX1611108;632865384;201	SAL_MA4327AA	Human	Human	Human; Human	2013				Europe	Denmark							O:4	[5]	12; H:I:1	2	I			STATENS SERUM INSTITUT			PRJEB14853	ERP016530	SAMEA4349384	ERS1260833	2017-11-01	2017-11-01	95248	95248	95188	95188	95188	269	269	2	2	2	2	2	2	2
SAL_MA4328AA	SSI_AA390	PHE	ERR1540342;ILLUMINA;Paired;300;ERX1611107;253484160;235	SAL_MA4328AA	Human	Human	Human; Human	2013				Europe	Denmark							O:4	[5]	12; H:I:1	2	I			STATENS SERUM INSTITUT			PRJEB14853	ERP016530	SAMEA4349383	ERS1260832	2017-11-01	2017-11-01	95250	95250	95212	30476	2	2	2	2	2	2	2	2	2	2
SAL_MA4331AA	SSI_AA387	PHE	ERR1540339;ILLUMINA;Paired;300;ERX1611104;296257920;235	SAL_MA4331AA	Human	Human	Human; Human	2013				Europe	Denmark							O:4	[5]	12; H:I:1	2	I			STATENS SERUM INSTITUT			PRJEB14853	ERP016530	SAMEA4349380	ERS1260829	2017-11-01	2017-11-01	95340	95340	95188	95188	95188	269	269	2	2	2	2	2	2	2
SAL_MA4336AA	SSI_AA382	PHE	ERR1540334;ILLUMINA;Paired;300;ERX1611099;365837778;239	SAL_MA4336AA	Human	Human	Human; Human	2013				Europe	Denmark							O:4	[5]	12; H:I:1	2	I			STATENS SERUM INSTITUT			PRJEB14853	ERP016530	SAMEA4349375	ERS1260824	2017-11-01	2017-11-01	95250	95250	95212	30476	2	2	2	2	2	2	2	2	2	2
SAL_MA4339AA	SSI_AA379	PHE	ERR1540331;ILLUMINA;Paired;300;ERX1611096;142777320;186	SAL_MA4339AA	Human	Human	Human; Human	2013				Europe	Denmark							O:4	[5]	12; H:I:1	2	I			STATENS SERUM INSTITUT			PRJEB14853	ERP016530	SAMEA4349372	ERS1260821	2017-11-01	2017-11-01	95420	95420	85471	29153	29153	2	2	2	2	2	2	2	2	2
SAL_MA4341AA	SSI_AA377	PHE	ERR1540329;ILLUMINA;Paired;300;ERX1611094;359404560;216	SAL_MA4341AA	Human	Human	Human; Human	2013				Europe	Denmark							O:4	[5]	12; H:I:1	2	I			STATENS SERUM INSTITUT			PRJEB14853	ERP016530	SAMEA4349370	ERS1260819	2017-11-01	2017-11-01	95208	95208	95188	95188	95188	269	269	2	2	2	2	2	2	2
SAL_MA4342AA	SSI_AA376	PHE	ERR1540328;ILLUMINA;Paired;300;ERX1611093;376756110;145	SAL_MA4342AA	Human	Human	Human; Human	2013				Europe	Denmark							O:4	[5]	12; H:I:1	2	I			STATENS SERUM INSTITUT			PRJEB14853	ERP016530	SAMEA4349369	ERS1260818	2017-11-01	2017-11-01	95208	95208	95188	95188	95188	269	269	2	2	2	2	2	2	2
SAL_MA4344AA	SSI_AA374	PHE	ERR1540326;ILLUMINA;Paired;300;ERX1611091;281296230;145	SAL_MA4344AA	Human	Human	Human; Human	2013				Europe	Denmark							O:4	[5]	12; H:I:1	2	I			STATENS SERUM INSTITUT			PRJEB14853	ERP016530	SAMEA4349367	ERS1260816	2017-11-01	2017-11-01	95208	95208	95188	95188	95188	269	269	2	2	2	2	2	2	2
SAL_MA4349AA	SSI_AA369	PHE	ERR1540321;ILLUMINA;Paired;300;ERX1611086;271087440;228	SAL_MA4349AA	Human	Human	Human; Human	2013				Europe	Denmark							O:4	[5]	12; H:I:1	2	I			STATENS SERUM INSTITUT			PRJEB14853	ERP016530	SAMEA4349362	ERS1260811	2017-11-01	2017-11-01	95208	95208	95188	95188	95188	269	269	2	2	2	2	2	2	2
SAL_MA4359AA	SSI_AA358	PHE	ERR1540311;ILLUMINA;Paired;300;ERX1611076;219073448;244	SAL_MA4359AA	Human	Human	Human; Human	2013				Europe	Denmark							O:4	[5]	12; H:I:1	2	I			STATENS SERUM INSTITUT			PRJEB14853	ERP016530	SAMEA4349352	ERS1260801	2017-11-01	2017-11-01	95244	95208	95188	95188	95188	269	269	2	2	2	2	2	2	2
SAL_MA4360AA	SSI_AA357	PHE	ERR1540310;ILLUMINA;Paired;300;ERX1611075;588487760;190	SAL_MA4360AA	Human	Human	Human; Human	2013				Europe	Denmark							O:4	[5]	12; H:I:1	2	I			STATENS SERUM INSTITUT			PRJEB14853	ERP016530	SAMEA4349351	ERS1260800	2017-11-01	2017-11-01	95309	95309	95188	95188	95188	269	269	2	2	2	2	2	2	2
SAL_MA4361AA	SSI_AA356	PHE	ERR1540309;ILLUMINA;Paired;300;ERX1611074;160023592;146	SAL_MA4361AA	Human	Human	Human; Human	2013				Europe	Denmark							O:4	[5]	12; H:I:1	2	I			STATENS SERUM INSTITUT			PRJEB14853	ERP016530	SAMEA4349350	ERS1260799	2017-11-01	2017-11-01	95245	95245	95188	95188	95188	269	269	2	2	2	2	2	2	2
SAL_MA4362AA	SSI_AA354	PHE	ERR1540308;ILLUMINA;Paired;300;ERX1611073;336326340;145	SAL_MA4362AA	Human	Human	Human; Human	2013				Europe	Denmark							O:4	[5]	12; H:I:1	2	I			STATENS SERUM INSTITUT			PRJEB14853	ERP016530	SAMEA4349349	ERS1260798	2017-11-01	2017-11-01	95208	95208	95188	95188	95188	269	269	2	2	2	2	2	2	2
SAL_MA4364AA	SSI_AA352	PHE	ERR1540306;ILLUMINA;Paired;300;ERX1611071;454581136;233	SAL_MA4364AA	Human	Human	Human; Human	2013				Europe	Denmark							O:4	[5]	12; H:I:1	2	I			STATENS SERUM INSTITUT			PRJEB14853	ERP016530	SAMEA4349347	ERS1260796	2017-11-01	2017-11-01	95208	95208	95188	95188	95188	269	269	2	2	2	2	2	2	2
SAL_MA4365AA	SSI_AA351	PHE	ERR1540305;ILLUMINA;Paired;300;ERX1611070;266584608;144	SAL_MA4365AA	Human	Human	Human; Human	2013				Europe	Denmark							O:4	[5]	12; H:I:1	2	I			STATENS SERUM INSTITUT			PRJEB14853	ERP016530	SAMEA4349346	ERS1260795	2017-11-01	2017-11-01	95208	95208	95188	95188	95188	269	269	2	2	2	2	2	2	2
SAL_MA4367AA	SSI_AA349	PHE	ERR1540303;ILLUMINA;Paired;300;ERX1611068;397051180;145	SAL_MA4367AA	Human	Human	Human; Human	2013				Europe	Denmark							O:4	[5]	12; H:I:1	2	I			STATENS SERUM INSTITUT			PRJEB14853	ERP016530	SAMEA4349344	ERS1260793	2017-11-01	2017-11-01	95307	95307	95212	30476	2	2	2	2	2	2	2	2	2	2
SAL_MA4368AA	SSI_AA348	PHE	ERR1540302;ILLUMINA;Paired;300;ERX1611067;311835976;188	SAL_MA4368AA	Human	Human	Human; Human	2013				Europe	Denmark							O:4	[5]	12; H:I:1	2	I			STATENS SERUM INSTITUT			PRJEB14853	ERP016530	SAMEA4349343	ERS1260792	2017-11-01	2017-11-01	95208	95208	95188	95188	95188	269	269	2	2	2	2	2	2	2
SAL_MA4371AA	SSI_AA345	PHE	ERR1540299;ILLUMINA;Paired;300;ERX1611064;198032832;144	SAL_MA4371AA	Human	Human	Human; Human	2013				Europe	Denmark							O:4	[5]	12; H:I:1	2	I			STATENS SERUM INSTITUT			PRJEB14853	ERP016530	SAMEA4349340	ERS1260789	2017-11-01	2017-11-01	95274	95189	95188	95188	95188	269	269	2	2	2	2	2	2	2
SAL_MA4373AA	SSI_AA343	PHE	ERR1540297;ILLUMINA;Paired;300;ERX1611062;235678164;146	SAL_MA4373AA	Human	Human	Human; Human	2013				Europe	Denmark							O:4	[5]	12; H:I:1	2	I			STATENS SERUM INSTITUT			PRJEB14853	ERP016530	SAMEA4349338	ERS1260787	2017-11-01	2017-11-01	95370	95370	95188	95188	95188	269	269	2	2	2	2	2	2	2
SAL_MA4375AA	SSI_AA341	PHE	ERR1540295;ILLUMINA;Paired;300;ERX1611060;267955816;236	SAL_MA4375AA	Human	Human	Human; Human	2013				Europe	Denmark							O:4	[5]	12; H:I:1	2	I			STATENS SERUM INSTITUT			PRJEB14853	ERP016530	SAMEA4349336	ERS1260785	2017-11-01	2017-11-01	95208	95208	95188	95188	95188	269	269	2	2	2	2	2	2	2
SAL_MA4376AA	SSI_AA340	PHE	ERR1540294;ILLUMINA;Paired;300;ERX1611059;252247904;202	SAL_MA4376AA	Human	Human	Human; Human	2013				Europe	Denmark							O:4	[5]	12; H:I:1	2	I			STATENS SERUM INSTITUT			PRJEB14853	ERP016530	SAMEA4349335	ERS1260784	2017-11-01	2017-11-01	95189	95189	95188	95188	95188	269	269	2	2	2	2	2	2	2
SAL_MA4377AA	SSI_AA339	PHE	ERR1540293;ILLUMINA;Paired;300;ERX1611058;256982484;146	SAL_MA4377AA	Human	Human	Human; Human	2013				Europe	Denmark							O:4	[5]	12; H:I:1	2	I			STATENS SERUM INSTITUT			PRJEB14853	ERP016530	SAMEA4349334	ERS1260783	2017-11-01	2017-11-01	95208	95208	95188	95188	95188	269	269	2	2	2	2	2	2	2
SAL_MA4381AA	SSI_AA334	PHE	ERR1540289;ILLUMINA;Paired;300;ERX1611054;209164820;145	SAL_MA4381AA	Human	Human	Human; Human	2013				Europe	Denmark							O:4	[5]	12; H:I:1	2	I			STATENS SERUM INSTITUT			PRJEB14853	ERP016530	SAMEA4349330	ERS1260779	2017-11-01	2017-11-01	95208	95208	95188	95188	95188	269	269	2	2	2	2	2	2	2
SAL_MA4384AA	SSI_AA331	PHE	ERR1540286;ILLUMINA;Paired;300;ERX1611051;264721228;142	SAL_MA4384AA	Human	Human	Human; Human	2013				Europe	Denmark							O:4	[5]	12; H:I:1	2	I			STATENS SERUM INSTITUT			PRJEB14853	ERP016530	SAMEA4349327	ERS1260776	2017-11-01	2017-11-01	95208	95208	95188	95188	95188	269	269	2	2	2	2	2	2	2
SAL_MA4386AA	SSI_AA329	PHE	ERR1540284;ILLUMINA;Paired;300;ERX1611049;396638934;237	SAL_MA4386AA	Human	Human	Human; Human	2013				Europe	Denmark							O:4	[5]	12; H:I:1	2	I			STATENS SERUM INSTITUT			PRJEB14853	ERP016530	SAMEA4349325	ERS1260774	2017-11-01	2017-11-01	95212	95212	95212	30476	2	2	2	2	2	2	2	2	2	2
SAL_MA4387AA	SSI_AA328	PHE	ERR1540283;ILLUMINA;Paired;300;ERX1611048;246594920;143	SAL_MA4387AA	Human	Human	Human; Human	2013				Europe	Denmark							O:4	[5]	12; H:I:1	2	I			STATENS SERUM INSTITUT			PRJEB14853	ERP016530	SAMEA4349324	ERS1260773	2017-11-01	2017-11-01	95211	95211	95188	95188	95188	269	269	2	2	2	2	2	2	2
SAL_MA4389AA	SSI_AA326	PHE	ERR1540281;ILLUMINA;Paired;300;ERX1611046;361385332;146	SAL_MA4389AA	Human	Human	Human; Human	2013				Europe	Denmark							O:4	[5]	12; H:I:1	2	I			STATENS SERUM INSTITUT			PRJEB14853	ERP016530	SAMEA4349322	ERS1260771	2017-11-01	2017-11-01	95208	95208	95188	95188	95188	269	269	2	2	2	2	2	2	2
SAL_MA4390AA	SSI_AA325	PHE	ERR1540280;ILLUMINA;Paired;300;ERX1611045;346659552;144	SAL_MA4390AA	Human	Human	Human; Human	2013				Europe	Denmark							O:4	[5]	12; H:I:1	2	I			STATENS SERUM INSTITUT			PRJEB14853	ERP016530	SAMEA4349321	ERS1260770	2017-11-01	2017-11-01	95382	95382	95188	95188	95188	269	269	2	2	2	2	2	2	2
SAL_MA4391AA	SSI_AA324	PHE	ERR1540279;ILLUMINA;Paired;300;ERX1611044;408223300;146	SAL_MA4391AA	Human	Human	Human; Human	2013				Europe	Denmark							O:4	[5]	12; H:I:1	2	I			STATENS SERUM INSTITUT			PRJEB14853	ERP016530	SAMEA4349320	ERS1260769	2017-11-01	2017-11-01	95260	95260	95188	95188	95188	269	269	2	2	2	2	2	2	2
SAL_MA4394AA	SSI_AA320	PHE	ERR1540276;ILLUMINA;Paired;300;ERX1611041;280817680;143	SAL_MA4394AA	Human	Human	Human; Human	2013				Europe	Denmark							O:4	[5]	12; H:I:1	2	I			STATENS SERUM INSTITUT			PRJEB14853	ERP016530	SAMEA4349317	ERS1260766	2017-11-01	2017-11-01	95208	95208	95188	95188	95188	269	269	2	2	2	2	2	2	2
SAL_MA4395AA	SSI_AA318	PHE	ERR1540275;ILLUMINA;Paired;300;ERX1611040;252921006;141	SAL_MA4395AA	Human	Human	Human; Human	2013				Europe	Denmark							O:4	[5]	12; H:I:1	2	I			STATENS SERUM INSTITUT			PRJEB14853	ERP016530	SAMEA4349316	ERS1260765	2017-11-01	2017-11-01	95188	95188	95188	95188	95188	269	269	2	2	2	2	2	2	2
SAL_MA4398AA	SSI_AA315	PHE	ERR1540272;ILLUMINA;Paired;300;ERX1611037;251140240;226	SAL_MA4398AA	Human	Human	Human; Human	2013				Europe	Denmark							O:4	[5]	12; H:I:1	2	I			STATENS SERUM INSTITUT			PRJEB14853	ERP016530	SAMEA4349313	ERS1260762	2017-11-01	2017-11-01	95208	95208	95188	95188	95188	269	269	2	2	2	2	2	2	2
SAL_MA4665AA	PNUSAS025996	PHE	SRR6243455;ILLUMINA;Paired;;SRX3350638;593770730;245	SAL_MA4665AA								North America	United States											Center for Diease Control and Prevention - Enteric Diseases Laboratory Branch (US)			PRJNA230403	SRP040281	SAMN07842123	SRS2649981	2017-11-02	2017-11-01	95528	95528	95528	95528	2	2	2	2	2	2	2	2	2	2
SAL_MA4791AA	FSIS11704571	PHE	SRR6250377;ILLUMINA;Paired;300;SRX3357321;427295942;149	SAL_MA4791AA	Livestock	Bovine	animal-cattle-dairy cow	2017				North America	United States	California						Typhimurium	I			Department of Agriculture - Food Safety and Inspection Service (US)			PRJNA292666	SRP062916	SAMN07968667	SRS2656404	2017-11-03	2017-11-02	95837	95837	271	271	269	269	269	2	2	2	2	2	2	2
SAL_MA5241AA	27-10-8101122	PHE	traces-0JiCcsX;ILLUMINA;Paired;;NA;509020470;251	SAL_MA5241AA								Europe	United Kingdom	Scotland						Typhimurium				D. Brown (Scotland)							2017-11-06	2018-05-11	96091	96091	88101	1891	1891	269	269	2	2	2	2	2	2	2
SAL_MA5249AA	27-19-8101131	PHE	traces-0tBYfMh;ILLUMINA;Paired;;NA;72189848;254	SAL_MA5249AA								Europe	United Kingdom	Scotland						(I)4	12:i:-				D. Brown (Scotland)							2017-11-06	2018-05-11	186109	186107	186107	186107	186107	186107	2	2	2	2	2	2	2	2
SAL_MA5501AA	CFSAN068044	PHE	SRR6283999;ILLUMINA;Paired;500;SRX3386113;849935944;143	SAL_MA5501AA	Livestock	Swine	Mesenteric lymph node (Sus scrofa domesticus)	2005				South America	Brazil							Typhimurium	I			Food and Drug Administration - Center for Food Safety and Applied Nutrition (US)			PRJNA186035	SRP018785	SAMN08016474	SRS2681559	2017-11-13	2017-11-13	97114	97114	97114	97114	97114	97114	269	2	2	2	2	2	2	2
SAL_MA5502AA	CFSAN068036	PHE	SRR6283833;ILLUMINA;Paired;500;SRX3385947;886750128;141	SAL_MA5502AA	Environment	Soil/Dust	Swab drag	2011				South America	Brazil							Typhimurium	I			Food and Drug Administration - Center for Food Safety and Applied Nutrition (US)			PRJNA186035	SRP018785	SAMN08016465	SRS2681393	2017-11-13	2017-11-13	97115	97115	97115	97115	78415	269	269	2	2	2	2	2	2	2
SAL_MA5503AA	CFSAN068033	PHE	SRR6283673;ILLUMINA;Paired;500;SRX3385788;710289294;143	SAL_MA5503AA	Livestock	Swine	Mesenteric lymph node (Sus scrofa domesticus)	2000				South America	Brazil							Typhimurium	I			Food and Drug Administration - Center for Food Safety and Applied Nutrition (US)			PRJNA186035	SRP018785	SAMN08016458	SRS2681234	2017-11-13	2017-11-13	97312	97312	97312	97312	97312	9817	269	2	2	2	2	2	2	2
SAL_MA5504AA	CFSAN068037	PHE	SRR6283626;ILLUMINA;Paired;500;SRX3385741;1031606996;142	SAL_MA5504AA	Livestock	Swine	Swab swine carcass (Sus scrofa domesticus)	2012				South America	Brazil							Typhimurium	I			Food and Drug Administration - Center for Food Safety and Applied Nutrition (US)			PRJNA186035	SRP018785	SAMN08016442	SRS2681203	2017-11-13	2017-11-13	97314	97314	97314	97314	97314	61201	269	2	2	2	2	2	2	2
SAL_MA5505AA	CFSAN068047	PHE	SRR6283625;ILLUMINA;Paired;500;SRX3385740;769723776;144	SAL_MA5505AA	Livestock	Swine	Mesenteric lymph node (Sus scrofa domesticus)	2005				South America	Brazil							Typhimurium	I			Food and Drug Administration - Center for Food Safety and Applied Nutrition (US)			PRJNA186035	SRP018785	SAMN08016441	SRS2681202	2017-11-13	2017-11-13	97313	97313	97313	92506	92506	35745	269	2	2	2	2	2	2	2
SAL_MA5600AA	CFSAN068029	PHE	SRR6283528;ILLUMINA;Paired;500;SRX3385643;1018853920;140	SAL_MA5600AA	Livestock	Swine	Swine faeces (Sus scrofa domesticus)	2004				South America	Brazil							Typhimurium	I			Food and Drug Administration - Center for Food Safety and Applied Nutrition (US)			PRJNA186035	SRP018785	SAMN08016403	SRS2681109	2017-11-13	2017-11-13	97258	97258	97258	97258	97258	35745	269	2	2	2	2	2	2	2
SAL_MA5624AA	CFSAN068040	PHE	SRR6283504;ILLUMINA;Paired;500;SRX3385619;742362912;144	SAL_MA5624AA	Livestock	Swine	Mesenteric lymph node (Sus scrofa domesticus)	2005				South America	Brazil							Typhimurium	I			Food and Drug Administration - Center for Food Safety and Applied Nutrition (US)			PRJNA186035	SRP018785	SAMN08016390	SRS2681082	2017-11-13	2017-11-13	97276	97276	97276	97276	97276	9817	269	2	2	2	2	2	2	2
SAL_MA5634AA	CFSAN068030	PHE	SRR6283491;ILLUMINA;Paired;500;SRX3385606;970250400;140	SAL_MA5634AA	Livestock	Swine	Swine faeces (Sus scrofa domesticus)	2008				South America	Brazil							Typhimurium	I			Food and Drug Administration - Center for Food Safety and Applied Nutrition (US)			PRJNA186035	SRP018785	SAMN08016388	SRS2681072	2017-11-13	2017-11-13	97286	97286	97286	97286	97286	35745	269	2	2	2	2	2	2	2
SAL_MA5661AA	CFSAN068041	PHE	SRR6283416;ILLUMINA;Paired;500;SRX3385531;675464520;145	SAL_MA5661AA	Environment	Soil/Dust	Herd environment	2007				South America	Brazil							Typhimurium	I			Food and Drug Administration - Center for Food Safety and Applied Nutrition (US)			PRJNA186035	SRP018785	SAMN08016210	SRS2680995	2017-11-13	2017-11-13	97305	97305	97305	97305	92506	35745	269	2	2	2	2	2	2	2
SAL_MA5662AA	CFSAN068043	PHE	SRR6283403;ILLUMINA;Paired;500;SRX3385518;1003069256;142	SAL_MA5662AA	Livestock	Swine	Mesenteric lymph node (Sus scrofa domesticus)	2005				South America	Brazil							Typhimurium	I			Food and Drug Administration - Center for Food Safety and Applied Nutrition (US)			PRJNA186035	SRP018785	SAMN08016211	SRS2680982	2017-11-13	2017-11-13	97306	97306	97306	97306	78415	269	269	2	2	2	2	2	2	2
SAL_MA5663AA	CFSAN068032	PHE	SRR6283292;ILLUMINA;Paired;500;SRX3385407;744481440;144	SAL_MA5663AA	Livestock	Swine	Swine faeces (Sus scrofa domesticus)	2008				South America	Brazil							Typhimurium	I			Food and Drug Administration - Center for Food Safety and Applied Nutrition (US)			PRJNA186035	SRP018785	SAMN08016037	SRS2680871	2017-11-13	2017-11-13	97308	97308	97286	97286	97286	35745	269	2	2	2	2	2	2	2
SAL_MA5664AA	CFSAN068045	PHE	SRR6283291;ILLUMINA;Paired;500;SRX3385406;923902560;144	SAL_MA5664AA	Livestock	Swine	Mesenteric lymph node (Sus scrofa domesticus)	2005				South America	Brazil							Typhimurium	I			Food and Drug Administration - Center for Food Safety and Applied Nutrition (US)			PRJNA186035	SRP018785	SAMN08016038	SRS2680870	2017-11-13	2017-11-13	97310	97310	97310	92506	92506	35745	269	2	2	2	2	2	2	2
SAL_MA5665AA	CFSAN068046	PHE	SRR6283159;ILLUMINA;Paired;500;SRX3385274;957545446;143	SAL_MA5665AA	Livestock	Swine	Mesenteric lymph node (Sus scrofa domesticus)	2005				South America	Brazil							Typhimurium	I			Food and Drug Administration - Center for Food Safety and Applied Nutrition (US)			PRJNA186035	SRP018785	SAMN08015904	SRS2680746	2017-11-13	2017-11-13	97309	97309	97309	97309	97309	35745	269	2	2	2	2	2	2	2
SAL_MA5666AA	CFSAN068035	PHE	SRR6283069;ILLUMINA;Paired;500;SRX3385184;986954254;143	SAL_MA5666AA	Livestock	Swine	Swine urine (Sus scrofa domesticus)	2011				South America	Brazil							Typhimurium	I			Food and Drug Administration - Center for Food Safety and Applied Nutrition (US)			PRJNA186035	SRP018785	SAMN08015734	SRS2680656	2017-11-13	2017-11-13	97155	97155	97155	97155	97155	97155	269	2	2	2	2	2	2	2
SAL_MA5704AA	ERS2000928	PHE	ERR2193132;ILLUMINA;Paired;500;ERX2249155;161330330;95	SAL_MA5704AA	Human	Human	Homo sapiens; human					Europe	Ireland							Typhimurium	Subsp. I			University Hospital Galway			PRJEB18998	ERP020979	SAMEA104375950	ERS2000928	2017-11-14	2017-11-14	97204	97204	97204	97204	97204	97204	2	2	2	2	2	2	2	2
SAL_MA5711AA	ERS2000921	PHE	ERR2193125;ILLUMINA;Paired;500;ERX2249148;212176990;95	SAL_MA5711AA	Human	Human	Homo sapiens; human					Europe	Ireland							4	[5]	12:I:-	Subsp. I			University Hospital Galway			PRJEB18998	ERP020979	SAMEA104375943	ERS2000921	2017-11-14	2017-11-14	154487	96821	96821	96821	53397	2	2	2	2	2	2	2	2	2
SAL_MA5729AA	CFSAN068042	PHE	SRR6286530;ILLUMINA;Paired;500;SRX3387912;965221114;143	SAL_MA5729AA	Environment	Soil/Dust	Herd environment	2006				South America	Brazil							Typhimurium	I			Food and Drug Administration - Center for Food Safety and Applied Nutrition (US)			PRJNA186035	SRP018785	SAMN08017409	SRS2683245	2017-11-14	2017-11-13	97151	97151	97151	97151	97151	97151	269	2	2	2	2	2	2	2
SAL_MA5733AA	CFSAN068034	PHE	SRR6286518;ILLUMINA;Paired;500;SRX3387900;1160539980;141	SAL_MA5733AA	Livestock	Swine	Swine urine (Sus scrofa domesticus)	2011				South America	Brazil							Typhimurium	I			Food and Drug Administration - Center for Food Safety and Applied Nutrition (US)			PRJNA186035	SRP018785	SAMN08017375	SRS2683233	2017-11-14	2017-11-13	97155	97155	97155	97155	97155	97155	269	2	2	2	2	2	2	2
SAL_MA6026AA	WW012	PHE	GCF_002313125;Complete Genome;;;;;	SAL_MA6026AA	Livestock	Swine	Instant pork	2016				Asia	China							Typhimurium	I			National Centre for Food Safety Risk Assessment (China)			PRJNA224116		SAMN07267217		2017-11-15	2017-09-19	97031	97031	97031	97031	97031	97031	2	2	2	2	2	2	2	2
SAL_MA6669AA	PNUSAS027711	PHE	SRR6299383;ILLUMINA;Paired;;SRX3400311;548534650;235	SAL_MA6669AA								North America	United States											Centers for Disease Control and Prevention Enteric Diseases Laboratory Branch			PRJNA230403	SRP040281	SAMN07998287	SRS2694458	2017-11-17	2017-11-16	97926	97926	97926	80822	80822	3610	3610	2	2	2	2	2	2	2
SAL_MA6904AA	ADRDL-1583	PHE	SRR6311308;ILLUMINA;Paired;500;SRX3411574;563452416;216	SAL_MA6904AA	Companion animal	Canine	Canine Feces (Canis lupus familiaris)	1988	8			North America	United States							Typhimurium	I			FDA Center for Food Safety and Applied Nutrition			PRJNA280335	SRP059853	SAMN08046701	SRS2704809	2017-11-21	2017-11-21	98730	98730	98730	98730	98730	98730	3610	2	2	2	2	2	2	2
SAL_MA6978AA	CFSAN071789	PHE	SRR6310672;ILLUMINA;Paired;500;SRX3410950;316657314;239	SAL_MA6978AA	Animal feed	ND	Bone Meal Fertilizer	2016				North America	United States	Washington										FDA Center for Food Safety and Applied Nutrition			PRJNA186035	SRP018785	SAMN08040171	SRS2704177	2017-11-21	2017-11-20	98814	98814	63560	271	269	269	269	2	2	2	2	2	2	2
SAL_MA6997AA	PNUSAS027111	PHE	SRR6310651;ILLUMINA;Paired;;SRX3410929;573340756;226	SAL_MA6997AA								North America	United States											Centers for Disease Control and Prevention Enteric Diseases Laboratory Branch			PRJNA230403	SRP040281	SAMN08007589	SRS2704156	2017-11-21	2017-11-20	98454	98454	5702	6	2	2	2	2	2	2	2	2	2	2
SAL_MA7003AA	PNUSAS027115	PHE	SRR6310645;ILLUMINA;Paired;;SRX3410923;657975276;238	SAL_MA7003AA								North America	United States											Centers for Disease Control and Prevention Enteric Diseases Laboratory Branch			PRJNA230403	SRP040281	SAMN08007593	SRS2704150	2017-11-21	2017-11-20	61852	61852	271	271	269	269	269	2	2	2	2	2	2	2
SAL_MA7113AA	PNUSAS025929	PHE	SRR6310533;ILLUMINA;Paired;;SRX3410811;495956820;230	SAL_MA7113AA								North America	United States											Centers for Disease Control and Prevention Enteric Diseases Laboratory Branch			PRJNA230403	SRP040281	SAMN08001945	SRS2704037	2017-11-21	2017-11-20	98226	98226	98226	6	2	2	2	2	2	2	2	2	2	2
SAL_MA7233AA	PNUSAS027457	PHE	SRR6310366;ILLUMINA;Paired;;SRX3410644;502538130;239	SAL_MA7233AA																				Centers for Disease Control and Prevention Enteric Diseases Laboratory Branch			PRJNA230403	SRP040281	SAMN08016898	SRS2703879	2017-11-21	2017-11-20	98614	98614	98614	98614	98614	2	2	2	2	2	2	2	2	2
SAL_MA7279AA	PNUSAS028063	PHE	SRR6310319;ILLUMINA;Paired;;SRX3410597;658862400;240	SAL_MA7279AA																				Centers for Disease Control and Prevention Enteric Diseases Laboratory Branch			PRJNA230403	SRP040281	SAMN08016900	SRS2703833	2017-11-21	2017-11-20	98588	98588	36034	271	269	269	269	2	2	2	2	2	2	2
SAL_MA7408AA	FSIS11705233	PHE	SRR6308558;ILLUMINA;Paired;500;SRX3408942;181730016;144	SAL_MA7408AA	Poultry	Avian	NRTE (Not-Ready-to-Eat) Comminuted Poultry Exploratory Sampling - Turkeys	2015				North America	United States	Minnesota						4	[5]	12:I:-	I			FDA Center for Food Safety and Applied Nutrition			PRJNA242847	SRP040648	SAMN08044028	SRS2702528	2017-11-21	2017-11-20	98229	98229	98229	6	2	2	2	2	2	2	2	2	2	2
SAL_MA7681AA	FSIS11705249	PHE	SRR6308355;ILLUMINA;Paired;500;SRX3408743;224846496;147	SAL_MA7681AA	Livestock	Swine	Product-Raw-Intact-Pork	2015				North America	United States	California						4	[5]	12:I:-	I			FDA Center for Food Safety and Applied Nutrition			PRJNA242847	SRP040648	SAMN08043900	SRS2706197	2017-11-22	2017-11-21	98608	98608	98608	48976	2	2	2	2	2	2	2	2	2	2
SAL_MA7996AA	ARIMSPTA280-17	PHE	SRR6325466;ILLUMINA;Paired;500;SRX3425207;369557992;188	SAL_MA7996AA	Human	Human	blood; Homo sapiens	2017				South America	Argentina							Paratyphi A	I			FDA Center for Food Safety and Applied Nutrition			PRJNA277984	SRP071258	SAMN08102587	SRS2716834	2017-11-28	2017-11-27	99359	99359	99359	99359	35697	269	269	2	2	2	2	2	2	2
SAL_MA8007AA	PNUSAS028888	PHE	SRR6325336;ILLUMINA;Paired;;SRX3425077;561165990;231	SAL_MA8007AA				2014				North America	United States	Wyoming										Centers for Disease Control and Prevention Enteric Diseases Laboratory Branch			PRJNA230403	SRP040281	SAMN08057541	SRS2716706	2017-11-28	2017-11-27	99251	99251	99251	271	269	269	269	2	2	2	2	2	2	2
SAL_MA8014AA	Rao-AMR-11	PHE	SRR6325218;ILLUMINA;Paired;500;SRX3424968;493172664;228	SAL_MA8014AA	Human	Human	human intestinal; Homo sapiens					North America	United States							Typhimurium	I			FDA Center for Food Safety and Applied Nutrition			PRJNA280335	SRP059853	SAMN08054986	SRS2716598	2017-11-28	2017-11-27	99357	99357	99357	99357	99357	99357	3610	2	2	2	2	2	2	2
SAL_MA8016AA	ARIMST449-17	PHE	SRR6325216;ILLUMINA;Paired;500;SRX3424966;415616574;167	SAL_MA8016AA	Human	Human	biological fluid or/and tissue; Homo sapiens	2017				South America	Argentina							Typhi	I			FDA Center for Food Safety and Applied Nutrition			PRJNA277984	SRP071258	SAMN08102530	SRS2716596	2017-11-28	2017-11-27	99359	99359	99359	99359	35697	269	269	2	2	2	2	2	2	2
SAL_MA8017AA	ARIMSSD702-17	PHE	SRR6325214;ILLUMINA;Paired;500;SRX3424964;348646296;212	SAL_MA8017AA	Human	Human	stool; Homo sapiens	2017				South America	Argentina							Sandiego	I			FDA Center for Food Safety and Applied Nutrition			PRJNA277984	SRP071258	SAMN08102520	SRS2716594	2017-11-28	2017-11-27	99360	99360	99360	35621	35621	269	269	2	2	2	2	2	2	2
SAL_MA8047AA	PNUSAS028846	PHE	SRR6325180;ILLUMINA;Paired;;SRX3424930;795537774;243	SAL_MA8047AA	ND	ND						North America	United States											Centers for Disease Control and Prevention Enteric Diseases Laboratory Branch			PRJNA230403	SRP040281	SAMN08056367	SRS2716560	2017-11-28	2017-11-27	99330	99330	72602	72602	2	2	2	2	2	2	2	2	2	2
SAL_MA8190AA	PNUSAS029034	PHE	SRR6330669;ILLUMINA;Paired;;SRX3430090;329473872;238	SAL_MA8190AA								North America	United States											Centers for Disease Control and Prevention Enteric Diseases Laboratory Branch			PRJNA230403	SRP040281	SAMN08100287	SRS2721513	2017-11-30	2017-11-29	99969	99969	99969	271	269	269	269	2	2	2	2	2	2	2
SAL_MA8330AA	PNUSAS027818	PHE	SRR6327161;ILLUMINA;Paired;;SRX3426804;282542940;226	SAL_MA8330AA								North America	United States											Centers for Disease Control and Prevention Enteric Diseases Laboratory Branch			PRJNA230403	SRP040281	SAMN08024969	SRS2718317	2017-11-30	2017-11-28	88725	88725	88725	271	269	269	269	2	2	2	2	2	2	2
SAL_MA8332AA	PNUSAS027819	PHE	SRR6327159;ILLUMINA;Paired;;SRX3426802;222586948;226	SAL_MA8332AA								North America	United States											Centers for Disease Control and Prevention Enteric Diseases Laboratory Branch			PRJNA230403	SRP040281	SAMN08024970	SRS2718314	2017-11-30	2017-11-28	99785	99785	271	271	269	269	269	2	2	2	2	2	2	2
SAL_MA8446AA	PNUSAS029061	PHE	SRR6326939;ILLUMINA;Paired;;SRX3426612;513408480;240	SAL_MA8446AA								North America	United States											Centers for Disease Control and Prevention Enteric Diseases Laboratory Branch			PRJNA230403	SRP040281	SAMN08100206	SRS2718127	2017-11-30	2017-11-28	99704	99704	99704	271	269	269	269	2	2	2	2	2	2	2
SAL_MA8474AA	ERS2017960	PHE	ERR2204217;ILLUMINA;Paired;500;ERX2258591;286303644;99	SAL_MA8474AA	Human	Human	Homo sapiens; human					Europe	Ireland							4	[5]	12:I:-	Subsp. I			University Hospital Galway			PRJEB18998	ERP020979	SAMEA104400018	ERS2017960	2017-11-30	2017-11-28	99675	99675	99675	24998	2	2	2	2	2	2	2	2	2	2
SAL_MA8504AA	ERS2016344	PHE	ERR2202563;ILLUMINA;Paired;1000;ERX2256937;459016740;273	SAL_MA8504AA	Food	ND	ND					Europe	Germany							Typhimurium Monophasic	I			FEDERAL INSTITUTE FOR RISK ASSESSMENT (BFR)			PRJEB23094	ERP104827	SAMEA104398402	ERS2016344	2017-11-30	2017-11-28	99270	99270	99270	99270	2	2	2	2	2	2	2	2	2	2
SAL_MA8508AA	ERS2016340	PHE	ERR2202559;ILLUMINA;Paired;1000;ERX2256933;242785950;275	SAL_MA8508AA	Livestock	Bovine	ND					Europe	Germany							Typhimurium Monophasic	I			FEDERAL INSTITUTE FOR RISK ASSESSMENT (BFR)			PRJEB23094	ERP104827	SAMEA104398398	ERS2016340	2017-11-30	2017-11-28	99661	99661	99661	99661	78865	2	2	2	2	2	2	2	2	2
SAL_MA8518AA	ERS2016330	PHE	ERR2202549;ILLUMINA;Paired;1000;ERX2256923;196509744;279	SAL_MA8518AA	Livestock	Bovine	ND					Europe	Germany							Typhimurium	I			FEDERAL INSTITUTE FOR RISK ASSESSMENT (BFR)			PRJEB23094	ERP104827	SAMEA104398388	ERS2016330	2017-11-30	2017-11-28	99630	99630	99630	99628	99628	99613	2	2	2	2	2	2	2	2
SAL_MA8519AA	ERS2016329	PHE	ERR2202548;ILLUMINA;Paired;1000;ERX2256922;176532912;276	SAL_MA8519AA	Livestock	Bovine	ND					Europe	Germany							Typhimurium	I			FEDERAL INSTITUTE FOR RISK ASSESSMENT (BFR)			PRJEB23094	ERP104827	SAMEA104398387	ERS2016329	2017-11-30	2017-11-28	99629	99629	99629	99629	99629	99629	2	2	2	2	2	2	2	2
SAL_MA8520AA	ERS2016328	PHE	ERR2202547;ILLUMINA;Paired;1000;ERX2256921;829244892;266	SAL_MA8520AA	Livestock	Bovine	ND					Europe	Germany							Typhimurium	I			FEDERAL INSTITUTE FOR RISK ASSESSMENT (BFR)			PRJEB23094	ERP104827	SAMEA104398386	ERS2016328	2017-11-30	2017-11-28	99628	99628	99628	99628	99628	99613	2	2	2	2	2	2	2	2
SAL_MA8523AA	ERS2016325	PHE	ERR2202544;ILLUMINA;Paired;1000;ERX2256918;313843712;182	SAL_MA8523AA	Food	ND	ND					Europe	Germany							Typhimurium Monophasic	I			FEDERAL INSTITUTE FOR RISK ASSESSMENT (BFR)			PRJEB23094	ERP104827	SAMEA104398383	ERS2016325	2017-11-30	2017-11-28	99602	99602	99602	99602	99602	2	2	2	2	2	2	2	2	2
SAL_MA8541AA	ERS2016307	PHE	ERR2202526;ILLUMINA;Paired;1000;ERX2256900;337027792;232	SAL_MA8541AA	Livestock	Bovine	ND					Europe	Germany							Typhimurium	I			FEDERAL INSTITUTE FOR RISK ASSESSMENT (BFR)			PRJEB23094	ERP104827	SAMEA104398365	ERS2016307	2017-11-30	2017-11-28	99606	99606	99606	99606	99606	99606	2	2	2	2	2	2	2	2
SAL_MA8542AA	ERS2016306	PHE	ERR2202525;ILLUMINA;Paired;1000;ERX2256899;380749960;233	SAL_MA8542AA	Livestock	Bovine	ND					Europe	Germany							Typhimurium	I			FEDERAL INSTITUTE FOR RISK ASSESSMENT (BFR)			PRJEB23094	ERP104827	SAMEA104398364	ERS2016306	2017-11-30	2017-11-28	99662	99606	99606	99606	99606	99606	2	2	2	2	2	2	2	2
SAL_MA8543AA	ERS2016305	PHE	ERR2202524;ILLUMINA;Paired;1000;ERX2256898;488254192;268	SAL_MA8543AA	Livestock	Bovine	ND					Europe	Germany							Typhimurium	I			FEDERAL INSTITUTE FOR RISK ASSESSMENT (BFR)			PRJEB23094	ERP104827	SAMEA104398363	ERS2016305	2017-11-30	2017-11-28	99665	99665	99665	99665	99665	2	2	2	2	2	2	2	2	2
SAL_MA8546AA	ERS2016302	PHE	ERR2202521;ILLUMINA;Paired;1000;ERX2256895;416116580;214	SAL_MA8546AA	Livestock	Bovine	ND					Europe	Germany							Typhimurium	I			FEDERAL INSTITUTE FOR RISK ASSESSMENT (BFR)			PRJEB23094	ERP104827	SAMEA104398360	ERS2016302	2017-11-30	2017-11-28	99611	99611	99611	99575	99569	2	2	2	2	2	2	2	2	2
SAL_MA8547AA	ERS2016301	PHE	ERR2202520;ILLUMINA;Paired;1000;ERX2256894;394616390;205	SAL_MA8547AA	Livestock	Bovine	ND					Europe	Germany							Typhimurium	I			FEDERAL INSTITUTE FOR RISK ASSESSMENT (BFR)			PRJEB23094	ERP104827	SAMEA104398359	ERS2016301	2017-11-30	2017-11-28	99610	99610	99610	99610	99610	99610	2	2	2	2	2	2	2	2
SAL_MA8548AA	ERS2016300	PHE	ERR2202519;ILLUMINA;Paired;1000;ERX2256893;357434800;185	SAL_MA8548AA	Livestock	Bovine	ND					Europe	Germany							Typhimurium	I			FEDERAL INSTITUTE FOR RISK ASSESSMENT (BFR)			PRJEB23094	ERP104827	SAMEA104398358	ERS2016300	2017-11-30	2017-11-28	99569	99569	99569	99569	99569	2	2	2	2	2	2	2	2	2
SAL_MA8549AA	ERS2016299	PHE	ERR2202518;ILLUMINA;Paired;1000;ERX2256892;398789856;214	SAL_MA8549AA	Livestock	Bovine	ND					Europe	Germany							Typhimurium	I			FEDERAL INSTITUTE FOR RISK ASSESSMENT (BFR)			PRJEB23094	ERP104827	SAMEA104398357	ERS2016299	2017-11-30	2017-11-28	99570	99570	99570	99570	99570	2	2	2	2	2	2	2	2	2
SAL_MA8550AA	ERS2016298	PHE	ERR2202517;ILLUMINA;Paired;1000;ERX2256891;283237664;226	SAL_MA8550AA	Livestock	Bovine	ND					Europe	Germany							Typhimurium	I			FEDERAL INSTITUTE FOR RISK ASSESSMENT (BFR)			PRJEB23094	ERP104827	SAMEA104398356	ERS2016298	2017-11-30	2017-11-28	99572	99572	99572	99572	99572	2	2	2	2	2	2	2	2	2
SAL_MA8553AA	ERS2016295	PHE	ERR2202514;ILLUMINA;Paired;1000;ERX2256888;351558364;206	SAL_MA8553AA	Livestock	Bovine	ND					Europe	Germany							Typhimurium	I			FEDERAL INSTITUTE FOR RISK ASSESSMENT (BFR)			PRJEB23094	ERP104827	SAMEA104398353	ERS2016295	2017-11-30	2017-11-28	99575	99575	99575	99575	99569	2	2	2	2	2	2	2	2	2
SAL_MA8554AA	ERS2016294	PHE	ERR2202513;ILLUMINA;Paired;1000;ERX2256887;325910400;272	SAL_MA8554AA	Livestock	Bovine	ND					Europe	Germany							Typhimurium	I			FEDERAL INSTITUTE FOR RISK ASSESSMENT (BFR)			PRJEB23094	ERP104827	SAMEA104398352	ERS2016294	2017-11-30	2017-11-28	99613	99613	99613	99613	99613	99613	2	2	2	2	2	2	2	2
SAL_MA8557AA	ERS2016291	PHE	ERR2202510;ILLUMINA;Paired;1000;ERX2256884;322068276;222	SAL_MA8557AA	Livestock	Bovine	ND					Europe	Germany							Typhimurium	I			FEDERAL INSTITUTE FOR RISK ASSESSMENT (BFR)			PRJEB23094	ERP104827	SAMEA104398349	ERS2016291	2017-11-30	2017-11-28	99577	99577	99577	99577	99577	99577	2	2	2	2	2	2	2	2
SAL_MA8560AA	ERS2016288	PHE	ERR2202507;ILLUMINA;Paired;1000;ERX2256881;496109640;255	SAL_MA8560AA	Livestock	Bovine	ND					Europe	Germany							Typhimurium	I			FEDERAL INSTITUTE FOR RISK ASSESSMENT (BFR)			PRJEB23094	ERP104827	SAMEA104398346	ERS2016288	2017-11-30	2017-11-28	99616	99616	99616	99616	99616	2	2	2	2	2	2	2	2	2
SAL_MA8561AA	ERS2016287	PHE	ERR2202506;ILLUMINA;Paired;1000;ERX2256880;549590448;264	SAL_MA8561AA	Livestock	Bovine	ND					Europe	Germany							Typhimurium	I			FEDERAL INSTITUTE FOR RISK ASSESSMENT (BFR)			PRJEB23094	ERP104827	SAMEA104398345	ERS2016287	2017-11-30	2017-11-28	99617	99617	99617	99617	99617	2	2	2	2	2	2	2	2	2
SAL_MA8562AA	ERS2016286	PHE	ERR2202505;ILLUMINA;Paired;1000;ERX2256879;425301462;279	SAL_MA8562AA	Livestock	Bovine	ND					Europe	Germany							Typhimurium	I			FEDERAL INSTITUTE FOR RISK ASSESSMENT (BFR)			PRJEB23094	ERP104827	SAMEA104398344	ERS2016286	2017-11-30	2017-11-28	99615	99615	99615	99615	26656	2	2	2	2	2	2	2	2	2
SAL_MA8569AA	ERS2016279	PHE	ERR2202498;ILLUMINA;Paired;1000;ERX2256872;387150606;229	SAL_MA8569AA	Livestock	Bovine	ND					Europe	Germany							Typhimurium	I			FEDERAL INSTITUTE FOR RISK ASSESSMENT (BFR)			PRJEB23094	ERP104827	SAMEA104398337	ERS2016279	2017-11-30	2017-11-28	99584	99584	99584	99584	99584	2	2	2	2	2	2	2	2	2
SAL_MA8976AA	PNUSAS029100	PHE	SRR6334796;ILLUMINA;Paired;;SRX3433923;231476880;235	SAL_MA8976AA								North America	United States											Centers for Disease Control and Prevention Enteric Diseases Laboratory Branch			PRJNA230403	SRP040281	SAMN08104954	SRS2725224	2017-12-01	2017-11-30	99941	99941	99941	271	269	269	269	2	2	2	2	2	2	2
SAL_MA8979AA	PNUSAS029094	PHE	SRR6334793;ILLUMINA;Paired;;SRX3433920;347401620;197	SAL_MA8979AA								North America	United States											Centers for Disease Control and Prevention Enteric Diseases Laboratory Branch			PRJNA230403	SRP040281	SAMN08104946	SRS2725221	2017-12-01	2017-11-30	99945	99945	99945	99945	99945	3610	3610	2	2	2	2	2	2	2
SAL_MA9532AA	Salmonella_enterica_subsp_enterica_1	4	5	12:i:-_181-13	PHE	ERR2210697;ILLUMINA;Paired;300;ERX2265050;183289000;100	SAL_MA9532AA	Human	Human	Homo sapiens; Feaces	2013	7			Europe	Poland					52.2597	21.0122	1	4	5	12:I:-				National Institute of Public Health - National Institute of Hygiene			PRJEB23743	ERP105515	SAMEA104413396	ERS2031338	2017-12-05	2017-12-05	101280	101280	101280	101280	2	2	2	2	2	2	2
SAL_MA9996AA	Salmonella_enterica_subs_enterica_1	4	5	12:i:-_86-15	PHE	ERR2210657;ILLUMINA;Paired;300;ERX2265010;492037524;99	SAL_MA9996AA	Human	Human	Homo sapiens; Feaces	2015	4			Europe	Poland					52.2597	21.0122	1	4	5	12:I:-				National Institute of Public Health - National Institute of Hygiene			PRJEB23743	ERP105515	SAMEA104413356	ERS2031298	2017-12-06	2017-12-05	101166	101166	101166	101166	2	2	2	2	2	2	2
SAL_NA0461AA	FSIS11706173	PHE	SRR6356227;ILLUMINA;Paired;300;SRX3452818;318464700;150	SAL_NA0461AA	Livestock	Bovine	comminuted beef	2017				North America	United States	Texas						Typhimurium	I			United States Department of Agriculture	Food Safety and Inspection Service			PRJNA242847	SRP040648	SAMN08141463	SRS2741576	2017-12-07	2017-12-07	101802	6225	271	271	269	269	269	2	2	2	2	2	2	2
SAL_NA0619AA	PNUSAS027821	PHE	SRR6353976;ILLUMINA;Paired;;SRX3450641;324294180;210	SAL_NA0619AA								North America	United States											Centers for Disease Control and Prevention Enteric Diseases Laboratory Branch			PRJNA230403	SRP040281	SAMN08105028	SRS2739574	2017-12-07	2017-12-06	100667	100667	88725	271	269	269	269	2	2	2	2	2	2	2
SAL_NA1034AA	PNUSAS029441	PHE	SRR6371720;ILLUMINA;Paired;;SRX3467043;396535404;227	SAL_NA1034AA								North America	United States											Centers for Disease Control and Prevention Enteric Diseases Laboratory Branch			PRJNA230403	SRP040281	SAMN08153782	SRS2754817	2017-12-13	2017-12-13	101629	101629	101629	271	269	269	269	2	2	2	2	2	2	2
SAL_NA1038AA	PNUSAS029443	PHE	SRR6371714;ILLUMINA;Paired;;SRX3467037;609767400;220	SAL_NA1038AA								North America	United States											Centers for Disease Control and Prevention Enteric Diseases Laboratory Branch			PRJNA230403	SRP040281	SAMN08153784	SRS2754809	2017-12-13	2017-12-13	101633	101633	101629	271	269	269	269	2	2	2	2	2	2	2
SAL_NA1177AA	PNUSAS029500	PHE	SRR6371538;ILLUMINA;Paired;;SRX3466861;535177758;237	SAL_NA1177AA								North America	United States											Centers for Disease Control and Prevention Enteric Diseases Laboratory Branch			PRJNA230403	SRP040281	SAMN08146702	SRS2754621	2017-12-13	2017-12-13	101449	101449	101449	101449	101449	2	2	2	2	2	2	2	2	2
SAL_NA1221AA	PNUSAS029801	PHE	SRR6371474;ILLUMINA;Paired;;SRX3466797;349200756;219	SAL_NA1221AA								North America	United States											Centers for Disease Control and Prevention Enteric Diseases Laboratory Branch			PRJNA230403	SRP040281	SAMN08150370	SRS2754570	2017-12-13	2017-12-13	82198	82198	271	271	269	269	269	2	2	2	2	2	2	2
SAL_NA1325AA	PNUSAS029626	PHE	SRR6366352;ILLUMINA;Paired;;SRX3461859;512694144;216	SAL_NA1325AA								North America	United States											Centers for Disease Control and Prevention Enteric Diseases Laboratory Branch			PRJNA230403	SRP040281	SAMN08137150	SRS2750013	2017-12-14	2017-12-11	69519	69519	69519	69519	269	269	269	2	2	2	2	2	2	2
SAL_NA1814AA	PNUSAS029796	PHE	SRR6373457;ILLUMINA;Paired;;SRX3468304;324026156;227	SAL_NA1814AA								North America	United States											Centers for Disease Control and Prevention Enteric Diseases Laboratory Branch			PRJNA230403	SRP040281	SAMN08150365	SRS2756024	2017-12-15	2017-12-13	101902	82198	271	271	269	269	269	2	2	2	2	2	2	2
SAL_NA1942AA	PNUSAS029969	PHE	SRR6380781;ILLUMINA;Paired;;SRX3474808;262572140;170	SAL_NA1942AA								North America	United States											Centers for Disease Control and Prevention Enteric Diseases Laboratory Branch			PRJNA230403	SRP040281	SAMN08164133	SRS2761181	2017-12-16	2017-12-15	102396	102396	82233	271	269	269	269	2	2	2	2	2	2	2
SAL_NA2065AA	PNUSAS030117	PHE	SRR6385526;ILLUMINA;Paired;;SRX3479089;728678640;202	SAL_NA2065AA								North America	United States											Centers for Disease Control and Prevention Enteric Diseases Laboratory Branch			PRJNA230403	SRP040281	SAMN08178020	SRS2765075	2017-12-18	2017-12-18	102525	102525	91885	73729	2	2	2	2	2	2	2	2	2	2
SAL_NA2145AA	S15-0728	PHE	ERR2223953;ILLUMINA;Paired;150;ERX2277325;550632900;150	SAL_NA2145AA	Livestock	Swine		2015	1			Europe	Poland					51.9194	19.1451	I 1	4	5	12:I:-				NVRI			PRJEB23993	ERP105787	SAMEA104437676	ERS2055618	2017-12-19	2017-12-19	102976	102976	102976	102976	102976	2	2	2	2	2	2	2	2	2
SAL_NA2568AA	PNUSAS030332	PHE	SRR6396475;ILLUMINA;Paired;;SRX3489781;546135688;229	SAL_NA2568AA				2017	11			North America	United States											Centers for Disease Control and Prevention Enteric Diseases Laboratory Branch			PRJNA230403	SRP040281	SAMN08196860	SRS2773652	2017-12-20	2017-12-20	82198	82198	271	271	269	269	269	2	2	2	2	2	2	2
SAL_NA2588AA	MS170447	PHE	ERR2226230;ILLUMINA;Paired;500;ERX2279593;377123000;100	SAL_NA2588AA	Human	Human	Homo sapiens; Human	2017				Europe	Ireland							4	[5]	12:I:-	Subsp. I			University Hospital Galway			PRJEB18998	ERP020979	SAMEA104443094	ERS2061036	2017-12-20	2017-12-20	102940	102940	102940	102940	102940	9763	2	2	2	2	2	2	2	2
SAL_NA2594AA	MS170441	PHE	ERR2226224;ILLUMINA;Paired;500;ERX2279587;285604110;99	SAL_NA2594AA	Human	Human	Homo sapiens; Human	2017				Europe	Ireland							4	[5]	12:I:-	Subsp. I			University Hospital Galway			PRJEB18998	ERP020979	SAMEA104443088	ERS2061030	2017-12-20	2017-12-20	102945	102945	102945	102945	102945	102945	2	2	2	2	2	2	2	2
SAL_NA3037AA	PNUSAS029841	PHE	SRR6412952;ILLUMINA;Paired;;SRX3505967;319324752;244	SAL_NA3037AA								North America	United States											Centers for Disease Control and Prevention Enteric Diseases Laboratory Branch			PRJNA230403	SRP040281	SAMN08182870	SRS2783520	2017-12-23	2017-12-22	36034	36034	36034	271	269	269	269	2	2	2	2	2	2	2
SAL_NA3055AA	PNUSAS027628	PHE	SRR6412932;ILLUMINA;Paired;;SRX3505947;672788844;246	SAL_NA3055AA								North America	United States											Centers for Disease Control and Prevention Enteric Diseases Laboratory Branch			PRJNA230403	SRP040281	SAMN08181771	SRS2783500	2017-12-23	2017-12-22	103399	103399	103399	103399	103399	2	2	2	2	2	2	2	2	2
SAL_NA3216AA	PNUSAS026351	PHE	SRR6425479;ILLUMINA;Paired;;SRX3517742;190649176;214	SAL_NA3216AA								North America	United States											Centers for Disease Control and Prevention Enteric Diseases Laboratory Branch			PRJNA230403	SRP040281	SAMN08217249	SRS2792661	2017-12-28	2017-12-27	103595	103595	103595	103595	2	2	2	2	2	2	2	2	2	2
SAL_NA3228AA	ARIMSH361-17	PHE	SRR6425316;ILLUMINA;Paired;500;SRX3517700;301817376;168	SAL_NA3228AA	Human	Human	blood; Homo sapiens	2017				South America	Argentina							Typhimurium	I			FDA Center for Food Safety and Applied Nutrition			PRJNA277984	SRP071258	SAMN08234429	SRS2792586	2017-12-28	2017-12-27	103524	103524	99359	99359	35697	269	269	2	2	2	2	2	2	2
SAL_NA3726AA	PNUSAS030426	PHE	SRR6434064;ILLUMINA;Paired;;SRX3525648;246046976;224	SAL_NA3726AA								North America	United States											Centers for Disease Control and Prevention Enteric Diseases Laboratory Branch			PRJNA230403	SRP040281	SAMN08226114	SRS2801527	2018-01-03	2018-01-02	103793	103793	103793	271	269	269	269	2	2	2	2	2	2	2
SAL_NA3844AA	2015AM-2386	PHE	SRR6437604;ILLUMINA;Paired;;SRX3529072;678828354;239	SAL_NA3844AA								North America	United States											Centers for Disease Control and Prevention Enteric Diseases Laboratory Branch			PRJNA230403	SRP040281	SAMN08289198	SRS2804982	2018-01-04	2018-01-03	104042	104042	104042	271	269	269	269	2	2	2	2	2	2	2
SAL_NA4033AA	PNUSAS030892	PHE	SRR6440560;ILLUMINA;Paired;;SRX3531916;339575652;234	SAL_NA4033AA								North America	United States											Centers for Disease Control and Prevention Enteric Diseases Laboratory Branch			PRJNA230403	SRP040281	SAMN08286627	SRS2807366	2018-01-05	2018-01-04	104370	104370	5544	6	2	2	2	2	2	2	2	2	2	2
SAL_NA4102AA	PNUSAS031109	PHE	SRR6440472;ILLUMINA;Paired;;SRX3531840;271345830;245	SAL_NA4102AA								North America	United States											Centers for Disease Control and Prevention Enteric Diseases Laboratory Branch			PRJNA230403	SRP040281	SAMN08275873	SRS2807292	2018-01-05	2018-01-04	104296	99969	99969	271	269	269	269	2	2	2	2	2	2	2
SAL_NA4120AA	PNUSAS031095	PHE	SRR6440248;ILLUMINA;Paired;;SRX3531616;197547700;241	SAL_NA4120AA								North America	United States											Centers for Disease Control and Prevention Enteric Diseases Laboratory Branch			PRJNA230403	SRP040281	SAMN08275860	SRS2807089	2018-01-05	2018-01-04	99969	99969	99969	271	269	269	269	2	2	2	2	2	2	2
SAL_NA4320AA	PNUSAS031342	PHE	SRR6446757;ILLUMINA;Paired;;SRX3537805;599454944;233	SAL_NA4320AA								North America	United States											Centers for Disease Control and Prevention Enteric Diseases Laboratory Branch			PRJNA230403	SRP040281	SAMN08287264	SRS2813024	2018-01-06	2018-01-05	99969	99969	99969	271	269	269	269	2	2	2	2	2	2	2
SAL_NA4579AA	2014AM-2417	PHE	SRR6456808;ILLUMINA;Paired;;SRX3547409;651119392;242	SAL_NA4579AA								North America	United States											Centers for Disease Control and Prevention Enteric Diseases Laboratory Branch			PRJNA230403	SRP040281	SAMN08337268	SRS2821557	2018-01-10	2018-01-10	104608	104608	271	271	269	269	269	2	2	2	2	2	2	2
SAL_NA4663AA	PNUSAS031589	PHE	SRR6457929;ILLUMINA;Paired;;SRX3548512;395998412;233	SAL_NA4663AA								North America	United States											Centers for Disease Control and Prevention Enteric Diseases Laboratory Branch			PRJNA230403	SRP040281	SAMN08328390	SRS2822649	2018-01-11	2018-01-10	104754	104754	271	271	269	269	269	2	2	2	2	2	2	2
SAL_NA4881AA	PNUSAS030632	PHE	SRR6457576;ILLUMINA;Paired;;SRX3548169;203264400;226	SAL_NA4881AA				2017				North America	United States											Centers for Disease Control and Prevention Enteric Diseases Laboratory Branch			PRJNA230403	SRP040281	SAMN08327323	SRS2822309	2018-01-12	2018-01-10	104807	104807	70987	271	269	269	269	2	2	2	2	2	2	2
SAL_NA5664AA	TW18144	PHE	SRR6491048;ILLUMINA;Paired;500;SRX3580896;341970912;204	SAL_NA5664AA	Human	Human	stool; Homo sapiens	2014				North America	United States	Michigan						Typhimurium	I			FDA Center for Food Safety and Applied Nutrition			PRJNA368989	SRP098999	SAMN08163899	SRS2850137	2018-01-24	2018-01-23	106043	106043	106043	106043	106043	106043	3610	2	2	2	2	2	2	2
SAL_NA5687AA	PNUSAS032191	PHE	SRR6489996;ILLUMINA;Paired;;SRX3579845;276822780;247	SAL_NA5687AA								North America	United States											Centers for Disease Control and Prevention Enteric Diseases Laboratory Branch			PRJNA230403	SRP040281	SAMN08368319	SRS2849267	2018-01-24	2018-01-22	106079	106079	36034	271	269	269	269	2	2	2	2	2	2	2
SAL_NA5734AA	PNUSAS031750	PHE	SRR6489948;ILLUMINA;Paired;;SRX3579797;437115280;245	SAL_NA5734AA								North America	United States											Centers for Disease Control and Prevention Enteric Diseases Laboratory Branch			PRJNA230403	SRP040281	SAMN08376781	SRS2849219	2018-01-24	2018-01-22	106036	106036	106036	271	269	269	269	2	2	2	2	2	2	2
SAL_NA6685AA	0706R8201	PHE	traces-0GlMVJv;ILLUMINA;;;;338667028;151	SAL_NA6685AA	Human	Human		2007				Europe	Denmark							Typhimurium				M. Achtman	RDNC	M. Torpdahl (SSI	Denmark)					2018-01-25	2018-10-09	105769	105769	105769	85052	39339	39339	269	2	2	2	2	2	2	2
SAL_NA6712AA	0905R11543	PHE	traces-0Qzzrlk;ILLUMINA;;;;315114048;151	SAL_NA6712AA	Human	Human		2009				Europe	Denmark							Typhimurium				M. Achtman	U311	M. Torpdahl (SSI	Denmark)					2018-01-25	2018-10-09	105794	105794	105794	105794	105794	105794	2	2	2	2	2	2	2	2
SAL_NA6715AA	0611R7820	PHE	traces-0ESqNAt;ILLUMINA;;;;327496048;151	SAL_NA6715AA	Human	Human		2006				Europe	Denmark							Typhimurium				M. Achtman	120	M. Torpdahl (SSI	Denmark)					2018-01-25	2018-10-09	105797	105797	105797	105797	105797	2	2	2	2	2	2	2	2	2
SAL_NA6722AA	0905R11589	PHE	traces-0USDuDR;ILLUMINA;;;;;	SAL_NA6722AA	Human	Human		2009				Europe	Denmark							Typhimurium				M. Achtman	U312	M. Torpdahl (SSI	Denmark)					2018-01-25	2018-10-09	85455	85455	85054	39339	39339	39339	269	2	2	2	2	2	2	2
SAL_NA6729AA	0907R11849	PHE	traces-0sGnKwn;ILLUMINA;;;;;	SAL_NA6729AA	Human	Human		2009				Europe	Denmark							Typhimurium				M. Achtman	120	M. Torpdahl (SSI	Denmark)					2018-01-25	2018-10-09	106888	106888	106888	85161	85161	2	2	2	2	2	2	2	2	2
SAL_NA6731AA	0905R11606	PHE	traces-0SxxCwf;ILLUMINA;;;;;	SAL_NA6731AA	Human	Human		2009				Europe	Denmark							Typhimurium				M. Achtman	NT	M. Torpdahl (SSI	Denmark)					2018-01-25	2018-10-09	106886	106886	106886	106886	78415	269	269	2	2	2	2	2	2	2
SAL_NA7376AA	2015AM-3436	PHE	SRR6650805;ILLUMINA;Paired;;SRX3628393;;	SAL_NA7376AA								North America	United States											Centers for Disease Control and Prevention Enteric Diseases Laboratory Branch			PRJNA230403	SRP040281	SAMN08437433	SRS2895158	2018-01-30	2018-01-30	107550	107550	107550	271	269	269	269	2	2	2	2	2	2	2
SAL_NA7517AA	NC_SI013	PHE	SRR6635804;ILLUMINA;Paired;500;SRX3623494;;	SAL_NA7517AA	Poultry	Avian	broiler chicken	2015				South America	Brazil							Infantis	I			FDA Center for Food Safety and Applied Nutrition			PRJNA293224	SRP070120	SAMN08387032	SRS2890608	2018-01-30	2018-01-29	110354	110354	110354	110354	110354	110354	269	2	2	2	2	2	2	2
SAL_NA7538AA	NC_STy05	PHE	SRR6635768;ILLUMINA;Paired;500;SRX3623458;;	SAL_NA7538AA	Poultry	Avian	broiler chicken	2015				South America	Brazil							Typhimurium	I			FDA Center for Food Safety and Applied Nutrition			PRJNA293224	SRP070120	SAMN08386803	SRS2890571	2018-01-30	2018-01-29	107395	107395	107395	107395	97314	61201	269	2	2	2	2	2	2	2
SAL_NA7539AA	NC_STy011	PHE	SRR6635767;ILLUMINA;Paired;500;SRX3623457;;	SAL_NA7539AA	Poultry	Avian	broiler chicken	2015				South America	Brazil							Typhimurium	I			FDA Center for Food Safety and Applied Nutrition			PRJNA293224	SRP070120	SAMN08386758	SRS2890570	2018-01-30	2018-01-29	110353	110353	110353	110353	97314	61201	269	2	2	2	2	2	2	2
SAL_NA7616AA	FSIS11705318	PHE	SRR6545178;ILLUMINA;Paired;500;SRX3607075;;	SAL_NA7616AA	Livestock	Swine	Product-Raw-Ground	Comminuted or Otherwise Nonintact-Pork	2016				North America	United States	New Jersey						4	[5]	12:I:-	I			FDA Center for Food Safety and Applied Nutrition			PRJNA242847	SRP040648	SAMN08386819	SRS2874297	2018-01-30	2018-01-29	107370	107370	107370	107370	2	2	2	2	2	2	2	2	2	2
SAL_NA8154AA	2015AM-3715	PHE	SRR6656915;ILLUMINA;Paired;;SRX3634133;;	SAL_NA8154AA								North America	United States											Centers for Disease Control and Prevention Enteric Diseases Laboratory Branch			PRJNA230403	SRP040281	SAMN08445972	SRS2900708	2018-01-31	2018-01-31	107744	107744	107744	271	269	269	269	2	2	2	2	2	2	2
SAL_NA8168AA	2015AM-3674	PHE	SRR6656841;ILLUMINA;Paired;;SRX3634059;;	SAL_NA8168AA								North America	United States											Centers for Disease Control and Prevention Enteric Diseases Laboratory Branch			PRJNA230403	SRP040281	SAMN08445960	SRS2900635	2018-01-31	2018-01-31	107760	107760	107760	6	2	2	2	2	2	2	2	2	2	2
SAL_NA8366AA	PNUSAS033140	PHE	SRR6663718;ILLUMINA;Paired;;SRX3640587;;	SAL_NA8366AA								North America	United States											Centers for Disease Control and Prevention Enteric Diseases Laboratory Branch			PRJNA230403	SRP040281	SAMN08438891	SRS2906786	2018-02-06	2018-02-01	108066	108066	271	271	269	269	269	2	2	2	2	2	2	2
SAL_NA8419AA	PNUSAS032971	PHE	SRR6663593;ILLUMINA;Paired;;SRX3640462;;	SAL_NA8419AA				2018	1			North America	United States											Centers for Disease Control and Prevention Enteric Diseases Laboratory Branch			PRJNA230403	SRP040281	SAMN08437247	SRS2906661	2018-02-06	2018-02-01	82198	82198	271	271	269	269	269	2	2	2	2	2	2	2
SAL_NA8420AA	PNUSAS032743	PHE	SRR6663592;ILLUMINA;Paired;;SRX3640461;;	SAL_NA8420AA								North America	United States											Centers for Disease Control and Prevention Enteric Diseases Laboratory Branch			PRJNA230403	SRP040281	SAMN08436878	SRS2906664	2018-02-06	2018-02-01	108040	108040	108040	1891	1891	269	269	2	2	2	2	2	2	2
SAL_NA8601AA	PNUSAS033244	PHE	SRR6677343;ILLUMINA;Paired;;SRX3653857;;	SAL_NA8601AA								North America	United States											Centers for Disease Control and Prevention Enteric Diseases Laboratory Branch			PRJNA230403	SRP040281	SAMN08472130	SRS2918165	2018-02-07	2018-02-06	108612	108612	108612	108612	108612	108612	3610	2	2	2	2	2	2	2
SAL_NA9445AA	PNUSAS033265	PHE	SRR6682094;ILLUMINA;Paired;;SRX3658400;;	SAL_NA9445AA								North America	United States											Centers for Disease Control and Prevention Enteric Diseases Laboratory Branch			PRJNA230403	SRP040281	SAMN08467143	SRS2922248	2018-02-08	2018-02-07	109059	109059	109059	59471	269	269	269	2	2	2	2	2	2	2
SAL_NA9491AA	PNUSAS033529	PHE	SRR6682042;ILLUMINA;Paired;;SRX3658348;;	SAL_NA9491AA								North America	United States											Centers for Disease Control and Prevention Enteric Diseases Laboratory Branch			PRJNA230403	SRP040281	SAMN08480852	SRS2922198	2018-02-08	2018-02-07	108677	108677	108677	25116	25116	2	2	2	2	2	2	2	2	2
SAL_NA9748AA	PNUSAS033941	PHE	SRR6716016;ILLUMINA;Paired;;SRX3689399;;	SAL_NA9748AA								North America	United States											Centers for Disease Control and Prevention Enteric Diseases Laboratory Branch			PRJNA230403	SRP040281	SAMN08524715	SRS2949003	2018-02-13	2018-02-13	109455	109455	36034	271	269	269	269	2	2	2	2	2	2	2
SAL_NA9769AA	PNUSAS033102	PHE	SRR6715788;ILLUMINA;Paired;;SRX3689171;;	SAL_NA9769AA								North America	United States											Centers for Disease Control and Prevention Enteric Diseases Laboratory Branch			PRJNA230403	SRP040281	SAMN08524694	SRS2948775	2018-02-13	2018-02-13	109473	109473	271	271	269	269	269	2	2	2	2	2	2	2
SAL_NA9869AA	PNUSAS031567	PHE	SRR6715688;ILLUMINA;Paired;;SRX3689071;;	SAL_NA9869AA								North America	United States											Centers for Disease Control and Prevention Enteric Diseases Laboratory Branch			PRJNA230403	SRP040281	SAMN08440680	SRS2948675	2018-02-13	2018-02-13	109349	109349	109349	271	269	269	269	2	2	2	2	2	2	2
SAL_OA0319AA	PNUSAS032162	PHE	SRR6726307;ILLUMINA;Paired;;SRX3699395;;	SAL_OA0319AA								North America	United States											Centers for Disease Control and Prevention Enteric Diseases Laboratory Branch			PRJNA230403	SRP040281	SAMN08367494	SRS2958869	2018-02-15	2018-02-14	109621	109621	109621	109621	2	2	2	2	2	2	2	2	2	2
SAL_OA0572AA	FSIS11807536	PHE	SRR6740052;ILLUMINA;Paired;300;SRX3712984;;	SAL_OA0572AA	Livestock	Swine	animal-swine-market swine	2018				North America	United States	North Carolina						I 4	[5]	12:I:-	I			United States Department of Agriculture	Food Safety and Inspection Service			PRJNA292666	SRP062916	SAMN08554070	SRS2971479	2018-02-16	2018-02-15	109802	109802	109802	109802	2	2	2	2	2	2	2	2	2	2
SAL_OA0658AA	PNUSAS034045	PHE	SRR6729924;ILLUMINA;Paired;;SRX3702872;;	SAL_OA0658AA								North America	United States											Centers for Disease Control and Prevention Enteric Diseases Laboratory Branch			PRJNA230403	SRP040281	SAMN08543208	SRS2961389	2018-02-16	2018-02-15	109712	109712	109712	271	269	269	269	2	2	2	2	2	2	2
SAL_OA0873AA	PNUSAS033984	PHE	SRR6750589;ILLUMINA;Paired;;SRX3723219;;	SAL_OA0873AA								North America	United States											Centers for Disease Control and Prevention Enteric Diseases Laboratory Branch			PRJNA230403	SRP040281	SAMN08567745	SRS2980538	2018-02-20	2018-02-20	154319	110000	110000	110000	3610	3610	3610	2	2	2	2	2	2	2
SAL_OA1043AA	PNUSAS034283	PHE	SRR6760626;ILLUMINA;Paired;;SRX3733113;;	SAL_OA1043AA								North America	United States											Centers for Disease Control and Prevention Enteric Diseases Laboratory Branch			PRJNA230403	SRP040281	SAMN08579918	SRS2990222	2018-02-22	2018-02-21	110206	110206	110206	110206	72253	72253	269	2	2	2	2	2	2	2
SAL_OA1313AA	PNUSAS030622	PHE	SRR6766057;ILLUMINA;Paired;;SRX3737262;;	SAL_OA1313AA								North America	United States											Centers for Disease Control and Prevention Enteric Diseases Laboratory Branch			PRJNA230403	SRP040281	SAMN08584073	SRS2994120	2018-02-23	2018-02-23	110500	110500	110500	6	2	2	2	2	2	2	2	2	2	2
SAL_OA1322AA	PNUSAS034942	PHE	SRR6765888;ILLUMINA;Paired;;SRX3737093;;	SAL_OA1322AA								North America	United States											Centers for Disease Control and Prevention Enteric Diseases Laboratory Branch			PRJNA230403	SRP040281	SAMN08583857	SRS2993953	2018-02-23	2018-02-23	153515	110571	110571	1891	1891	269	269	2	2	2	2	2	2	2
SAL_OA1757AA	NC_STy07	PHE	SRR6787040;ILLUMINA;Paired;500;SRX3746324;;	SAL_OA1757AA	Poultry	Avian	broiler chicken	2015				South America	Brazil							Typhimurium	I			FDA Center for Food Safety and Applied Nutrition			PRJNA293224	SRP070120	SAMN08606818	SRS3002738	2018-02-27	2018-02-27	110787	110787	110787	110787	97314	61201	269	2	2	2	2	2	2	2
SAL_OA1763AA	NC_Sty2	PHE	SRR6786714;ILLUMINA;Paired;500;SRX3746138;;	SAL_OA1763AA	Livestock	Swine	Pig liver	2000				South America	Brazil							Typhimurium	I			FDA Center for Food Safety and Applied Nutrition			PRJNA293224	SRP070120	SAMN08606827	SRS3002551	2018-02-27	2018-02-27	110780	110780	110780	110780	110780	61201	269	2	2	2	2	2	2	2
SAL_OA2408AA	FDA00000385	PHE	SRR6805494;ILLUMINA;Paired;500;SRX3764165;;	SAL_OA2408AA	Feed	Animal Feed	pet chews	2003	2			Europe	Portugal							Typhimurium Var. O 5 - (Copenhagen)	I			FDA Center for Food Safety and Applied Nutrition			PRJNA186035	SRP018785	SAMN02843770	SRS3019082	2018-03-05	2018-03-05	111106	111106	111106	111106	84985	2	2	2	2	2	2	2	2	2
SAL_OA2751AA	430206	PHE	SRR6808662;ILLUMINA;Paired;;SRX3766876;;	SAL_OA2751AA	Human	Human	human; Homo sapiens	2017	10			Europe	United Kingdom							Typhimurium - Monophasic	I			Public Health England			PRJNA248792	SRP042645	SAMN08637913	SRS3021421	2018-03-08	2018-03-07	152402	152402	87989	87989	2	2	2	2	2	2	2	2	2	2
SAL_OA2952AA	PNUSAS034865	PHE	SRR6820761;ILLUMINA;Paired;;SRX3777606;;	SAL_OA2952AA								North America	United States											Centers for Disease Control and Prevention Enteric Diseases Laboratory Branch			PRJNA230403	SRP040281	SAMN08668104	SRS3031499	2018-03-10	2018-03-09	152685	152685	152685	576	2	2	2	2	2	2	2	2	2	2
SAL_OA4384AA	PNUSAS036300	PHE	SRR6885515;ILLUMINA;Paired;;SRX3837716;;	SAL_OA4384AA								North America	United States											Centers for Disease Control and Prevention Enteric Diseases Laboratory Branch			PRJNA230403	SRP040281	SAMN08784587	SRS3085029	2018-03-27	2018-03-23	36034	36034	36034	271	269	269	269	2	2	2	2	2	2	2
SAL_OA4444AA	PNUSAS035986	PHE	SRR6885440;ILLUMINA;Paired;;SRX3837643;;	SAL_OA4444AA								North America	United States											Centers for Disease Control and Prevention Enteric Diseases Laboratory Branch			PRJNA230403	SRP040281	SAMN08784402	SRS3084959	2018-03-27	2018-03-23	114553	114553	114553	114553	114553	90156	3610	2	2	2	2	2	2	2
SAL_OA4483AA	PNUSAS035927	PHE	SRR6885379;ILLUMINA;Paired;;SRX3837582;;	SAL_OA4483AA								North America	United States											Centers for Disease Control and Prevention Enteric Diseases Laboratory Branch			PRJNA230403	SRP040281	SAMN08784354	SRS3084899	2018-03-27	2018-03-23	61852	61852	271	271	269	269	269	2	2	2	2	2	2	2
SAL_OA4542AA	NC_STy16	PHE	SRR6881715;ILLUMINA;Paired;500;SRX3834105;;	SAL_OA4542AA	Food	Fish	mechanically recovered meat	2014				South America	Brazil							Typhimurium	I			FDA Center for Food Safety and Applied Nutrition			PRJNA293224	SRP070120	SAMN08737154	SRS3081697	2018-03-27	2018-03-22	116174	116174	116174	116174	116174	35745	269	2	2	2	2	2	2	2
SAL_OA4562AA	NC_STy12	PHE	SRR6881670;ILLUMINA;Paired;500;SRX3834060;;	SAL_OA4562AA	Livestock	Swine	Pig stomach	2013				South America	Brazil							Typhimurium	I			FDA Center for Food Safety and Applied Nutrition			PRJNA293224	SRP070120	SAMN08737219	SRS3081654	2018-03-27	2018-03-22	114276	114276	114276	114276	114276	114276	269	2	2	2	2	2	2	2
SAL_OA4563AA	NC_STy14	PHE	SRR6881669;ILLUMINA;Paired;500;SRX3834059;;	SAL_OA4563AA	Poultry	Air	salted chicken breast	2013				South America	Brazil							Typhimurium	I			FDA Center for Food Safety and Applied Nutrition			PRJNA293224	SRP070120	SAMN08737223	SRS3081653	2018-03-27	2018-03-22	114277	114277	114277	114277	114277	114277	269	2	2	2	2	2	2	2
SAL_OA4569AA	NC_STy8	PHE	SRR6881663;ILLUMINA;Paired;500;SRX3834053;;	SAL_OA4569AA	Poultry	Avian	chicken meat	2012				South America	Brazil							Typhimurium	I			FDA Center for Food Safety and Applied Nutrition			PRJNA293224	SRP070120	SAMN08737217	SRS3081648	2018-03-27	2018-03-22	114256	114256	114256	114256	114256	114256	269	2	2	2	2	2	2	2
SAL_OA4591AA	PNUSAS036926	PHE	SRR6881540;ILLUMINA;Paired;;SRX3833946;;	SAL_OA4591AA								North America	United States											Centers for Disease Control and Prevention Enteric Diseases Laboratory Branch			PRJNA230403	SRP040281	SAMN08774976	SRS3081553	2018-03-27	2018-03-22	114282	114282	109712	271	269	269	269	2	2	2	2	2	2	2
SAL_OA4596AA	PNUSAS036598	PHE	SRR6881535;ILLUMINA;Paired;;SRX3833941;;	SAL_OA4596AA								North America	United States											Centers for Disease Control and Prevention Enteric Diseases Laboratory Branch			PRJNA230403	SRP040281	SAMN08774979	SRS3081548	2018-03-27	2018-03-22	106079	106079	36034	271	269	269	269	2	2	2	2	2	2	2
SAL_OA5019AA	PNUSAS035757	PHE	SRR6880767;ILLUMINA;Paired;;SRX3833253;;	SAL_OA5019AA								North America	United States											Centers for Disease Control and Prevention Enteric Diseases Laboratory Branch			PRJNA230403	SRP040281	SAMN08774264	SRS3080914	2018-03-27	2018-03-22	113849	113849	271	271	269	269	269	2	2	2	2	2	2	2
SAL_OA5095AA	PNUSAS036052	PHE	SRR6880089;ILLUMINA;Paired;;SRX3832684;;	SAL_OA5095AA								North America	United States											Centers for Disease Control and Prevention Enteric Diseases Laboratory Branch			PRJNA230403	SRP040281	SAMN08773638	SRS3080419	2018-03-27	2018-03-22	113650	113650	113650	271	269	269	269	2	2	2	2	2	2	2
SAL_OA5381AA	PNUSAS035682	PHE	SRR6879627;ILLUMINA;Paired;;SRX3832288;;	SAL_OA5381AA								North America	United States											Centers for Disease Control and Prevention Enteric Diseases Laboratory Branch			PRJNA230403	SRP040281	SAMN08773243	SRS3080010	2018-03-27	2018-03-22	112651	112651	112651	112651	112651	76745	3610	2	2	2	2	2	2	2
SAL_OA5402AA	PNUSAS035980	PHE	SRR6879606;ILLUMINA;Paired;;SRX3832259;;	SAL_OA5402AA								North America	United States											Centers for Disease Control and Prevention Enteric Diseases Laboratory Branch			PRJNA230403	SRP040281	SAMN08773181	SRS3079989	2018-03-27	2018-03-22	112658	112658	36034	271	269	269	269	2	2	2	2	2	2	2
SAL_OA5630AA	FSIS11808309	PHE	SRR6876327;ILLUMINA;Paired;500;SRX3829381;;	SAL_OA5630AA	Livestock	Air	animal-cattle-dairy cow	2018				North America	United States	Washington						Typhimurium	I			United States Department of Agriculture	Food Safety and Inspection Service			PRJNA292666	SRP062916	SAMN08767325	SRS3077602	2018-03-27	2018-03-21	111536	111536	111536	271	269	269	269	2	2	2	2	2	2	2
SAL_OA5648AA	FSIS21821286	PHE	SRR6876270;ILLUMINA;Paired;300;SRX3829331;;	SAL_OA5648AA	Poultry	Air	Product-Raw-Ground	Comminuted or Otherwise Nonintact-Pork	2018				North America	United States	Idaho						I 4	[5]	12:I:-	I			United States Department of Agriculture	Food Safety and Inspection Service			PRJNA242847	SRP040648	SAMN08767367	SRS3077560	2018-03-27	2018-03-21	152646	112013	112013	6	2	2	2	2	2	2	2	2	2
SAL_OA5924AA	1498	PHE	SRR6868497;ILLUMINA;Paired;;SRX3822959;;	SAL_OA5924AA	Human	Human	human; Homo sapiens	2014	4			Europe	United Kingdom							Unnamed	I			Public Health England			PRJNA248792	SRP042645	SAMN08742096	SRS3072570	2018-03-27	2018-03-21	111305	111305	111305	111305	111305	111305	111305	2	2	2	2	2	2	2
SAL_OA5942AA	43918	PHE	SRR6868288;ILLUMINA;Paired;;SRX3822763;;	SAL_OA5942AA	Human	Human	human; Homo sapiens	2014	8			Europe	United Kingdom							Typhimurium	I			Public Health England			PRJNA248792	SRP042645	SAMN08741652	SRS3072392	2018-03-27	2018-03-21	111282	1679	1679	1679	1471	269	269	2	2	2	2	2	2	2
SAL_OA7278AA	PNUSAS037147	PHE	SRR6902741;ILLUMINA;Paired;;SRX3851572;;	SAL_OA7278AA								North America	United States											Centers for Disease Control and Prevention Enteric Diseases Laboratory Branch			PRJNA230403	SRP040281	SAMN08799627	SRS3095817	2018-03-27	2018-03-27	111739	111739	271	271	269	269	269	2	2	2	2	2	2	2
SAL_OA7709AA	PNUSAS037210	PHE	SRR6907939;ILLUMINA;Paired;;SRX3856123;;	SAL_OA7709AA								North America	United States											Centers for Disease Control and Prevention Enteric Diseases Laboratory Branch			PRJNA230403	SRP040281	SAMN08804407	SRS3099728	2018-03-28	2018-03-28	113434	113434	113434	271	269	269	269	2	2	2	2	2	2	2
SAL_OA7714AA	PNUSAS037209	PHE	SRR6907934;ILLUMINA;Paired;;SRX3856118;;	SAL_OA7714AA								North America	United States											Centers for Disease Control and Prevention Enteric Diseases Laboratory Branch			PRJNA230403	SRP040281	SAMN08804416	SRS3099721	2018-03-28	2018-03-28	113434	113434	113434	271	269	269	269	2	2	2	2	2	2	2
SAL_OA7720AA	PNUSAS037207	PHE	SRR6907916;ILLUMINA;Paired;;SRX3856100;;	SAL_OA7720AA								North America	United States											Centers for Disease Control and Prevention Enteric Diseases Laboratory Branch			PRJNA230403	SRP040281	SAMN08804403	SRS3099704	2018-03-28	2018-03-28	113442	113442	113434	271	269	269	269	2	2	2	2	2	2	2
SAL_OA7723AA	PNUSAS037208	PHE	SRR6907913;ILLUMINA;Paired;;SRX3856097;;	SAL_OA7723AA								North America	United States											Centers for Disease Control and Prevention Enteric Diseases Laboratory Branch			PRJNA230403	SRP040281	SAMN08804402	SRS3099701	2018-03-28	2018-03-28	113434	113434	113434	271	269	269	269	2	2	2	2	2	2	2
SAL_OA8034AA	PNUSAS036986	PHE	SRR6916430;ILLUMINA;Paired;;SRX3864070;;	SAL_OA8034AA								North America	United States											Centers for Disease Control and Prevention Enteric Diseases Laboratory Branch			PRJNA230403	SRP040281	SAMN08815147	SRS3106090	2018-03-30	2018-03-29	114836	114836	114836	271	269	269	269	2	2	2	2	2	2	2
SAL_OA9571AA	NC_SE1	PHE	SRR6926983;ILLUMINA;Paired;500;SRX3873020;;	SAL_OA9571AA	Poultry	Air	Salted chicken breast	2012				South America	Brazil							Enteritidis	I			FDA Center for Food Safety and Applied Nutrition			PRJNA293224	SRP070120	SAMN08737151	SRS3114399	2018-04-02	2018-04-02	116882	116882	114277	114277	114277	114277	269	2	2	2	2	2	2	2
SAL_OA9999AA	PNUSAS037812	PHE	SRR6940335;ILLUMINA;Paired;;SRX3884681;;	SAL_OA9999AA								North America	United States											Centers for Disease Control and Prevention Enteric Diseases Laboratory Branch			PRJNA230403	SRP040281	SAMN08865452	SRS3123890	2018-04-04	2018-04-04	113118	113118	113118	113118	113118	113118	3610	2	2	2	2	2	2	2
SAL_PA0112AA	0508T62439	PHE	traces-0BMyXQt;ILLUMINA;Paired;;;;	SAL_PA0112AA	Human	Human		2005				Europe	Denmark							Typhimurium				M. Achtman	U302	M. Torpdahl (SSI	Denmark)					2018-04-05	2018-10-09	113022	113022	113022	113022	113022	2	2	2	2	2	2	2	2	2
SAL_PA0113AA	1108F51955	PHE	traces-0TsBrQC;ILLUMINA;Paired;;;;	SAL_PA0113AA	Human	Human		2011				Europe	Denmark							Typhimurium				M. Achtman	U302	M. Torpdahl (SSI	Denmark)					2018-04-05	2018-10-09	113024	113024	113024	113024	6794	2	2	2	2	2	2	2	2	2
SAL_PA0173AA	1106T43444	PHE	traces-0EgGHMS;ILLUMINA;Paired;;;;	SAL_PA0173AA	Human	Human		2011				Europe	Denmark							Typhimurium				M. Achtman	193	M. Torpdahl (SSI	Denmark)					2018-04-05	2018-10-09	112994	112994	112994	112994	84985	2	2	2	2	2	2	2	2	2
SAL_PA0180AA	0503H13396	PHE	traces-0MeLfoz;ILLUMINA;Paired;;;;	SAL_PA0180AA	Human	Human		2005				Europe	Denmark							Typhimurium				M. Achtman	U302	M. Torpdahl (SSI	Denmark)					2018-04-05	2018-10-09	112993	112993	112993	112993	112993	269	269	2	2	2	2	2	2	2
SAL_PA0182AA	0511R7040	PHE	traces-0pcwPTf;ILLUMINA;Paired;;;;	SAL_PA0182AA	Human	Human		2005				Europe	Denmark							Typhimurium				M. Achtman	RDNC	M. Torpdahl (SSI	Denmark)					2018-04-05	2018-10-09	113003	113003	113003	113003	35745	35745	269	2	2	2	2	2	2	2
SAL_PA0253AA	1446A	PHE	SRR6943451;ILLUMINA;Paired;;SRX3887261;;	SAL_PA0253AA	Companion Animal	Swine	feces; Sus scrofa domesticus	2012	9			Europe	Ireland							Typhimurium Var. 4	[5]	12:I:-	I			Quadram Institute Bioscience			PRJNA438944	SRP137603	SAMN08734333	SRS3125722	2018-04-05	2018-04-05	117043	117043	117043	302	2	2	2	2	2	2	2	2	2	2
SAL_PA0559AA	FSIS11808930	PHE	SRR6956284;ILLUMINA;Paired;300;SRX3899289;;	SAL_PA0559AA	Livestock	Swine	animal-swine-market swine	2018				North America	United States	Illinois						I 4	[5]	12:I:-	I			United States Department of Agriculture	Food Safety and Inspection Service			PRJNA292666	SRP062916	SAMN08886776	SRS3136563	2018-04-07	2018-04-06	117169	117169	117169	117169	98614	2	2	2	2	2	2	2	2	2
SAL_PA0834AA	NC_STy08	PHE	SRR6968009;ILLUMINA;Paired;500;SRX3909867;;	SAL_PA0834AA	Poultry	Avian	broiler chicken	2015				South America	Brazil							Typhimurium	I			FDA Center for Food Safety and Applied Nutrition			PRJNA293224	SRP070120	SAMN08874450	SRS3145525	2018-04-11	2018-04-09	114517	114517	114517	114517	114517	61201	269	2	2	2	2	2	2	2
SAL_PA0903AA	NC_STy13	PHE	SRR6967887;ILLUMINA;Paired;500;SRX3909749;;	SAL_PA0903AA	Livestock	Swine	Pork	2013				South America	Brazil							Typhimurium	I			FDA Center for Food Safety and Applied Nutrition			PRJNA293224	SRP070120	SAMN08874445	SRS3145415	2018-04-11	2018-04-09	117196	117196	117196	117196	97314	61201	269	2	2	2	2	2	2	2
SAL_PA0911AA	PNUSAS035841	PHE	SRR6967811;ILLUMINA;Paired;;SRX3909684;;	SAL_PA0911AA								North America	United States											Centers for Disease Control and Prevention Enteric Diseases Laboratory Branch			PRJNA230403	SRP040281	SAMN08898437	SRS3145365	2018-04-11	2018-04-09	117766	117766	117766	71910	49543	49543	3610	2	2	2	2	2	2	2
SAL_PA0930AA	PNUSAS038017	PHE	SRR6967791;ILLUMINA;Paired;;SRX3909664;;	SAL_PA0930AA								North America	United States											Centers for Disease Control and Prevention Enteric Diseases Laboratory Branch			PRJNA230403	SRP040281	SAMN08898317	SRS3145345	2018-04-11	2018-04-09	113434	113434	113434	271	269	269	269	2	2	2	2	2	2	2
SAL_PA1074AA	4	5	12:i:-	PHE	SRR6977122;ILLUMINA;Paired;;SRX3918711;;	SAL_PA1074AA	Livestock	Swine	ND	2015	12			North America	United States	Texas				30.63	-96.33					Texas A&M University			PRJNA449363	SRP139298	SAMN08897994	SRS3153720	2018-04-12	2018-04-10	114898	114898	114898	6	2	2	2	2	2	2	2	2	2	2
SAL_PA1117AA	4	5	12:i:-	PHE	SRR6977165;ILLUMINA;Paired;;SRX3918668;;	SAL_PA1117AA	Livestock	Swine	ND	2015	12			North America	United States	Texas				30.63	-96.33					Texas A&M University			PRJNA449363	SRP139298	SAMN08897996	SRS3153677	2018-04-12	2018-04-10	114898	114898	114898	6	2	2	2	2	2	2	2	2	2	2
SAL_PA1863AA	PNUSAS038203	PHE	SRR7011013;ILLUMINA;Paired;;SRX3943482;;	SAL_PA1863AA								North America	United States											Centers for Disease Control and Prevention Enteric Diseases Laboratory Branch			PRJNA230403	SRP040281	SAMN08939301	SRS3174022	2018-04-17	2018-04-16	117187	36034	36034	271	269	269	269	2	2	2	2	2	2	2
SAL_PA2024AA	PNUSAS037850	PHE	SRR7015189;ILLUMINA;Paired;;SRX3947442;;	SAL_PA2024AA								North America	United States											Centers for Disease Control and Prevention Enteric Diseases Laboratory Branch			PRJNA230403	SRP040281	SAMN08943014	SRS3177793	2018-04-19	2018-04-17	117297	117297	117297	117297	269	269	269	2	2	2	2	2	2	2
SAL_PA2738AA	PNUSAS037468	PHE	SRR7049724;ILLUMINA;Paired;;SRX3981172;;	SAL_PA2738AA								North America	United States											Centers for Disease Control and Prevention Enteric Diseases Laboratory Branch			PRJNA230403	SRP040281	SAMN08963996	SRS3206011	2018-04-22	2018-04-20	117758	117758	117758	35609	35609	269	269	2	2	2	2	2	2	2
SAL_PA3005AA	PNUSAS039349	PHE	SRR7063331;ILLUMINA;Paired;;SRX3994219;;	SAL_PA3005AA								North America	United States											Centers for Disease Control and Prevention Enteric Diseases Laboratory Branch			PRJNA230403	SRP040281	SAMN08981725	SRS3218380	2018-04-26	2018-04-25	71910	71910	71910	71910	49543	49543	3610	2	2	2	2	2	2	2
SAL_PA3408AA	PNUSAS039153	PHE	SRR7063500;ILLUMINA;Paired;;SRX3994388;;	SAL_PA3408AA								North America	United States											Centers for Disease Control and Prevention Enteric Diseases Laboratory Branch			PRJNA230403	SRP040281	SAMN08981863	SRS3218549	2018-04-26	2018-04-25	118284	118284	118284	118284	2	2	2	2	2	2	2	2	2	2
SAL_PA3736AA	FSIS11809456	PHE	SRR7075227;ILLUMINA;Paired;300;SRX4004997;;	SAL_PA3736AA	Livestock	Bovine	comminuted beef	2018				North America	United States	California							I			United States Department of Agriculture	Food Safety and Inspection Service			PRJNA242847	SRP040648	SAMN08996031	SRS3226933	2018-04-28	2018-04-27	118659	118659	113434	271	269	269	269	2	2	2	2	2	2	2
SAL_PA3774AA	16-10-18-8100305-L	PHE	traces-0PMwAKz;ILLUMINA;Paired;;NA;;	SAL_PA3774AA				2018				Europe	United Kingdom	Scotland						Typhimurium				D. Brown (Scotland)							2018-04-30	2018-11-02	118255	118253	118253	302	2	2	2	2	2	2	2	2	2	2
SAL_PA3829AA	PNUSAS039526	PHE	SRR7082094;ILLUMINA;Paired;;SRX4011853;;	SAL_PA3829AA								North America	United States											Centers for Disease Control and Prevention Enteric Diseases Laboratory Branch			PRJNA230403	SRP040281	SAMN09001051	SRS3233419	2018-04-30	2018-04-30	118883	118883	109712	271	269	269	269	2	2	2	2	2	2	2
SAL_PA4030AA	57-2122	PHE	SRR7084742;ILLUMINA;Paired;;SRX4014451;;	SAL_PA4030AA																Typhimurium	I			University of Georgia	Food Safety Center	Dr. Deng's Lab			PRJNA453962	SRP144070	SAMN08996134	SRS3235968	2018-05-01	2018-04-30	119015	119015	119015	119015	119015	98730	3610	2	2	2	2	2	2	2
SAL_PA4245AA	467184	PHE	SRR7090722;ILLUMINA;Paired;;SRX4019616;;	SAL_PA4245AA	Human	Human	human; Homo sapiens	2018	1			Europe	United Kingdom							Typhimurium	I			Public Health England			PRJNA248792	SRP042645	SAMN09009177	SRS3240965	2018-05-02	2018-05-02	119225	119225	119225	119225	61282	269	269	2	2	2	2	2	2	2
SAL_PA4309AA	371903	PHE	SRR7090657;ILLUMINA;Paired;;SRX4019551;;	SAL_PA4309AA	Human	Human	human; Homo sapiens	2017	5			Europe	United Kingdom							Typhimurium	I			Public Health England			PRJNA248792	SRP042645	SAMN09009093	SRS3240901	2018-05-02	2018-05-02	119152	119152	119152	119152	119152	2	2	2	2	2	2	2	2	2
SAL_PA4347AA	PNUSAS039533	PHE	SRR7093308;ILLUMINA;Paired;;SRX4022158;;	SAL_PA4347AA								North America	United States											Centers for Disease Control and Prevention Enteric Diseases Laboratory Branch			PRJNA230403	SRP040281	SAMN09011616	SRS3242673	2018-05-02	2018-05-02	119367	119367	109712	271	269	269	269	2	2	2	2	2	2	2
SAL_PA4361AA	PNUSAS039532	PHE	SRR7093291;ILLUMINA;Paired;;SRX4022141;;	SAL_PA4361AA								North America	United States											Centers for Disease Control and Prevention Enteric Diseases Laboratory Branch			PRJNA230403	SRP040281	SAMN09011618	SRS3242658	2018-05-02	2018-05-02	119287	119287	109712	271	269	269	269	2	2	2	2	2	2	2
SAL_PA4416AA	PNUSAS039604	PHE	SRR7093210;ILLUMINA;Paired;;SRX4022083;;	SAL_PA4416AA								North America	United States											Centers for Disease Control and Prevention Enteric Diseases Laboratory Branch			PRJNA230403	SRP040281	SAMN09011581	SRS3242599	2018-05-02	2018-05-02	119294	119294	119294	271	269	269	269	2	2	2	2	2	2	2
SAL_PA4712AA	PNUSAS039953	PHE	SRR7105135;ILLUMINA;Paired;;SRX4033475;;	SAL_PA4712AA								North America	United States											Centers for Disease Control and Prevention Enteric Diseases Laboratory Branch			PRJNA230403	SRP040281	SAMN09044349	SRS3253035	2018-05-03	2018-05-03	119458	119458	271	271	269	269	269	2	2	2	2	2	2	2
SAL_PA4808AA	478618	PHE	SRR7108629;ILLUMINA;Paired;;SRX4036545;;	SAL_PA4808AA	Human	Human	human; Homo sapiens	2018	1			Europe	United Kingdom							Typhimurium	I			Public Health England			PRJNA248792	SRP042645	SAMN09060249	SRS3254357	2018-05-04	2018-05-04	119581	119581	119581	85463	7386	2	2	2	2	2	2	2	2	2
SAL_PA4822AA	468931	PHE	SRR7108615;ILLUMINA;Paired;;SRX4036531;;	SAL_PA4822AA	Human	Human	human; Homo sapiens	2017	12			Europe	United Kingdom							Typhimurium	I			Public Health England			PRJNA248792	SRP042645	SAMN09060246	SRS3254343	2018-05-04	2018-05-04	119545	119545	119545	119545	119545	269	269	2	2	2	2	2	2	2
SAL_PA4887AA	460487	PHE	SRR7123389;ILLUMINA;Paired;;SRX4044458;;	SAL_PA4887AA	Human	Human	human; Homo sapiens	2017	12			Europe	United Kingdom							Typhimurium	I			Public Health England			PRJNA248792	SRP042645	SAMN09077031	SRS3261876	2018-05-08	2018-05-05	119908	119908	119908	119908	119908	2	2	2	2	2	2	2	2	2
SAL_PA5041AA	CFSAN080418	PHE	SRR7121087;ILLUMINA;Paired;500;SRX4042639;;	SAL_PA5041AA	Poultry	Avian	Finished Ground Turkey	2016				North America	United States	Indiana										FDA Center for Food Safety and Applied Nutrition			PRJNA186035	SRP018785	SAMN08995227	SRS3260084	2018-05-08	2018-05-04	119740	119740	118552	6	2	2	2	2	2	2	2	2	2	2
SAL_PA5042AA	CFSAN080417	PHE	SRR7121086;ILLUMINA;Paired;500;SRX4042638;;	SAL_PA5042AA	Poultry	Avian	Ground Component Turkey	2016				North America	United States	Indiana										FDA Center for Food Safety and Applied Nutrition			PRJNA186035	SRP018785	SAMN08994161	SRS3260083	2018-05-08	2018-05-04	119742	119742	118552	6	2	2	2	2	2	2	2	2	2	2
SAL_PA5135AA	358-13	PHE	ERR2541854;ILLUMINA;Paired;;ERX2560196;;	SAL_PA5135AA	Human	Human	unidentified; Human	2013	12			Europe	Poland					52.2597	21.0122					Centre for Genomic Epidemiology	National Food Institute	Technical University of Denmark (DTU)	Denmark			PRJEB26520	ERP108512	SAMEA4625205	ERS2445878	2018-05-08	2018-05-04	119655	119655	119655	119655	2	2	2	2	2	2	2	2	2	2
SAL_PA5137AA	357-13	PHE	ERR2541852;ILLUMINA;Paired;;ERX2560194;;	SAL_PA5137AA	Human	Human	unidentified; Human	2013	12			Europe	Poland					52.2597	21.0122					Centre for Genomic Epidemiology	National Food Institute	Technical University of Denmark (DTU)	Denmark			PRJEB26518	ERP108510	SAMEA4625203	ERS2445876	2018-05-08	2018-05-04	119674	119674	119674	119674	2	2	2	2	2	2	2	2	2	2
SAL_PA5138AA	295-13	PHE	ERR2541851;ILLUMINA;Paired;;ERX2560193;;	SAL_PA5138AA	Human	Human	unidentified; Human	2013	10			Europe	Poland					52.2597	21.0122					Centre for Genomic Epidemiology	National Food Institute	Technical University of Denmark (DTU)	Denmark			PRJEB26517	ERP108509	SAMEA4625202	ERS2445875	2018-05-08	2018-05-04	119708	119708	119708	119708	2	2	2	2	2	2	2	2	2	2
SAL_PA5262AA	FSIS21821550	PHE	SRR7127923;ILLUMINA;Paired;500;SRX4048925;;	SAL_PA5262AA	Poultry	Air	Product-Raw-Ground	Comminuted or Otherwise Nonintact-Pork	2018				North America	United States	Nebraska						I 4	[5]	12:I:-	I			United States Department of Agriculture	Food Safety and Inspection Service			PRJNA242847	SRP040648	SAMN09083323	SRS3266042	2018-05-08	2018-05-07	120026	120026	49642	49642	49642	2	2	2	2	2	2	2	2
SAL_PA5538AA	FSIS11809583	PHE	SRR7138733;ILLUMINA;Paired;300;SRX4059605;;	SAL_PA5538AA	Livestock	Bovine	comminuted beef	2018				North America	United States	Michigan							I			United States Department of Agriculture	Food Safety and Inspection Service			PRJNA242847	SRP040648	SAMN09098777	SRS3276328	2018-05-09	2018-05-09	106079	106079	36034	271	269	269	269	2	2	2	2	2	2	2
SAL_PA5610AA	260010	PHE	SRR7140653;ILLUMINA;Paired;;SRX4061510;;	SAL_PA5610AA	Human	Human	human; Homo sapiens	2016	5			Europe	United Kingdom							Typhimurium	I			Public Health England			PRJNA248792	SRP042645	SAMN09100763	SRS3278097	2018-05-10	2018-05-10	120545	120545	90426	90426	90426	269	269	2	2	2	2	2	2	2
SAL_PA5653AA	PNUSAS039760	PHE	SRR7140428;ILLUMINA;Paired;;SRX4061285;;	SAL_PA5653AA								North America	United States											Centers for Disease Control and Prevention Enteric Diseases Laboratory Branch			PRJNA230403	SRP040281	SAMN09100992	SRS3278104	2018-05-10	2018-05-09	51191	51191	5702	6	2	2	2	2	2	2	2	2	2	2
SAL_PA5821AA	18-24-18-8100366-Q	PHE	traces-0CjpVMB;ILLUMINA;Paired;;NA;;	SAL_PA5821AA				2018				Europe	United Kingdom	Scotland										D. Brown (Scotland)							2018-05-11	2018-11-13	119984	119984	119984	119984	2	2	2	2	2	2	2	2	2	2
SAL_PA6279AA	PNUSAS039716	PHE	SRR7162844;ILLUMINA;Paired;;SRX4081142;;	SAL_PA6279AA								North America	United States											Centers for Disease Control and Prevention Enteric Diseases Laboratory Branch			PRJNA230403	SRP040281	SAMN09206763	SRS3298369	2018-05-15	2018-05-14	120777	120777	120777	120777	120777	88639	2	2	2	2	2	2	2	2
SAL_PA7015AA	PNUSAS039945	PHE	SRR7170408;ILLUMINA;Paired;;SRX4088338;;	SAL_PA7015AA								North America	United States											Centers for Disease Control and Prevention Enteric Diseases Laboratory Branch			PRJNA230403	SRP040281	SAMN09213297	SRS3304950	2018-05-16	2018-05-16	121157	121157	121157	121157	98614	2	2	2	2	2	2	2	2	2
SAL_PA7035AA	PNUSAS040615	PHE	SRR7170388;ILLUMINA;Paired;;SRX4088318;;	SAL_PA7035AA								North America	United States											Centers for Disease Control and Prevention Enteric Diseases Laboratory Branch			PRJNA230403	SRP040281	SAMN09213256	SRS3304929	2018-05-16	2018-05-16	121146	121146	121146	121146	121146	3610	3610	2	2	2	2	2	2	2
SAL_PA7065AA	PNUSAS040883	PHE	SRR7170358;ILLUMINA;Paired;;SRX4088288;;	SAL_PA7065AA								North America	United States											Centers for Disease Control and Prevention Enteric Diseases Laboratory Branch			PRJNA230403	SRP040281	SAMN09213219	SRS3304900	2018-05-16	2018-05-16	121115	121115	271	271	269	269	269	2	2	2	2	2	2	2
SAL_PA7120AA	FSIS11809755	PHE	SRR7171568;ILLUMINA;Paired;300;SRX4089474;;	SAL_PA7120AA	Livestock	Bovine	comminuted beef	2018				North America	United States	North Dakota	Cass County	Argusville				I 4	[5]	12:I:-	I			United States Department of Agriculture	Food Safety and Inspection Service			PRJNA242847	SRP040648	SAMN09213696	SRS3306231	2018-05-16	2018-05-16	121636	121636	121636	121636	2	2	2	2	2	2	2	2	2	2
SAL_PA7342AA	FSIS11809709	PHE	SRR7178558;ILLUMINA;Paired;300;SRX4095915;;	SAL_PA7342AA	Livestock	Bovine	animal-cattle-steer	2018				North America	United States	Washington						Typhimurium	I			United States Department of Agriculture	Food Safety and Inspection Service			PRJNA292666	SRP062916	SAMN09220811	SRS3312405	2018-05-17	2018-05-17	121638	121638	2862	271	269	269	269	2	2	2	2	2	2	2
SAL_PA7761AA	322497	PHE	SRR7184549;ILLUMINA;Paired;;SRX4101322;;	SAL_PA7761AA	Human	Human	human; Homo sapiens	2016	12			Europe	United Kingdom							Typhimurium	I			Public Health England			PRJNA248792	SRP042645	SAMN09225717	SRS3317433	2018-05-20	2018-05-19	121958	121958	61351	61351	1891	269	269	2	2	2	2	2	2	2
SAL_PA7910AA	470570	PHE	SRR7187936;ILLUMINA;Paired;;SRX4104661;;	SAL_PA7910AA	Human	Human	human; Homo sapiens	2018	1			Europe	United Kingdom							Typhimurium - Monophasic	I			Public Health England			PRJNA248792	SRP042645	SAMN09228818	SRS3320550	2018-05-21	2018-05-21	122353	122353	122353	122353	2	2	2	2	2	2	2	2	2	2
SAL_PA8070AA	389606	PHE	SRR7187073;ILLUMINA;Paired;;SRX4103833;;	SAL_PA8070AA	Human	Human	human; Homo sapiens	2017	7			Europe	United Kingdom							Typhimurium	I			Public Health England			PRJNA248792	SRP042645	SAMN09227804	SRS3319767	2018-05-21	2018-05-20	122062	122062	122062	122062	122062	2	2	2	2	2	2	2	2	2
SAL_PA8081AA	NC_STy9376066	PHE	SRR7188961;ILLUMINA;Paired;500;SRX4105685;;	SRR7221747;ILLUMINA;Paired;500;SRX4128280;;	SAL_PA8081AA	Poultry	Avian	broiler chicken	2016				South America	Brazil							Typhimurium	I			FDA Center for Food Safety and Applied Nutrition			PRJNA293224	SRP070120	SAMN09207881	SRS3321509	2018-05-21	2018-05-21	122459	122459	122459	122459	122459	110354	269	2	2	2	2	2	2	2
SAL_PA8147AA	PNUSAS040752	PHE	SRR7189197;ILLUMINA;Paired;;SRX4105921;;	SAL_PA8147AA								North America	United States											Centers for Disease Control and Prevention Enteric Diseases Laboratory Branch			PRJNA230403	SRP040281	SAMN09231658	SRS3321745	2018-05-22	2018-05-21	122453	122453	122453	6	2	2	2	2	2	2	2	2	2	2
SAL_PA8201AA	PNUSAS041072	PHE	SRR7193895;ILLUMINA;Paired;;SRX4110466;;	SAL_PA8201AA								North America	United States											Centers for Disease Control and Prevention Enteric Diseases Laboratory Branch			PRJNA230403	SRP040281	SAMN09237816	SRS3325952	2018-05-22	2018-05-22	36034	36034	36034	271	269	269	269	2	2	2	2	2	2	2
SAL_PA8232AA	PNUSAS039848	PHE	SRR7193864;ILLUMINA;Paired;;SRX4110435;;	SAL_PA8232AA								North America	United States											Centers for Disease Control and Prevention Enteric Diseases Laboratory Branch			PRJNA230403	SRP040281	SAMN09237806	SRS3325922	2018-05-22	2018-05-22	122502	122502	36034	271	269	269	269	2	2	2	2	2	2	2
SAL_PA8296AA	FSIS11809396	PHE	SRR7192737;ILLUMINA;Paired;500;SRX4109308;;	SAL_PA8296AA	Livestock	Air	animal-cattle-dairy cow	2018				North America	United States	Idaho						Typhimurium	I			United States Department of Agriculture	Food Safety and Inspection Service			PRJNA292666	SRP062916	SAMN09233761	SRS3324971	2018-05-22	2018-05-21	122243	122243	271	271	269	269	269	2	2	2	2	2	2	2
SAL_PA8495AA	323031	PHE	SRR7216067;ILLUMINA;Paired;;SRX4122978;;	SAL_PA8495AA	Human	Human	human; Homo sapiens	2016	12			Europe	United Kingdom							Typhimurium	I			Public Health England			PRJNA248792	SRP042645	SAMN09257976	SRS3337604	2018-05-25	2018-05-25	151931	151931	151931	24672	1891	269	269	2	2	2	2	2	2	2
SAL_PA8514AA	528034	PHE	SRR7216048;ILLUMINA;Paired;;SRX4122959;;	SAL_PA8514AA	Human	Human	human; Homo sapiens	2018	4			Europe	United Kingdom							Typhimurium	I			Public Health England			PRJNA248792	SRP042645	SAMN09257961	SRS3337585	2018-05-25	2018-05-25	122793	122793	122793	119225	61282	269	269	2	2	2	2	2	2	2
SAL_PA8564AA	272435	PHE	SRR7209579;ILLUMINA;Paired;;SRX4118456;;	SAL_PA8564AA	Human	Human	human; Homo sapiens	2016	7			Europe	United Kingdom							Typhimurium - Monophasic	I			Public Health England			PRJNA248792	SRP042645	SAMN09244457	SRS3333735	2018-05-25	2018-05-24	122739	122739	122739	122739	122739	2	2	2	2	2	2	2	2	2
SAL_PA9057AA	534008	PHE	SRR7221349;ILLUMINA;Paired;;SRX4127882;;	SAL_PA9057AA	Human	Human	human; Homo sapiens	2018	5			Europe	United Kingdom							Typhimurium	I			Public Health England			PRJNA248792	SRP042645	SAMN09267023	SRS3342340	2018-05-30	2018-05-26	123071	123071	123071	1891	1891	269	269	2	2	2	2	2	2	2
SAL_PA9073AA	511655	PHE	SRR7221296;ILLUMINA;Paired;;SRX4127829;;	SAL_PA9073AA	Human	Human	human; Homo sapiens	2018	3			Europe	United Kingdom							Typhimurium - Monophasic	I			Public Health England			PRJNA248792	SRP042645	SAMN09266986	SRS3342287	2018-05-30	2018-05-26	123081	123081	122397	122397	2	2	2	2	2	2	2	2	2	2
SAL_PA9094AA	NC_STy100922376	PHE	SRR7221028;ILLUMINA;Paired;500;SRX4127573;;	SAL_PA9094AA	Livestock	Swine	Swine slaughterhouse	2016				South America	Brazil							Typhimurium	I			FDA Center for Food Safety and Applied Nutrition			PRJNA293224	SRP070120	SAMN09207876	SRS3342034	2018-05-30	2018-05-25	123535	123535	123535	122459	122459	110354	269	2	2	2	2	2	2	2
SAL_PA9096AA	NC_STy280	PHE	SRR7220939;ILLUMINA;Paired;500;SRX4127484;;	SAL_PA9096AA	Food	Fish	mechanically recovered meat	2016				South America	Brazil							Typhimurium	I			FDA Center for Food Safety and Applied Nutrition			PRJNA293224	SRP070120	SAMN09207879	SRS3341945	2018-05-30	2018-05-25	123052	123052	123052	123052	114256	114256	269	2	2	2	2	2	2	2
SAL_PA9333AA	FDA00013148	PHE	SRR7217327;ILLUMINA;Paired;500;SRX4124181;;	SAL_PA9333AA	Feed	Air	Dried Ostrich Dog Treats	2018	5			Africa	South Africa											FDA Center for Food Safety and Applied Nutrition			PRJNA186035	SRP018785	SAMN09259621	SRS3338645	2018-05-30	2018-05-25	122828	122828	122828	122828	122828	122828	269	2	2	2	2	2	2	2
SAL_PA9384AA	PNUSAS040700	PHE	SRR7226936;ILLUMINA;Paired;;SRX4133412;;	SAL_PA9384AA								North America	United States											Centers for Disease Control and Prevention Enteric Diseases Laboratory Branch			PRJNA230403	SRP040281	SAMN09274010	SRS3347432	2018-05-30	2018-05-29	123100	123100	123100	271	269	269	269	2	2	2	2	2	2	2
SAL_PA9637AA	481501	PHE	SRR7237466;ILLUMINA;Paired;;SRX4143251;;	SAL_PA9637AA	Human	Human	human; Homo sapiens	2018	1			Europe	United Kingdom							Typhimurium	I			Public Health England			PRJNA248792	SRP042645	SAMN09286590	SRS3357036	2018-05-31	2018-05-31	123659	123659	123659	85463	7386	2	2	2	2	2	2	2	2	2
SAL_PA9763AA	PNUSAS041173	PHE	SRR7236045;ILLUMINA;Paired;;SRX4142350;;	SAL_PA9763AA								North America	United States											Centers for Disease Control and Prevention Enteric Diseases Laboratory Branch			PRJNA230403	SRP040281	SAMN09283955	SRS3356147	2018-05-31	2018-05-30	123575	123575	123575	6	2	2	2	2	2	2	2	2	2	2
SAL_PA9835AA	PNUSAS041970	PHE	SRR7235867;ILLUMINA;Paired;;SRX4142172;;	SAL_PA9835AA								North America	United States											Centers for Disease Control and Prevention Enteric Diseases Laboratory Branch			PRJNA230403	SRP040281	SAMN09283866	SRS3355968	2018-05-31	2018-05-30	41630	2862	2862	271	269	269	269	2	2	2	2	2	2	2
SAL_PA9885AA	PNUSAS041419	PHE	SRR7235701;ILLUMINA;Paired;;SRX4142034;;	SAL_PA9885AA								North America	United States											Centers for Disease Control and Prevention Enteric Diseases Laboratory Branch			PRJNA230403	SRP040281	SAMN09283748	SRS3355844	2018-05-31	2018-05-30	123472	123472	123472	123472	123472	123472	3610	2	2	2	2	2	2	2
SAL_PA9996AA	430341	PHE	SRR7244331;ILLUMINA;Paired;;SRX4149211;;	SAL_PA9996AA	Human	Human	human; Homo sapiens	2017	10			Europe	United Kingdom							Typhimurium	I			Public Health England			PRJNA248792	SRP042645	SAMN09290406	SRS3362798	2018-06-01	2018-06-01	123750	123750	123750	1499	1499	269	269	2	2	2	2	2	2	2
SAL_QA0006AA	PNUSAS041959	PHE	SRR7248299;ILLUMINA;Paired;;SRX4153125;;	SAL_QA0006AA								North America	United States											Centers for Disease Control and Prevention Enteric Diseases Laboratory Branch			PRJNA230403	SRP040281	SAMN09294356	SRS3366703	2018-06-01	2018-06-01	123964	119367	109712	271	269	269	269	2	2	2	2	2	2	2
SAL_QA0027AA	PNUSAS041953	PHE	SRR7248278;ILLUMINA;Paired;;SRX4153104;;	SAL_QA0027AA								North America	United States											Centers for Disease Control and Prevention Enteric Diseases Laboratory Branch			PRJNA230403	SRP040281	SAMN09294362	SRS3366682	2018-06-01	2018-06-01	119367	119367	109712	271	269	269	269	2	2	2	2	2	2	2
SAL_QA0100AA	PNUSAS041770	PHE	SRR7246299;ILLUMINA;Paired;;SRX4151125;;	SAL_QA0100AA								North America	United States											Centers for Disease Control and Prevention Enteric Diseases Laboratory Branch			PRJNA230403	SRP040281	SAMN09294231	SRS3364691	2018-06-01	2018-06-01	123870	123870	123870	123870	123870	3610	3610	2	2	2	2	2	2	2
SAL_QA0311AA	484677	PHE	SRR7249843;ILLUMINA;Paired;;SRX4154568;;	SAL_QA0311AA	Human	Human	human; Homo sapiens	2018	2			Europe	United Kingdom							Typhimurium	I			Public Health England			PRJNA248792	SRP042645	SAMN09295179	SRS3367802	2018-06-03	2018-06-02	123999	123999	119908	119908	119908	2	2	2	2	2	2	2	2	2
SAL_QA0333AA	238373	PHE	SRR7249820;ILLUMINA;Paired;;SRX4154545;;	SAL_QA0333AA	Human	Human	human; Homo sapiens	2016	3			Europe	United Kingdom							Typhimurium	I			Public Health England			PRJNA248792	SRP042645	SAMN09295155	SRS3367779	2018-06-03	2018-06-02	123977	123977	123977	123977	82459	82459	2	2	2	2	2	2	2	2
SAL_QA0381AA	315179	PHE	SRR7251571;ILLUMINA;Paired;;SRX4156297;;	SAL_QA0381AA	Human	Human	human; Homo sapiens	2016	11			Europe	United Kingdom							Typhimurium - Monophasic	I			Public Health England			PRJNA248792	SRP042645	SAMN09302542	SRS3369361	2018-06-04	2018-06-04	124198	124198	124198	124198	2	2	2	2	2	2	2	2	2	2
SAL_QA0661AA	491028	PHE	SRR7257484;ILLUMINA;Paired;;SRX4161799;;	SAL_QA0661AA	Human	Human	human; Homo sapiens	2018	2			Europe	United Kingdom							Typhimurium	I			Public Health England			PRJNA248792	SRP042645	SAMN09352487	SRS3374164	2018-06-05	2018-06-05	124842	124842	119581	85463	7386	2	2	2	2	2	2	2	2	2
SAL_QA0754AA	PNUSAS042240	PHE	SRR7263184;ILLUMINA;Paired;;SRX4167332;;	SAL_QA0754AA								North America	United States											Centers for Disease Control and Prevention Enteric Diseases Laboratory Branch			PRJNA230403	SRP040281	SAMN09361644	SRS3379413	2018-06-08	2018-06-05	124527	119367	109712	271	269	269	269	2	2	2	2	2	2	2
SAL_QA0811AA	PNUSAS041613	PHE	SRR7263066;ILLUMINA;Paired;;SRX4167232;;	SAL_QA0811AA								North America	United States											Centers for Disease Control and Prevention Enteric Diseases Laboratory Branch			PRJNA230403	SRP040281	SAMN09360300	SRS3379314	2018-06-08	2018-06-05	124460	124460	124460	271	269	269	269	2	2	2	2	2	2	2
SAL_QA0879AA	356322	PHE	SRR7274969;ILLUMINA;Paired;;SRX4178576;;	SAL_QA0879AA	Human	Human	human; Homo sapiens	2017	3			Europe	United Kingdom							Typhimurium	I			Public Health England			PRJNA248792	SRP042645	SAMN09376985	SRS3390192	2018-06-08	2018-06-07	124963	124963	124963	124963	124963	2	2	2	2	2	2	2	2	2
SAL_QA0934AA	PNUSAS041842	PHE	SRR7269473;ILLUMINA;Paired;;SRX4173131;;	SAL_QA0934AA								North America	United States											Centers for Disease Control and Prevention Enteric Diseases Laboratory Branch			PRJNA230403	SRP040281	SAMN09375008	SRS3384759	2018-06-08	2018-06-06	124925	124925	124925	124925	27077	2	2	2	2	2	2	2	2	2
SAL_QA1399AA	ADRDL-1911	PHE	SRR7278738;ILLUMINA;Paired;500;SRX4182321;;	SAL_QA1399AA	Livestock	Swine	Porcine Intestine (Sus scrofa domesticus)	2018	4			North America	United States	Minnesota										FDA Center for Food Safety and Applied Nutrition			PRJNA280335	SRP059853	SAMN09005282	SRS3393822	2018-06-08	2018-06-07	125213	94604	6	6	2	2	2	2	2	2	2	2	2	2
SAL_QA1562AA	PNUSAS042795	PHE	SRR7280327;ILLUMINA;Paired;;SRX4183901;;	SAL_QA1562AA								North America	United States											Centers for Disease Control and Prevention Enteric Diseases Laboratory Branch			PRJNA230403	SRP040281	SAMN09381949	SRS3395297	2018-06-08	2018-06-08	119367	119367	109712	271	269	269	269	2	2	2	2	2	2	2
SAL_QA1634AA	PNUSAS042230	PHE	SRR7280134;ILLUMINA;Paired;;SRX4183708;;	SAL_QA1634AA								North America	United States											Centers for Disease Control and Prevention Enteric Diseases Laboratory Branch			PRJNA230403	SRP040281	SAMN09381875	SRS3395104	2018-06-08	2018-06-08	125103	125103	125103	125103	125103	125103	3610	2	2	2	2	2	2	2
SAL_QA1663AA	UFRGS-SA005	PHE	SRR7284824;ILLUMINA;Paired;500;SRX4188364;;	SAL_QA1663AA	Livestock	Swine	Carcasses (Swine)	2014				South America	Brazil								I			FDA Center for Food Safety and Applied Nutrition			PRJNA183850	SRP028607	SAMN08386810	SRS3399620	2018-06-10	2018-06-09	125423	125423	125423	125423	125423	125423	269	2	2	2	2	2	2	2
SAL_QA1682AA	RS-SF09692/13	PHE	SRR7284708;ILLUMINA;Paired;500;SRX4188248;;	SAL_QA1682AA	Food	Plant	Pastry	2013				South America	Brazil							Typhimurium	I			FDA Center for Food Safety and Applied Nutrition			PRJNA183850	SRP028607	SAMN08387180	SRS3399597	2018-06-10	2018-06-08	125427	125427	125427	125427	125427	269	269	2	2	2	2	2	2	2
SAL_QA1683AA	UFRGS-SA032	PHE	SRR7284695;ILLUMINA;Paired;500;SRX4188235;;	SAL_QA1683AA	Companion Animal	Air	Fresh Sausage Production	2002				South America	Brazil							Typhimurium	I			FDA Center for Food Safety and Applied Nutrition			PRJNA183850	SRP028607	SAMN08386741	SRS3399595	2018-06-10	2018-06-08	125430	125430	125430	125430	125430	125430	269	2	2	2	2	2	2	2
SAL_QA1691AA	UFRGS-SA042	PHE	SRR7284659;ILLUMINA;Paired;500;SRX4188199;;	SAL_QA1691AA	Livestock	Swine	Carcasses (Swine)	2009				South America	Brazil							Typhimurium	I			FDA Center for Food Safety and Applied Nutrition			PRJNA183850	SRP028607	SAMN08386776	SRS3399571	2018-06-10	2018-06-08	125445	125445	125445	125445	125445	35745	269	2	2	2	2	2	2	2
SAL_QA1694AA	UFRGS-SA047	PHE	SRR7284655;ILLUMINA;Paired;500;SRX4188195;;	SAL_QA1694AA	Livestock	Swine	Carcasses (Swine)	2011				South America	Brazil							Typhimurium	I			FDA Center for Food Safety and Applied Nutrition			PRJNA183850	SRP028607	SAMN08387049	SRS3399567	2018-06-10	2018-06-08	125408	125408	125408	125408	125408	125408	269	2	2	2	2	2	2	2
SAL_QA1858AA	301671	PHE	SRR7284344;ILLUMINA;Paired;;SRX4187884;;	SAL_QA1858AA	Human	Human	human; Homo sapiens	2016	9			Europe	United Kingdom							Typhimurium	I			Public Health England			PRJNA248792	SRP042645	SAMN09386426	SRS3399258	2018-06-10	2018-06-09	125269	125269	1471	1471	1471	269	269	2	2	2	2	2	2	2
SAL_QA1890AA	435337	PHE	SRR7284311;ILLUMINA;Paired;;SRX4187851;;	SAL_QA1890AA	Human	Human	human; Homo sapiens	2017	10			Europe	United Kingdom							Typhimurium	I			Public Health England			PRJNA248792	SRP042645	SAMN09386323	SRS3399225	2018-06-10	2018-06-09	125257	125257	1891	1891	1891	269	269	2	2	2	2	2	2	2
SAL_QA1910AA	310208	PHE	SRR7284290;ILLUMINA;Paired;;SRX4187830;;	SAL_QA1910AA	Human	Human	human; Homo sapiens	2016	10			Europe	United Kingdom							Typhimurium	I			Public Health England			PRJNA248792	SRP042645	SAMN09386292	SRS3399204	2018-06-10	2018-06-09	125251	125251	125251	125251	125251	125251	2	2	2	2	2	2	2	2
SAL_QA2097AA	412063	PHE	SRR7286858;ILLUMINA;Paired;;SRX4190398;;	SAL_QA2097AA	Human	Human	human; Homo sapiens	2017	8			Europe	United Kingdom							Typhimurium	I			Public Health England			PRJNA248792	SRP042645	SAMN09388838	SRS3401624	2018-06-11	2018-06-11	125806	125806	125806	1891	1891	269	269	2	2	2	2	2	2	2
SAL_QA2117AA	312834	PHE	SRR7286838;ILLUMINA;Paired;;SRX4190378;;	SAL_QA2117AA	Human	Human	human; Homo sapiens	2016	10			Europe	United Kingdom							Typhimurium	I			Public Health England			PRJNA248792	SRP042645	SAMN09388826	SRS3401604	2018-06-11	2018-06-11	125758	125758	125758	125758	125758	125758	3610	2	2	2	2	2	2	2
SAL_QA2268AA	541362	PHE	SRR7286627;ILLUMINA;Paired;;SRX4190167;;	SAL_QA2268AA	Human	Human	human; Homo sapiens	2018	5			Europe	United Kingdom							Typhimurium	I			Public Health England			PRJNA248792	SRP042645	SAMN09388635	SRS3401394	2018-06-11	2018-06-11	125629	125629	125629	125629	399	2	2	2	2	2	2	2	2	2
SAL_QA2305AA	296848	PHE	SRR7285905;ILLUMINA;Paired;;SRX4189445;;	SAL_QA2305AA	Human	Human	human; Homo sapiens	2016	9			Europe	United Kingdom							Typhimurium	I			Public Health England			PRJNA248792	SRP042645	SAMN09388066	SRS3400686	2018-06-11	2018-06-10	125610	125610	125610	1471	1471	269	269	2	2	2	2	2	2	2
SAL_QA2365AA	291844	PHE	SRR7285845;ILLUMINA;Paired;;SRX4189385;;	SAL_QA2365AA	Human	Human	human; Homo sapiens	2016	8			Europe	United Kingdom							Typhimurium	I			Public Health England			PRJNA248792	SRP042645	SAMN09387975	SRS3400626	2018-06-11	2018-06-10	125586	125586	21289	21289	21289	21289	269	2	2	2	2	2	2	2
SAL_QA2371AA	461171	PHE	SRR7285839;ILLUMINA;Paired;;SRX4189379;;	SAL_QA2371AA	Human	Human	human; Homo sapiens	2017	12			Europe	United Kingdom							Typhimurium	I			Public Health England			PRJNA248792	SRP042645	SAMN09387978	SRS3400620	2018-06-11	2018-06-10	125574	125574	119225	119225	61282	269	269	2	2	2	2	2	2	2
SAL_QA2378AA	454892	PHE	SRR7285832;ILLUMINA;Paired;;SRX4189372;;	SAL_QA2378AA	Human	Human	human; Homo sapiens	2017	12			Europe	United Kingdom							Typhimurium	I			Public Health England			PRJNA248792	SRP042645	SAMN09387967	SRS3400613	2018-06-11	2018-06-10	125553	125553	119225	119225	61282	269	269	2	2	2	2	2	2	2
SAL_QA2436AA	265307	PHE	SRR7285774;ILLUMINA;Paired;;SRX4189314;;	SAL_QA2436AA	Human	Human	human; Homo sapiens	2016	6			Europe	United Kingdom							Typhimurium	I			Public Health England			PRJNA248792	SRP042645	SAMN09387911	SRS3400553	2018-06-11	2018-06-10	125539	125539	125539	125539	125539	125539	269	2	2	2	2	2	2	2
SAL_QA2465AA	458536	PHE	SRR7285744;ILLUMINA;Paired;;SRX4189284;;	SAL_QA2465AA	Human	Human	human; Homo sapiens	2017	12			Europe	United Kingdom							Typhimurium - Monophasic	I			Public Health England			PRJNA248792	SRP042645	SAMN09387886	SRS3400525	2018-06-11	2018-06-10	125496	125496	125496	60283	2	2	2	2	2	2	2	2	2	2
SAL_QA2510AA	462577	PHE	SRR7285622;ILLUMINA;Paired;;SRX4189162;;	SAL_QA2510AA	Human	Human	human; Homo sapiens	2017	12			Europe	United Kingdom							Typhimurium	I			Public Health England			PRJNA248792	SRP042645	SAMN09387768	SRS3400403	2018-06-11	2018-06-10	125450	125450	125450	125450	125450	2	2	2	2	2	2	2	2	2
SAL_QA2772AA	457314	PHE	SRR7292869;ILLUMINA;Paired;;SRX4195531;;	SAL_QA2772AA	Human	Human	human; Homo sapiens	2017	12			Europe	United Kingdom							Typhimurium	I			Public Health England			PRJNA248792	SRP042645	SAMN09396858	SRS3406284	2018-06-12	2018-06-12	125574	125574	119225	119225	61282	269	269	2	2	2	2	2	2	2
SAL_QA2805AA	348756	PHE	SRR7292797;ILLUMINA;Paired;;SRX4195459;;	SAL_QA2805AA	Human	Human	human; Homo sapiens	2017	2			Europe	United Kingdom							Typhimurium	I			Public Health England			PRJNA248792	SRP042645	SAMN09396828	SRS3406252	2018-06-12	2018-06-12	126130	126130	126130	126130	126130	49543	3610	2	2	2	2	2	2	2
SAL_QA2856AA	373148	PHE	SRR7292695;ILLUMINA;Paired;;SRX4195357;;	SAL_QA2856AA	Human	Human	human; Homo sapiens	2017	5			Europe	United Kingdom							Typhimurium	I			Public Health England			PRJNA248792	SRP042645	SAMN09396686	SRS3406160	2018-06-12	2018-06-12	126054	126054	119152	119152	119152	2	2	2	2	2	2	2	2	2
SAL_QA2873AA	260007	PHE	SRR7292678;ILLUMINA;Paired;;SRX4195340;;	SAL_QA2873AA	Human	Human	human; Homo sapiens	2016	5			Europe	United Kingdom							Typhimurium	I			Public Health England			PRJNA248792	SRP042645	SAMN09396680	SRS3406143	2018-06-12	2018-06-12	126066	126066	126066	126066	126066	126066	2	2	2	2	2	2	2	2
SAL_QA2956AA	404749	PHE	SRR7291935;ILLUMINA;Paired;;SRX4194673;;	SAL_QA2956AA	Human	Human	human; Homo sapiens	2017	7			Europe	United Kingdom							Typhimurium - Monophasic	I			Public Health England			PRJNA248792	SRP042645	SAMN09396560	SRS3405483	2018-06-12	2018-06-12	125984	125984	125984	125984	125984	2	2	2	2	2	2	2	2	2
SAL_QA3043AA	PNUSAS043081	PHE	SRR7294529;ILLUMINA;Paired;;SRX4197148;;	SAL_QA3043AA								North America	United States											Centers for Disease Control and Prevention Enteric Diseases Laboratory Branch			PRJNA230403	SRP040281	SAMN09400507	SRS3407764	2018-06-13	2018-06-12	126331	126331	114836	271	269	269	269	2	2	2	2	2	2	2
SAL_QA3046AA	PNUSAS042741	PHE	SRR7294526;ILLUMINA;Paired;;SRX4197145;;	SAL_QA3046AA								North America	United States											Centers for Disease Control and Prevention Enteric Diseases Laboratory Branch			PRJNA230403	SRP040281	SAMN09400541	SRS3407760	2018-06-13	2018-06-12	126333	126333	114836	271	269	269	269	2	2	2	2	2	2	2
SAL_QA3067AA	PNUSAS042740	PHE	SRR7294505;ILLUMINA;Paired;;SRX4197124;;	SAL_QA3067AA								North America	United States											Centers for Disease Control and Prevention Enteric Diseases Laboratory Branch			PRJNA230403	SRP040281	SAMN09399762	SRS3407739	2018-06-13	2018-06-12	126351	126351	114836	271	269	269	269	2	2	2	2	2	2	2
SAL_QA3072AA	PNUSAS042526	PHE	SRR7294500;ILLUMINA;Paired;;SRX4197119;;	SAL_QA3072AA								North America	United States											Centers for Disease Control and Prevention Enteric Diseases Laboratory Branch			PRJNA230403	SRP040281	SAMN09399767	SRS3407735	2018-06-13	2018-06-12	127796	126333	114836	271	269	269	269	2	2	2	2	2	2	2
SAL_QA3233AA	330509	PHE	SRR7299094;ILLUMINA;Paired;;SRX4201528;;	SAL_QA3233AA	Human	Human	human; Homo sapiens	2017	1			Europe	United Kingdom							Typhimurium - Monophasic	I			Public Health England			PRJNA248792	SRP042645	SAMN09404405	SRS3411762	2018-06-13	2018-06-13	127959	127959	127959	302	2	2	2	2	2	2	2	2	2	2
SAL_QA3333AA	484691	PHE	SRR7298409;ILLUMINA;Paired;;SRX4200843;;	SAL_QA3333AA	Human	Human	human; Homo sapiens	2018	2			Europe	United Kingdom							Typhimurium - Monophasic	I			Public Health England			PRJNA248792	SRP042645	SAMN09404323	SRS3411077	2018-06-13	2018-06-13	126468	126468	25771	25771	25771	2	2	2	2	2	2	2	2	2
SAL_QA3430AA	315628	PHE	SRR7297959;ILLUMINA;Paired;;SRX4200493;;	SAL_QA3430AA	Human	Human	human; Homo sapiens	2016	11			Europe	United Kingdom							Typhimurium	I			Public Health England			PRJNA248792	SRP042645	SAMN09403945	SRS3410727	2018-06-13	2018-06-13	126522	126522	126522	1471	1471	269	269	2	2	2	2	2	2	2
SAL_QA3461AA	302623	PHE	SRR7297928;ILLUMINA;Paired;;SRX4200462;;	SAL_QA3461AA	Human	Human	human; Homo sapiens	2016	9			Europe	United Kingdom							Typhimurium	I			Public Health England			PRJNA248792	SRP042645	SAMN09403912	SRS3410696	2018-06-13	2018-06-13	127825	127825	127825	127825	127825	127825	127825	2	2	2	2	2	2	2
SAL_QA3764AA	24-22-17-8100833-S	PHE	traces-0cjjgws;ILLUMINA;Paired;;NA;;	SAL_QA3764AA								Europe	United Kingdom	Scotland										D. Brown (Scotland)							2018-06-14	2018-12-17	124344	124344	124344	124344	124344	2	2	2	2	2	2	2	2	2
SAL_QA3926AA	458085	PHE	SRR7310334;ILLUMINA;Paired;;SRX4212678;;	SAL_QA3926AA	Human	Human	human; Homo sapiens	2017	12			Europe	United Kingdom							Typhimurium	I			Public Health England			PRJNA248792	SRP042645	SAMN09409324	SRS3415397	2018-06-14	2018-06-14	126824	126824	126824	126824	126824	126824	269	2	2	2	2	2	2	2
SAL_QA3990AA	285535	PHE	SRR7344873;ILLUMINA;Paired;;SRX4218298;;	SAL_QA3990AA	Human	Human	human; Homo sapiens	2016	8			Europe	United Kingdom							Typhimurium	I			Public Health England			PRJNA248792	SRP042645	SAMN09427362	SRS3419480	2018-06-15	2018-06-15	127131	127131	127131	127131	127131	127131	2	2	2	2	2	2	2	2
SAL_QA4142AA	459965	PHE	SRR7343677;ILLUMINA;Paired;;SRX4217159;;	SAL_QA4142AA	Human	Human	human; Homo sapiens	2017	12			Europe	United Kingdom							Typhimurium	I			Public Health England			PRJNA248792	SRP042645	SAMN09426429	SRS3418487	2018-06-15	2018-06-15	127031	127031	127031	1471	1471	269	269	2	2	2	2	2	2	2
SAL_QA4240AA	PNUSAS040133	PHE	SRR7346700;ILLUMINA;Paired;;SRX4220109;;	SAL_QA4240AA								North America	United States											Centers for Disease Control and Prevention Enteric Diseases Laboratory Branch			PRJNA230403	SRP040281	SAMN09429245	SRS3421155	2018-06-15	2018-06-15	127289	127289	127289	72253	72253	72253	269	2	2	2	2	2	2	2
SAL_QA4262AA	PNUSAS039989	PHE	SRR7346678;ILLUMINA;Paired;;SRX4220087;;	SAL_QA4262AA								North America	United States											Centers for Disease Control and Prevention Enteric Diseases Laboratory Branch			PRJNA230403	SRP040281	SAMN09429205	SRS3421133	2018-06-15	2018-06-15	127268	124230	117868	6	2	2	2	2	2	2	2	2	2	2
SAL_QA4508AA	PNUSAS034960	PHE	SRR7348242;ILLUMINA;Paired;;SRX4221623;;	SAL_QA4508AA								North America	United States											Centers for Disease Control and Prevention Enteric Diseases Laboratory Branch			PRJNA230403	SRP040281	SAMN09430490	SRS3422297	2018-06-15	2018-06-15	127388	78214	78214	6	2	2	2	2	2	2	2	2	2	2
SAL_QA4702AA	539152	PHE	SRR7349343;ILLUMINA;Paired;;SRX4222704;;	SAL_QA4702AA	Human	Human	human; Homo sapiens	2018	5			Europe	United Kingdom							Typhimurium	I			Public Health England			PRJNA248792	SRP042645	SAMN09431713	SRS3423166	2018-06-17	2018-06-16	128895	128895	128895	128895	20184	2	2	2	2	2	2	2	2	2
SAL_QA4798AA	304440	PHE	SRR7349246;ILLUMINA;Paired;;SRX4222607;;	SAL_QA4798AA	Human	Human	human; Homo sapiens	2016	9			Europe	United Kingdom							Typhimurium	I			Public Health England			PRJNA248792	SRP042645	SAMN09431429	SRS3423069	2018-06-17	2018-06-16	127679	127679	127679	127679	127679	127679	25390	2	2	2	2	2	2	2
SAL_QA4818AA	298987	PHE	SRR7349225;ILLUMINA;Paired;;SRX4222586;;	SAL_QA4818AA	Human	Human	human; Homo sapiens	2016	9			Europe	United Kingdom							Typhimurium	I			Public Health England			PRJNA248792	SRP042645	SAMN09431397	SRS3423046	2018-06-17	2018-06-16	127690	127690	73721	1891	1891	269	269	2	2	2	2	2	2	2
SAL_QA4890AA	528509	PHE	SRR7349135;ILLUMINA;Paired;;SRX4222506;;	SAL_QA4890AA	Human	Human	human; Homo sapiens	2018	4			Europe	United Kingdom							Typhimurium	I			Public Health England			PRJNA248792	SRP042645	SAMN09431325	SRS3422968	2018-06-17	2018-06-16	127636	127636	127636	127636	127636	43444	2	2	2	2	2	2	2	2
SAL_QA4928AA	553837	PHE	SRR7348938;ILLUMINA;Paired;;SRX4222309;;	SAL_QA4928AA	Human	Human	human; Homo sapiens	2018	5			Europe	United Kingdom							Typhimurium	I			Public Health England			PRJNA248792	SRP042645	SAMN09431287	SRS3422771	2018-06-17	2018-06-16	127634	127634	127634	125629	399	2	2	2	2	2	2	2	2	2
SAL_QA4956AA	461175	PHE	SRR7348718;ILLUMINA;Paired;;SRX4222089;;	SAL_QA4956AA	Human	Human	human; Homo sapiens	2017	12			Europe	United Kingdom							Typhimurium	I			Public Health England			PRJNA248792	SRP042645	SAMN09431236	SRS3422743	2018-06-17	2018-06-16	127586	127586	119225	119225	61282	269	269	2	2	2	2	2	2	2
SAL_QA5027AA	371836	PHE	SRR7351586;ILLUMINA;Paired;;SRX4224809;;	SAL_QA5027AA	Human	Human	human; Homo sapiens	2017	5			Europe	United Kingdom							Typhimurium	I			Public Health England			PRJNA248792	SRP042645	SAMN09435069	SRS3424886	2018-06-18	2018-06-18	126054	126054	119152	119152	119152	2	2	2	2	2	2	2	2	2
SAL_QA5296AA	278640	PHE	SRR7350869;ILLUMINA;Paired;;SRX4224188;;	SAL_QA5296AA	Human	Human	human; Homo sapiens	2016	7			Europe	United Kingdom							Typhimurium	I			Public Health England			PRJNA248792	SRP042645	SAMN09433812	SRS3424321	2018-06-18	2018-06-17	152173	152173	152173	152173	20732	2	2	2	2	2	2	2	2	2
SAL_QA5704AA	PNUSAS043329	PHE	SRR7353024;ILLUMINA;Paired;;SRX4226163;;	SAL_QA5704AA								North America	United States											Centers for Disease Control and Prevention Enteric Diseases Laboratory Branch			PRJNA230403	SRP040281	SAMN09438200	SRS3425309	2018-06-19	2018-06-18	128297	128297	119294	271	269	269	269	2	2	2	2	2	2	2
SAL_QA5818AA	534789	PHE	SRR7359064;ILLUMINA;Paired;;SRX4232136;;	SAL_QA5818AA	Human	Human	human; Homo sapiens	2018	5			Europe	United Kingdom							Typhimurium	I			Public Health England			PRJNA248792	SRP042645	SAMN09444817	SRS3430777	2018-06-19	2018-06-19	128510	128510	123071	1891	1891	269	269	2	2	2	2	2	2	2
SAL_QA5841AA	362099	PHE	SRR7359041;ILLUMINA;Paired;;SRX4232113;;	SAL_QA5841AA	Human	Human	human; Homo sapiens	2017	4			Europe	United Kingdom							Typhimurium - Monophasic	I			Public Health England			PRJNA248792	SRP042645	SAMN09445441	SRS3430752	2018-06-19	2018-06-19	128482	128482	128482	128482	2	2	2	2	2	2	2	2	2	2
SAL_QA6218AA	365369	PHE	SRR7368932;ILLUMINA;Paired;;SRX4241876;;	SAL_QA6218AA	Human	Human	human; Homo sapiens	2017	4			Europe	United Kingdom							Typhimurium - Monophasic	I			Public Health England			PRJNA248792	SRP042645	SAMN09459210	SRS3437798	2018-06-20	2018-06-20	128765	128765	128765	128765	2	2	2	2	2	2	2	2	2	2
SAL_QA6463AA	404905	PHE	SRR7402360;ILLUMINA;Paired;;SRX4274506;;	SAL_QA6463AA	Human	Human	human; Homo sapiens	2017	7			Europe	United Kingdom							Typhimurium	I			Public Health England			PRJNA248792	SRP042645	SAMN09463624	SRS3440757	2018-06-21	2018-06-21	126054	126054	119152	119152	119152	2	2	2	2	2	2	2	2	2
SAL_QA6468AA	491013	PHE	SRR7402355;ILLUMINA;Paired;;SRX4274501;;	SAL_QA6468AA	Human	Human	human; Homo sapiens	2018	2			Europe	United Kingdom							Typhimurium	I			Public Health England			PRJNA248792	SRP042645	SAMN09463603	SRS3440752	2018-06-21	2018-06-21	129077	129077	129077	129077	24521	24521	3610	2	2	2	2	2	2	2
SAL_QA6625AA	299858	PHE	SRR7401732;ILLUMINA;Paired;;SRX4273879;;	SAL_QA6625AA	Human	Human	human; Homo sapiens	2016	9			Europe	United Kingdom							Typhimurium	I			Public Health England			PRJNA248792	SRP042645	SAMN09463024	SRS3440202	2018-06-21	2018-06-21	73060	73060	1499	1499	1499	269	269	2	2	2	2	2	2	2
SAL_QA6727AA	308735	PHE	SRR7410296;ILLUMINA;Paired;;SRX4281835;;	SAL_QA6727AA	Human	Human	human; Homo sapiens	2016	10			Europe	United Kingdom							Typhimurium - Monophasic	I			Public Health England			PRJNA248792	SRP042645	SAMN09469092	SRS3446854	2018-06-22	2018-06-22	129355	129355	129355	129355	129355	2	2	2	2	2	2	2	2	2
SAL_QA6750AA	310217	PHE	SRR7408397;ILLUMINA;Paired;;SRX4279936;;	SAL_QA6750AA	Human	Human	human; Homo sapiens	2016	10			Europe	United Kingdom							Typhimurium	I			Public Health England			PRJNA248792	SRP042645	SAMN09468613	SRS3444953	2018-06-22	2018-06-22	129365	129365	129365	129365	2	2	2	2	2	2	2	2	2	2
SAL_QA6770AA	373836	PHE	SRR7408377;ILLUMINA;Paired;;SRX4279916;;	SAL_QA6770AA	Human	Human	human; Homo sapiens	2017	5			Europe	United Kingdom							Typhimurium	I			Public Health England			PRJNA248792	SRP042645	SAMN09468411	SRS3444932	2018-06-22	2018-06-22	126054	126054	119152	119152	119152	2	2	2	2	2	2	2	2	2
SAL_QA6910AA	PNUSAS043774	PHE	SRR7406120;ILLUMINA;Paired;;SRX4277692;;	SAL_QA6910AA								North America	United States											Centers for Disease Control and Prevention Enteric Diseases Laboratory Branch			PRJNA230403	SRP040281	SAMN09466821	SRS3443771	2018-06-22	2018-06-21	129176	129176	129176	129176	129176	129176	2	2	2	2	2	2	2	2
SAL_QA6972AA	PNUSAS043586	PHE	SRR7414845;ILLUMINA;Paired;;SRX4285802;;	SAL_QA6972AA								North America	United States											Centers for Disease Control and Prevention Enteric Diseases Laboratory Branch			PRJNA230403	SRP040281	SAMN09474845	SRS3449940	2018-06-23	2018-06-22	129620	129620	129620	129620	269	269	269	2	2	2	2	2	2	2
SAL_QA7441AA	440792	PHE	SRR7414449;ILLUMINA;Paired;;SRX4285406;;	SAL_QA7441AA	Human	Human	human; Homo sapiens	2017	11			Europe	United Kingdom							Typhimurium	I			Public Health England			PRJNA248792	SRP042645	SAMN09474537	SRS3449554	2018-06-24	2018-06-23	129659	129659	129659	129659	1499	269	269	2	2	2	2	2	2	2
SAL_QA7702AA	462035	PHE	SRR7416344;ILLUMINA;Paired;;SRX4287301;;	SAL_QA7702AA	Human	Human	human; Homo sapiens	2017	12			Europe	United Kingdom							Typhimurium - Monophasic	I			Public Health England			PRJNA248792	SRP042645	SAMN09475964	SRS3451157	2018-06-25	2018-06-24	130289	122353	122353	122353	2	2	2	2	2	2	2	2	2	2
SAL_QA7906AA	278065	PHE	SRR7416115;ILLUMINA;Paired;;SRX4287072;;	SAL_QA7906AA	Human	Human	human; Homo sapiens	2016	7			Europe	United Kingdom							Typhimurium	I			Public Health England			PRJNA248792	SRP042645	SAMN09475637	SRS3450927	2018-06-25	2018-06-24	130925	130925	130925	1471	1471	269	269	2	2	2	2	2	2	2
SAL_QA7978AA	PNUSAS043379	PHE	SRR7419503;ILLUMINA;Paired;;SRX4290460;;	SAL_QA7978AA								North America	United States											Centers for Disease Control and Prevention Enteric Diseases Laboratory Branch			PRJNA230403	SRP040281	SAMN09479056	SRS3453925	2018-06-25	2018-06-25	154676	130130	110000	110000	3610	3610	3610	2	2	2	2	2	2	2
SAL_QA8012AA	PNUSAS041079	PHE	SRR7419933;ILLUMINA;Paired;;SRX4290791;;	SAL_QA8012AA								North America	United States											Centers for Disease Control and Prevention Enteric Diseases Laboratory Branch			PRJNA230403	SRP040281	SAMN09479577	SRS3454210	2018-06-25	2018-06-25	106079	106079	36034	271	269	269	269	2	2	2	2	2	2	2
SAL_QA8051AA	FSIS11810873	PHE	SRR7426339;ILLUMINA;Paired;300;SRX4297161;;	SAL_QA8051AA	Feed	Air	product-raw-intact-beef	2018				North America	United States	California						Typhimurium	I			United States Department of Agriculture	Food Safety and Inspection Service			PRJNA242847	SRP040648	SAMN09479604	SRS3460167	2018-06-26	2018-06-25	130407	130407	103793	271	269	269	269	2	2	2	2	2	2	2
SAL_QA8091AA	N09-0850	PHE	SRR7426159;ILLUMINA;Paired;;SRX4297007;;	SAL_QA8091AA				2009				Europe	Switzerland							Typhimurium	I			CFSAN			PRJNA378379	SRP151302	SAMN08936725	SRS3460019	2018-06-26	2018-06-25	130442	130442	130442	130442	130442	2	2	2	2	2	2	2	2	2
SAL_QA8178AA	534785	PHE	SRR7427056;ILLUMINA;Paired;;SRX4297878;;	SAL_QA8178AA	Human	Human	human; Homo sapiens	2018	5			Europe	United Kingdom							Typhimurium	I			Public Health England			PRJNA248792	SRP042645	SAMN09484574	SRS3460829	2018-06-26	2018-06-26	130759	130759	130759	2033	1471	269	269	2	2	2	2	2	2	2
SAL_QA8445AA	5935	PHE	SRR7417249;ILLUMINA;Paired;;SRX4288206;;	SAL_QA8445AA	Human	Human	human; Homo sapiens	2014	4			Europe	United Kingdom							Typhimurium				Public Health England			PRJNA248792	SRP042645	SAMN09476415	SRS3460912	2018-06-26	2018-06-25	130571	130571	130571	130571	130571	2	2	2	2	2	2	2	2	2
SAL_QA8471AA	PNUSAS043320	PHE	SRR7429489;ILLUMINA;Paired;;SRX4300299;;	SAL_QA8471AA								North America	United States											Centers for Disease Control and Prevention Enteric Diseases Laboratory Branch			PRJNA230403	SRP040281	SAMN09487791	SRS3463090	2018-06-26	2018-06-26	130825	130105	6	6	2	2	2	2	2	2	2	2	2	2
SAL_QA8572AA	N12-1041	PHE	SRR7439231;ILLUMINA;Paired;;SRX4309995;;	SAL_QA8572AA				2012				Europe	Switzerland							Typhimurium	I			CFSAN			PRJNA378379	SRP151302	SAMN08936572	SRS3465913	2018-06-27	2018-06-26	130955	130955	130955	43424	12652	269	269	2	2	2	2	2	2	2
SAL_QA8575AA	N11-1267	PHE	SRR7439234;ILLUMINA;Paired;;SRX4309992;;	SAL_QA8575AA				2011				Europe	Switzerland							Typhimurium	I			CFSAN			PRJNA378379	SRP151302	SAMN08936676	SRS3465911	2018-06-27	2018-06-26	130960	130960	130960	130960	130960	130960	2	2	2	2	2	2	2	2
SAL_QA8604AA	N14-2217	PHE	SRR7439263;ILLUMINA;Paired;;SRX4309963;;	SAL_QA8604AA				2014				Europe	Switzerland							Typhimurium	I			CFSAN			PRJNA378379	SRP151302	SAMN08936639	SRS3465885	2018-06-27	2018-06-26	130943	130943	130943	130943	130943	78526	2	2	2	2	2	2	2	2
SAL_QA8609AA	N13-2152	PHE	SRR7439268;ILLUMINA;Paired;;SRX4309958;;	SAL_QA8609AA	Human	Human	Homo sapiens; feces	2013				Europe	Switzerland							Typhimurium	I			CFSAN			PRJNA378379	SRP151302	SAMN08936494	SRS3465878	2018-06-27	2018-06-26	130921	130921	130921	130921	1535	269	269	2	2	2	2	2	2	2
SAL_QA8740AA	399304	PHE	SRR7439494;ILLUMINA;Paired;;SRX4310222;;	SAL_QA8740AA	Human	Human	human; Homo sapiens	2017	7			Europe	United Kingdom							Typhimurium	I			Public Health England			PRJNA248792	SRP042645	SAMN09493572	SRS3467902	2018-06-27	2018-06-27	131139	131139	1891	1891	1891	269	269	2	2	2	2	2	2	2
SAL_QA8781AA	299954	PHE	SRR7439453;ILLUMINA;Paired;;SRX4310181;;	SAL_QA8781AA	Human	Human	human; Homo sapiens	2016	9			Europe	United Kingdom							Typhimurium	I			Public Health England			PRJNA248792	SRP042645	SAMN09492795	SRS3467240	2018-06-27	2018-06-27	127690	127690	73721	1891	1891	269	269	2	2	2	2	2	2	2
SAL_QA8801AA	470218	PHE	SRR7439433;ILLUMINA;Paired;;SRX4310161;;	SAL_QA8801AA	Human	Human	human; Homo sapiens	2018	1			Europe	United Kingdom							Typhimurium	I			Public Health England			PRJNA248792	SRP042645	SAMN09492687	SRS3467080	2018-06-27	2018-06-27	124842	124842	119581	85463	7386	2	2	2	2	2	2	2	2	2
SAL_QA8931AA	PNUSAS044291	PHE	SRR7442217;ILLUMINA;Paired;;SRX4312817;;	SAL_QA8931AA								North America	United States											Centers for Disease Control and Prevention Enteric Diseases Laboratory Branch			PRJNA230403	SRP040281	SAMN09501411	SRS3471841	2018-06-27	2018-06-27	127796	126333	114836	271	269	269	269	2	2	2	2	2	2	2
SAL_QA9201AA	N17-0705	PHE	SRR7441802;ILLUMINA;Paired;;SRX4312425;;	SAL_QA9201AA	Human	Human	Homo sapiens; blood	2017				Europe	Switzerland							Typhimurium	I			CFSAN			PRJNA378379	SRP151302	SAMN08936698	SRS3471454	2018-06-27	2018-06-27	131292	131292	131292	9928	9928	2	2	2	2	2	2	2	2	2
SAL_QA9216AA	N16-2456	PHE	SRR7441817;ILLUMINA;Paired;;SRX4312410;;	SAL_QA9216AA				2016				Europe	Switzerland							Typhimurium	I			CFSAN			PRJNA378379	SRP151302	SAMN08936684	SRS3471439	2018-06-27	2018-06-27	131277	131277	131277	131277	131277	269	269	2	2	2	2	2	2	2
SAL_QA9521AA	387076	PHE	SRR7443882;ILLUMINA;Paired;;SRX4314421;;	SAL_QA9521AA	Human	Human	human; Homo sapiens	2017	7			Europe	United Kingdom							Typhimurium - Monophasic	I			Public Health England			PRJNA248792	SRP042645	SAMN09503870	SRS3473592	2018-06-28	2018-06-28	131498	131498	131498	131498	2	2	2	2	2	2	2	2	2	2
SAL_QA9614AA	PNUSAS044384	PHE	SRR7447239;ILLUMINA;Paired;;SRX4317786;;	SAL_QA9614AA								North America	United States											Centers for Disease Control and Prevention Enteric Diseases Laboratory Branch			PRJNA230403	SRP040281	SAMN09513288	SRS3480768	2018-06-28	2018-06-28	119367	119367	109712	271	269	269	269	2	2	2	2	2	2	2
SAL_QA9866AA	438628	PHE	SRR7451115;ILLUMINA;Paired;;SRX4321624;;	SAL_QA9866AA	Human	Human	human; Homo sapiens	2017	10			Europe	United Kingdom							Typhimurium	I			Public Health England			PRJNA248792	SRP042645	SAMN09516288	SRS3484090	2018-06-29	2018-06-29	134625	134625	21427	21427	1891	269	269	2	2	2	2	2	2	2
SAL_QA9974AA	552402	PHE	SRR7450790;ILLUMINA;Paired;;SRX4321299;;	SAL_QA9974AA	Human	Human	human; Homo sapiens	2018	6			Europe	United Kingdom							Typhimurium	I			Public Health England			PRJNA248792	SRP042645	SAMN09515980	SRS3483766	2018-06-29	2018-06-29	130759	130759	130759	2033	1471	269	269	2	2	2	2	2	2	2
SAL_RA0130AA	PNUSAS043936	PHE	SRR7456677;ILLUMINA;Paired;;SRX4327173;;	SAL_RA0130AA								North America	United States											Centers for Disease Control and Prevention Enteric Diseases Laboratory Branch			PRJNA230403	SRP040281	SAMN09519740	SRS3489306	2018-06-29	2018-06-29	131832	131832	131832	271	269	269	269	2	2	2	2	2	2	2
SAL_RA0279AA	481496	PHE	SRR7456940;ILLUMINA;Paired;;SRX4327436;;	SAL_RA0279AA	Human	Human	human; Homo sapiens	2018	1			Europe	United Kingdom							Typhimurium	I			Public Health England			PRJNA248792	SRP042645	SAMN09520812	SRS3489564	2018-07-01	2018-06-30	132027	132027	132027	132027	132027	2	2	2	2	2	2	2	2	2
SAL_RA0325AA	308548	PHE	SRR7456894;ILLUMINA;Paired;;SRX4327390;;	SAL_RA0325AA	Human	Human	human; Homo sapiens	2016	10			Europe	United Kingdom							Typhimurium	I			Public Health England			PRJNA248792	SRP042645	SAMN09520742	SRS3489520	2018-07-01	2018-06-30	29827	29827	29827	1891	1891	269	269	2	2	2	2	2	2	2
SAL_RA0390AA	304447	PHE	SRR7456779;ILLUMINA;Paired;;SRX4327275;;	SAL_RA0390AA	Human	Human	human; Homo sapiens	2016	9			Europe	United Kingdom							Typhimurium - Monophasic	I			Public Health England			PRJNA248792	SRP042645	SAMN09519910	SRS3489406	2018-07-01	2018-06-30	131921	131921	131921	131921	131921	2	2	2	2	2	2	2	2	2
SAL_RA0459AA	SMG-18-848	PHE	traces-0edKrLU;ILLUMINA;Paired;;NA;;	SAL_RA0459AA								Europe	United Kingdom	Scotland										D. Brown (Scotland)							2018-07-02	2019-01-04	128359	128359	128359	302	2	2	2	2	2	2	2	2	2	2
SAL_RA0470AA	SMG-18-859	PHE	traces-0zSioFd;ILLUMINA;Paired;;NA;;	SAL_RA0470AA								Europe	United Kingdom	Scotland										D. Brown (Scotland)							2018-07-02	2019-01-04	128359	128359	128359	302	2	2	2	2	2	2	2	2	2	2
SAL_RA0889AA	313244	PHE	SRR7458156;ILLUMINA;Paired;;SRX4328652;;	SAL_RA0889AA	Human	Human	human; Homo sapiens	2016	10			Europe	United Kingdom							Typhimurium - Monophasic	I			Public Health England			PRJNA248792	SRP042645	SAMN09522046	SRS3490753	2018-07-02	2018-07-01	132290	132290	132290	132290	27349	2	2	2	2	2	2	2	2	2
SAL_RA0907AA	430193	PHE	SRR7458138;ILLUMINA;Paired;;SRX4328634;;	SAL_RA0907AA	Human	Human	human; Homo sapiens	2017	10			Europe	United Kingdom							Typhimurium - Monophasic	I			Public Health England			PRJNA248792	SRP042645	SAMN09522028	SRS3490735	2018-07-02	2018-07-01	132304	132304	132304	132304	132304	2	2	2	2	2	2	2	2	2
SAL_RA1237AA	PNUSAS043769	PHE	SRR7466476;ILLUMINA;Paired;;SRX4336384;;	SAL_RA1237AA								North America	United States											Centers for Disease Control and Prevention Enteric Diseases Laboratory Branch			PRJNA230403	SRP040281	SAMN09535926	SRS3497657	2018-07-03	2018-07-03	132720	132720	114836	271	269	269	269	2	2	2	2	2	2	2
SAL_RA1297AA	113063	PHE	SRR7465129;ILLUMINA;Paired;;SRX4335037;;	SAL_RA1297AA	Human	Human	human; Homo sapiens	2015	5			Europe	United Kingdom							Typhimurium	I			Public Health England			PRJNA248792	SRP042645	SAMN09534723	SRS3496498	2018-07-03	2018-07-03	132709	132709	132709	132709	132709	269	269	2	2	2	2	2	2	2
SAL_RA1428AA	PNUSAS045332	PHE	SRR7467273;ILLUMINA;Paired;;SRX4337152;;	SAL_RA1428AA	ND	ND	feces	2018	5			North America	United States											Centers for Disease Control and Prevention Enteric Diseases Laboratory Branch			PRJNA230403	SRP040281	SAMN09537471	SRS3498138	2018-07-03	2018-07-03	119367	119367	109712	271	269	269	269	2	2	2	2	2	2	2
SAL_RA1436AA	PNUSAS045333	PHE	SRR7467265;ILLUMINA;Paired;;SRX4337144;;	SAL_RA1436AA	ND	ND	feces	2018	5			North America	United States											Centers for Disease Control and Prevention Enteric Diseases Laboratory Branch			PRJNA230403	SRP040281	SAMN09537467	SRS3498129	2018-07-03	2018-07-03	113650	113650	113650	271	269	269	269	2	2	2	2	2	2	2
SAL_RA1459AA	PNUSAS043993	PHE	SRR7466932;ILLUMINA;Paired;;SRX4336840;;	SAL_RA1459AA								North America	United States											Centers for Disease Control and Prevention Enteric Diseases Laboratory Branch			PRJNA230403	SRP040281	SAMN09537052	SRS3497930	2018-07-03	2018-07-03	70987	70987	70987	271	269	269	269	2	2	2	2	2	2	2
SAL_RA1468AA	PNUSAS043020	PHE	SRR7468218;ILLUMINA;Paired;;SRX4338093;;	SAL_RA1468AA								North America	United States											Centers for Disease Control and Prevention Enteric Diseases Laboratory Branch			PRJNA230403	SRP040281	SAMN09539601	SRS3499011	2018-07-04	2018-07-03	132855	132855	109712	271	269	269	269	2	2	2	2	2	2	2
SAL_RA1499AA	sam_be7651b6-5149-4245-841d-227c1f263f6b	PHE	ERR2651546;ILLUMINA;Paired;500;ERX2668036;;	SAL_RA1499AA	Human	Human	Homo sapien	2018				Europe	Ireland							Typhimurium	I			University Hospital Galway			PRJEB18998	ERP020979	SAMEA4743729	ERS2563841	2018-07-04	2018-07-04	134897	134897	134897	134897	134897	134897	269	2	2	2	2	2	2	2
SAL_RA1793AA	sam_f7b99541-42d4-4ffd-966d-59485ae81e15	PHE	ERR2641176;ILLUMINA;Paired;500;ERX2657666;;	SAL_RA1793AA	Human	Human	Homo sapien	2018				Europe	Ireland							Typhimurium	I			University Hospital Galway			PRJEB18998	ERP020979	SAMEA4731306	ERS2551435	2018-07-04	2018-07-04	124842	124842	119581	85463	7386	2	2	2	2	2	2	2	2	2
SAL_RA2511AA	PNUSAS045032	PHE	SRR7468792;ILLUMINA;Paired;;SRX4338560;;	SAL_RA2511AA								North America	United States											Centers for Disease Control and Prevention Enteric Diseases Laboratory Branch			PRJNA230403	SRP040281	SAMN09545708	SRS3499474	2018-07-04	2018-07-03	132948	132948	36034	271	269	269	269	2	2	2	2	2	2	2
SAL_RA2626AA	260008	PHE	SRR7469114;ILLUMINA;Paired;;SRX4338882;;	SAL_RA2626AA	Human	Human	human; Homo sapiens	2016	5			Europe	United Kingdom							Typhimurium	I			Public Health England			PRJNA248792	SRP042645	SAMN09566747	SRS3499792	2018-07-04	2018-07-04	136904	136904	136904	136904	136904	78526	2	2	2	2	2	2	2	2
SAL_RA2650AA	465550	PHE	SRR7469083;ILLUMINA;Paired;;SRX4338851;;	SAL_RA2650AA	Human	Human	human; Homo sapiens	2017	12			Europe	United Kingdom							Typhimurium	I			Public Health England			PRJNA248792	SRP042645	SAMN09566377	SRS3499764	2018-07-04	2018-07-04	133153	133153	133153	133153	133153	269	269	2	2	2	2	2	2	2
SAL_RA2782AA	473904	PHE	SRR7468864;ILLUMINA;Paired;;SRX4338632;;	SAL_RA2782AA	Human	Human	human; Homo sapiens	2018	1			Europe	United Kingdom							Typhimurium	I			Public Health England			PRJNA248792	SRP042645	SAMN09557485	SRS3499545	2018-07-04	2018-07-04	132027	132027	132027	132027	132027	2	2	2	2	2	2	2	2	2
SAL_RA2850AA	539970	PHE	SRR7471121;ILLUMINA;Paired;;SRX4340788;;	SAL_RA2850AA	Human	Human	human; Homo sapiens	2018	5			Europe	United Kingdom							Typhimurium	I			Public Health England			PRJNA248792	SRP042645	SAMN09601723	SRS3501519	2018-07-05	2018-07-05	131929	131929	131929	9928	9928	2	2	2	2	2	2	2	2	2
SAL_RA2869AA	397671	PHE	SRR7471102;ILLUMINA;Paired;;SRX4340769;;	SAL_RA2869AA	Human	Human	human; Homo sapiens	2017	7			Europe	United Kingdom							Typhimurium	I			Public Health England			PRJNA248792	SRP042645	SAMN09601734	SRS3501500	2018-07-05	2018-07-05	126054	126054	119152	119152	119152	2	2	2	2	2	2	2	2	2
SAL_RA3062AA	PNUSAS044814	PHE	SRR7472927;ILLUMINA;Paired;;SRX4342564;;	SAL_RA3062AA								North America	United States											Centers for Disease Control and Prevention Enteric Diseases Laboratory Branch			PRJNA230403	SRP040281	SAMN09604562	SRS3503149	2018-07-05	2018-07-05	135067	135067	99969	271	269	269	269	2	2	2	2	2	2	2
SAL_RA3124AA	PNUSAS045580	PHE	SRR7472838;ILLUMINA;Paired;;SRX4342475;;	SAL_RA3124AA								North America	United States											Centers for Disease Control and Prevention Enteric Diseases Laboratory Branch			PRJNA230403	SRP040281	SAMN09604528	SRS3503061	2018-07-05	2018-07-05	134992	134992	134992	271	269	269	269	2	2	2	2	2	2	2
SAL_RA3147AA	PNUSAS045121	PHE	SRR7472815;ILLUMINA;Paired;;SRX4342452;;	SAL_RA3147AA								North America	United States											Centers for Disease Control and Prevention Enteric Diseases Laboratory Branch			PRJNA230403	SRP040281	SAMN09604470	SRS3503045	2018-07-05	2018-07-05	134975	134975	134975	134975	49543	49543	3610	2	2	2	2	2	2	2
SAL_RA3262AA	548920	PHE	SRR7475463;ILLUMINA;Paired;;SRX4344960;;	SAL_RA3262AA	Human	Human	human; Homo sapiens	2018	5			Europe	United Kingdom							Typhimurium - Monophasic	I			Public Health England			PRJNA248792	SRP042645	SAMN09611931	SRS3505007	2018-07-06	2018-07-06	135399	135399	119984	119984	2	2	2	2	2	2	2	2	2	2
SAL_RA3450AA	318589	PHE	SRR7474650;ILLUMINA;Paired;;SRX4344159;;	SAL_RA3450AA	Human	Human	human; Homo sapiens	2016	11			Europe	United Kingdom							Typhimurium	I			Public Health England			PRJNA248792	SRP042645	SAMN09607438	SRS3504395	2018-07-06	2018-07-06	121958	121958	61351	61351	1891	269	269	2	2	2	2	2	2	2
SAL_RA3649AA	563030	PHE	SRR7480402;ILLUMINA;Paired;;SRX4349843;;	SAL_RA3649AA	Human	Human	human; Homo sapiens	2018	6			Europe	United Kingdom							Typhimurium	I			Public Health England			PRJNA248792	SRP042645	SAMN09624410	SRS3509454	2018-07-08	2018-07-07	135520	135520	135520	271	269	269	269	2	2	2	2	2	2	2
SAL_RA3655AA	278622	PHE	SRR7480396;ILLUMINA;Paired;;SRX4349837;;	SAL_RA3655AA	Human	Human	human; Homo sapiens	2016	7			Europe	United Kingdom							Typhimurium	I			Public Health England			PRJNA248792	SRP042645	SAMN09624408	SRS3509448	2018-07-08	2018-07-07	135538	135538	130925	1471	1471	269	269	2	2	2	2	2	2	2
SAL_RA3765AA	313170	PHE	SRR7480140;ILLUMINA;Paired;;SRX4349582;;	SAL_RA3765AA	Human	Human	human; Homo sapiens	2016	10			Europe	United Kingdom							Typhimurium	I			Public Health England			PRJNA248792	SRP042645	SAMN09624114	SRS3509201	2018-07-08	2018-07-07	135454	135454	135454	1679	1471	269	269	2	2	2	2	2	2	2
SAL_RA3775AA	402944	PHE	SRR7480129;ILLUMINA;Paired;;SRX4349571;;	SAL_RA3775AA	Human	Human	human; Homo sapiens	2017	8			Europe	United Kingdom							Typhimurium	I			Public Health England			PRJNA248792	SRP042645	SAMN09624093	SRS3509191	2018-07-08	2018-07-07	135427	135427	135427	135427	135427	135427	135427	2	2	2	2	2	2	2
SAL_RA3946AA	369941	PHE	SRR7495753;ILLUMINA;Paired;;SRX4365194;;	SAL_RA3946AA	Human	Human	human; Homo sapiens	2017	5			Europe	United Kingdom							Typhimurium - Monophasic	I			Public Health England			PRJNA248792	SRP042645	SAMN09628853	SRS3524693	2018-07-09	2018-07-08	135870	73404	73404	73404	2	2	2	2	2	2	2	2	2	2
SAL_RA4081AA	482161	PHE	SRR7495540;ILLUMINA;Paired;;SRX4364981;;	SAL_RA4081AA	Human	Human	human; Homo sapiens	2018	1			Europe	United Kingdom							Typhimurium	I			Public Health England			PRJNA248792	SRP042645	SAMN09628630	SRS3524481	2018-07-09	2018-07-08	135715	135715	119581	85463	7386	2	2	2	2	2	2	2	2	2
SAL_RA5612AA	399486	PHE	SRR7506918;ILLUMINA;Paired;;SRX4377400;;	SAL_RA5612AA	Human	Human	human; Homo sapiens	2017	8			Europe	United Kingdom							Typhimurium	I			Public Health England			PRJNA248792	SRP042645	SAMN09637783	SRS3533550	2018-07-12	2018-07-12	136781	125257	1891	1891	1891	269	269	2	2	2	2	2	2	2
SAL_RA6131AA	NC_WHO_S055	PHE	SRR7504345;ILLUMINA;Paired;500;SRX4373695;;	SAL_RA6131AA	Human	Human	Homo sapiens; Human Stool	2011	9			Asia	Lebanon							Typhimurium	I			FDA Center for Food Safety and Applied Nutrition			PRJNA293224	SRP070120	SAMN09631583	SRS3531282	2018-07-12	2018-07-12	136279	136279	136279	136279	85364	35745	269	2	2	2	2	2	2	2
SAL_RA6133AA	NC_WHO_S054	PHE	SRR7504339;ILLUMINA;Paired;500;SRX4373689;;	SAL_RA6133AA	Human	Human	Homo sapiens; Human Stool	2011	9			Asia	Lebanon							Typhimurium	I			FDA Center for Food Safety and Applied Nutrition			PRJNA293224	SRP070120	SAMN09631579	SRS3531276	2018-07-12	2018-07-12	136309	136308	136279	136279	85364	35745	269	2	2	2	2	2	2	2
SAL_RA6135AA	NC_WHO_S056	PHE	SRR7504337;ILLUMINA;Paired;500;SRX4373687;;	SAL_RA6135AA	Human	Human	Homo sapiens; Human Stool	2011	9			Asia	Lebanon							Typhimurium	I			FDA Center for Food Safety and Applied Nutrition			PRJNA293224	SRP070120	SAMN09635974	SRS3531283	2018-07-12	2018-07-12	136308	136308	136279	136279	85364	35745	269	2	2	2	2	2	2	2
SAL_RA6423AA	PNUSAS045829	PHE	SRR7514787;ILLUMINA;Paired;;SRX4384882;;	SAL_RA6423AA								North America	United States											Centers for Disease Control and Prevention Enteric Diseases Laboratory Branch			PRJNA230403	SRP040281	SAMN09650932	SRS3541085	2018-07-13	2018-07-12	119367	119367	109712	271	269	269	269	2	2	2	2	2	2	2
SAL_RA6659AA	467163	PHE	SRR7516255;ILLUMINA;Paired;;SRX4386295;;	SAL_RA6659AA	Human	Human	human; Homo sapiens	2018	1			Europe	United Kingdom							Typhimurium	I			Public Health England			PRJNA248792	SRP042645	SAMN09651649	SRS3542622	2018-07-13	2018-07-13	137238	137238	137238	137238	1891	269	269	2	2	2	2	2	2	2
SAL_RA6793AA	PNUSAS046220	PHE	SRR7518650;ILLUMINA;Paired;;SRX4388654;;	SAL_RA6793AA								North America	United States											Centers for Disease Control and Prevention Enteric Diseases Laboratory Branch			PRJNA230403	SRP040281	SAMN09655064	SRS3545012	2018-07-13	2018-07-13	137648	137648	137648	6	2	2	2	2	2	2	2	2	2	2
SAL_RA7191AA	445956	PHE	SRR7523681;ILLUMINA;Paired;;SRX4392228;;	SAL_RA7191AA	Human	Human	human; Homo sapiens	2017	11			Europe	United Kingdom							Typhimurium - Monophasic	I			Public Health England			PRJNA248792	SRP042645	SAMN09661763	SRS3548035	2018-07-16	2018-07-16	138109	138109	138109	138109	138109	2	2	2	2	2	2	2	2	2
SAL_RA7258AA	533440	PHE	SRR7523614;ILLUMINA;Paired;;SRX4392161;;	SAL_RA7258AA	Human	Human	human; Homo sapiens	2018	5			Europe	United Kingdom							Typhimurium	I			Public Health England			PRJNA248792	SRP042645	SAMN09661698	SRS3547967	2018-07-16	2018-07-16	137977	137977	137977	137977	137977	269	269	2	2	2	2	2	2	2
SAL_RA7403AA	553222	PHE	SRR7523083;ILLUMINA;Paired;;SRX4391630;;	SAL_RA7403AA	Human	Human	human; Homo sapiens	2018	5			Europe	United Kingdom							Typhimurium	I			Public Health England			PRJNA248792	SRP042645	SAMN09658756	SRS3547453	2018-07-16	2018-07-15	137907	137907	111235	27185	27185	2	2	2	2	2	2	2	2	2
SAL_RA7444AA	534036	PHE	SRR7523042;ILLUMINA;Paired;;SRX4391589;;	SAL_RA7444AA	Human	Human	human; Homo sapiens	2018	5			Europe	United Kingdom							Typhimurium	I			Public Health England			PRJNA248792	SRP042645	SAMN09658702	SRS3547408	2018-07-16	2018-07-15	127636	127636	127636	127636	127636	43444	2	2	2	2	2	2	2	2
SAL_RA7862AA	423895	PHE	SRR7527802;ILLUMINA;Paired;;SRX4396132;;	SAL_RA7862AA				2017	9			Europe	United Kingdom							Typhimurium	I			Public Health England			PRJNA248792	SRP042645	SAMN09666511	SRS3551313	2018-07-17	2018-07-17	139759	139759	139759	28768	393	269	269	2	2	2	2	2	2	2
SAL_RA7956AA	570849	PHE	SRR7533532;ILLUMINA;Paired;;SRX4401461;;	SAL_RA7956AA	Human	Human	human; Homo sapiens	2018	7			Europe	United Kingdom							Typhimurium	I			Public Health England			PRJNA248792	SRP042645	SAMN09684025	SRS3555990	2018-07-18	2018-07-18	73060	73060	1499	1499	1499	269	269	2	2	2	2	2	2	2
SAL_RA8266AA	404729	PHE	SRR7538822;ILLUMINA;Paired;;SRX4406353;;	SAL_RA8266AA	Human	Human	human; Homo sapiens	2017	7			Europe	United Kingdom							Typhimurium	I			Public Health England			PRJNA248792	SRP042645	SAMN09690829	SRS3560316	2018-07-19	2018-07-19	138694	138694	138694	1891	1891	269	269	2	2	2	2	2	2	2
SAL_RA8417AA	FSIS11811971	PHE	SRR7543309;ILLUMINA;Paired;500;SRX4409616;;	SAL_RA8417AA	Livestock	Swine	animal-swine-market swine	2018				North America	United States	South Dakota						I 4	[5]	12:I:-	I			United States Department of Agriculture	Food Safety and Inspection Service			PRJNA292666	SRP062916	SAMN09693157	SRS3563250	2018-07-20	2018-07-19	135976	135976	6	6	2	2	2	2	2	2	2	2	2	2
SAL_RA9763AA	CFSAN084201	PHE	SRR7643311;ILLUMINA;Paired;500;SRX4506745;;	SAL_RA9763AA	Livestock	Swine	Pork Meat	2017				North America	United States	Utah										FDA Center for Food Safety and Applied Nutrition			PRJNA186035	SRP018785	SAMN09765134	SRS3627044	2018-08-03	2018-08-03	139229	139229	139229	139229	125113	2	2	2	2	2	2	2	2	2
SAL_SA1090AA	FSIS21821930	PHE	SRR7691981;ILLUMINA;Paired;300;SRX4551540;;	SAL_SA1090AA	Poultry	Air	Product-Raw-Ground	Comminuted or Otherwise Nonintact-Pork	2018				North America	United States	New Jersey						I 4	[5]	12:I:-	I			United States Department of Agriculture	Food Safety and Inspection Service			PRJNA242847	SRP040648	SAMN09829998	SRS3668637	2018-08-14	2018-08-14	141586	141586	141586	139229	125113	2	2	2	2	2	2	2	2
SAL_SA1401AA	MEXSALYUHS07-18	PHE	traces-0ekfXZU;ILLUMINA;Paired;;;;	SAL_SA1401AA	Human	Human		2007				North America	Mexico							Typhimurium				M. Achtman		M. Zaidi (Mexico)					2018-08-15	2018-10-09	133803	133803	133803	133803	133803	3610	3610	2	2	2	2	2	2	2
SAL_SA1402AA	MEXSALYUPUS03-18	PHE	traces-0prsnqJ;ILLUMINA;Paired;;;;	SAL_SA1402AA	Livestock	Swine	Pig	2003				North America	Mexico							Typhimurium				M. Achtman		M. Zaidi (Mexico)					2018-08-15	2018-10-09	133804	133804	79146	79146	79146	3610	3610	2	2	2	2	2	2	2
SAL_SA1404AA	MEXSALSLRARES04-8	PHE	traces-0RvsKfq;ILLUMINA;Paired;;;;	SAL_SA1404AA	Livestock	Swine	Pig	2004				North America	Mexico							Typhimurium				M. Achtman		M. Zaidi (Mexico)					2018-08-15	2018-10-09	133808	133808	133808	133808	85274	3610	3610	2	2	2	2	2	2	2
SAL_SA1406AA	MEXSALYUHS04-39	PHE	traces-0UPBygE;ILLUMINA;Paired;;;;	SAL_SA1406AA	Human	Human		2004				North America	Mexico							Typhimurium				M. Achtman		M. Zaidi (Mexico)					2018-08-15	2018-10-09	133805	133805	133805	133805	5511	3610	3610	2	2	2	2	2	2	2
SAL_SA1407AA	MEXSALYUHS05-75	PHE	traces-0yLDlYu;ILLUMINA;Paired;;;;	SAL_SA1407AA	Human	Human		2005				North America	Mexico							Typhimurium				M. Achtman		M. Zaidi (Mexico)					2018-08-15	2018-10-09	133810	133810	133810	133810	5511	3610	3610	2	2	2	2	2	2	2
SAL_SA1408AA	MEXSALYUHS05-78	PHE	traces-0bZzOmJ;ILLUMINA;Paired;;;;	SAL_SA1408AA	Human	Human		2005				North America	Mexico							Typhimurium				M. Achtman		M. Zaidi (Mexico)					2018-08-15	2018-10-09	5511	5511	5511	5511	5511	3610	3610	2	2	2	2	2	2	2
SAL_SA1545AA	H2434	PHE	traces-0zzmiyJ;ILLUMINA;Paired;;;;	SAL_SA1545AA				2001				Africa	South Africa							Typhimurium				M. Achtman		L. Harrison (Univ of Pittsburgh)					2018-08-15	2018-10-09	133976	133976	133976	133976	133976	133976	269	2	2	2	2	2	2	2
SAL_SA1547AA	H2548	PHE	traces-0xEpXpt;ILLUMINA;Paired;;;;	SAL_SA1547AA				2001				Africa	South Africa							Typhimurium				M. Achtman		L. Harrison (Univ of Pittsburgh)					2018-08-15	2018-10-09	133975	133975	86238	86238	86238	269	269	2	2	2	2	2	2	2
SAL_SA1556AA	M183	PHE	traces-0HYsrCY;ILLUMINA;Paired;;;;	SAL_SA1556AA				2001				Europe	Belgium							Typhimurium				M. Achtman		L. Harrison (Univ of Pittsburgh)					2018-08-15	2018-10-09	133984	133984	133984	84985	84985	2	2	2	2	2	2	2	2	2
SAL_SA1713AA	MC_04-0112	PHE	traces-0rghWNc;ILLUMINA;Paired;;;;	SAL_SA1713AA	Human	Human	Faeces	2004				Europe	Ireland							Typhimurium				M. Achtman	DT7	M. Cormican (NSRL	Galway)					2018-08-15	2018-10-09	134379	134379	134379	134379	134379	2	2	2	2	2	2	2	2	2
SAL_SA1762AA	MC_05-0172	PHE	traces-0FvnCZt;ILLUMINA;Paired;;;;	SAL_SA1762AA	Human	Human	Faeces	2005				Europe	Ireland							Typhimurium				M. Achtman	DT193	M. Cormican (NSRL	Galway)					2018-08-15	2018-10-09	134339	134339	134339	134339	134339	2	2	2	2	2	2	2	2	2
SAL_SA1772AA	MC_07-0698	PHE	traces-0KVGNTg;ILLUMINA;Paired;;;;	SAL_SA1772AA	Human	Human	Faeces	2007				Europe	Ireland							Typhimurium				M. Achtman	DT193	M. Cormican (NSRL	Galway)					2018-08-15	2018-10-09	134329	134329	134329	134329	134329	2	2	2	2	2	2	2	2	2
SAL_SA2007AA	0410R6098	PHE	traces-0sJusni;ILLUMINA;Paired;;;;	SAL_SA2007AA	Human	Human		2004				Europe	Denmark							Typhimurium				M. Achtman		M. Torpdahl (SSI	Denmark)					2018-08-15	2018-10-09	134133	134133	134133	134133	134133	269	269	2	2	2	2	2	2	2
SAL_SA2023AA	0502R6248	PHE	traces-0iASLsa;ILLUMINA;Paired;;;;	SAL_SA2023AA	Human	Human		2005				Europe	Denmark							Typhimurium				M. Achtman		M. Torpdahl (SSI	Denmark)					2018-08-15	2018-10-09	134119	134119	134119	134119	85861	2	2	2	2	2	2	2	2	2
SAL_SA2029AA	0504R6364	PHE	traces-0MRISdp;ILLUMINA;Paired;;;;	SAL_SA2029AA	Human	Human		2005				Europe	Denmark							Typhimurium				M. Achtman		M. Torpdahl (SSI	Denmark)					2018-08-15	2018-10-09	134113	134113	134113	105797	105797	2	2	2	2	2	2	2	2	2
SAL_SA2062AA	0509T67820	PHE	traces-0lfvVlG;ILLUMINA;Paired;;;;	SAL_SA2062AA	Human	Human		2005				Europe	Denmark							Typhimurium				M. Achtman		M. Torpdahl (SSI	Denmark)					2018-08-15	2018-10-09	134080	134080	134080	134080	134080	269	269	2	2	2	2	2	2	2
SAL_SA2063AA	0509W77328	PHE	traces-0OQLDjV;ILLUMINA;Paired;;;;	SAL_SA2063AA	Human	Human		2005				Europe	Denmark							Typhimurium				M. Achtman		M. Torpdahl (SSI	Denmark)					2018-08-15	2018-10-09	134079	134079	105797	105797	105797	2	2	2	2	2	2	2	2	2
[truncated: 29,434 more rows]
[truncated: 67 more columns]
